# Supplementary material for: NHR-49/PPAR-α and HLH-30/TFEB cooperate for C. elegans host defense via a flavin-containing monooxygenase
Source: eLife. 2021 May 12;10:e62775. doi: 10.7554/eLife.62775 (PMC8139828; doi:10.7554/eLife.62775)
Supplement: Figure 1—figure supplement 1—source data 1. [file elife-62775-fig1-figsupp1-data1.xlsx]

## Sheet: Sheet1
		2^(-ΔΔCt) values_For Graph
fmo-2 E.coli	fmo-2 S. aureus	fmo-2 Starvation	H02F09.3 E.coli	H02F09.3 S. aureus	H02F09.3 Starvation	ech-9 E.coli	ech-9 S. aureus	ech-9 Starvation	Y65B4BR.1 E.coli	Y65B4BR.1 S. aureus	Y65B4BR.1 Starvation	C50F7.5 E.coli	C50F7.5 S. aureus	C50F7.5 Starvation	srr-6 E.coli	srr-6 S. aureus	srr-6 Starvation	Y47H9C.1 E.coli	Y47H9C.1 S. aureus	Y47H9C.1 Starvation	K08C7.4 E.coli	K08C7.4 S. aureus	K08C7.4 Starvation	irg-5 E.coli	irg-5 S. aureus	irg-5 Starvation	C33A12.19 E.coli	C33A12.19 S. aureus	C33A12.19 Starvation	clec-52 E.coli	clec-52 S. aureus	clec-52 Starvation	pals-39 E.coli	pals-39 S. aureus	pals-39 Starvation	mpk-2 E.coli	mpk-2 S. aureus	mpk-2 Starvation
0.651461	4081.83	219.184	0.789699	12.6933	0.942458	0.80406	69.2384	14.8975	1.6429	83.6331	12.5926	0.357806	858.695	63.426	1.66483	35.8773	8.6969	1.01916	11.6681	1.16272	1.45435	4.10534	1.34025	1.07904	7.1602	2.24544	0.855372	4.56148	1.25223	1.0873	22.1311	3.7399	0.919471	45.2392	3.71922	0.954786	8.31087	2.97317
1.76755	1342.77	34.7997	0.785604	19.1066	0.874482	0.866261	53.0765	12.0378	1.63949	92.1555	12.549	0.942949	251.079	44.8799	1.21915	52.9478	4.98468	1.82877	5.1712	0.365514	1.19904	8.84891	2.47427	0.967779	6.9163	2.51839	1.04183	2.92006	1.15669	1.56564	25.1067	2.50533	1.02696	23.167	4.7783	0.647185	8.29362	4.84334
0.690518	2104.12	84.098	1.17233	13.4264	0.617281	0.898055	60.0461	5.75972	0.466921	425.79	12.1089	2.15286	564.958	26.3732	0.649038	67.5554	13.1046	0.588403	9.02544	0.541487	0.713693	15.1579	2.02792	1.07531	4.19304	0.854409	1.01581	5.50216	0.382093	0.789905	47.8683	7.65816	0.924583	28.0514	8.40355	1.44618	3.11234	1.99723
1.25767	1324.29	79.8931	1.37495	9.18959	0.686104	1.59867	67.837	1.62225	0.795123	467.882	10.0352	1.37673	1119.78	43.8955	0.759108	143.211		0.911854	16.5757	0.660211	0.803503	23.5556	2.13465	0.890538	10.4686	0.857971	1.10468	4.23101	0.299993	0.743678	54.1167	7.16517	1.14542	30.2529	9.10086	1.11903	4.44136	1.16151
		ΔCt values_For _Statistics
fmo-2 E.coli	fmo-2 S. aureus	fmo-2 Starvation	H02F09.3 E.coli	H02F09.3 S. aureus	H02F09.3 Starvation	ech-9 E.coli	ech-9 S. aureus	ech-9 Starvation	Y65B4BR.1 E.coli	Y65B4BR.1 S. aureus	Y65B4BR.1 Starvation	C50F7.5 E.coli	C50F7.5 S. aureus	C50F7.5 Starvation	srr-6 E.coli	srr-6 S. aureus	srr-6 Starvation	Y47H9C.1 E.coli	Y47H9C.1 S. aureus	Y47H9C.1 Starvation	K08C7.4 E.coli	K08C7.4 S. aureus	K08C7.4 Starvation	irg-5 E.coli	irg-5 S. aureus	irg-5 Starvation	C33A12.19 E.coli	C33A12.19 S. aureus	C33A12.19 Starvation	clec-52 E.coli	clec-52 S. aureus	clec-52 Starvation	pals-39 E.coli	pals-39 S. aureus	pals-39 Starvation	mpk-2 E.coli	mpk-2 S. aureus	mpk-2 Starvation
9.945	-2.05	2.169	7.966	4.3	8.0515	9.3065	3.193	5.4095	8.916	2.53	5.2615	10.233	0.487	4.246	9.068	3.903	5.9475	7.1435	3.599	6.926	8.894	6.8565	8.4715	3.643	0.802999	2.476	4.442	2.2525	4.1175	5.422	0.953999	3.519	12.333	6.8335	10.438	7.614	4.559	6.042
8.505	-1.886	3.384	7.9735	3.7175	8.167	9.199	3.469	5.6095	8.919	2.393	5.2695	8.835	0.862999	3.347	9.5175	3.791	7.2	6.3	3.9295	7.752	9.1725	6.027	7.8655	3.8	1.01	2.4675	4.1575	2.6115	3.9475	4.896	0.245998	3.571	12.1735	7.6395	9.917	8.175	5.123	5.899
9.861	-1.178	3.467	7.396	3.649	8.092	9.147	3.239	6.621	10.731	1.997	7.133	7.644	-1.498	2.923	10.427	4.349	6.715	7.936	4.762	8.821	9.921	5.999	8.901	3.648	1.58	3.875	4.194	1.734	5.582	5.883	0.302	2.946	12.325	7.515	9.254	7.015	5.377	6.017
8.996	-1.375	2.676	7.166	3.966	7.7095	8.315	2.231	7.617	9.963	1.093	6.636	8.289	-1.84	2.833	10.201	3.039		7.304	3.253	7.903	9.75	5.192	8.656	3.92	0.532	4.141	4.073	1.992	5.81	5.97	0.212	3.129	12.016	7.097	8.83	7.385	5.234	7.169
