# Supplementary material for: NHR-49/PPAR-α and HLH-30/TFEB cooperate for C. elegans host defense via a flavin-containing monooxygenase
Source: eLife. 2021 May 12;10:e62775. doi: 10.7554/eLife.62775 (PMC8139828; doi:10.7554/eLife.62775)
Supplement: Figure 1—figure supplement 1—source data 2. [file elife-62775-fig1-figsupp1-data2.xlsx]

## Sheet: Sheet1
		2^(-ΔΔCt) values_For Graph
fmo-2 E.coli	fmo-2 S. aureus	fmo-2 Starvation	H02F09.3 E.coli	H02F09.3 S. aureus	H02F09.3 Starvation	ech-9 E.coli	ech-9 S. aureus	ech-9 Starvation	Y65B4BR.1 E.coli	Y65B4BR.1 S. aureus	Y65B4BR.1 Starvation	C50F7.5 E.coli	C50F7.5 S. aureus	C50F7.5 Starvation	srr-6 E.coli	srr-6 S. aureus	srr-6 Starvation	Y47H9C.1 E.coli	Y47H9C.1 S. aureus	Y47H9C.1 Starvation	K08C7.4 E.coli	K08C7.4 S. aureus	K08C7.4 Starvation	irg-5 E.coli	irg-5 S. aureus	irg-5 Starvation	C33A12.19 E.coli	C33A12.19 S. aureus	C33A12.19 Starvation	clec-52 E.coli	clec-52 S. aureus	clec-52 Starvation	pals-39 E.coli	pals-39 S. aureus	pals-39 Starvation	mpk-2 E.coli	mpk-2 S. aureus	mpk-2 Starvation
0.555747	1749.83	30.5903	0.820457	4.23394	0.426909	1.32869	19.0141	4.88379	0.948191	6.40412	3.09299	0.517005	135.111	18.0384	1.27302	12.1173	4.22807	1.074	5.60223	1.91322	0.928195	2.90996	1.47631	0.777411	4.38325	2.52101	0.902657	6.56593	1.14552	1.73869	2.10672	0.505927	1.16979	10.883	7.24507	1.00452	2.04911	1.65405
0.376964	3198.1	64.9834	0.868441	2.72074	0.462011	1.46003	16.7722	5.29269	1.07494	3.46775	1.9917	0.295709	221.168	81.4589	1.49926	9.06936	3.95588	1.28343	6.31595	1.48658	0.963596	2.247	0.903753	0.961094	3.72696	1.48555	0.99948	6.41745	1.53581	1.68296	2.92006	0.558256	1.39983	8.36288	4.74366	0.410229	4.21052	6.9789
2.75777	199.052	1.86477	0.963596	8.5386	0.797745	0.632878	40.9559	1.28432	1.21778	18.9352	1.32317	2.09108	17.9511	2.13613	0.528234	33.942	2.48975	0.770037	11.7452	1.28432	1.11226	1.55725	0.88148	1.19976	5.47933	1.17772	1.12136	5.49454	0.357001	0.660211	7.65287	1.6449	0.759567	8.53269	3.51372	1.60492	1.18756	1.337
1.73087	375.326	3.05675	1.45649	1.82893	0.763659	0.814508	8.11168	2.06337	0.805664	11.2433	2.20687	3.12802	18.8305	0.23586	0.991889	38.5324	0.688725	0.942131	8.62784	2.1038	1.00521	1.6245	1.14076	1.11555	4.91094	2.12727	0.988457	4.90074	0.139855	0.517632	9.69338	3.04196	0.80399	39.3148	3.20206	1.51204	1.34537	0.980099
		ΔCt values_For Statistics
fmo-2 E.coli	fmo-2 S. aureus	fmo-2 Starvation	H02F09.3 E.coli	H02F09.3 S. aureus	H02F09.3 Starvation	ech-9 E.coli	ech-9 S. aureus	ech-9 Starvation	Y65B4BR.1 E.coli	Y65B4BR.1 S. aureus	Y65B4BR.1 Starvation	C50F7.5 E.coli	C50F7.5 S. aureus	C50F7.5 Starvation	srr-6 E.coli	srr-6 S. aureus	srr-6 Starvation	Y47H9C.1 E.coli	Y47H9C.1 S. aureus	Y47H9C.1 Starvation	K08C7.4 E.coli	K08C7.4 S. aureus	K08C7.4 Starvation	irg-5 E.coli	irg-5 S. aureus	irg-5 Starvation	C33A12.19 E.coli	C33A12.19 S. aureus	C33A12.19 Starvation	clec-52 E.coli	clec-52 S. aureus	clec-52 Starvation	pals-39 E.coli	pals-39 S. aureus	pals-39 Starvation	mpk-2 E.coli	mpk-2 S. aureus	mpk-2 Starvation
12.133	1.36	7.198	7.054	4.972	8.282	6.706	2.457	4.418	10.191	7.512	8.562	7.3	0.222	3.127	7.728	4.129	5.648	5.797	3.311	4.861	8.107	6.566	7.545	1.516	-0.616	0.182	4.283	1.568	4.087	3.67	2.595	4.653	9.314	5.87	6.457	7.019	5.984	6.293
12.693	1.05	6.671	6.972	5.528	8.086	6.57	2.502	4.166	10.01	8.216	9.016	8.106	0.317	1.758	7.492	4.311	5.508	5.54	2.881	4.968	8.053	6.885	8.199	1.21	-0.688	0.639	4.136	1.454	3.517	3.717	2.171	4.558	9.055	5.991	6.809	8.311	6.237	5.508
9.822	2.185	8.923	6.822	3.728	7.148	7.776	2.42	7.415	9.83	5.587	9.426	5.284	1.118	4.189	8.997	3.912	7.681	6.277	2.723	5.916	7.846	7.207	8.028	0.89	-1.564	0.654	3.97	1.512	5.456	5.067	2.131	4.349	9.937	6.844	8.124	6.343	6.095	5.924
10.494	1.942	8.882	6.226	5.355	6.615	7.412	4.392	6.367	10.426	6.935	9.284	4.703	0.468	6.787	8.088	2.82	8.626	5.986	2.877	4.913	7.992	7.292	7.802	0.995	-1.301	-0.094	4.152	1.859	6.99	5.418	2.141	3.813	9.855	4.558	8.176	6.429	6.001	6.458
