# Supplementary material for: NHR-49/PPAR-α and HLH-30/TFEB cooperate for C. elegans host defense via a flavin-containing monooxygenase
Source: eLife. 2021 May 12;10:e62775. doi: 10.7554/eLife.62775 (PMC8139828; doi:10.7554/eLife.62775)
Supplement: Figure 2—source data 1. [file elife-62775-fig2-data1.xlsx]

## Sheet: Sheet1
	2^(-ΔΔCt) values_For Graph
Wild type_ E.coli	Wild type_ S. aureus	hlh-30(tm1978)_ E.coli	hlh-30(tm1978)_ S. aureus	JIN1693_ E.coli	JIN1693_ S. aureus
0.698339	1889.78	0.447823	51.2329	8.60992	1777.95
1.1274	1315.14	0.191445	29.8778	1.82513	1089.16
1.02527	2380.42	0.634635	53.1501	3.23328	1774.26
1.23885	2040.91	0.346758	64.0444
		ΔCt values_For Statistics
Wild type_ E.coli	Wild type_ S. aureus	hlh-30(tm1978)_ E.coli	hlh-30(tm1978)_ S. aureus	JIN1693_ E.coli	JIN1693_ S. aureus
9.087	-1.797	10.246	3.408	5.981	-1.709
8.396	-1.965	10.781	3.495	7.528	-1.693
8.533	-2.684	9.189	2.801	6.84	-2.26
8.26	-2.735	9.788	2.259
