# Supplementary material for: NHR-49/PPAR-α and HLH-30/TFEB cooperate for C. elegans host defense via a flavin-containing monooxygenase
Source: eLife. 2021 May 12;10:e62775. doi: 10.7554/eLife.62775 (PMC8139828; doi:10.7554/eLife.62775)
Supplement: Figure 3—figure supplement 1—source data 1. [file elife-62775-fig3-figsupp1-data1.xlsx]

## Sheet: Sheet1
2^(-ΔΔCt) values_For Graph
fmo-2 E.coli	fmo-2 S. aureus	fmo-2 P. aeruginosa
0.624382	5042.77	1.80688
0.999307	3386.31	0.868441
0.996886	3257.39	0.817052
1.6077	2077.31	0.381036
ΔCt values_For Statistics
fmo-2 E.coli	fmo-2 S. aureus	fmo-2 P. aeruginosa
9.512	-2.788	8.6585
8.8335	-2.892	9.037
8.837	-2.8325	9.1285
8.1475	-2.873	9.5395
