# Supplementary material for: NHR-49/PPAR-α and HLH-30/TFEB cooperate for C. elegans host defense via a flavin-containing monooxygenase
Source: eLife. 2021 May 12;10:e62775. doi: 10.7554/eLife.62775 (PMC8139828; doi:10.7554/eLife.62775)
Supplement: Figure 3—figure supplement 1—source data 2. [file elife-62775-fig3-figsupp1-data2.xlsx]

## Sheet: Sheet1
		Mean fluorescence intensity (A.U.)
Animal #	Wild type_OP50	Wildtype_Starvation	Wildtype_P. aeruginosa	Wildtype_S. aureus
1	579.387	1177.1	546.018	18977.1
2	797.47	952.51	611.419	2871.63
3	647.758	802.744	567.75	16045.7
4	724.209	843.358	900.418	9265.47
5	828.913	657.653	806.096	2915.17
6	640.111	1239.86	781.232	4608.31
7	609.598	727.282	652.192	2692.56
8	576.336	814.569	1085.93	28299.7
9	777.612	652.672	790.307	9118.78
10	714.844	688.833	745.565	8809.81
11	702.746	687.462	832.367	26585.2
12	733.436	760.707	724.838	8701.34
13	758.833	836.505	940.534	3470.4
14	860.989	1126.33	656.883	5229.24
15	775.853	1079.93	807.514	6587.53
16	766.161	776.508	611.508	20114.8
17	681.862	694.914	795.273	2738.1
18	692.665	786.603	664.453	7048.55
19	794.105	828.933	657.541	13432.2
20	675.223	773.705	622.007	9707.32
21	760.668	949.125	667.644	2427.25
22	615.365	932.995	735.219	3487.63
23	712.809	1704.87	668.345	16290.7
24	705.171	1042.93	1004.15	868.201
25	617.134	1755.48	685.221	2613.16
26	1037.95	612.274	716.783	13837.5
27	815.748	683.785	615.398	5239.1
28	763.759	644.926	721.719	3551.08
29	798.369	647.456	896.779	3583.03
30	691.726	840.866	730.988	11467.1
31	719.153	716.698	901.667	3688.37
32	719.148	1097.19	817.857	15984.8
33	699.644	950.557	768.694	6630.74
34	794.505	1241.46	680.104	18405.5
35	655.052	826.028	645.605	3418.07
36	705.507	594.176	675.144	3068.47
37	780.606	1123.65	800.206	6730.68
38	724.753	2957.59	784.015	15615.9
39	857.236	720.862	723.44	3892.62
40	658.051	1336.97	724.866	15673.5
41	645.31	987.766	967.794	18699.5
42	630.763	1145.35	765.11	6879.34
43	668.191		782.978	5126.73
44	698.465		742.095	11289.8
45	947.851		715.828	9977.93
46	604.477		689.942	24137.3
47	690.928		614.734	8943.9
48	604.942		791.2	5587.81
49	652.357		509.153	18100.6
50	620.865		989.097	6982.52
51	677.635		802.019	14535.8
52	565.234		626.563	12247.8
53	730.005		649.639	16125.6
54	695.602		703.916	2713.83
55	729.862		632.291	7954.57
56	808.985		679.379	14211.9
57	818.69		749.871	13426.5
58	683.517		801.411	8904.59
59	969.696		621.526	13098.8
60			692.071
61			599.645
62			893.43
63			637.029
64			801.821
65			853.574
66			834.063
67			702.135
