# Supplementary material for: NHR-49/PPAR-α and HLH-30/TFEB cooperate for C. elegans host defense via a flavin-containing monooxygenase
Source: eLife. 2021 May 12;10:e62775. doi: 10.7554/eLife.62775 (PMC8139828; doi:10.7554/eLife.62775)
Supplement: Figure 3—figure supplement 2—source data 1. [file elife-62775-fig3-figsupp2-data1.xlsx]

## Sheet: Sheet1
		clec-52
	2^(-ΔΔCt) values_For Graph
Wild type_E.coli	Wild type_S. aureus	nhr-49(nr2041)_E. coli	nhr-49(nr2041)_S. aureus
0.699	40.56	8.44443	50.3702
1.432	21.766	3.02619	28.611
0.96	24.71	7.561	55.2346
1.041	27.209	9.6	60.1086
	ΔCt values_For Statistics
Wild type_E.coli	Wild type_S. aureus	nhr-49(nr2041)_E. coli	nhr-49(nr2041)_S. aureus
3.742	-1.5995	0.664499	-1.912
2.707	-1.737	1.109	-2.1315
4.703	0.0760002	1.7845	-1.0845
4.587	-0.1795	1.323	-1.323
