# Supplementary material for: NHR-49/PPAR-α and HLH-30/TFEB cooperate for C. elegans host defense via a flavin-containing monooxygenase
Source: eLife. 2021 May 12;10:e62775. doi: 10.7554/eLife.62775 (PMC8139828; doi:10.7554/eLife.62775)
Supplement: Figure 3—figure supplement 2—source data 2. [file elife-62775-fig3-figsupp2-data2.xlsx]

## Sheet: Sheet1
	Y47H9C.1
	2^(-ΔΔCt) values_For Graph
Wild type_E.coli	Wild type_S. aureus	nhr-49(nr2041)_E. coli	nhr-49(nr2041)_S. aureus
1.16979	3.61626	1.71951	7.33094
0.854854	6.39525	1.64547	16.9123
0.93271	6.26363	3.00216	11.4796
1.07215	5.77571	4.06006	8.37158
	ΔCt values_For Statistics
Wild type_E.coli	Wild type_S. aureus	nhr-49(nr2041)_E. coli	nhr-49(nr2041)_S. aureus
6.015	4.1605	5.233	3.141
6.4675	3.7905	5.749	2.387
6.1655	3.5185	4.5795	2.6445
5.9645	3.4345	3.943	2.899
