# Supplementary material for: NHR-49/PPAR-α and HLH-30/TFEB cooperate for C. elegans host defense via a flavin-containing monooxygenase
Source: eLife. 2021 May 12;10:e62775. doi: 10.7554/eLife.62775 (PMC8139828; doi:10.7554/eLife.62775)
Supplement: Figure 3—figure supplement 2—source data 3. [file elife-62775-fig3-figsupp2-data3.xlsx]

## Sheet: Sheet1
		K08C7.4
	2^(-ΔΔCt) values_For Graph
Wild type_E.coli	Wild type_S. aureus	nhr-49(nr2041)_E. coli	nhr-49(nr2041)_S. aureus
0.924	20.937	1.71773	2.439
1.082	21.986	1.92719	1.778
0.89456	13.6233	2.83333	4.51117
1.118	12.109	4.15112	1.33607
	ΔCt values_For Statistics
Wild type_E.coli	Wild type_S. aureus	nhr-49(nr2041)_E. coli	nhr-49(nr2041)_S. aureus
9.925	5.537	9.1445	8.6385
9.6975	5.239	8.751	8.867
10.5695	6.8015	9.067	8.396
10.248	6.65	8.1945	9.83
