# Supplementary material for: NHR-49/PPAR-α and HLH-30/TFEB cooperate for C. elegans host defense via a flavin-containing monooxygenase
Source: eLife. 2021 May 12;10:e62775. doi: 10.7554/eLife.62775 (PMC8139828; doi:10.7554/eLife.62775)
Supplement: Figure 3—figure supplement 2—source data 4. [file elife-62775-fig3-figsupp2-data4.xlsx]

## Sheet: Sheet1
		C33A12.19
	2^(-ΔΔCt) values_For Graph
Wild type_E.coli	Wild type_S. aureus	nhr-49(nr2041)_E. coli	nhr-49(nr2041)_S. aureus
0.64649	8.96933	1.22476	4.05303
1.54671	3.3566	0.315017	2.88986
0.822735	3.39403	1.47887	2.80986
1.21546	3.09835	1.65921	4.06992
	ΔCt values_For Statistics
Wild type_E.coli	Wild type_S. aureus	nhr-49(nr2041)_E. coli	nhr-49(nr2041)_S. aureus
3.682	0.517	3.3895	1.663
2.4235	0.6765	4.09	0.892
4.282	2.519	3.7175	2.7915
3.719	2.0875	2.9885	1.694
