# Supplementary material for: NHR-49/PPAR-α and HLH-30/TFEB cooperate for C. elegans host defense via a flavin-containing monooxygenase
Source: eLife. 2021 May 12;10:e62775. doi: 10.7554/eLife.62775 (PMC8139828; doi:10.7554/eLife.62775)
Supplement: Figure 3—figure supplement 2—source data 5. [file elife-62775-fig3-figsupp2-data5.xlsx]

## Sheet: Sheet1
		C54F6.12
	2^(-ΔΔCt) values_For Graph
Wild type_E.coli	Wild type_S. aureus	nhr-49(nr2041)_E. coli	nhr-49(nr2041)_S. aureus
0.612168	39.2467	4.90414	34.5593
1.63354	11.7615	1.67423	15.6925
0.866487	22.1311	11.2006	41.0554
1.15409	26.7691	9.44138	50.3353
	ΔCt values_For Statistics
Wild type_E.coli	Wild type_S. aureus	nhr-49(nr2041)_E. coli	nhr-49(nr2041)_S. aureus
9.6295	4.335	7.3355	4.5185
8.2135	4.6575	7.47	4.241
10.72	6.252	7.2345	5.3605
10.3065	5.564	7.0675	4.653
