# Supplementary material for: NHR-49/PPAR-α and HLH-30/TFEB cooperate for C. elegans host defense via a flavin-containing monooxygenase
Source: eLife. 2021 May 12;10:e62775. doi: 10.7554/eLife.62775 (PMC8139828; doi:10.7554/eLife.62775)
Supplement: Figure 3—figure supplement 3—source data 1. [file elife-62775-fig3-figsupp3-data1.xlsx]

## Sheet: Sheet1
		Mean fluorescence intensity (A.U.)
Animal #	Wild type_OP50	Wildtype_S. aureus	nhr-49(nr2041)_OP50	nhr-49(nr2041)_S. aureus
1	4814	3134.14	1967.98	4221.86
2	5328.77	5000.86	4544.88	4445.68
3	2843.56	8009.2	4040.97	2734.81
4	4738.54	4931.7	5245.23	3841.23
5	4532.3	4177.02	3356.24	2476.97
6	3639.23	7512.56	5645.44	5348.17
7	3557.36	4069.39	3156.49	2696.06
8	5131.66	4911.76	4260.41	3294.58
9	3970.19	2550.25	6055.12	2599.84
10	6516.44	5430.84	2004.55	2296.87
11	4238.72	6683.93	2268.4	4796.37
12	3361.6	5926.82	5077.51	2325.12
13	4445.4	5235.16	4665.3	2986.73
14	5521.04	6304.38	3587.92	2456.34
15	4558.28	6918.72	2651.14	3670.11
16	3777.19	5904.61	4871.75	1952.3
17	5347.12	4201.95	5300.17	3024.79
18	4448.14	4699.67	4987.76	2497.21
19	4499.7	3279.22	4407.92	4345.2
20	2351.25	4323.34	2523.06	2631.27
21	4170.97	3726.78	3245.46	5408.19
22	4170.69	6322.71	3200.57	3336.06
23	3219.59	4596.46	3691.19	4450.26
24	3748.1	4372.39	4729.55	3209.83
25	2170.06	6364.13	3500.8	4091.81
26	5244.67	7043.59	2521.37	5502.38
27	10221.6	5671.31	2777.53	3158.23
28	3284.17	5763.75	4975.04	2716.82
29	5324.14	4555.21	6824.51	2159.14
30	2619.39	6706.88	4051.58	4443.98
31	4235.16	5460.44	2545.28	3720.58
32	4112.12	8510.46	2886.51	4068.8
33	2695.01	3713.62	3268.77	3596.77
34	3517.08	6285.64	2386.56	2547.82
35	2084.69	11136.9	5824.03	3218.01
36	5475.53	5227.07	2895.96	2139.64
37	6431.11	4719.2		2133.06
38	3085.75	5214.7		3243.78
39	6304.18	3927.49		4213.69
40	3963.78	6189.53		4561.49
41	5581.6	7223.52		2395.09
42	3048.18	8322.74
43	4733.86	5247.73
44	3808.53	5578.46
45		4126.57
46		5235.9
47		5896.3
48		6263.3
49		6145.59
50		6502.12
51		5230.4
52		4787.3
53		5395.97
54		4807.6
