# Supplementary material for: NHR-49/PPAR-α and HLH-30/TFEB cooperate for C. elegans host defense via a flavin-containing monooxygenase
Source: eLife. 2021 May 12;10:e62775. doi: 10.7554/eLife.62775 (PMC8139828; doi:10.7554/eLife.62775)
Supplement: Figure 3—source data 1. [file elife-62775-fig3-data1.xlsx]

## Sheet: Sheet1
		Mean fluorescence intensity (A.U.)
Animal #	Wild type_E.coli	Wildtype_S. aureus	hlh-30(tm1978)_E.coli	hlh-30(tm1978)_S. aureus	nhr-49(nr2041)_E.coli	nhr-49(nr2041)_S. aureus
1	1619.89	3938.93	1234.39	1335.51	889.125	954.162
2	1014.39	21817.4	1407.88	1341.31	904.092	1096.58
3	1100.59	10460.4	871.607	1545.07	883.435	772.335
4	1186.36	29082.1	720.253	948.409	782.163	763.763
5	982.415	22958.1	788.588	2012.31	914.932	975.994
6	1216.47	28346.7	1825.54	1240.14	825.889	1075.16
7	1245.95	23738.4	870.331	1458.62	818.621	934.655
8	1259.89	26920.7	712.777	1640.13	758.825	989.747
9	1121.14	29109.4	1142.62	1906.83	849.898	863.543
10	1052.74	28145	1468.92	1419.08	838.84	1004.22
11	1239.3	24400.5	1190.68	1327.63	819.004	905.367
12	1090.47	23049.2	797.496	1445.45	846.434	853.137
13	1295.29	24454.5	997.055	1433.68	911.7	1039.44
14	1218.7	23419.4	1168.28	1383.38	928.195	903.018
15	1150.69	4223.11	1383.85	1539.35	947.979	869.29
16	1049.79	17338.1	1296.61	1558.46	826.446	948.181
17	1035.73	17240.6	1274.11	1567.39	919.232	989.7
18	1037.45	23587	1269.75	1073.12	845.95	909.25
19	1241.42	27052.6	851.216	1154.35	904.242	896.346
20	981.686	27460.4	1067.02	1230.92	951.456	957.73
21	1133.57	2094.23	1348.07	1102.35	854.701	975.647
22	1157.46	24179.6	1054.89	1225.97	908.068	1134.37
23	1005.11	2914.12	572.412	1187.65	803.448	931.895
24	845.223	23366	776.896	1470.78	913.075	1004.18
25	1206.55	27547.2	644.296	940.728	792.598	1064.1
26	748.819	11812.2	840.165	1355.04	758.599	1082.14
27	708.722	12222.8	831.575	1270.09	932.555	818.196
28	795.535	2581.64	880.533	786.198	945.626	960.639
29	625.379	20480.8	747.582	1496.5	784.479	1152.97
30	745.516	11045	719.875	1020.35	914.681	1005.9
31	767.6	9441.02	614.257	1649.33	865.553	928.299
32	893.333	1964.77	836.459	1363.74	805.024	805.407
33	630.818	2594.66	879.526	1136.67	892.349	824.598
34	718.319	7474.73	619.019	1153.74	948.436	717.982
35	665.154	5419.77	768.474	1129.7	874.361	799.664
36	795.48	2646.36	694.178	1343.12	913.326	643.787
37	707.516	9445.44	782.741	891.086	962.016	749.627
38	780.604	2001.81	824.38	1252.04	840.988	846.578
39	765.979	23010.6	930.535	1263.1	782.548	845.09
40	642.372	2901.87	849.94	1048.99	832.422	1021.66
41	735.584	23402.3	816.938	1085.12	898.968	727.725
42	804.151	4192.04	755.543	911.492	863.93	859.005
43	720.642	3569.77	770.994	883.587	719.422	988.209
44	921.97	7102.21	763.978	1175.86	914.204	848.155
45	718.291	20978.7	785.201	1923.13	811.475	968.95
46	836.813	3603.34	692.398	1195.26	857.632	937.943
47	653.209	6576.5	778.478	1200.37	789.677	842.878
48		1671.91	808.591		898.012	883.346
49		2374.81	822.347		691.607	950.759
50		3069.22	1084.82		802.047	916.966
51			796.606		862.11	662.715
52			1019.16		837.735	803.62
53			818.288		795.58	805.335
54			929.195		735.295	1009.78
55			839.581		914.768	754.201
56			776.679		826.372	963.861
57			774.743		799.286	884.94
58			806.205		737.634	715.513
59			890.152		689.477	769.223
60			788.097		854.251	959.772
61			790.483		1006.57	817.29
62			887.398		781.879	691.039
63			889.353		917.496	904.675
64			770.946		974.654	773.402
65			684.421		827.837	909.649
66			915.326		1001.64	877.566
67			709.223		624.34	744.94
68			610.793		805.514	978.917
69					832.225	914.136
70					810.857	974.976
