# Supplementary material for: NHR-49/PPAR-α and HLH-30/TFEB cooperate for C. elegans host defense via a flavin-containing monooxygenase
Source: eLife. 2021 May 12;10:e62775. doi: 10.7554/eLife.62775 (PMC8139828; doi:10.7554/eLife.62775)
Supplement: Figure 3—source data 2. [file elife-62775-fig3-data2.xlsx]

## Sheet: Sheet1
	Mean fluorescence intensity (A.U.)
Animal #	Wildtype_S. aureus	hlh-30(tm1978)_S. aureus	nhr-49(nr2041)_S. aureus
1	10130.7	10752.1	226.565
2	17079.1	16878.1	285.539
3	16373.4	9335.82	199.889
4	6294.96	217.275	230.104
5	8148.44	157.275	191.472
6	926.311	156.695	302.047
7	691.322	212.357	210.91
8	1525.51	318.704	310.082
9	803.124	1694.66	287.666
10	655.508	803.872	205.395
11	6649.21	1844.42	244.68
12	3316.01	216.271	226.058
13	2398.32	496.649	284.851
14	1165.18	240.865	569.95
15	7084.77	214.724	613.921
16	4556.73	629.294	571.086
17	5054.48	286.018	620.124
18	11369.4	9604.69	535.363
19	435.726	4838.39	548.336
20	1640.53	2730.28	547.564
21	3509.88	2147.32	619.914
22	3175.38	2812.75	569.633
23	4132.85	2278.59	593.524
24	23416.5	5712.16	610.895
25	12201.7	1618.78	684.95
26	26729	773.675	598.845
27	10353.2	4836.66	557.043
28	5081.86	6046.22	558.385
29	4229.79	2966.03	621.996
30	22333	3464.29	601.567
31	4403.62	595.522	589.634
32	33454.6	5804.58	554.802
33	26365.3	3994.12	536.365
34	8678.28	2356.62
35	5942.72	655.05
36	24832.2	6333.53
37	24619.6	3626.37
38	18683.9	6665.7
39	6920.77	5795.48
40	4828.12	1686.15
41	16587.4	2222.01
42	46675.8	3603.39
43	18427.3	1739.78
44	3272.08	2580.56
45	7484.91	7901.41
46	17832.6	2088.36
47	2985.9	3873.07
48	24759.7	7533
49	31670.3	7042.97
50	13246.4	1361.25
51	4770.76	2333.54
52	17850.2
53	13977.2
54	13775
