# Supplementary material for: NHR-49/PPAR-α and HLH-30/TFEB cooperate for C. elegans host defense via a flavin-containing monooxygenase
Source: eLife. 2021 May 12;10:e62775. doi: 10.7554/eLife.62775 (PMC8139828; doi:10.7554/eLife.62775)
Supplement: Figure 3—source data 3. [file elife-62775-fig3-data3.xlsx]

## Sheet: Sheet1
	2^(-ΔΔCt) values_For Graph
Wild type_E. coli	Wild type_S. aureus	nhr-49(nr2041)_E. coli	nhr-49(nr2041)_S. aureus	nhr-49(nr2041): pnhr-49::n49::gfp_E. coli	nhr-49(nr2041): pnhr-49::n49::gfp_S. aureus
0.451642	5873.48	0.215237	0.286976	0.34748	524.21
1.0572	3055.09	0.0425706	0.0107092	0.174101	231.682
1.67626	2570.8	0.0874741	0.014368	0.120074	219.488
1.24941	3694.08			0.147317	289.416
		ΔCt values_For Statistics
Wild type_E. coli	Wild type_S. aureus	nhr-49(nr2041)_E. coli	nhr-49(nr2041)_S. aureus	nhr-49(nr2041): pnhr-49::n49::gfp_E. coli	nhr-49(nr2041): pnhr-49::n49::gfp_S. aureus
11.277	-1.243	13.493	13.078	12.802	2.243
10.05	-1.527	13.939	15.93	12.572	2.194
9.385	-1.943	13.324	15.403	12.443	1.607
9.809	-2.042			12.572	1.632
