# Supplementary material for: NHR-49/PPAR-α and HLH-30/TFEB cooperate for C. elegans host defense via a flavin-containing monooxygenase
Source: eLife. 2021 May 12;10:e62775. doi: 10.7554/eLife.62775 (PMC8139828; doi:10.7554/eLife.62775)
Supplement: Figure 4—source data 1. [file elife-62775-fig4-data1.xlsx]

## Sheet: Sheet1
		Survival Proportions
Time(h)	Wild type		nhr-49(nr2041)		nhr-49(nr2041);nhr-49p::nhr-49(cDNA)::gfp
	%	SEM	%	SEM	%	SEM
0	100		100		100
16	99.0741	0.921629	100		100
24	94.946	2.20519	59.7561	5.41545	95.1613	2.7252
40	68.1134	4.72954	2.43902	1.70349	58.0645	6.26687
48	44.3769	5.04527	0	0	40.3226	6.22993
64	12.3843	3.34612			24.1935	5.43885
72	7.22415	2.6299			16.7494	4.87535
88	1.03202	1.02668			9.30521	3.87721
96					0	0
