# Supplementary material for: NHR-49/PPAR-α and HLH-30/TFEB cooperate for C. elegans host defense via a flavin-containing monooxygenase
Source: eLife. 2021 May 12;10:e62775. doi: 10.7554/eLife.62775 (PMC8139828; doi:10.7554/eLife.62775)
Supplement: Figure 4—source data 2. [file elife-62775-fig4-data2.xlsx]

## Sheet: Sheet1
		Survival Proportions
Time (d)	Wild type		nhr-49(nr2041)		nhr-49(nr2041);nhr-49p::nhr-49(cDNA)::gfp
	%	SEM	%	SEM	%	SEM
0	100		100		100
1
2
3
4
5
6			98.0583	1.35963
7	98.9474	1.04708	80.5825	3.89761	98.2609	1.21901
9	88.4211	3.28285	0	0	74.7826	4.0495
10	67.3684	4.81045			34.7826	4.44134
11	50.5263	5.12961			16.5217	3.4631
13	13.6842	3.52609			8.69565	2.62753
14	3.15789	1.79419			0	0
15	0	0
