# Supplementary material for: NHR-49/PPAR-α and HLH-30/TFEB cooperate for C. elegans host defense via a flavin-containing monooxygenase
Source: eLife. 2021 May 12;10:e62775. doi: 10.7554/eLife.62775 (PMC8139828; doi:10.7554/eLife.62775)
Supplement: Figure 4—source data 3. [file elife-62775-fig4-data3.xlsx]

## Sheet: Sheet1
		Survival Proportions
Time(h)	Wild type		nhr-49(et7)		nhr-49(et8)
	%	SEM	%	SEM	%	SEM
0	100		100		100
16	98.9583	1.03623	100		100
23	95.8333	2.03947	100		98.7654	1.22692
39	62.8241	4.98292	91.7647	2.98173	82.716	4.20121
47	40.463	5.06314	80	4.33861	56.7901	5.50409
65	8.51852	2.88049	55.2941	5.39278	32.0988	5.18729
72	4.25926	2.08374	50.028	5.48444	29.6296	5.07359
89	0	0	38.9107	5.49656	16.7472	4.19569
95					12.8824	3.77442
112			32.4256	5.45367	9.01771	3.23508
