# Supplementary material for: NHR-49/PPAR-α and HLH-30/TFEB cooperate for C. elegans host defense via a flavin-containing monooxygenase
Source: eLife. 2021 May 12;10:e62775. doi: 10.7554/eLife.62775 (PMC8139828; doi:10.7554/eLife.62775)
Supplement: Figure 4—source data 4. [file elife-62775-fig4-data4.xlsx]

## Sheet: Sheet1
		Survival Proportions
Time(d)	Wild type		nhr-49(et7)		nhr-49(et8)
	%	SEM	%	SEM	%	SEM
0	100		100		100
1
2
3
4
6					91.0714	2.69447
7	98.8889	1.10492			78.5714	3.87722
8	97.7778	1.55379	98.9583	1.03623	57.1429	4.6761
9	84.4444	3.82038	94.7917	2.26777	28.5714	4.26867
10	62.2222	5.11057	86.4583	3.49224	10.7143	2.92256
13	20	4.21637	43.75	5.06308	0	0
14	6.66667	2.62937	23.9583	4.35631
15	0	0	9.375	2.97491
16			3.125	1.7758
17			0	0
