# Supplementary material for: NHR-49/PPAR-α and HLH-30/TFEB cooperate for C. elegans host defense via a flavin-containing monooxygenase
Source: eLife. 2021 May 12;10:e62775. doi: 10.7554/eLife.62775 (PMC8139828; doi:10.7554/eLife.62775)
Supplement: Figure 4—source data 5. [file elife-62775-fig4-data5.xlsx]

## Sheet: Sheet1
	2^(-ΔΔCt) values_For Graph
Wild type_ E.coli	Wild type_ S. aureus_	nhr-49(et7)_ E.coli	nhr-49(et7)_ S. aureus	nhr-49(et8)_ E.coli	nhr-49(et8)_ S. aureus
2.12756	1256.33	18.5713	2940.81	42.5769	2227.18
1.63376	2380.42	30.5479	3829.66	30.5267	2466.07
0.613953	2495.3			210.985	8017.85
0.720065	2959.22			47.6036	6907.75
0.650761	2104.12
	ΔCt values_For Statistics
Wild type_ E.coli	Wild type_ S. aureus_	nhr-49(et7)_ E.coli	nhr-49(et7)_ S. aureus	nhr-49(et8)_ E.coli	nhr-49(et8)_ S. aureus
8.152	-2.143	3.937	-3.37	2.74	-2.969
8.533	-2.684	3.6	-3.763	3.601	-2.735
9.945	-1.34			2.224	-3.024
9.715	-1.816			4.142	-3.039
9.861	-1.178
