# Supplementary material for: NHR-49/PPAR-α and HLH-30/TFEB cooperate for C. elegans host defense via a flavin-containing monooxygenase
Source: eLife. 2021 May 12;10:e62775. doi: 10.7554/eLife.62775 (PMC8139828; doi:10.7554/eLife.62775)
Supplement: Figure 4—source data 6. [file elife-62775-fig4-data6.xlsx]

## Sheet: Sheet1
	Mean fluorescence intensity (A.U.)
Animal #	Wild type_E.coli	Wild type_S. aureus	nhr-49(et8)_E.coli	nhr-49(et8)_S. aureus
1	864.148	13456.8	2275.74	26515.9
2	911.206	12274.2	2400.62	23935
3	842.194	7456.74	1127.21	10576.5
4	1074.03	11464.6	3621.15	25402.4
5	733.839	2745.11	3766.72	28667.4
6	691.412	5817.06	1874.53	19442.1
7	703.944	14679.3	1668.63	7848.32
8	1011.61	4290.38	2149.78	22384.9
9	897.407	11982.7	1409.19	32235.6
10	735.083	2695.63	1120.96	21378.3
11	752.395	6502.87	3626.78	20661.5
12	740.446	9105.45	1748.06	27331.1
13	941.743	5704.88	1804.05	19246.9
14	1297.36	3603.77	1314.54	24005.5
15	945.235	10634.2	1907.09	15439
16	1285.39	11457.1	1442.45	26314.7
17	886.761	10689.2	14476.1	26571.4
18	734.129	12164	1471.71	18966.7
19	731.993	9739.38	1516.86	27924.1
20	1336.16	2858.79	1957	24890.3
21	974.244	5201.24	7074.71	15563.6
22	937.695	13248.2	2784.67	39065.1
23	763.004	18095.3	3710.53	22117.4
24	978.142	6423.9	6431.69	21788.2
25	1399.24	9709.65	1724.93	19432.7
26	726.578	9218.12	1257.57	12927.9
27	697.56	11129.8	1458	20784.9
28	759.866	4793.67	1759.78	29918.1
29	710.275	10108.3	1366.88	17568.2
30	639.017	11936.8	1911.15	10396.7
31	767.928	11281.8		22533.8
32	737.068	4067.26		12643.2
33	845.619	3073.07		27716.9
34	691.117	5863.37		22904
35	779.982	2437.29		25349.6
36	824.779	6006.14		30076.6
37	691.533	7919.94		25657.3
38	883.446	16593.2		15184.7
39	908.247	16638.9		21647.5
40	1335.61	6582.55		34302.2
41	766.659	13378.9		19056.9
42	1067.86	3042.22		27975
43	818.775	3762.97		32163
44	883.468	11720.3		9941.22
45	854.181	2509.01		26953.6
46	2157.76	4780.4		25279.1
47	861.539	2217.71		37892.5
48	703.701	7821.8		21805.5
49	739.253	18713.4		19924.5
50		17009.2		18113.1
51		25816		23488.3
52		5070.03		32064.4
53		23988.6		21117
54		15210.1
55		16596.9
56		27741.9
57		12965.6
58		8448.63
59		2443.01
60		7420.63
61		8764.54
62		4878.14
63		4976.23
64		3981.89
65		16643.4
66		11862
67		19383.1
68		11749.3
69		12955.4
70		3958.24
71		6617.73
72		12685.8
73		11469.5
74		6668.16
75		12496.7
