# Supplementary material for: NHR-49/PPAR-α and HLH-30/TFEB cooperate for C. elegans host defense via a flavin-containing monooxygenase
Source: eLife. 2021 May 12;10:e62775. doi: 10.7554/eLife.62775 (PMC8139828; doi:10.7554/eLife.62775)
Supplement: Figure 5—source data 1. [file elife-62775-fig5-data1.xlsx]

## Sheet: Sheet1
		2^(-ΔΔCt) values_For Graph
Wild type_E. coli	Wild type_S. aureus	nhr-49(nr2041)_E. coli	nhr-49(nr2041)_S. aureus	nhr-49(nr2041); pgly-19::nhr-49(cDNA)_E.coli	nhr-49(nr2041); pgly-19::nhr-49(cDNA)_S.aureus
1.27515	2908.38	0.215237	0.286976	2.65369	2316.93
2.58769	1096.74	0.0674985	0.0169802	0.685867	277.05
0.335101	5873.48	0.0651993	0.0154313	7.74895	3853.62
0.784403	3055.09			5.6647	1136.99
1.24372	2570.8			0.337978	1215.22
0.927016	3694.08			0.678772	1083.89
		ΔCt values_For Statistics
Wild type_E. coli	Wild type_S. aureus	nhr-49(nr2041)_E. coli	nhr-49(nr2041)_S. aureus	nhr-49(nr2041); pgly-19::nhr-49(cDNA)_E. coli	nhr-49(nr2041); pgly-19::nhr-49(cDNA)_S.aureus
9.349	-2.157	13.493	13.078	7.941	-1.829
8.328	-1.771	13.939	15.93	8.872	0.214
11.277	-1.243	13.324	15.403	8.323	-0.635
10.05	-1.527			7.548	-0.101
9.385	-1.943			10.95	-0.862
9.809	-2.042			10.368	-0.273
