# Supplementary material for: NHR-49/PPAR-α and HLH-30/TFEB cooperate for C. elegans host defense via a flavin-containing monooxygenase
Source: eLife. 2021 May 12;10:e62775. doi: 10.7554/eLife.62775 (PMC8139828; doi:10.7554/eLife.62775)
Supplement: Figure 5—source data 2. [file elife-62775-fig5-data2.xlsx]

## Sheet: Sheet1
		Survival proportions
Time (h)	Wild type		nhr-49(nr2041)		nhr-49(nr2041); pgly-19::nhr-49(cDNA)
	%	SEM	%	SEM	%	SEM
0	100		100		100
14					92.8571	3.44151
24			99.4286	0.569794	87.5	4.41942
38			93.7143	1.83468	85.7143	4.6761
48	94.8718	2.03919	68	3.52623	80.3571	5.3091
62	50.4274	4.62233	26.8571	3.3504	67.8571	6.24088
70	32.4786	4.32939	15.4286	2.73058	62.5	6.46936
87	11.9658	3.00057	8	2.05078	51.7857	6.67727
101	1.7094	1.19835	2.85714	1.25937	26.7857	5.91774
125	0	0	0	0	0	0
