# Supplementary material for: NHR-49/PPAR-α and HLH-30/TFEB cooperate for C. elegans host defense via a flavin-containing monooxygenase
Source: eLife. 2021 May 12;10:e62775. doi: 10.7554/eLife.62775 (PMC8139828; doi:10.7554/eLife.62775)
Supplement: Figure 5—source data 5. [file elife-62775-fig5-data5.xlsx]

## Sheet: Sheet1
		Survival proportions
Time (h)	Wild type		nhr-49(nr2041		nhr-49(nr2041); prgef-1::nhr-49(cDNA)
	%	SEM	%	SEM	%	SEM
0	100		100		100
14
24			99.4286	0.569794
38			93.7143	1.83468	94.2308	3.23336
48	94.8718	2.03919	68	3.52623
62	50.4274	4.62233	26.8571	3.3504	82.6923	5.24627
70	32.4786	4.32939	15.4286	2.73058	65.3846	6.59737
87	11.9658	3.00057	8	2.05078	53.8462	6.91321
101	1.7094	1.19835	2.85714	1.25937	38.4615	6.7466
125	0	0	0	0	0	0
