# Supplementary material for: NHR-49/PPAR-α and HLH-30/TFEB cooperate for C. elegans host defense via a flavin-containing monooxygenase
Source: eLife. 2021 May 12;10:e62775. doi: 10.7554/eLife.62775 (PMC8139828; doi:10.7554/eLife.62775)
Supplement: Figure 5—source data 6. [file elife-62775-fig5-data6.xlsx]

## Sheet: Sheet1
		Survival proportions
Time (d)	Wild type		nhr-49(nr2041)		nhr-49(nr2041); prgef-1::nhr-49(cDNA)
	%	SEM	%	SEM	%	SEM
0	100		100		100
1
2
3
4
5
6			98.0583	1.35963
7	98.9474	1.04708	80.5825	3.89761	98.8636	1.12989
9	88.4211	3.28285	0	0	89.7727	3.23006
10	67.3684	4.81045			62.5	5.16077
11	50.5263	5.12961			43.1818	5.28023
13	13.6842	3.52609			5.68182	2.46774
14	3.15789	1.79419			1.13636	1.12989
15	0	0			0	0
