# Supplementary material for: NHR-49/PPAR-α and HLH-30/TFEB cooperate for C. elegans host defense via a flavin-containing monooxygenase
Source: eLife. 2021 May 12;10:e62775. doi: 10.7554/eLife.62775 (PMC8139828; doi:10.7554/eLife.62775)
Supplement: Figure 5—source data 7. [file elife-62775-fig5-data7.xlsx]

## Sheet: Sheet1
		2^(-ΔΔCt) values_For Graph
Wild type_E. coli	Wild type_S. aureus	nhr-49(nr2041)_E. coli	nhr-49(nr2041)_S. aureus	nhr-49(nr2041) pmyo-3::nhr-49(cDNA)_E. coli	(nhr-49(nr2041);pmyo-3::nhr-49(cDNA)_S.aureus
1.27515	2908.38	0.215237	0.286976	0.183011	152.853
2.58769	1096.74	0.0674985	0.0169802	0.0699758	14.7741
0.335101	5873.48	0.0651993	0.0154313	0.132402	359.787
0.784403	3055.09			0.0543717	320.904
1.24372	2570.8			0.0835046	243.875
0.927016	3694.08
		ΔCt values_For Statistics
Wild type_E. coli	Wild type_S. aureus	nhr-49(nr2041)_E. coli	nhr-49(nr2041)_S. aureus	nhr-49(nr2041) pmyo-3::nhr-49(cDNA)_E. coli	(nhr-49(nr2041) pmyo-3::nhr-49(cDNA)_S.aureus
9.349	-2.157	13.493	13.078	11.799	2.093
8.328	-1.771	13.939	15.93	12.165	4.443
11.277	-1.243	13.324	15.403	14.194	2.786
10.05	-1.527			14.251	1.724
9.385	-1.943			12.967	1.455
9.809	-2.042
