# Supplementary material for: NHR-49/PPAR-α and HLH-30/TFEB cooperate for C. elegans host defense via a flavin-containing monooxygenase
Source: eLife. 2021 May 12;10:e62775. doi: 10.7554/eLife.62775 (PMC8139828; doi:10.7554/eLife.62775)
Supplement: Figure 5—source data 8. [file elife-62775-fig5-data8.xlsx]

## Sheet: Sheet1
		Survival proportions
Time (h)	Wild type		nhr-49(nr2041		nhr-49(nr2041); pmyo-3::nhr-49(cDNA)
	%	SEM	%	SEM	%	SEM
0	100		100		100
14					99.1803	0.816306
24			99.4286	0.569794	98.3607	1.14965
38			93.7143	1.83468	94.2623	2.10551
48	94.8718	2.03919	68	3.52623	87.7049	2.97302
62	50.4274	4.62233	26.8571	3.3504	85.2459	3.2108
70	32.4786	4.32939	15.4286	2.73058	80.3279	3.59898
87	11.9658	3.00057	8	2.05078	62.2951	4.38779
101	1.7094	1.19835	2.85714	1.25937	24.5902	3.89865
125	0	0	0	0	0	0
