# Supplementary material for: NHR-49/PPAR-α and HLH-30/TFEB cooperate for C. elegans host defense via a flavin-containing monooxygenase
Source: eLife. 2021 May 12;10:e62775. doi: 10.7554/eLife.62775 (PMC8139828; doi:10.7554/eLife.62775)
Supplement: Figure 5—source data 9. [file elife-62775-fig5-data9.xlsx]

## Sheet: Sheet1
		Survival proportions
Time (d)	Wild type		nhr-49(nr2041		nhr-49(nr2041); pmyo-3::nhr-49(cDNA)
	%	SEM	%	SEM	%	SEM
0	100		100		100
1
2
3
4
5
6			98.0583	1.35963
7	98.9474	1.04708	80.5825	3.89761	98.1651	1.28549
9	88.4211	3.28285	0	0	69.7248	4.40072
10	67.3684	4.81045			27.5229	4.27794
11	50.5263	5.12961			13.7615	3.29966
13	13.6842	3.52609			0.917431	0.913213
14	3.15789	1.79419			0	0
15	0	0
