# Supplementary material for: NHR-49/PPAR-α and HLH-30/TFEB cooperate for C. elegans host defense via a flavin-containing monooxygenase
Source: eLife. 2021 May 12;10:e62775. doi: 10.7554/eLife.62775 (PMC8139828; doi:10.7554/eLife.62775)
Supplement: Figure 5—source data 10. [file elife-62775-fig5-data10.xlsx]

## Sheet: Sheet1
		2^(-ΔΔCt) values_For Graph
Wild type_E. coli	Wild type_S. aureus	nhr-49(nr2041)_E. coli	nhr-49(nr2041)_S. aureus	nhr-49(nr2041) pcol-12::nhr-49(cDNA)_E. coli	nhr-49(nr2041) pcol-12::nhr-49(cDNA)_S.aureus
0.451642	5873.48	0.215237	0.286976	1.46409	619.517
1.0572	3055.09	0.0674985	0.0169802	0.326918	172.925
1.67626	2570.8	0.0651993	0.0154313	0.0958552	283.853
1.24941	3694.08			0.133508	375.847
		ΔCt values_For Statistics
Wild type_E. coli	Wild type_S. aureus	nhr-49(nr2041)_E. coli	nhr-49(nr2041)_S. aureus	nhr-49(nr2041) pcol-12::nhr-49(cDNA)_E. coli	nhr-49(nr2041) pcol-12::nhr-49(cDNA)_S.aureus
11.277	-1.243	13.493	13.078	10.727	2.002
10.05	-1.527	13.939	15.93	11.663	2.616
9.385	-1.943	13.324	15.403	12.768	1.236
9.809	-2.042			12.714	1.255
