# Supplementary material for: NHR-49/PPAR-α and HLH-30/TFEB cooperate for C. elegans host defense via a flavin-containing monooxygenase
Source: eLife. 2021 May 12;10:e62775. doi: 10.7554/eLife.62775 (PMC8139828; doi:10.7554/eLife.62775)
Supplement: Figure 5—source data 11. [file elife-62775-fig5-data11.xlsx]

## Sheet: Sheet1
		Survival proportions
Time (h)	Wild type		nhr-49(nr2041		nhr-49(nr2041); pcol-12::nhr-49(cDNA)
	%	SEM	%	SEM	%	SEM
0	100		100		100
16	99.0741	0.921629	100		96.25	2.12408
24	94.946	2.20519	59.7561	5.41545	84.0493	4.22889
40	68.1134	4.72954	2.43902	1.70349	65.0704	5.53513
48	44.3769	5.04527	0	0	56.9366	5.75371
64	12.3843	3.34612			24.4014	4.9983
72	7.22415	2.6299			14.912	4.14627
88	1.03202	1.02668			5.42254	2.6365
