# Supplementary material for: NHR-49/PPAR-α and HLH-30/TFEB cooperate for C. elegans host defense via a flavin-containing monooxygenase
Source: eLife. 2021 May 12;10:e62775. doi: 10.7554/eLife.62775 (PMC8139828; doi:10.7554/eLife.62775)
Supplement: Figure 7—figure supplement 1—source data 1. [file elife-62775-fig7-figsupp1-data1.xlsx]

## Sheet: Sheet1
			Survival Proportions
Time (h)	Wild type (L4440 RNAi)		Wild type (hlh-30 RNAi)		nhr-49(nr2041) (L4440 RNAi)		nhr-49(nr2041) (hlh-30 RNAi)
	%	SEM	%	SEM	%	SEM	%	SEM
0	100		100		100		100
17	98.9691	1.0256	90	2.86039	89.4737	2.87431	85.4167	3.60217
24	95.8437	2.03459	74.5455	4.15333	64.9123	4.46981	59.375	5.0126
42	39.5876	4.99132	2.72727	1.55297	8.77193	2.64947	2.08333	1.45771
50	18.752	3.98394	0	0	4.38596	2.03949	0	0
66	7.29246	2.65388			0	0
74	1.04178	1.03634
