# Supplementary material for: NHR-49/PPAR-α and HLH-30/TFEB cooperate for C. elegans host defense via a flavin-containing monooxygenase
Source: eLife. 2021 May 12;10:e62775. doi: 10.7554/eLife.62775 (PMC8139828; doi:10.7554/eLife.62775)
Supplement: Figure 7—figure supplement 1—source data 2. [file elife-62775-fig7-figsupp1-data2.xlsx]

## Sheet: Sheet1
			Survival Proportions
Time (d)	Wild type (L4440 RNAi)		Wild type (hlh-30 RNAi)		nhr-49(nr2041) (L4440 RNAi)		nhr-49(nr2041) (hlh-30 RNAi)
	%	SEM	%	SEM	%	SEM	%	SEM
0	100		100		100		100
1
2
3
4
5	100		100		98.9691	1.0256
6	100		100		93.8144	2.4459	89.5833	3.11776
7	98.4615	1.52658	100		70.1031	4.64832	38.5417	4.9673
8					29.8969	4.64832	10.4167	3.11776
9			90.1639	3.81296	4.12371	2.0189	1.04167	1.03623
10	92.3077	3.30515	54.0984	6.3803	0	0	0	0
11	67.6923	5.80051	16.3934	4.74013
12	36.9231	5.98587	1.63934	1.62585
13	9.23077	3.59031	0	0
14	1.53846	1.52658
15	0	0
