# Supplementary material for: NHR-49/PPAR-α and HLH-30/TFEB cooperate for C. elegans host defense via a flavin-containing monooxygenase
Source: eLife. 2021 May 12;10:e62775. doi: 10.7554/eLife.62775 (PMC8139828; doi:10.7554/eLife.62775)
Supplement: Figure 7—source data 1. [file elife-62775-fig7-data1.xlsx]

## Sheet: Sheet1
	2^(-ΔΔCt) values_For Graph
Wild type_ E.coli	Wild type_ S. aureus	hlh-30(tm1978)_ E.coli	hlh-30(tm1978)_ S. aureus
0.986404	1.06069	1.92786	0.426317
1.06825	1.12818	0.842063	0.51086
0.853966	1.2033	1.32042	0.850274
1.1113	0.885768	0.770571	0.402204
	ΔCt values_For Statistics
Wild type_ E.coli	Wild type_ S. aureus	hlh-30(tm1978)_ E.coli	hlh-30(tm1978)_ S. aureus
1.395	1.31	0.448	2.625
1.28	1.106	1.528	2.249
1.603	1.336	1.202	1.837
1.223	1.398	1.599	2.537
