# Supplementary material for: NHR-49/PPAR-α and HLH-30/TFEB cooperate for C. elegans host defense via a flavin-containing monooxygenase
Source: eLife. 2021 May 12;10:e62775. doi: 10.7554/eLife.62775 (PMC8139828; doi:10.7554/eLife.62775)
Supplement: Figure 7—source data 2. [file elife-62775-fig7-data2.xlsx]

## Sheet: Sheet1
		2^(-ΔΔCt) values_For Graph
Wild type_ E. coli	Wild type_S. aureus	nhr-49 (nr2041)_E.coli	nhr-49 (nr2041)_S. aureus	nhr-49 (et8)_E. coli	nhr-49 (et8)_S. aureus
1.1756	5.48693	1.89737	2.62442	3.21429	8.25061
1.04131	5.9794	1.74836	2.43513	3.45455	13.4264
0.979692	6.04608	1.78633	3.09728	3.09942	11.9547
0.833584	6.28538	1.82134	3.4438
		ΔCt values_For Statistics
Wild type_ E. coli	Wild type_S. aureus	nhr-49 (nr2041)_E.coli	nhr-49 (nr2041)_S. aureus	nhr-49 (et8)_E. coli	nhr-49 (et8)_S. aureus
4.243	1.787	3.319	2.851	2.5585	1.1985
4.418	1.838	3.612	3.134	2.6295	0.671
4.506	1.91	3.669	2.875	2.874	0.926499
4.739	2.087	3.874	2.955
