# Supplementary material for: NHR-49/PPAR-α and HLH-30/TFEB cooperate for C. elegans host defense via a flavin-containing monooxygenase
Source: eLife. 2021 May 12;10:e62775. doi: 10.7554/eLife.62775 (PMC8139828; doi:10.7554/eLife.62775)
Supplement: Figure 7—source data 3. [file elife-62775-fig7-data3.xlsx]

## Sheet: Sheet1
			Survival proportions
Time (h)	Wild type		hlh-30(tm1978)		nhr-49(et7)		nhr-49(et7); hlh-30(tm1978)		nhr-49 (et8)		nhr-49(et8); hlh-30(tm1978)
	%	SEM	%	SEM	%	SEM	%	SEM	%	SEM	%	SEM
0	100		100		100		100		100		100
16	98.9583	1.03623	81.4815	4.31609			87.2093	3.60147			95.7143	2.42076
23	95.8333	2.03947	8.64198	3.12203			18.6047	4.19625	98.7654	1.22692	30	5.47723
39	62.8241	4.98292	0	0	91.7647	2.98173	0	0	82.716	4.20121	0	0
47	40.463	5.06314			80	4.33861			56.7901	5.50409
65	8.51852	2.88049			55.2941	5.39278			32.0988	5.18729
72	4.25926	2.08374			50.028	5.48444			29.6296	5.07359
89	0	0			38.9107	5.49656			16.7472	4.19569
95									12.8824	3.77442
112					32.4256	5.45367			9.01771	3.23508
