# Supplementary material for: NHR-49/PPAR-α and HLH-30/TFEB cooperate for C. elegans host defense via a flavin-containing monooxygenase
Source: eLife. 2021 May 12;10:e62775. doi: 10.7554/eLife.62775 (PMC8139828; doi:10.7554/eLife.62775)
Supplement: Figure 7—source data 4. [file elife-62775-fig7-data4.xlsx]

## Sheet: Sheet1
			Survival proportions
Time (d)	Wild type		hlh-30(tm1978)		nhr-49(et7)		nhr-49(et7); hlh-30(tm1978)		nhr-49(et8)		nhr-49(et8); hlh-30(tm1978)
	%	SEM	%	SEM	%	SEM	%	SEM	%	SEM	%	SEM
0	100		100		100		100		100		100
1
2
3
4			98.6301	1.36045			98.9362	1.05816
6			75.3425	5.04468					91.0714	2.69447	96.9697	1.72283
7	98.8889	1.10492	34.2466	5.55401			93.617	2.5213	78.5714	3.87722	85.8586	3.50204
8	97.7778	1.55379	5.47945	2.66361	98.9583	1.03623	62.766	4.98618	57.1429	4.6761	53.5354	5.01261
9	84.4444	3.82038	4.10959	2.32341	94.7917	2.26777	27.6596	4.6137	28.5714	4.26867	9.09091	2.88928
10	62.2222	5.11057			86.4583	3.49224	4.25532	2.0819	10.7143	2.92256	1.0101	1.00499
13	20	4.21637			43.75	5.06308	0	0	0	0	0	0
14	6.66667	2.62937			23.9583	4.35631
15	0	0			9.375	2.97491
16					3.125	1.7758
17					0	0
