# Supplementary material for: NHR-49/PPAR-α and HLH-30/TFEB cooperate for C. elegans host defense via a flavin-containing monooxygenase
Source: eLife. 2021 May 12;10:e62775. doi: 10.7554/eLife.62775 (PMC8139828; doi:10.7554/eLife.62775)
Supplement: Figure 7—source data 5. [file elife-62775-fig7-data5.xlsx]

## Sheet: Sheet1
				2^(-ΔΔCt) values_For Graph
Wild type_ E.coli	Wild type_ S. aureus	hlh-30(tm1978)_ E.coli	hlh-30(tm1978)_ S. aureus	nhr-49(et7)_ E.coli	nhr-49(et7)_ S. aureus	nhr-49(et7);hlh-30(tm1978)_ E.coli	nhr-49(et7);hlh-30(tm1978)_ S. aureus	nhr-49(et8)_ E.coli	nhr-49(et8)_ S. aureus	nhr-49(et8);hlh-30(tm1978)_ E.coli	nhr-49(et8);hlh-30(tm1978)_ S. aureus
1.11961	1256.33	0.48734	40.8142	18.5713	2940.81	13.2049	395.628	42.5769	2227.18	15.6925	640.032
0.859756	2380.42	0.418994	77.386	30.5479	5028.81	8.91355	521.311	30.5267	2466.07	31.5376	787.972
1.03886	2040.91	0.474671	57.4406	12.458	1900.28	7.83536	329.241	65.6171	2493.58	13.6422	479.039
				ΔCt values_For Statistics
Wild type_ E.coli	Wild type_ S. aureus	hlh-30(tm1978)_ E.coli	hlh-30(tm1978)_ S. aureus	nhr-49(et7)_ E.coli	nhr-49(et7)_ S. aureus	nhr-49(et7);hlh-30(tm1978)_ E.coli	nhr-49(et7);hlh-30(tm1978)_ S. aureus	nhr-49(et8)_ E.coli	nhr-49(et8)_ S. aureus	nhr-49(et8);hlh-30(tm1978)_ E.coli	nhr-49(et8);hlh-30(tm1978)_ S. aureus
8.152	-2.143	9.189	2.801	3.937	-3.37	4.429	-0.476	2.74	-2.969	4.18	-1.17
8.533	-2.684	9.788	2.259	3.6	-3.763	5.377	-0.493	3.601	-2.735	3.554	-1.089
8.26	-2.735	9.335	2.416	4.621	-2.632	5.29	-0.103	2.224	-3.024	4.49	-0.644
