# Supplementary material for: NHR-49/PPAR-α and HLH-30/TFEB cooperate for C. elegans host defense via a flavin-containing monooxygenase
Source: eLife. 2021 May 12;10:e62775. doi: 10.7554/eLife.62775 (PMC8139828; doi:10.7554/eLife.62775)
Supplement: Figure 8—figure supplement 1—source data 1. [file elife-62775-fig8-figsupp1-data1.xlsx]

## Sheet: Sheet1
		H02F09.3
	2^(-ΔΔCt) values_For Graph
Wild type_ E.coli	Wild type_ S. aureus	fmo-2(ok2147)_ E.coli	fmo-2(ok2147)_ S. aureus
0.715984	51.6251	3.24901	78.7932
1.39668	29.2223	1.24272	34.1662
	ΔCt values_For Statistics
Wild type_ E.coli	Wild type_ S. aureus	fmo-2(ok2147)_ E.coli	fmo-2(ok2147)_ S. aureus
9.986	4.296	8.286	3.686
9.022	4.153	8.7085	3.9275
