# Supplementary material for: NHR-49/PPAR-α and HLH-30/TFEB cooperate for C. elegans host defense via a flavin-containing monooxygenase
Source: eLife. 2021 May 12;10:e62775. doi: 10.7554/eLife.62775 (PMC8139828; doi:10.7554/eLife.62775)
Supplement: Figure 8—figure supplement 1—source data 2. [file elife-62775-fig8-figsupp1-data2.xlsx]

## Sheet: Sheet1
	ech-9
	2^(-ΔΔCt) values_For Graph
Wild type_ E.coli	Wild type_ S. aureus	fmo-2(ok2147)_ E.coli	fmo-2(ok2147)_ S. aureus
0.766841	68.6411	2.02581	84.6829
1.30405	40.5604	1.30044	45.3647
	ΔCt values_For Statistics
Wild type_ E.coli	Wild type_ S. aureus	fmo-2(ok2147)_ E.coli	fmo-2(ok2147)_ S. aureus
9.382	3.281	8.3635	2.978
8.616	3.274	8.237	3.1125
