# Supplementary material for: NHR-49/PPAR-α and HLH-30/TFEB cooperate for C. elegans host defense via a flavin-containing monooxygenase
Source: eLife. 2021 May 12;10:e62775. doi: 10.7554/eLife.62775 (PMC8139828; doi:10.7554/eLife.62775)
Supplement: Figure 8—figure supplement 1—source data 3. [file elife-62775-fig8-figsupp1-data3.xlsx]

## Sheet: Sheet1
		Y47H9C.1
	2^(-ΔΔCt) values_For Graph
Wild type_ E.coli	Wild type_ S. aureus	fmo-2(ok2147)_ E.coli	fmo-2(ok2147)_ S. aureus
0.951978	7.83536	0.735348	10.1683
1.05044	11.5274	0.726734	10.1894
	ΔCt values_For Statistics
Wild type_ E.coli	Wild type_ S. aureus	fmo-2(ok2147)_ E.coli	fmo-2(ok2147)_ S. aureus
7.296	4.326	7.7395	3.95
7.154	3.627	7.6145	3.805
