# Supplementary material for: NHR-49/PPAR-α and HLH-30/TFEB cooperate for C. elegans host defense via a flavin-containing monooxygenase
Source: eLife. 2021 May 12;10:e62775. doi: 10.7554/eLife.62775 (PMC8139828; doi:10.7554/eLife.62775)
Supplement: Figure 8—figure supplement 1—source data 4. [file elife-62775-fig8-figsupp1-data4.xlsx]

## Sheet: Sheet1
	C50F7.5
	2^(-ΔΔCt) values_For Graph
Wild type_ E.coli	Wild type_ S. aureus	fmo-2(ok2147)_ E.coli	fmo-2(ok2147)_ S. aureus
1.28209	353.606	2.47856	767.488
0.779975	1621.37	7.44618	1040.82
	ΔCt values_For Statistics
Wild type_ E.coli	Wild type_ S. aureus	fmo-2(ok2147)_ E.coli	fmo-2(ok2147)_ S. aureus
8.51	0.044	7.2005	-1.074
9.227	-1.436	6.3305	-0.796499
