# Supplementary material for: NHR-49/PPAR-α and HLH-30/TFEB cooperate for C. elegans host defense via a flavin-containing monooxygenase
Source: eLife. 2021 May 12;10:e62775. doi: 10.7554/eLife.62775 (PMC8139828; doi:10.7554/eLife.62775)
Supplement: Figure 8—figure supplement 1—source data 5. [file elife-62775-fig8-figsupp1-data5.xlsx]

## Sheet: Sheet1
	clec-52
	2^(-ΔΔCt) values_For Graph
Wild type_ E.coli	Wild type_ S. aureus	fmo-2(ok2147)_ E.coli	fmo-2(ok2147)_ S. aureus
0.875088	57.0834	2.14652	144.758
1.14274	63.0315	1.5632	104.764
	ΔCt values_For Statistics
Wild type_ E.coli	Wild type_ S. aureus	fmo-2(ok2147)_ E.coli	fmo-2(ok2147)_ S. aureus
6.097	0.262	4.995	-1.0805
5.712	-0.266	5.0675	-0.999
