# Supplementary material for: NHR-49/PPAR-α and HLH-30/TFEB cooperate for C. elegans host defense via a flavin-containing monooxygenase
Source: eLife. 2021 May 12;10:e62775. doi: 10.7554/eLife.62775 (PMC8139828; doi:10.7554/eLife.62775)
Supplement: Figure 8—figure supplement 3—source data 1. [file elife-62775-fig8-figsupp3-data1.xlsx]

## Sheet: Sheet1
		Survival Proportions
Time (h)	Wild type		fmo-2(ok2147)		fmo-2(int OE)
	%	SEM	%	SEM	%	SEM
0	100		100		100
16	98.9362	1.05816	94.7917	2.26777	100
24			78.125	4.21923	98.6301	1.36045
40	54.2553	5.1384	15.625	3.70579	75.3425	5.04468
50	18.0851	3.96989	5.20833	2.26777	62.7854	5.68091
68	1.06383	1.05816	0	0	39.0665	5.75206
75	0	0			33.0562	5.59735
90					21.4866	5.06623
98					0	0
