# Supplementary material for: NHR-49/PPAR-α and HLH-30/TFEB cooperate for C. elegans host defense via a flavin-containing monooxygenase
Source: eLife. 2021 May 12;10:e62775. doi: 10.7554/eLife.62775 (PMC8139828; doi:10.7554/eLife.62775)
Supplement: Figure 8—figure supplement 3—source data 2. [file elife-62775-fig8-figsupp3-data2.xlsx]

## Sheet: Sheet1
		Survival Proportions
Time (d)	Wild type		fmo-2(ok2147)		fmo-2(int OE)
	%	SEM	%	SEM	%	SEM
0	100		100		100
1
2
3
5	100				100
6					97.1014	2.01966
7	98.6667	1.32441	97.7011	1.60674	92.7536	3.12105
8	93.3333	2.88033	95.4023	2.24538	91.3043	3.39213
9	77.3333	4.83444	85.0575	3.82216	88.359	3.86958
10	45.3333	5.7483	55.1724	5.3318	78.0505	5.00933
11	34.6667	5.49532	36.7816	5.16984	66.2693	5.72892
12	21.3333	4.73036	12.6437	3.56307	55.9607	6.01858
13	12	3.75233	4.5977	2.24538	39.7616	5.93611
14	6.66667	2.88033	2.29885	1.60674	19.1445	4.77363
15	0	0	0	0	7.36325	3.1692
16					2.9453	2.0517
17					1.47265	1.46175
18					0	0
