# Supplementary material for: NHR-49/PPAR-α and HLH-30/TFEB cooperate for C. elegans host defense via a flavin-containing monooxygenase
Source: eLife. 2021 May 12;10:e62775. doi: 10.7554/eLife.62775 (PMC8139828; doi:10.7554/eLife.62775)
Supplement: Figure 8—source data 1. [file elife-62775-fig8-data1.xlsx]

## Sheet: Sheet1
	Survival Proportions
Time(h)	Wild type		fmo-2(ok2147)
	%	SEM	%	SEM
0	100		100
21			94.9495	2.20088
29	98.9247	1.06947	79.6351	4.0646
45	82.7957	3.91364	33.6918	4.77516
53	69.5484	4.80539	27.566	4.51457
69	56.0874	5.21492	15.3144	3.63863
77	0	0	0	0
