# Supplementary material for: NHR-49/PPAR-α and HLH-30/TFEB cooperate for C. elegans host defense via a flavin-containing monooxygenase
Source: eLife. 2021 May 12;10:e62775. doi: 10.7554/eLife.62775 (PMC8139828; doi:10.7554/eLife.62775)
Supplement: Figure 8—source data 2. [file elife-62775-fig8-data2.xlsx]

## Sheet: Sheet1
	Survival Proportions
Time(h)	Wild type		fmo-2(ok2147)
	%	SEM	%	SEM
0	100		100
21	100
29	98.913	1.08103	98.913	1.08103
45	38.0435	5.06162	45.6522	5.19311
53	8.95141	3.01292	16.3043	3.85132
71	0	0	0	0
