# Supplementary material for: NHR-49/PPAR-α and HLH-30/TFEB cooperate for C. elegans host defense via a flavin-containing monooxygenase
Source: eLife. 2021 May 12;10:e62775. doi: 10.7554/eLife.62775 (PMC8139828; doi:10.7554/eLife.62775)
Supplement: Figure 8—source data 3. [file elife-62775-fig8-data3.xlsx]

## Sheet: Sheet1
	Survival Proportions
Time (d)	Wild type		fmo-2(ok2147)
	%	SEM	%	SEM
0	100		100
1
2
3
5	100
6
7	98.6667	1.32441	97.7011	1.60674
8	93.3333	2.88033	95.4023	2.24538
9	77.3333	4.83444	85.0575	3.82216
10	45.3333	5.7483	55.1724	5.3318
11	34.6667	5.49532	36.7816	5.16984
12	21.3333	4.73036	12.6437	3.56307
13	12	3.75233	4.5977	2.24538
14	6.66667	2.88033	2.29885	1.60674
15	0	0	0	0
