# Supplementary material for: NHR-49/PPAR-α and HLH-30/TFEB cooperate for C. elegans host defense via a flavin-containing monooxygenase
Source: eLife. 2021 May 12;10:e62775. doi: 10.7554/eLife.62775 (PMC8139828; doi:10.7554/eLife.62775)
Supplement: Figure 8—source data 4. [file elife-62775-fig8-data4.xlsx]

## Sheet: Sheet1
			Survival Proportions
Time (h)	Wild type		fmo-2(ok2147)		fmo-2(FAD Mutant)		fmo-2(NADPH Mutant)		fmo-2(FAD+NADPH Mutant)
	%	SEM	%	SEM	%	SEM	%	SEM	%	SEM
0	100		100		100		100		100
19			96.1039	2.20516	98.0769	1.9045	98.6842	1.3071	94.1176	2.85336
27	97.6471	1.64409	66.2338	5.38934	84.6154	5.00341	72.0128	5.18314	70.5882	5.52551
43	67.0588	5.09786	10.3896	3.47723	23.0769	5.84273	29.3385	5.25778	20.5882	4.9034
51	38.8235	5.28604	5.19481	2.74234	13.4615	4.73315	14.6693	4.08562	11.086	3.88257
67	11.7647	3.49464	0	0	6.73077	3.62646	6.66785	2.8808	3.16742	2.194
75	2.35294	1.64409			0	0	0	0	0	0
91	0	0
