# Supplementary material for: NHR-49/PPAR-α and HLH-30/TFEB cooperate for C. elegans host defense via a flavin-containing monooxygenase
Source: eLife. 2021 May 12;10:e62775. doi: 10.7554/eLife.62775 (PMC8139828; doi:10.7554/eLife.62775)
Supplement: Figure 8—source data 5. [file elife-62775-fig8-data5.xlsx]

## Sheet: Sheet1
				Survival Proportions
Time (d)	Wild type		fmo-2(ok2147)		fmo-2(FAD Mutant)		fmo-2(NADPH Mutant)		fmo-2(FAD+NADPH Mutant)
	%	SEM	%	SEM	%	SEM	%	SEM	%	SEM
0	100		100		100		100		100
1
2
3
4
5
6
7	98.0198	1.38628	96.3415	2.07326	98.8095	1.18337	99.0385	0.956905	97.9167	1.45771
8	95.0495	2.15843	90.2439	3.27673	95.2381	2.32357	96.1538	1.88573	92.7083	2.65361
9	86.1386	3.43828	78.0488	4.57094	84.5238	3.94623	85.5769	3.44501	81.25	3.98361
10	67.3267	4.66691	52.439	5.515	61.9048	5.29856	64.4231	4.69449	58.3333	5.03173
11	33.6634	4.70213	25.6098	4.82007	29.7619	4.98858	32.6923	4.59979	22.9167	4.28964
13	7.92079	2.68723	4.87805	2.37879	4.7619	2.32357	8.65385	2.75698	4.16667	2.03947
14	0	0	0	0	0	0	0	0	0	0
