# Supplementary material for: NHR-49/PPAR-α and HLH-30/TFEB cooperate for C. elegans host defense via a flavin-containing monooxygenase
Source: eLife. 2021 May 12;10:e62775. doi: 10.7554/eLife.62775 (PMC8139828; doi:10.7554/eLife.62775)
Supplement: Figure 9—figure supplement 1—source data 1. [file elife-62775-fig9-figsupp1-data1.xlsx]

## Sheet: Sheet1
			Survival Proportions
Time (h)	Wild type (L4440 RNAi)		Wild type (K08C7.4 RNAi)		nhr-49(nr2041) (L4440 RNAi)		nhr-49(nr2041) (K08C7.4 RNAi)		Wild type (hlh-30 RNAi)
	%	SEM	%	SEM	%	SEM	%	SEM	%	SEM
0	100		100		100		100		100
17	98.9691	1.0256			89.4737	2.87431	96.1538	1.88573	90	2.86039
24	95.8437	2.03459	98.9362	1.05816	64.9123	4.46981	77.7001	4.09945	74.5455	4.15333
42	39.5876	4.99132	41.4894	5.08185	8.77193	2.64947	10.6838	3.04427	2.72727	1.55297
50	18.752	3.98394	23.4043	4.36703	4.38596	2.03949	2.91375	1.65756	0	0
66	7.29246	2.65388	10.6383	3.18015	0	0	0	0
74	1.04178	1.03634	0	0
