# Supplementary material for: NHR-49/PPAR-α and HLH-30/TFEB cooperate for C. elegans host defense via a flavin-containing monooxygenase
Source: eLife. 2021 May 12;10:e62775. doi: 10.7554/eLife.62775 (PMC8139828; doi:10.7554/eLife.62775)
Supplement: Figure 9—figure supplement 1—source data 2. [file elife-62775-fig9-figsupp1-data2.xlsx]

## Sheet: Sheet1
			Survival Proportions
Time (h)	Wild type (L4440 RNAi)		Wild type (K08C7.4 RNAi)		nhr-49(et7) (L4440 RNAi)		nhr-49(et7) (K08C7.4RNAi)		nhr-49(et8) (L4440 RNAi)		nhr-49(et8) (K08C7.4 RNAi)		Wild type (hlh-30 RNAi)
	%	SEM	%	SEM	%	SEM	%	SEM	%	SEM	%	SEM	%	SEM
0	100		100		100		100		100		100		100
18	100		100		98.913	1.08103			98.1818	1.27391	98.3333	1.16865	100
26	100		97.8022	1.53691	96.7391	1.85171	99.0566	0.938936	96.3466	1.7931	94.0948	2.16533	96.8085	1.81297
41	71.2329	5.29818	76.9231	4.41669	85.8696	3.63165	80.1887	3.87133	80.7477	3.7755	78.8362	3.75879	51.0638	5.15594
49	49.3151	5.85151	65.9341	4.96815	71.7391	4.69437	63.2075	4.68394	66.9839	4.50398	67.8161	4.30007	15.9574	3.77718
67	17.8082	4.47778	18.6813	4.08581	48.913	5.21163	37.7358	4.70807	35.7859	4.59171	35.6034	4.40823	3.19149	1.81297
74	9.58904	3.44617	9.89011	3.12944	41.3043	5.13342	26.4151	4.28221	23.8573	4.0826	28.8218	4.16995	0	0
90	0	0	0	0	26.087	4.57803	16.0377	3.56419	8.25828	2.63663	14.4109	3.23345
98					22.8261	4.3758	13.2075	3.28851	3.67035	1.80117	10.1724	2.78312
114					0	0	0	0	0	0	0	0
