# Supplementary material for: NHR-49/PPAR-α and HLH-30/TFEB cooperate for C. elegans host defense via a flavin-containing monooxygenase
Source: eLife. 2021 May 12;10:e62775. doi: 10.7554/eLife.62775 (PMC8139828; doi:10.7554/eLife.62775)
Supplement: Figure 9—source data 1. [file elife-62775-fig9-data1.xlsx]

## Sheet: Sheet1
			Survival proportions
Time (h)	Wild type		fmo-2(ok2147)		nhr-49(nr2041)		nhr-49 (nr2041); fmo-2(ok2147)
	%	SEM	%	SEM	%	SEM	%	SEM
0	100		100		100		100
16	98.9474	1.04708	94.7917	2.26777	95.1807	2.35086	95.2381	2.32357
24	98.9474		78.125	4.21923	71.0843	4.97639	73.8095	4.7972
40	54.2615	5.13829	15.625	3.70579	7.22892	2.84252	11.9048	3.53343
50	18.0872	3.97024	5.20833	2.26777	1.20482	1.19754	2.97619	2.02533
68	1.06395	1.05827	0	0	0	0	0	0
75	0	0
