# Supplementary material for: NHR-49/PPAR-α and HLH-30/TFEB cooperate for C. elegans host defense via a flavin-containing monooxygenase
Source: eLife. 2021 May 12;10:e62775. doi: 10.7554/eLife.62775 (PMC8139828; doi:10.7554/eLife.62775)
Supplement: Figure 9—source data 2. [file elife-62775-fig9-data2.xlsx]

## Sheet: Sheet1
			Survival proportions
Time (d)	Wild type		fmo-2(ok2147)		nhr-49(nr2041)		nhr-49(nr2041); fmo-2(ok2147)
	%	SEM	%	SEM	%	SEM	%	SEM
0	100		100		100		100
1
2
3
4
5	100		100		89.8876	3.19581	91.1111	2.99977
6					58.427	5.22417	71.1111	4.77763
7	84.1584	3.63318	93.4783	2.5742	19.1011	4.16683	41.1111	5.18651
8	75.2475	4.29432	84.7826	3.74481	4.49438	2.19611	16.6667	3.92837
11	42.5743	4.92001	39.1304	5.08819	0	0	0	0
12	24.7525	4.29432	25	4.51447
13	8.91089	2.83487	15.2174	3.74481
14	1.9802	1.38628	6.52174	2.5742
15	0	0	0	0
