# Supplementary material for: NHR-49/PPAR-α and HLH-30/TFEB cooperate for C. elegans host defense via a flavin-containing monooxygenase
Source: eLife. 2021 May 12;10:e62775. doi: 10.7554/eLife.62775 (PMC8139828; doi:10.7554/eLife.62775)
Supplement: Figure 9—source data 3. [file elife-62775-fig9-data3.xlsx]

## Sheet: Sheet1
				Survival proportions
Time (h)	Wild type		fmo-2(ok2147)		nhr-49(et7)		nhr-49(et8)		fmo-2(ok2147); nhr-49(et7)		fmo-2(ok2147); nhr-49(et8)
	%	SEM	%	SEM	%	SEM	%	SEM	%	SEM	%	SEM
0	100		100		100		100		100		100
6
22	100		100		100		100		100		95.3846	2.60247
30	93.5065	2.80812	83.9286	4.90781			96.3415	2.07326	87.6923	4.07486	83.6707	4.73354
48	59.7403	5.58887	7.14286	3.44151	74.1935	5.55714	68.2927	5.13878	27.6923	5.55028	20.4908	5.26919
56	28.5714	5.14821	3.57143	2.47988	59.6774	6.22993	46.3415	5.50678	12.3077	4.07486	5.5884	3.1042
71	1.2987	1.29024	0	0	22.5806	5.31003	8.53659	3.08574	0	0	0	0
79	0	0			9.67742	3.75476	0	0
95					0	0
