# Supplementary material for: NHR-49/PPAR-α and HLH-30/TFEB cooperate for C. elegans host defense via a flavin-containing monooxygenase
Source: eLife. 2021 May 12;10:e62775. doi: 10.7554/eLife.62775 (PMC8139828; doi:10.7554/eLife.62775)
Supplement: Figure 9—source data 4. [file elife-62775-fig9-data4.xlsx]

## Sheet: Sheet1
				Survival proportions
Time (d)	Wild type		fmo-2(ok2147)		nhr-49(et7)		nhr-49(et8)		fmo-2(ok2147); nhr-49(et7)		fmo-2(ok2147); nhr-49(et8)
	%	SEM	%	SEM	%	SEM	%	SEM	%	SEM	%	SEM
0	100		100		100		100		100		100
1
2
3
4
5	98.913	1.08103
6
7	97.8261	1.52039	94.6429	3.00896			95.3704	2.02194	98.0769	1.9045	96.3636	2.52411
8	96.7391	1.85171	92.8571	3.44151	98.8372	1.15601	92.5926	2.52005	96.1538	2.66683	85.4545	4.7539
9	85.8696	3.63165	83.9286	4.90781			87.037	3.23216	88.4615	4.43047	74.5455	5.8737
10	73.913	4.57803	67.8571	6.24088			63.8889	4.62191	76.9231	5.84273	45.4545	6.71408
11	56.5217	5.16833	48.2143	6.67727	88.3721	3.45668	36.1111	4.62191	55.7692	6.88744	29.0909	6.12418
12	35.8696	5.00036	30.3571	6.14433	69.7674	4.95239	17.5926	3.66384	26.9231	6.15107	5.45455	3.06209
13	13.0435	3.51119	12.5	4.41942	41.8605	5.31972	0	0	7.69231	3.69527	0	0
14	0	0	0	0	17.4419	4.09192			3.84615	2.66683
15					0	0			0	0
