# Supplementary material for: NHR-49/PPAR-α and HLH-30/TFEB cooperate for C. elegans host defense via a flavin-containing monooxygenase
Source: eLife. 2021 May 12;10:e62775. doi: 10.7554/eLife.62775 (PMC8139828; doi:10.7554/eLife.62775)
Supplement: Supplementary file 1. [file elife-62775-supp1.xlsx]

## Sheet: up+down_WT_Starv_v_Saur
Differentially expressed genes between wild type C. elegans subjected to fasting (reference condition) or S. aureus infection (experimental condition).
ID	Gene	Annotation	counts.NSn1	counts.NSn2	counts.NSn3	counts.NSn4	counts.NSh1	counts.NSh2	counts.NSh3	counts.NSh4	padj	log2FoldChange	pvalue	foldChange	log10padj
WBGene00019146	H02F09.3	hypothetical protein(H02F09.3)	53.6176	97.4473	21.4681	21.2777	1123.17	1296.14	1017.91	1824.67	1.02901e-20	4.8055	2.29399e-24	27.9641	19.9876
WBGene00021581	clec-70	C-type LECtin(clec-70)	2.7474	0.521819	0.76723	3.54102	7.47691	10.9317	32.1081	158.71	0.00320319	4.78427	8.29109e-05	27.5555	2.49442
WBGene00013840	fbxa-151	F-box A protein(fbxa-151)	0	10.9134	0	4.83639	112.029	69.1001	34.7993	31.9734	0.00248361	4.18341	5.97972e-05	18.1691	2.60492
WBGene00001158	ech-9	Enoyl-CoA Hydratase(ech-9)	145.633	193.741	33.9215	50.3873	1700.31	2743.74	611.959	806.476	1.58852e-07	3.81647	6.49244e-10	14.0887	6.79901
WBGene00014046	clec-60	C-type LECtin(clec-60)	13.2533	10.4978	49.8779	29.7367	188.241	239.785	295.273	501.434	2.4593e-08	3.58523	8.04111e-11	12.0022	7.60919
WBGene00012947	Y47H9C.1	hypothetical protein(Y47H9C.1)	28.6389	29.5354	27.154	26.9241	415.447	282.283	217.262	123.652	1.81119e-13	3.23643	2.28805e-16	9.4246	12.742
WBGene00013900	ugt-18	UDP-glucuronosyltransferase(ugt-18)	129.584	225.601	43.2156	28.7834	908.577	1447.33	367.659	609.046	0.000243324	2.98997	3.20044e-06	7.94458	3.61382
WBGene00045416	Y37H2A.14	hypothetical protein(Y37H2A.14)	283.423	381.476	78.2223	83.2644	2234.69	3426.18	429.664	347.884	0.0036325	2.97932	9.98756e-05	7.88614	2.43979
WBGene00021335	spp-23	SaPosin-like Protein family(spp-23)	22.9989	15.2575	17.8115	6.66541	77.8591	121.284	96.2627	179.892	3.30313e-08	2.95601	1.12911e-10	7.75977	7.48107
WBGene00007682	C18D11.6	hypothetical protein(C18D11.6)	41.2072	21.0944	9.19801	5.34686	253.265	185.649	74.058	55.5206	0.00202026	2.91751	4.69394e-05	7.55542	2.69459
WBGene00005188	srg-31	Serpentine receptor class gamma-31(srg-31)	10.4359	6.65382	9.26153	6.34093	68.7274	70.2294	51.5175	53.8534	4.23668e-12	2.91722	6.61145e-15	7.55391	11.373
WBGene00021519	Y41D4B.17	hypothetical protein(Y41D4B.17)	34.7796	72.1206	21.4728	22.6818	339.924	397.077	146.717	159.619	3.59302e-06	2.82623	2.30648e-08	7.09218	5.44454
WBGene00017378	F11C7.6	hypothetical protein(F11C7.6)	24.8052	19.9798	32.6616	30.7144	130.663	150.846	201.986	243.083	2.90572e-15	2.77492	2.59112e-18	6.8444	14.5367
WBGene00022040	Y65B4BR.1	hypothetical protein(Y65B4BR.1)	126.724	115.133	68.7715	44.7504	379.655	323.685	890.985	666.908	2.14506e-07	2.70375	9.15671e-10	6.51492	6.66856
WBGene00016845	C50F7.5	hypothetical protein(C50F7.5)	2862.12	1619.62	1654.7	1307.53	10845.3	11331	11128.9	13110.1	1.76506e-23	2.66604	2.62326e-27	6.34684	22.7532
WBGene00008486	ugt-44	UDP-GlucuronosylTransferase(ugt-44)	326.684	604.893	159.595	168.761	2555.92	3842.32	600.807	682.618	0.00197151	2.62709	4.55628e-05	6.17779	2.7052
WBGene00016425	C34H4.2	hypothetical protein(C34H4.2)	463.211	1003.18	221.101	234.529	4142.67	5143.7	1031.83	963.577	0.00293706	2.57501	7.33337e-05	5.95877	2.53209
WBGene00009431	dct-17	DAF-16/FOXO Controlled, germline Tumor affecting(dct-17)	93.0537	156.612	67.8251	69.1856	457.994	507.615	472.524	776.392	3.44176e-12	2.55365	5.1152e-15	5.87118	11.4632
WBGene00013073	hmit-1.1	H(+) MyoInositol coTransporter(hmit-1.1)	116.109	181.897	658.36	628.3	985.508	1454.31	3239.56	3394.4	0.00152752	2.54378	3.16695e-05	5.83115	2.81601
WBGene00011494	T05F1.9	hypothetical protein(T05F1.9)	12.3647	13.9065	5.61218	11.2602	78.6741	113.163	27.3304	19.9667	0.00543776	2.50557	0.000176914	5.67873	2.26458
WBGene00001477	fmo-2	Dimethylaniline monooxygenase [N-oxide-forming](fmo-2)	5204.26	10023	1204.27	1299.07	29156.3	30855.6	17751.3	12682.9	0.00521209	2.37942	0.000165383	5.20329	2.28299
WBGene00002021	hsp-17	Heat Shock Protein(hsp-17)	603.948	1034.77	271.549	272.735	3608.98	5152.49	904.269	1149.33	0.0049925	2.32945	0.000155076	5.02613	2.30168
WBGene00019273	H43E16.1	hypothetical protein(H43E16.1)	85.4474	129.296	164.169	161.316	668.995	791.462	444.13	668.422	2.32613e-14	2.28015	2.41999e-17	4.8573	13.6334
WBGene00010899	M28.8	hypothetical protein(M28.8)	283.448	396.702	159.608	165.959	1263.21	1547.65	675.278	858.366	1.57871e-06	2.13627	8.68131e-09	4.39624	5.8017
WBGene00044660	fbxa-87	pseudo	49.8119	86.2417	40.4162	43.859	316.411	373.958	117.905	118.847	0.000679321	2.09836	1.11563e-05	4.28221	3.16792
WBGene00012664	Y39B6A.1	hypothetical protein(Y39B6A.1)	2265	2095.32	6615.13	6443.41	7583.06	10105.6	16374.4	37664.4	0.0078417	2.07125	0.000283786	4.20252	2.10559
WBGene00003571	ncx-6	Putative sodium/calcium exchanger 6(ncx-6)	54.544	84.2711	36.2972	25.1596	221.434	379.877	111.492	103.197	0.00422487	2.0589	0.000122128	4.1667	2.37419
WBGene00010647	K08C7.4	hypothetical protein(K08C7.4)	19.0992	17.3116	17.7899	15.7485	43.9352	70.4187	97.8169	64.3915	3.59302e-06	2.00816	2.33089e-08	4.02268	5.44454
WBGene00005657	srr-6	Serpentine Receptor, class R(srr-6)	73.0056	38.8346	20.5516	19.4301	109.769	116.671	225.328	134.412	0.00277733	1.9777	6.89327e-05	3.93864	2.55637
WBGene00019546	glct-6	GLuCuronosylTransferase-like(glct-6)	200.746	276.736	230.623	233.659	927.561	1139.58	780.817	762.495	5.88047e-26	1.96293	4.36982e-30	3.89854	25.2306
WBGene00009902	drd-1	dietary restriction down regulated(drd-1)	67.0999	107.846	113.328	96.4978	556.864	601.101	136.959	154.272	0.00634046	1.93188	0.000217207	3.81552	2.19788
WBGene00008234	C50F4.9	hypothetical protein(C50F4.9)	226.774	263.336	82.9649	90.7987	762.082	899.196	333.887	342.306	0.00578138	1.83979	0.00019161	3.57959	2.23797
WBGene00018398	sptl-2	Serine palmitoyltransferase 2(sptl-2)	179.604	339.388	161.532	150.951	774.806	1170.2	414.418	473.728	0.00047982	1.791	7.30944e-06	3.46054	3.31892
WBGene00001468	flr-4	Serine/threonine-protein kinase flr-4(flr-4)	25.792	51.5941	29.1106	31.7046	151.278	164.312	75.0233	75.7555	0.000505223	1.7838	7.84659e-06	3.44333	3.29652
WBGene00018343	F42A10.7	hypothetical protein(F42A10.7)	123.807	210.269	366.035	324.869	717.475	908.389	702.02	1124.32	4.52223e-05	1.77535	4.40226e-07	3.42321	4.34465
WBGene00021028	W04C9.6	hypothetical protein(W04C9.6)	9.48318	15.944	16.9011	13.9192	43.8064	35.3008	38.5763	66.502	0.000688353	1.74253	1.13558e-05	3.34621	3.16219
WBGene00004058	pmp-1	Peroxisomal Membrane Protein related(pmp-1)	318.818	493.22	253.351	280.747	1143.04	1683.11	588.387	871.211	9.49768e-05	1.69365	1.0373e-06	3.23473	4.02238
WBGene00022644	dod-19	Downstream Of DAF-16 (regulated by DAF-16)(dod-19)	3753.58	4475.24	2389.91	2388.95	14768.3	16003.3	5453.3	5084.54	0.0024538	1.68767	5.88969e-05	3.22137	2.61016
WBGene00018725	kreg-1	Protein kreg-1(kreg-1)	197.06	91.2649	70.6924	70.1559	450.379	162.011	418.913	320.458	0.00668092	1.68649	0.000231352	3.21873	2.17516
WBGene00021603	clec-204	C-type LECtin(clec-204)	22.2367	60.6279	41.29	25.4108	107.17	170.911	88.4893	92.5445	0.00171074	1.66241	3.75868e-05	3.16546	2.76682
WBGene00021518	hpo-6	hypothetical protein(hpo-6)	883.441	1098.19	533.401	571.884	2750.79	3113.75	1777.95	1941.94	1.52165e-06	1.65948	8.1414e-09	3.15903	5.81769
WBGene00010475	K01F9.2	hypothetical protein(K01F9.2)	236.345	369.165	194.656	216.75	989.135	1339.51	388.679	411.304	0.00497968	1.64118	0.000153938	3.11922	2.3028
WBGene00015052	clec-52	C-type LECtin(clec-52)	556.505	512.323	797.792	686.176	1012.69	861.778	2456.7	3453.89	0.00692099	1.64088	0.000241723	3.11855	2.15983
WBGene00018715	F52H2.3	hypothetical protein(F52H2.3)	27.6931	57.7333	65.1331	55.2184	130.661	176.4	135.642	185.367	9.60283e-06	1.63595	7.13594e-08	3.10792	5.0176
WBGene00011596	T07G12.5	hypothetical protein(T07G12.5)	276.711	555.735	281.719	319.177	1316.56	1666.54	542.419	613.672	0.00503264	1.55138	0.000157071	2.93098	2.2982
WBGene00018907	F55G1.15	hypothetical protein(F55G1.15)	157.563	145.74	102.894	95.5467	338.753	439.914	246.142	419.354	8.77698e-07	1.5513	4.43512e-09	2.93082	6.05665
WBGene00018707	oac-31	O-ACyltransferase homolog(oac-31)	127.762	130.173	79.2366	67.3495	209.186	188.657	326.304	428.189	0.00122465	1.54364	2.45712e-05	2.9153	2.91199
WBGene00010851	M04C3.2	hypothetical protein(M04C3.2)	70.893	65.0319	43.9973	38.3651	139.104	201.04	95.7746	181.326	0.000298713	1.53456	4.15633e-06	2.89701	3.52475
WBGene00013901	ugt-16	UDP-glucuronosyltransferase(ugt-16)	37.3833	32.7456	26.2852	38.3493	86.6997	122.716	83.4647	86.4157	7.44062e-07	1.51453	3.70455e-09	2.85705	6.12839
WBGene00016769	C49C8.5	hypothetical protein(C49C8.5)	1398.79	1389.77	1350.09	1239.97	2487.56	3121.84	3772.07	5637.19	4.71135e-07	1.51042	2.20566e-09	2.84893	6.32685
WBGene00007807	C29F3.7	hypothetical protein(C29F3.7)	1606.49	2143.26	892.983	978.727	4883.62	5174.67	3156.04	1749.94	0.0074132	1.43594	0.000264974	2.70558	2.12999
WBGene00014137	clec-187	C-type LECtin(clec-187)	114.246	203.681	117.104	115.304	359.648	405.75	304.879	365.545	2.14506e-07	1.41437	9.24526e-10	2.66543	6.66856
WBGene00022413	Y102A11A.3	hypothetical protein(Y102A11A.3)	494.006	709.467	700.035	728.9	1519.8	1901.91	1409.26	2055.32	1.92144e-11	1.41255	3.85517e-14	2.66207	10.7164
WBGene00022887	ZK1290.5	Uncharacterized oxidoreductase ZK1290.5(ZK1290.5)	71.9341	104.108	104.855	109.74	289.475	245.173	200.493	278.323	1.46173e-08	1.40205	4.56212e-11	2.64276	7.83513
WBGene00016260	rege-1	hypothetical protein(C30F12.1)	161.326	233.899	362.306	279.78	533.432	664.186	606.901	886.449	9.49768e-05	1.39996	1.0375e-06	2.63895	4.02238
WBGene00016929	C54F6.12	hypothetical protein(C54F6.12)	18.1263	26.6849	26.3441	32.7638	63.6904	57.7597	78.2127	68.2248	9.80118e-05	1.39373	1.08522e-06	2.62756	4.00872
WBGene00009429	irg-5	hypothetical protein(F35E12.5)	345.132	270.465	117.047	142.511	467.495	559.129	502.6	654.296	0.00491577	1.34771	0.000150316	2.54507	2.30841
WBGene00011798	T16G1.4	hypothetical protein(T16G1.4)	169.041	294.148	195.653	226.223	639.874	779.452	349.462	397.975	0.0010251	1.31445	1.91202e-05	2.48707	2.98923
WBGene00022645	ZK6.11	hypothetical protein(ZK6.11)	1538	2574.56	3960.07	3538.37	6143.86	7918.7	5170.66	9060.06	0.00156746	1.30826	3.27306e-05	2.47643	2.8048
WBGene00004020	pho-1	Intestinal acid phosphatase(pho-1)	329.398	607.274	489.955	527.599	1380.43	1761.61	674.818	906.438	0.00265572	1.29524	6.55197e-05	2.45419	2.57582
WBGene00010897	lact-3	beta-LACTamase domain containing(lact-3)	1009.41	1341.8	824.901	771.111	2703.78	3231.68	1571	2010.01	0.000117907	1.29305	1.34055e-06	2.45046	3.92846
WBGene00008799	F14E5.1	hypothetical protein(F14E5.1)	23.9243	26.6512	26.3541	28.0416	79.2349	77.8455	40.2006	53.7595	0.00358835	1.28102	9.83949e-05	2.4301	2.44511
WBGene00019411	K05F1.10	hypothetical protein(K05F1.10)	163.294	144.739	229.813	213.113	386.941	556.745	396.417	406.71	1.38174e-06	1.23657	7.29017e-09	2.35638	5.85957
WBGene00003093	lys-4	LYSozyme(lys-4)	3653.92	7792.86	5980.42	6539.62	12622.6	15457.7	10428.9	15901.9	9.39569e-05	1.20889	1.00523e-06	2.3116	4.02707
WBGene00004859	sma-5	Mitogen-activated protein kinase sma-5(sma-5)	701.742	1002.73	532.5	541.863	1861.68	2209.21	1045.78	1159.36	0.00350201	1.19931	9.4466e-05	2.29629	2.45568
WBGene00006454	aex-4	hypothetical protein(aex-4)	101.768	150.216	108.627	112.541	296.841	397.922	174.696	190.825	0.0041655	1.18626	0.000119173	2.27562	2.38033
WBGene00021352	Y37E3.11	hypothetical protein(Y37E3.11)	1434.37	1688.04	1439.06	1501.23	3429.86	4499.62	2505.29	3145.43	7.46441e-09	1.18576	2.17465e-11	2.27484	8.127
WBGene00044488	Y54G2A.45	hypothetical protein(Y54G2A.45)	117.122	184.874	175.838	198.103	352.396	281.855	297.448	567.196	0.00320319	1.17919	8.28778e-05	2.2645	2.49442
WBGene00007890	C33A12.19	hypothetical protein(C33A12.19)	372.004	252.907	286.521	299.735	702.755	546.518	884.26	560.077	9.76281e-06	1.17912	7.32737e-08	2.26438	5.01042
WBGene00004875	smd-1	S-adenosylmethionine decarboxylase beta chain(smd-1)	968.038	1485.71	1196.84	1068.07	2836.69	3227.56	2030.45	2291.95	4.26204e-07	1.16223	1.93196e-09	2.23803	6.37038
WBGene00000983	dhs-20	DeHydrogenases, Short chain(dhs-20)	131.89	136.244	144.895	169.718	378.864	272.12	304.155	323.279	6.08694e-09	1.16055	1.6736e-11	2.23542	8.2156
WBGene00002058	ifd-2	Intermediate filament protein ifd-2(ifd-2)	536.359	556.039	599.761	602.081	1566.66	1442.15	988.269	1017.48	7.09767e-08	1.1507	2.53168e-10	2.22021	7.14888
WBGene00017964	F31F7.1	hypothetical protein(F31F7.1)	649.812	683.272	743.6	721.403	1399.51	1276.35	1700.55	1670.69	8.34349e-14	1.13891	9.92018e-17	2.20215	13.0787
WBGene00008553	F07C6.2	hypothetical protein(F07C6.2)	69.0512	115.859	115.301	124.831	211.197	233.385	196.861	270.664	0.000125362	1.12826	1.49052e-06	2.18595	3.90183
WBGene00194658	R09E10.13	hypothetical protein(R09E10.13)	28.7425	44.1272	23.4828	26.1304	65.7791	57.7763	76.3279	60.4905	0.00365296	1.12557	0.000100709	2.18187	2.43736
WBGene00017703	F22E5.1	hypothetical protein(F22E5.1)	28.3422	21.4327	30.8305	38.586	65.4742	70.7894	64.4301	49.903	0.00469524	1.10498	0.000139214	2.15096	2.32834
WBGene00018797	F54D7.2	hypothetical protein(F54D7.2)	2002.59	3013.79	2242.45	2392.91	5566.91	6591.72	3466.88	4549.29	6.23087e-05	1.0869	6.34339e-07	2.12417	4.20545
WBGene00001149	bcat-1	Branched-chain-amino-acid aminotransferase, cytosolic(bcat-1)	4202.46	5766.75	4073.46	4140.51	10862.1	12965.3	5906.21	7898.82	0.00105363	1.07168	1.99654e-05	2.10187	2.97731
WBGene00008301	pals-39	DAF-16/FOXO Controlled, germline Tumor affecting(dct-3)	78.7375	81.3495	79.3441	67.4471	214.093	155.208	146.586	116.026	0.000608888	1.06769	9.86383e-06	2.09608	3.21546
WBGene00018594	aman-3	Alpha-mannosidase(aman-3)	163.31	266.509	166.351	153.857	430.743	502.095	290.991	289.607	0.00467841	1.03794	0.00013802	2.05329	2.3299
WBGene00008923	F17C11.12	hypothetical protein(F17C11.12)	246.957	331.002	286.559	278.868	610.702	759.291	394.306	490.077	0.000448741	1.00117	6.76929e-06	2.00163	3.348
WBGene00008368	D1053.3	hypothetical protein(D1053.3)	186.433	216.714	149.319	135.061	387.856	417.534	277.314	267.561	0.000916398	0.999131	1.67522e-05	1.9988	3.03792
WBGene00000067	act-5	ACTin(act-5)	3216.08	3569.49	2685.46	2295.36	6011.23	6298.35	4063.77	6270.18	8.43642e-05	0.970236	8.83953e-07	1.95916	4.07384
WBGene00011830	cyp-29A2	CYtochrome P450 family(cyp-29A2)	123.861	183.662	203.333	224.474	362.822	287.18	389.271	339.575	0.00151504	0.934112	3.12983e-05	1.91071	2.81958
WBGene00003730	nhx-2	Na(+)/H(+) exchanger protein 2(nhx-2)	650.752	951.825	978.318	960.11	1472.79	2049.8	1190.36	1913.3	0.00118178	0.927322	2.34477e-05	1.90174	2.92746
WBGene00019895	aagr-2	Acid Alpha Glucosidase Relate(aagr-2)	4319.76	7858.12	4451.03	4170.56	9518	10520	7837.04	10826.6	0.00293929	0.923754	7.41159e-05	1.89705	2.53176
WBGene00019779	endu-2	hypothetical protein(M60.2)	7056.11	11030	8427.27	8800.88	14265.1	14979.7	17426.6	18915.3	5.55236e-06	0.92159	3.9197e-08	1.8942	5.25552
WBGene00010339	acl-1	Putative 1-acyl-sn-glycerol-3-phosphate acyltransferase acl-1(acl-1)	549.819	662.915	715.254	713.944	1053.33	1191.59	1253.85	1351.33	9.63579e-09	0.902345	2.93577e-11	1.8691	8.01611
WBGene00020740	T23F4.2	hypothetical protein(T23F4.2)	469.1	518.865	448.376	398.172	800.134	995.264	729.361	819.041	7.46441e-09	0.890877	2.21874e-11	1.8543	8.127
WBGene00017422	F13C5.1	hypothetical protein(F13C5.1)	110.439	117.141	134.239	165.304	240.472	243.089	206.877	266.755	0.000186025	0.883661	2.3362e-06	1.84505	3.73043
WBGene00016335	gba-1	Putative glucosylceramidase 1(gba-1)	1505.54	2466.34	1397.43	1386.59	3127.58	3556.75	2412.88	3082.15	0.00315054	0.876907	8.10051e-05	1.83643	2.50162
WBGene00009237	F28H7.3	hypothetical protein(F28H7.3)	1026.7	1580.77	1351.12	1460.91	2418.37	3272.56	1627.67	2418.56	0.00491577	0.867752	0.000150953	1.82482	2.30841
WBGene00018370	F42H10.6	Putative esterase F42H10.6(F42H10.6)	271.939	343.072	374.586	486.67	675.615	774.509	593.966	582.128	0.00140846	0.85332	2.86779e-05	1.80665	2.85126
WBGene00003402	mpk-2	Mitogen-activated protein kinase(mpk-2)	198.002	200.087	145.544	148.256	304.289	357.626	220.452	338.67	0.00301346	0.845415	7.69339e-05	1.79678	2.52094
WBGene00016728	C46H11.2	Flavin-containing monooxygenase(C46H11.2)	214.291	206.356	241.169	286.501	425.615	376.088	371.602	487.342	0.000135776	0.833261	1.62443e-06	1.78171	3.86718
WBGene00002056	ifc-2	Intermediate Filament, C(ifc-2)	3399.61	5248.25	5097.42	4671.44	8202.05	8558.71	6188.14	9269.29	0.000499202	0.832447	7.64179e-06	1.7807	3.30172
WBGene00044396	ZK1290.14	hypothetical protein(ZK1290.14)	281.622	329.653	240.177	257.272	513.455	610.452	385.232	395.1	0.00163335	0.80416	3.50008e-05	1.74613	2.78692
WBGene00010334	del-5	DEgenerin Like(del-5)	160.465	191.754	165.465	161.452	294.865	347.959	231.505	269.531	0.000167912	0.776518	2.08377e-06	1.71299	3.77492
WBGene00018350	ifo-1	Intermediate Filament Organize(ifo-1)	1622.86	1957.75	1664.33	1775.66	3041.82	2729.63	2438.51	3571.31	1.46638e-05	0.774601	1.15506e-07	1.71072	4.83375
WBGene00019617	K10C2.1	Carboxypeptidase(K10C2.1)	2421.8	4129.03	3637.35	2959.49	5914.28	6536.22	4219.96	5369.18	0.00529747	0.769617	0.000169273	1.70482	2.27593
WBGene00019187	H11E01.2	hypothetical protein(H11E01.2)	169.165	159.709	138.958	144.549	270.78	261.308	252.751	201.378	0.000243905	0.712559	3.22621e-06	1.63871	3.61278
WBGene00001522	gbh-1	Probable gamma-butyrobetaine dioxygenase(gbh-1)	341.197	354.971	506.222	443.384	667.278	599.03	647.084	707.829	0.00167827	0.696035	3.65411e-05	1.62005	2.77514
WBGene00015887	C17C3.1	hypothetical protein(C17C3.1)	472.795	638.3	490.599	412.103	745.632	865.401	873.811	685.229	0.00157077	0.682371	3.29164e-05	1.60477	2.80389
WBGene00021564	Y45G12B.3	L-2-hydroxyglutarate dehydrogenase, mitochondrial(Y45G12B.3)	372.962	440.231	403.012	364.408	565.861	654.618	575.668	590.781	8.18514e-08	0.621307	3.04122e-10	1.53827	7.08697
WBGene00008132	gale-1	UDP-GALactose 4-Epimerase(gale-1)	1062.39	945.812	942.368	915.954	1448.71	1687.71	1252.67	1331.05	3.14153e-05	0.587685	2.8014e-07	1.50283	4.50286
WBGene00000929	dao-3	Dauer or Aging adult Overexpression(dao-3)	716.398	577.947	782.766	664.383	461.398	402.102	402.373	527.386	0.00693243	-0.587031	0.000242638	0.665712	2.15911
WBGene00015350	fbxl-1	Uncharacterized F-box/LRR-repeat protein C02F5.7(fbxl-1)	3335.46	3764.16	2827.48	2719.17	2205.18	2287.2	1798.65	1965.72	0.000930493	-0.589747	1.70851e-05	0.664459	3.03129
WBGene00000901	daf-5	hypothetical protein(daf-5)	1941.4	1800.98	1462.98	1245.84	1035.7	1083.67	962.361	1100.79	0.00523078	-0.599085	0.000166365	0.660172	2.28143
WBGene00016028	flp-24	VPSAGDMMVRF-amide(flp-24)	1139.47	1076.99	916.958	1087.25	650.762	885.257	655.86	526.31	0.0072665	-0.613231	0.000257846	0.653731	2.13867
WBGene00013899	ZC443.4	hypothetical protein(ZC443.4)	641.416	614.398	573.518	582.643	331.742	348.516	426.278	438.188	0.000393042	-0.614475	5.78303e-06	0.653167	3.40556
WBGene00015802	kynu-1	Kynureninase(kynu-1)	506.788	454.094	460.898	559.275	365.124	325.949	271.501	309.646	0.000542305	-0.6158	8.54341e-06	0.652568	3.26576
WBGene00017569	F18E9.3	hypothetical protein(F18E9.3)	757.733	735.762	747.667	733.932	468.739	457.808	515.018	464.033	1.7449e-11	-0.616165	3.37128e-14	0.652403	10.7582
WBGene00002179	jph-1	JunctoPHilin(jph-1)	802.034	760.458	570.601	617.358	420.628	398.887	424.365	513.954	0.00498478	-0.617341	0.000154466	0.651871	2.30235
WBGene00011361	lyst-1	LYSosomal Trafficking regulator protein(lyst-1)	438.533	527.036	360.548	356.118	276.248	300.182	233.996	264.579	0.00758577	-0.619777	0.000272833	0.650771	2.12
WBGene00002100	ins-17	INSulin related(ins-17)	434.751	381.293	341.665	320.428	250.086	235.934	224.892	231.975	0.0004433	-0.62296	6.62134e-06	0.649338	3.3533
WBGene00001502	ftt-2	14-3-3-like protein 2(ftt-2)	12358.9	13098.2	10143.1	9796.1	6432.38	6433.9	7452.53	8484.64	0.00161077	-0.627987	3.42028e-05	0.647079	2.79297
WBGene00018532	F47B7.1	UPF0057 membrane protein F47B7.1(F47B7.1)	2170.16	2210.14	1801.72	2066.28	1262.71	1103.06	1400.73	1446.98	9.44047e-05	-0.633173	1.01722e-06	0.644757	4.02501
WBGene00006603	tps-2	Alpha,alpha-trehalose-phosphate synthase [UDP-forming] 2(tps-2)	3161.44	3818.65	2748.01	2407.19	1940.55	2031.09	1621.11	2067.4	0.00403595	-0.63714	0.000113668	0.642986	2.39405
WBGene00003765	nlp-27	Neuropeptide-Like Protein(nlp-27)	1671.62	1232.34	1595.01	1791.09	1123.84	798.821	1008.27	1031.13	0.00668428	-0.640449	0.000231965	0.641513	2.17495
WBGene00010059	F54E4.3	hypothetical protein(F54E4.3)	181.751	191.227	221.594	216.274	132.931	129.821	117.825	131.3	0.000542502	-0.640763	8.58683e-06	0.641374	3.2656
WBGene00017904	lim-8	LIM domain family(lim-8)	778.884	815.265	759.012	738.612	445.749	500.65	493.011	505.283	1.28953e-12	-0.642137	1.72486e-15	0.640763	11.8896
WBGene00007480	glna-1	GLutamiNAse(glna-1)	319.618	323.396	272.736	254.515	186.657	168.603	175.896	203.77	0.000688703	-0.64315	1.14127e-05	0.640313	3.16197
WBGene00001403	fbl-1	FiBuLin(fbl-1)	831.792	761.943	770.369	765.877	379.889	461.04	482.011	644.409	0.0085528	-0.644443	0.000323251	0.63974	2.06789
WBGene00017772	clec-1	C-type LECtin(clec-1)	5395.94	5467.18	4419.12	4077.8	2966.75	3018.2	2961.66	3127.01	3.59302e-06	-0.654622	2.3496e-08	0.635242	5.44454
WBGene00008233	C50F4.8	hypothetical protein(C50F4.8)	1722.91	1320.81	1332.85	1613.04	1033.8	938.353	871.154	896.565	4.23333e-05	-0.654794	4.02665e-07	0.635166	4.37332
WBGene00010703	K09A9.6	hypothetical protein(K09A9.6)	351.096	299.328	299.126	265.001	183.169	188.783	169.958	214.752	0.000698806	-0.657131	1.16321e-05	0.634138	3.15564
WBGene00019324	K02F2.5	hypothetical protein(K02F2.5)	630.273	631.687	503.106	575.497	366.696	311.066	443.871	332.127	0.00163335	-0.658103	3.5194e-05	0.633711	2.78692
WBGene00007695	C23H4.7	Carboxylic ester hydrolase(C23H4.7)	124.061	136.444	137.309	157.121	94.2115	93.3506	67.4407	91.0325	0.00999085	-0.659338	0.000396515	0.633169	2.0004
WBGene00008582	F08G5.3	hypothetical protein(F08G5.3)	251.046	258.705	224.336	230.295	143.42	184.386	126.012	145.666	0.000868605	-0.66141	1.56203e-05	0.63226	3.06118
WBGene00003843	oct-2	Organic Cation Transporter(oct-2)	334.618	368.354	413.688	420.198	209.349	222.041	243.219	279.009	0.00097004	-0.661692	1.7949e-05	0.632136	3.01321
WBGene00006749	unc-9	Innexin unc-9(unc-9)	292.399	297.927	262.199	252.818	170.608	176.978	137.886	199.417	0.0011514	-0.664683	2.27003e-05	0.630828	2.93877
WBGene00020497	T14A8.2	hypothetical protein(T14A8.2)	234.726	234.869	184.55	202.1	119.375	129.842	131.582	148.582	0.0010994	-0.664794	2.13231e-05	0.630779	2.95884
WBGene00009340	best-14	Bestrophin homolog 14(best-14)	586.532	625.245	709.87	728.391	453.017	427.77	395.072	367.154	9.97841e-06	-0.666566	7.56334e-08	0.630004	5.00094
WBGene00020930	hlh-30	Helix Loop Helix(hlh-30)	7457.34	7200.02	6870.96	5774.69	3591.29	3410.55	4572.12	5266.47	0.00575327	-0.668623	0.000189823	0.629107	2.24009
WBGene00003736	nhx-9	Probable Na(+)/H(+) antiporter nhx-9(nhx-9)	377.082	313.555	251.7	310.189	185.265	195.211	195.635	197.459	0.00103387	-0.669126	1.95143e-05	0.628888	2.98553
WBGene00011531	rsbp-1	R-Seven Binding Protein (R7BP) homolog(rsbp-1)	674.122	725.794	560.245	536.536	328.61	376.356	400.606	429.545	0.000610142	-0.673301	9.92949e-06	0.62707	3.21457
WBGene00010848	M04B2.6	hypothetical protein(M04B2.6)	252.959	228.124	240.447	273.624	134.03	143.796	146.197	187.926	0.0018552	-0.675025	4.21856e-05	0.626321	2.73161
WBGene00015551	C06G3.5	hypothetical protein(C06G3.5)	2739.24	3703.7	3324.34	3908.92	2403.92	2410.45	1800.45	1747.04	0.00188942	-0.686115	4.33849e-05	0.621526	2.72367
WBGene00020436	T12A2.1	hypothetical protein(T12A2.1)	255.922	194.857	192.139	221.893	127.728	133.049	109.535	157.229	0.00596829	-0.688583	0.000200909	0.620463	2.22415
WBGene00008666	F10G8.8	hypothetical protein(F10G8.8)	788.548	723.786	746.757	621.103	408.092	336.798	473.824	532.177	0.00491577	-0.688934	0.000149916	0.620312	2.30841
WBGene00017659	F21C10.10	hypothetical protein(F21C10.10)	6171.74	6794.7	7506.9	7620.22	4513.86	4282.87	3433.7	4856	6.717e-05	-0.692053	6.88821e-07	0.618972	4.17282
WBGene00004024	php-3	Posterior Hox gene Paralog(php-3)	779.963	773.016	761.298	693.432	416.413	475.75	371.431	566.342	0.000477557	-0.6924	7.23947e-06	0.618823	3.32098
WBGene00019854	R03H10.1	hypothetical protein(R03H10.1)	319.297	273.436	341.771	345.967	158.11	186.663	191.039	238.747	0.00320319	-0.699652	8.33109e-05	0.615721	2.49442
WBGene00015753	C14B9.3	hypothetical protein(C14B9.3)	139.477	157.076	149.13	136.609	81.0645	101.313	82.8305	86.8116	0.000403108	-0.707052	5.96109e-06	0.61257	3.39458
WBGene00006741	unc-1	Protein unc-1(unc-1)	516.455	587.608	372.822	400.298	266.869	294.878	264.207	299.111	0.00272064	-0.710831	6.73235e-05	0.610968	2.56533
WBGene00011392	sbt-1	Seven B Two (mammalian 7BT prohormone convertase chaperone) homolog(sbt-1)	3321.16	3019.76	2025.93	2259.73	1727.14	1665.65	1596.48	1385.53	0.00337728	-0.711265	8.88429e-05	0.610785	2.47143
WBGene00019597	K09H9.5	hypothetical protein(K09H9.5)	123.163	113.888	117.44	122.289	80.608	71.9528	63.8286	69.9143	0.00108915	-0.713708	2.10393e-05	0.609751	2.96291
WBGene00011283	R90.1	hypothetical protein(R90.1)	955.876	924.484	703.101	749.858	456.219	495.323	436.188	603.133	0.00090764	-0.716234	1.64572e-05	0.608684	3.04209
WBGene00011003	R04B5.5	hypothetical protein(R04B5.5)	595.207	606.209	673.9	717.133	475.999	374.228	379.515	321.104	0.000248823	-0.717147	3.30974e-06	0.608299	3.60411
WBGene00020114	pde-4	Phosphodiesterase(pde-4)	2295.22	2512.81	1555.65	1523.98	1129.87	1165.17	1062.06	1347.25	0.00901594	-0.717546	0.00034705	0.608131	2.04499
WBGene00000437	ceh-13	Homeobox protein ceh-13(ceh-13)	231.85	201.852	172.229	236.062	145.461	133.033	124.248	100.551	0.00408849	-0.719227	0.000115755	0.607423	2.38844
WBGene00016266	idhg-2	Isocitrate dehydrogenase [NAD] subunit, mitochondrial(idhg-2)	563.447	670.233	676.729	734.051	402.838	391.364	344.689	434.329	5.25299e-06	-0.723823	3.66933e-08	0.605491	5.27959
WBGene00017028	dex-1	Dendrite extension defective protein 1(dex-1)	182.839	180.052	135.35	132.507	78.5948	105.136	88.5476	101.58	0.00838512	-0.727886	0.000310306	0.603788	2.07649
WBGene00012398	Y6E2A.4	hypothetical protein(Y6E2A.4)	127.049	112.611	107.961	105.316	64.9587	53.809	74.9124	73.7772	0.0070951	-0.729701	0.000249385	0.603029	2.14904
WBGene00004364	ric-4	Synaptosomal-associated protein(ric-4)	786.647	801.896	570.608	636.179	463.482	458.833	398.718	334.523	0.00084672	-0.730821	1.49121e-05	0.602561	3.07226
WBGene00017795	F25F8.1	hypothetical protein(F25F8.1)	167.371	204.907	162.845	156.042	101.571	106.245	98.6194	99.6347	0.00016437	-0.738916	2.01539e-06	0.599189	3.78418
WBGene00013906	ugt-5	UDP-GlucuronosylTransferase(ugt-5)	293.293	369.111	310.47	342.188	180.05	185.6	194.702	209.934	2.4256e-06	-0.742541	1.40593e-08	0.597686	5.61518
WBGene00004739	scd-1	Suppressor of Constitutive Dauer formation(scd-1)	3422.93	3813.12	3864.74	3288.62	1756.51	1713.99	2246.16	2677.33	0.00120193	-0.749314	2.39368e-05	0.594887	2.92012
WBGene00011755	T13H5.1	Protein-tyrosine-phosphatase(T13H5.1)	457.169	519.913	387.082	431.8	284.655	272.05	218.536	269.235	1.67012e-05	-0.756685	1.34036e-07	0.591855	4.77725
WBGene00007142	ttr-18	TransThyretin-Related family domain(ttr-18)	2664.38	2315.09	2536.14	2579.33	1533.63	1414.91	1493.99	1423.91	1.96638e-18	-0.758119	1.06115e-21	0.591267	17.7063
WBGene00001476	fmo-1	Dimethylaniline monooxygenase [N-oxide-forming](fmo-1)	1753.89	1905.26	1356.99	1264.68	900.782	1047.21	748.164	951.174	0.000829109	-0.758306	1.45404e-05	0.59119	3.08139
WBGene00004182	prk-1	Pim (mammalian oncogene) Related Kinase(prk-1)	1001.89	1145.94	1358.16	1134.22	582.812	510.438	703.449	890.84	0.00861427	-0.759069	0.000327615	0.590878	2.06478
WBGene00008571	prmn-1	PRoMiNin (5-transmembrane domain glycoprotein) homolog(prmn-1)	325.936	437.042	443.036	453.105	255.335	238.11	203.763	264.593	0.000281924	-0.761055	3.8967e-06	0.590065	3.54987
WBGene00000908	daf-12	Nuclear hormone receptor family member daf-12(daf-12)	1496.26	1606.6	907.422	1016.64	788.824	799.661	613.672	696.074	0.00979455	-0.767593	0.000387939	0.587397	2.00902
WBGene00001669	gpa-7	Guanine nucleotide-binding protein alpha-7 subunit(gpa-7)	158.702	206.033	179.003	140.016	82.7839	101.967	98.6286	110.213	0.00293929	-0.768023	7.3772e-05	0.587222	2.53176
WBGene00006745	unc-5	Netrin receptor unc-5(unc-5)	317.409	318.13	279.234	292.339	141.379	152.414	180.988	220.526	0.00111223	-0.768189	2.17371e-05	0.587154	2.95381
WBGene00012364	zmp-4	Zinc MetalloProtease(zmp-4)	1201.93	1067.74	1278.58	1373.93	837.961	622.924	747.371	627.011	3.35547e-05	-0.770394	3.01711e-07	0.586258	4.47425
WBGene00016269	C30G4.4	hypothetical protein(C30G4.4)	1329.8	1572.48	1271.87	1368.18	857.869	830.771	685.962	813.08	1.04363e-09	-0.772711	2.63681e-12	0.585316	8.98145
WBGene00019184	H10E21.4	hypothetical protein(H10E21.4)	257.755	261.229	264.135	285.838	132.996	140.608	132.406	207.123	0.00293929	-0.774413	7.4263e-05	0.584627	2.53176
WBGene00017957	F31F4.1	hypothetical protein(F31F4.1)	230.736	307.546	369.321	320.586	156.006	160.975	169.968	216.68	0.00596286	-0.776692	0.00019919	0.583704	2.22455
WBGene00011417	T04A11.2	hypothetical protein(T04A11.2)	194.361	160.302	164.741	181.511	93.2246	107.315	105.053	95.7889	2.59533e-05	-0.780833	2.23719e-07	0.58203	4.58581
WBGene00013650	Y105C5B.9	Phytanoyl-CoA dioxygenase domain-containing protein 1 homolog(Y105C5B.9)	365.481	403.499	338.878	295.067	215.582	180.274	218.525	184.956	3.7986e-05	-0.781786	3.52846e-07	0.581646	4.42038
WBGene00001452	flp-9	KPSFVRF-amide 2(flp-9)	1096.31	777.552	773.153	900.294	428.002	482.494	623.028	490.863	0.000881163	-0.783247	1.59116e-05	0.581058	3.05494
WBGene00011235	suro-1	Putative carboxypeptidase suro-1(suro-1)	293.571	284.864	258.043	290.237	146.477	131.738	145.06	219.356	0.00446409	-0.7845	0.000129375	0.580553	2.35027
WBGene00019304	K02D10.4	hypothetical protein(K02D10.4)	238.561	253.796	194.019	232.238	125.649	110.625	139.828	145.688	0.00018633	-0.785145	2.36608e-06	0.580294	3.72972
WBGene00008270	C53A5.13	hypothetical protein(C53A5.13)	288.567	240.046	279.299	285.821	149.711	161.995	175.539	137	4.62513e-06	-0.785744	3.16201e-08	0.580053	5.33488
WBGene00018195	btb-16	BTB (Broad/complex/Tramtrack/Bric a brac) domain protein(btb-16)	178.095	155.772	181.859	187.185	122.196	93.8094	77.0097	109.554	0.00259985	-0.787269	6.35618e-05	0.57944	2.58505
WBGene00010593	gsnl-1	Gelsolin-like protein 1(gsnl-1)	697.182	767.439	613.251	663.483	376.711	415.995	309.867	456.394	2.0225e-05	-0.788277	1.69831e-07	0.579035	4.69411
WBGene00010902	M79.2	hypothetical protein(M79.2)	1032.75	1209.58	889.558	867.294	615.182	709.57	459.015	491.795	0.000787531	-0.790112	1.36356e-05	0.578299	3.10373
WBGene00011095	gana-1	GAlactosidase/N-Acetylgalactosaminidase(gana-1)	305.825	305.279	326.612	347.867	193.62	165.268	158.02	212.825	1.61183e-05	-0.791229	1.28161e-07	0.577852	4.79268
WBGene00019328	clec-149	C-type LECtin(clec-149)	223.181	213.605	189.315	227.582	97.4429	99.9136	127.927	156.282	0.00469524	-0.795939	0.000139024	0.575968	2.32834
WBGene00008610	F09C3.2	hypothetical protein(F09C3.2)	275.187	236.09	189.285	201.145	129.819	134.123	138.921	107.266	0.000867743	-0.796228	1.55403e-05	0.575853	3.06161
WBGene00018356	islo-1	Interactor with SLO-1(islo-1)	315.497	375.851	237.523	254.681	152.862	179.132	155.306	181.159	0.00143294	-0.796298	2.94958e-05	0.575825	2.84377
WBGene00001163	efn-2	Eph(F)riN(efn-2)	325.165	336.748	217.641	228.346	146.579	185.512	124.135	168.692	0.0089024	-0.800983	0.000340695	0.573958	2.05049
WBGene00010681	mak-1	MAP kinase Activated protein Kinase(mak-1)	9520.59	11867.3	10401.5	9633.64	5481.52	4954.94	5755.13	7089.38	5.93445e-06	-0.802713	4.27763e-08	0.57327	5.22662
WBGene00003728	nhr-138	Nuclear Hormone Receptor family(nhr-138)	699.165	680.671	582.058	518.688	330.691	362.422	316.325	379.656	1.21399e-06	-0.810281	6.3149e-09	0.570271	5.91578
WBGene00006321	sup-12	SUPpressor(sup-12)	560.772	504.621	383.282	352.342	218.782	239.208	243.155	303.931	0.00346041	-0.813379	9.20582e-05	0.569047	2.46087
WBGene00004234	ptr-20	PaTched Related family(ptr-20)	287.687	218.526	224.37	216.197	150.71	134.143	120.529	123.587	0.000108948	-0.816853	1.2225e-06	0.567679	3.96278
WBGene00015371	C03A7.13	hypothetical protein(C03A7.13)	143.366	134.032	147.179	133.538	90.03	72.0038	62.8551	86.605	0.000602937	-0.818243	9.64096e-06	0.567132	3.21973
WBGene00019931	R07C12.1	hypothetical protein(R07C12.1)	189.58	205.694	171.805	147.793	111.149	84.8977	111.657	89.0611	0.00108915	-0.818303	2.10432e-05	0.567109	2.96291
WBGene00016201	tdo-2	Tryptophan 2,3-dioxygenase(tdo-2)	2862.57	2852.86	1700.42	1618.85	1169.64	1245.57	1396.12	1212.94	0.00788688	-0.819216	0.000286496	0.56675	2.10309
WBGene00008031	C39E9.7	hypothetical protein(C39E9.7)	177.122	123.513	135.421	129.752	80.6494	80.5426	81.2516	72.7672	0.00110183	-0.820712	2.1452e-05	0.566162	2.95788
WBGene00010868	somi-1	Suppressor of Overexpressed MIcro-RNA(somi-1)	1412.59	1392.9	1097.74	1043.92	617.33	627.205	704.337	795.849	2.3587e-05	-0.82157	2.01568e-07	0.565826	4.62733
WBGene00016133	C26B9.3	hypothetical protein(C26B9.3)	210.642	196.007	224.416	252.075	138.162	100.991	125.156	124.564	0.000125353	-0.827121	1.46593e-06	0.563653	3.90187
WBGene00001464	flp-21	FMRF-Like Peptide(flp-21)	283.797	241.043	222.435	267.045	124.626	107.446	171.923	152.389	0.00176325	-0.836401	3.95308e-05	0.560039	2.75369
WBGene00003497	mup-4	Transmembrane matrix receptor MUP-4(mup-4)	2230.83	2361.74	1618.17	1343.55	992.854	1140.49	850.63	1165.99	0.00320319	-0.837909	8.32575e-05	0.559454	2.49442
WBGene00013327	Y57G11C.38	hypothetical protein(Y57G11C.38)	104.92	95.9588	95.6829	96.9096	41.9927	47.3603	72.2471	53.6076	0.00942479	-0.840199	0.000369092	0.558567	2.02573
WBGene00012717	Y39E4B.6	hypothetical protein(Y39E4B.6)	1452.08	1307.25	1005	859.691	655.999	641.099	580.753	650.054	0.000350798	-0.844499	4.979e-06	0.556904	3.45494
WBGene00001631	gly-6	GLYcosylation related(gly-6)	1276.05	1198.06	1063.71	1031.76	559.8	617.531	636.619	679.797	5.80983e-11	-0.846492	1.25203e-13	0.556135	10.2358
WBGene00021403	Y38C1AB.1	hypothetical protein(Y38C1AB.1)	72.2527	58.0261	62.5681	56.4463	32.53	38.6865	32.7546	32.5131	0.00889315	-0.846991	0.00033968	0.555943	2.05094
WBGene00004036	plc-1	Phosphoinositide phospholipase C(plc-1)	917.439	927.816	715.46	627.649	421.699	446.035	361.112	509.127	0.000262142	-0.848593	3.54536e-06	0.555326	3.58146
WBGene00002110	ins-27	INSulin related(ins-27)	288.604	328.268	183.532	236.875	136.117	164.099	142.527	122.609	0.00401788	-0.849661	0.000112562	0.554915	2.396
WBGene00011097	nhr-206	Nuclear Hormone Receptor family(nhr-206)	85.6064	88.9707	122.342	97.854	49.2879	56.9466	53.7932	55.5322	0.00325679	-0.849701	8.51892e-05	0.5549	2.48721
WBGene00009723	F45D3.3	hypothetical protein(F45D3.3)	2091.46	1769.31	1535.86	1584.65	906.625	885.752	983.935	1019.61	3.16398e-08	-0.852249	1.05803e-10	0.553921	7.49977
WBGene00017124	E04F6.4	hypothetical protein(E04F6.4)	180.321	149.036	206.683	255.759	120.537	102.159	118.109	90.2375	0.00601977	-0.853262	0.000204879	0.553532	2.22042
WBGene00015434	C04E12.4	hypothetical protein(C04E12.4)	442.427	417.635	260.974	316.504	210.122	246.043	167.048	155.964	0.00797024	-0.862512	0.000290807	0.549994	2.09853
WBGene00008987	F20G2.3	hypothetical protein(F20G2.3)	220.245	187.431	139.834	164.996	119.786	110.5	79.3163	75.8474	0.00849392	-0.866038	0.000318751	0.548652	2.07089
WBGene00013996	ZK550.2	hypothetical protein(ZK550.2)	1078.82	1237.42	1523.82	1116.32	613.146	680.755	659.473	712.392	2.71639e-07	-0.869873	1.21114e-09	0.547195	6.56601
WBGene00020560	T19C3.2	hypothetical protein(T19C3.2)	153.901	149.598	185.685	179.678	70.2515	76.3297	94.9741	115.996	0.00370216	-0.875201	0.000102616	0.545178	2.43155
WBGene00016505	ttr-33	TransThyretin-Related family domain(ttr-33)	977.128	674.021	694.657	695.402	289.961	363.569	556.28	417.029	0.00816964	-0.875632	0.000299297	0.545015	2.0878
WBGene00010449	K01A11.1	hypothetical protein(K01A11.1)	138.618	147.702	99.3875	97.7413	60.7957	71.9401	61.0792	64.1493	0.00350201	-0.879311	9.44472e-05	0.543627	2.45568
WBGene00003554	nas-38	Zinc metalloproteinase nas-38(nas-38)	129.883	133.927	145.919	128.85	60.819	64.5181	74.8408	86.2475	0.000232026	-0.881805	3.01735e-06	0.542688	3.63446
WBGene00001461	flp-18	SVPGVLRF-amide 3(flp-18)	372.374	228.24	237.565	276.403	174.771	151.304	160.853	107.233	0.0072148	-0.884149	0.000255202	0.541807	2.14178
WBGene00007999	tag-297	hypothetical protein(tag-297)	766.5	679.596	589.61	595.801	297.251	320.69	307.144	472.73	0.000602937	-0.884666	9.69454e-06	0.541613	3.21973
WBGene00020049	ttr-8	TransThyretin-Related family domain(ttr-8)	351.065	290	338.915	381.744	168.56	217.68	187.361	151.364	5.84282e-06	-0.888795	4.16817e-08	0.540065	5.23338
WBGene00015440	arrd-20	pseudo	104.55	85.3509	88.6692	88.9646	39.4266	46.1686	54.7617	54.9269	0.00207914	-0.890958	4.88229e-05	0.539256	2.68212
WBGene00011026	R05D7.1	hypothetical protein(R05D7.1)	200.191	202.357	140.093	122.123	77.5538	91.2697	85.7834	96.7701	0.00505449	-0.891936	0.000158129	0.538891	2.29632
WBGene00008392	D1086.5	hypothetical protein(D1086.5)	692.308	757.113	823.434	938.971	329.698	382.86	457.298	523.521	0.000188461	-0.896144	2.40881e-06	0.537321	3.72478
WBGene00014052	ZK669.2	hypothetical protein(ZK669.2)	173.065	221.907	239.602	265.274	119.373	128.77	107.704	119.76	9.39569e-05	-0.896553	1.00541e-06	0.537169	4.02707
WBGene00018407	F44B9.2	hypothetical protein(F44B9.2)	277.962	270.754	306.794	294.285	107.936	144.9	127.8	222.477	0.00818818	-0.903844	0.000300584	0.534461	2.08681
WBGene00001448	flp-5	GAKFIRF-amide(flp-5)	635.792	578.215	380.39	421.926	229.252	263.856	308.199	255.913	0.00103387	-0.90389	1.95052e-05	0.534444	2.98553
WBGene00008567	acox-1.4	Acyl-coenzyme A oxidase(F08A8.4)	299.467	361.62	372.922	282.813	191.533	151.558	155.404	191.582	1.68877e-05	-0.904018	1.36788e-07	0.534396	4.77243
WBGene00011732	arrd-17	Arrestin domain-containing protein 17(arrd-17)	599.222	681.099	351.97	368.294	266.873	282.044	225.702	272.231	0.00914458	-0.907142	0.000352682	0.53324	2.03884
WBGene00020156	T02B11.4	hypothetical protein(T02B11.4)	389.679	319.771	406.288	428.722	176.226	151.412	249.675	228.143	0.00114144	-0.911026	2.23928e-05	0.531807	2.94255
WBGene00001591	glc-1	Glutamate-gated chloride channel alpha(glc-1)	1126.04	781.389	983.285	1343.08	681.059	626.057	535.013	369.959	0.00568293	-0.914913	0.00018708	0.530376	2.24543
WBGene00007877	nfki-1	Nuclear Factor of Kappa light polypeptide gene enhancer in b(B)-cells n(nfki-1)	1862.69	1697	1126.09	883.109	725.058	734.354	658.509	762.248	0.00543776	-0.924267	0.000176063	0.526948	2.26458
WBGene00013633	Y105C5A.8	hypothetical protein(Y105C5A.8)	635.622	535.098	704.218	839.44	388.197	304.639	328.208	378.679	4.48557e-05	-0.930023	4.33324e-07	0.52485	4.34818
WBGene00021157	Y4C6B.3	hypothetical protein(Y4C6B.3)	312.677	330.683	230.003	204.828	163.27	168.383	121.405	103.399	0.00528621	-0.931082	0.000168521	0.524465	2.27686
WBGene00006831	unc-104	Kinesin-like protein unc-104(unc-104)	1154.06	1161.63	629.23	610.671	458.313	473.912	394.967	501.426	0.00956333	-0.931775	0.000375938	0.524213	2.01939
WBGene00015369	ugt-51	UDP-GlucuronosylTransferase(ugt-51)	416.372	575.276	518.083	402.792	242.081	237.81	230.006	274.753	2.3975e-06	-0.931989	1.37183e-08	0.524135	5.62024
WBGene00022245	acp-6	ACid Phosphatase family(acp-6)	5060.35	5306.74	5463	5016.59	1961.58	2090.21	2833.53	3818.47	0.0018121	-0.93249	4.08015e-05	0.523953	2.74182
WBGene00044500	T19E7.6	hypothetical protein(T19E7.6)	485.532	647.587	722.243	779.261	370.419	330.321	349.297	305.759	1.89681e-05	-0.933447	1.57868e-07	0.523606	4.72198
WBGene00015043	cyp-34A8	CYtochrome P450 family(cyp-34A8)	330.926	258.998	283.067	308.402	123.609	124.591	185.614	170.604	0.000254467	-0.938188	3.40373e-06	0.521888	3.59437
WBGene00016006	fln-2	FiLamiN (actin binding protein) homolog(fln-2)	5974	5052.99	3360.2	2745.36	2584.92	2276.59	1804.04	2101.86	0.00848434	-0.940319	0.000317761	0.521118	2.07138
WBGene00003959	pcp-4	Prolyl Carboxy Peptidase like(pcp-4)	644.242	984.392	689	654.044	363.133	454.555	273.211	430.473	0.000914257	-0.940618	1.66451e-05	0.521009	3.03893
WBGene00019521	dmd-7	DM (Doublesex/MAB-3) Domain family(dmd-7)	6167.14	6292.02	4214.7	3956.58	2438.54	2978.55	2453.74	2675.31	3.4009e-05	-0.94241	3.08322e-07	0.520363	4.46841
WBGene00019525	K08D9.4	hypothetical protein(K08D9.4)	256.767	257.808	221.276	190.958	82.9736	123.693	119.039	145.101	0.000821843	-0.949328	1.43519e-05	0.517874	3.08521
WBGene00001459	flp-16	GQTFVRF-amide(flp-16)	1717.5	1641	902.689	983.736	698.898	731.112	609.094	623.17	0.00301346	-0.95204	7.66657e-05	0.516901	2.52094
WBGene00015783	C15B12.1	Putative sarcosine oxidase(C15B12.1)	230.775	236.52	354.239	327.275	123.602	121.374	166.355	168.692	0.00215289	-0.958994	5.08746e-05	0.514415	2.66698
WBGene00019932	R07C12.2	pseudo	1051.48	1331.75	1115.91	1099.32	584.556	566.872	549.878	614.167	6.80331e-17	-0.962975	5.56115e-20	0.512998	16.1673
WBGene00008803	lips-10	LIPaSe related(lips-10)	680.966	661.326	430.559	469.855	270.034	323.826	243.075	293.321	0.000119112	-0.963188	1.36311e-06	0.512922	3.92404
WBGene00007296	arrd-25	ARRestin Domain protein(arrd-25)	1375.91	1505.14	1960.05	1731.9	759.606	737.627	824.154	987.626	1.56032e-06	-0.963777	8.46426e-09	0.512713	5.80679
WBGene00014091	ZK822.4	hypothetical protein(ZK822.4)	1560.66	1084.55	1331.53	1710.42	720.879	489.054	930.449	718.119	0.00263238	-0.964122	6.47482e-05	0.51259	2.57965
WBGene00001389	far-5	Fatty Acid/Retinol binding protein(far-5)	225.107	175.947	202.602	286.046	122.498	149.05	99.4492	78.4601	0.00598672	-0.966222	0.000202864	0.511845	2.22281
WBGene00001059	dpf-6	Dipeptidyl peptidase family member 6(dpf-6)	1006.94	1002.36	588.57	559.955	345.373	429.958	450.905	360.416	0.00349026	-0.966392	9.3371e-05	0.511784	2.45714
WBGene00003566	ncx-1	Na/Ca eXchangers(ncx-1)	1124.4	1076.08	1182.73	921.723	410.423	494.994	565.242	690.255	3.57068e-05	-0.9674	3.26368e-07	0.511427	4.44725
WBGene00013702	Y106G6D.6	hypothetical protein(Y106G6D.6)	282.927	246.174	393.974	410.045	155.202	143.551	196.328	175.86	0.00173222	-0.96789	3.82306e-05	0.511253	2.7614
WBGene00009059	chw-1	CHp/Wrch Rho-like protein homolog(chw-1)	99.1722	88.7723	77.6485	98.8752	53.4272	38.8051	40.9289	48.818	0.000736784	-0.975709	1.23473e-05	0.50849	3.13266
WBGene00017536	F17A9.4	hypothetical protein(F17A9.4)	489.461	577.221	526.27	600.673	332.733	298.13	205.513	256.858	2.94722e-06	-0.981327	1.75208e-08	0.506514	5.53059
WBGene00011072	tag-209	Putative protein tag-209(tag-209)	346.223	300.74	418.523	408.063	130.959	149.254	257.977	192.636	0.00502225	-0.984187	0.000156374	0.505511	2.2991
WBGene00021893	ndnf-1	NDNF (Neuron Derived Neurotrophic Factor) homolog(ndnf-1)	489.556	411.122	443.007	480.369	179.064	202.817	221.165	300.1	4.27743e-05	-0.986509	4.10038e-07	0.504698	4.36882
WBGene00010740	K10D3.6	hypothetical protein(K10D3.6)	607.715	653.606	715.58	800.86	255.441	343.183	403.338	368.122	4.69364e-06	-0.993632	3.24373e-08	0.502212	5.32849
WBGene00012062	T26G10.5	hypothetical protein(T26G10.5)	74.16	78.9477	52.045	71.5837	37.7458	28.0816	31.8041	38.2828	0.0053691	-0.995841	0.000171961	0.501443	2.2701
WBGene00018656	txdc-12.2	hypothetical protein(F49H12.5)	520.301	491.799	466.631	543.343	315.984	253.148	211.04	215.607	1.77117e-07	-0.998557	7.37054e-10	0.5005	6.75174
WBGene00010456	K01C8.1	hypothetical protein(K01C8.1)	3809.45	3763.01	3717.03	3800.76	1594.33	1720.3	1961.49	2137.31	4.09732e-15	-0.99874	3.95818e-18	0.500437	14.3875
WBGene00003690	nhr-100	Nuclear hormone receptor family member nhr-100(nhr-100)	653.035	669.715	540.442	478.301	310.804	299.226	237.564	299.071	1.57169e-07	-1.00423	6.19004e-10	0.498537	6.80363
WBGene00000220	atf-2	ATF (cAMP-dependent transcription factor) family(atf-2)	115.58	95.8192	77.6315	91.2785	52.3952	48.4005	51.0608	34.3743	0.00175954	-1.00561	3.92258e-05	0.498061	2.7546
WBGene00000741	col-168	COLlagen(col-168)	982.085	854.798	700.006	683.125	346.832	346.254	359.375	518.326	9.35522e-05	-1.00772	9.87174e-07	0.497333	4.02895
WBGene00017201	grsp-4	Glycine Rich Secreted Protein(grsp-4)	450.981	365.252	614.425	698.586	238.665	233.902	288.013	277.02	0.00131762	-1.01216	2.67304e-05	0.495805	2.88021
WBGene00013882	msa-1	Microfilaria Surface-Associated protein(msa-1)	1868.49	1726.56	907.407	994.998	679.04	765.402	593.515	638.511	0.00408849	-1.01339	0.000115502	0.49538	2.38844
WBGene00001633	gly-8	Probable N-acetylgalactosaminyltransferase 8(gly-8)	236.589	213.954	310.668	307.564	100.608	96.7566	178.345	141.82	0.00596286	-1.01777	0.000200283	0.493879	2.22455
WBGene00021095	mlt-8	hypothetical protein(mlt-8)	545.408	535.193	353.935	352.376	222.948	242.394	180.839	219.473	0.000114415	-1.02014	1.29235e-06	0.493067	3.94152
WBGene00010001	F53F8.4	hypothetical protein(F53F8.4)	1053.09	1062.98	670.938	585.319	356.884	396.787	417.898	456.351	0.000770331	-1.02249	1.32806e-05	0.492265	3.11332
WBGene00000477	cft-1	Cystic Fibrosis Transmembrane conductance regulator homolog(cft-1)	67.4285	76.4316	51.1321	56.8686	28.3622	31.3939	28.2045	33.484	0.00350756	-1.02366	9.53717e-05	0.491868	2.45499
WBGene00010472	cdr-7	CaDmium Responsive(cdr-7)	193.337	199.346	233.977	217.26	93.2534	81.7289	102.233	129.394	2.93692e-05	-1.0245	2.56105e-07	0.491582	4.53211
WBGene00020989	W03D8.8	hypothetical protein(W03D8.8)	107.711	119.803	147.85	158.172	54.5529	61.3041	67.4954	73.7534	0.000307272	-1.02672	4.33839e-06	0.490823	3.51248
WBGene00010110	F55D12.1	hypothetical protein(F55D12.1)	216.568	201.257	143.878	142.864	96.3404	87.0108	72.9019	83.3064	0.000267353	-1.02735	3.65557e-06	0.490611	3.57291
WBGene00010221	F57G12.1	hypothetical protein(F57G12.1)	3261.64	3018.15	1973.94	1788	1143.51	1262.74	1114.16	1296.37	0.000163244	-1.03315	1.97732e-06	0.488644	3.78716
WBGene00017991	clec-180	C-type lectin domain-containing protein 180(clec-180)	184.804	159.966	142.987	146.706	83.7945	85.9021	62.828	71.7932	3.59302e-06	-1.03835	2.30522e-08	0.486884	5.44454
WBGene00005655	srr-4	Serpentine Receptor, class R(srr-4)	464.52	490.398	440.153	482.238	226.094	215.663	205.573	248.259	1.96638e-18	-1.04087	1.28512e-21	0.486033	17.7063
WBGene00003549	nas-31	Zinc metalloproteinase nas-31(nas-31)	149.336	104.164	80.4422	89.3278	50.3349	59.0855	46.4093	45.9039	0.00483916	-1.04603	0.000144952	0.484299	2.31523
WBGene00010321	F59B10.5	hypothetical protein(F59B10.5)	228.096	231.96	150.488	150.369	100.533	101.985	75.6332	83.2923	0.000594964	-1.04925	9.46141e-06	0.483219	3.22551
WBGene00001373	exp-1	Gamma-aminobutyric acid receptor exp-1(exp-1)	66.427	59.2658	84.4903	65.9007	28.3785	33.3946	32.7329	36.3577	0.00143294	-1.05259	2.94912e-05	0.4821	2.84377
WBGene00009049	F22B8.7	hypothetical protein(F22B8.7)	681.707	761.486	431.025	397.146	328.853	311.491	232.06	204.813	0.00494121	-1.05292	0.000152382	0.481991	2.30617
WBGene00008607	F09B12.3	Putative phospholipase B-like 2(F09B12.3)	978.99	899.48	866.97	731.076	350.616	425.707	424.299	443.872	5.55923e-12	-1.05386	9.08844e-15	0.481677	11.255
WBGene00008215	C49F8.3	hypothetical protein(C49F8.3)	190.436	215.864	216.869	247.421	66.1101	89.2157	107.735	147.646	0.0041794	-1.05455	0.000119891	0.481446	2.37889
WBGene00008820	nlp-55	hypothetical protein(F14F11.2)	950.297	830.025	424.791	540.298	323.384	365.652	303.479	296.161	0.002952	-1.06547	7.48037e-05	0.477815	2.52988
WBGene00009653	F43D9.1	hypothetical protein(F43D9.1)	149.233	157.051	108.895	92.0709	57.669	61.2829	60.1564	58.3769	0.000736784	-1.0671	1.23737e-05	0.477279	3.13266
WBGene00016976	C56E10.3	hypothetical protein(C56E10.3)	48.1188	65.8037	59.7903	48.9385	27.2959	32.2558	20.7907	23.8669	0.00457087	-1.07371	0.000133149	0.475097	2.34
WBGene00003749	nlp-11	Neuropeptide-like peptide 11(nlp-11)	470.473	366.755	277.284	312.051	138.263	143.889	191.031	188.809	0.00024019	-1.07858	3.14138e-06	0.473494	3.61944
WBGene00003604	nhr-5	Nuclear Hormone Receptor family(nhr-5)	530.935	458.483	497.963	418.228	231.32	195.333	211.987	245.378	2.15173e-11	-1.08216	4.47711e-14	0.472321	10.6672
WBGene00011692	T10G3.1	hypothetical protein(T10G3.1)	528.051	573.168	388.027	409.761	157.119	161.084	231.242	325.054	0.00543776	-1.08696	0.000176989	0.470751	2.26458
WBGene00019105	asp-8	ASpartyl Protease(asp-8)	175.059	159.216	247.338	209.778	69.2281	68.8861	89.4037	136.146	0.00832015	-1.09295	0.000306665	0.468802	2.07987
WBGene00014210	ZK1067.4	Transmembrane protein 151 homolog(ZK1067.4)	61.6994	55.3447	44.5308	48.021	25.2042	23.7477	27.2943	20.0206	0.0033945	-1.09517	8.95479e-05	0.46808	2.46922
WBGene00008914	F17C11.2	hypothetical protein(F17C11.2)	1387.83	1154.59	569.563	660.501	409.179	513.54	361.073	435.221	0.00788688	-1.10868	0.000287179	0.463717	2.10309
WBGene00003550	nas-32	Zinc metalloproteinase nas-32(nas-32)	123.377	78.168	73.8773	71.4674	32.581	36.652	38.1917	49.7995	0.00669781	-1.1138	0.000232933	0.462076	2.17407
WBGene00000118	alh-12	ALdehyde deHydrogenase(alh-12)	1106.66	1583.18	1574.83	1773.38	600.628	711.875	587.08	840.896	1.93125e-06	-1.11433	1.09069e-08	0.461905	5.71416
WBGene00018060	arrd-18	ARRestin Domain protein(arrd-18)	303.217	263.153	184.398	146.298	104.745	114.578	100.59	87.1087	0.00202026	-1.11607	4.69975e-05	0.461349	2.69459
WBGene00022816	fbn-1	FiBrilliN homolog(fbn-1)	464.728	419.734	240.33	250.868	146.612	195.204	145.181	136.971	0.00212274	-1.12015	5.00043e-05	0.460047	2.6731
WBGene00018262	cyp-33C3	CYtochrome P450 family(cyp-33C3)	207.614	192.416	238.481	187.935	99.6386	120.159	65.109	90.0955	3.08239e-05	-1.12387	2.72575e-07	0.458862	4.51111
WBGene00019318	K02E10.4	hypothetical protein(K02E10.4)	137.755	114.609	83.305	88.3919	47.205	46.2974	56.5572	40.1344	0.000999469	-1.12912	1.85678e-05	0.457196	3.00023
WBGene00000512	ckb-2	Choline kinase B2(ckb-2)	850.343	657.83	407.812	452.907	325.431	323.835	186.26	229.98	0.00543776	-1.12923	0.000176586	0.457158	2.26458
WBGene00018418	F44E2.4	hypothetical protein(F44E2.4)	354.103	289.443	251.823	230.267	120.457	143.802	105.804	135.091	1.85178e-06	-1.1321	1.03206e-08	0.456251	5.73241
WBGene00012085	T27D12.1	hypothetical protein(T27D12.1)	3761.68	2667.88	2535.2	1852.82	815.114	926.322	1482.11	1612.86	0.0056669	-1.13214	0.000186131	0.456237	2.24665
WBGene00015370	C03A7.12	hypothetical protein(C03A7.12)	96.1672	136.346	150.185	114.176	63.6146	53.0816	53.1054	52.6125	5.33459e-05	-1.13985	5.31199e-07	0.453805	4.2729
WBGene00021389	Y38A10A.2	hypothetical protein(Y38A10A.2)	55.8917	48.4301	52.1829	52.7795	24.1626	24.8051	22.6662	20.9866	0.000528641	-1.15374	8.24958e-06	0.449459	3.27684
WBGene00009500	F36H2.3	hypothetical protein(F36H2.3)	343.554	325.746	201.582	183.197	121.485	122.399	95.7329	125.502	0.000930493	-1.15679	1.71481e-05	0.448509	3.03129
WBGene00002827	let-653	hypothetical protein(let-653)	475.379	358.179	257.434	202.877	128.84	131.02	138.787	169.633	0.00366785	-1.15795	0.000101393	0.448149	2.43559
WBGene00012728	Y39G8B.9	hypothetical protein(Y39G8B.9)	131.027	92.3674	104.284	74.2367	33.6449	36.6895	59.3558	45.9184	0.00491577	-1.16494	0.000149737	0.445981	2.30841
WBGene00005016	sqt-1	Cuticle collagen sqt-1(sqt-1)	871.487	699.369	468.426	435.011	288.86	274.615	192.664	325.938	0.00175954	-1.16578	3.91628e-05	0.445724	2.7546
WBGene00012778	Y42A5A.3	hypothetical protein(Y42A5A.3)	152.888	149.826	274.875	234.3	80.7131	82.7774	93.0753	97.6981	0.000858944	-1.17174	1.52551e-05	0.443886	3.06604
WBGene00004003	pgp-9	P-GlycoProtein related(pgp-9)	287.69	262.086	271.823	201.12	135.05	170.462	74.6374	67.8868	0.00923089	-1.17345	0.00035944	0.443361	2.03476
WBGene00012531	Y32F6B.1	Solute carrier organic anion transporter family member(Y32F6B.1)	1612.44	1652.72	2454.07	2280.74	803.56	747.315	923.873	981.831	2.59112e-07	-1.18465	1.13603e-09	0.439931	6.58651
WBGene00011099	nhr-208	Nuclear Hormone Receptor family(nhr-208)	69.3557	84.5432	53.986	58.3507	26.2849	37.6193	24.4405	26.7334	0.0016289	-1.18706	3.474e-05	0.439196	2.7881
WBGene00010225	ttr-31	TransThyretin-Related family domain(ttr-31)	415.474	353.012	480.983	514.335	155.015	150.36	225.787	227.164	1.74325e-05	-1.18975	1.42497e-07	0.43838	4.75864
WBGene00020612	arrd-22	ARRestin Domain protein(arrd-22)	90.9645	71.8493	77.405	57.9905	40.3014	32.729	23.2655	33.1188	0.00163335	-1.19459	3.54167e-05	0.436911	2.78692
WBGene00000111	alh-5	Aldehyde dehydrogenase(alh-5)	485.605	528.724	585.956	729.587	181.186	185.746	294.404	334.593	0.000539058	-1.19655	8.4522e-06	0.436318	3.26836
WBGene00019092	F59A7.5	hypothetical protein(F59A7.5)	364.673	258.888	276.462	286.774	75.5444	120.298	166.366	145.646	0.00073869	-1.19716	1.26802e-05	0.436134	3.13154
WBGene00016628	slc-36.5	SLC (SoLute Carrier) homolog(slc-36.5)	301.24	221.85	169.383	246.437	93.2674	108.463	101.285	99.5913	4.22665e-06	-1.2003	2.85818e-08	0.435186	5.374
WBGene00011718	T11G6.3	hypothetical protein(T11G6.3)	295.274	266.139	378.848	349.83	108.989	121.392	166.321	154.27	3.52468e-06	-1.20035	2.20014e-08	0.43517	5.45288
WBGene00008435	glna-2	GLutamiNAse(glna-2)	619.35	593.955	593.499	643.903	223.006	253.2	261.389	302.909	4.40993e-19	-1.20885	1.96623e-22	0.432612	18.3556
WBGene00019268	H41C03.1	hypothetical protein(H41C03.1)	438.686	391.581	355.974	299.8	174.831	171.703	136.907	146.562	7.69253e-10	-1.2145	1.71491e-12	0.430922	9.11393
WBGene00004145	pqn-62	Prion-like-(Q/N-rich)-domain-bearing protein(pqn-62)	988.768	869.198	539.39	516.766	272.167	318.559	253.999	381.557	0.000383545	-1.22204	5.61481e-06	0.428676	3.41618
WBGene00001699	grd-10	GRounDhog (hedgehog-like family)(grd-10)	404.921	456.842	411.834	387.291	129.923	154.622	192.806	217.581	5.71098e-08	-1.22719	1.99462e-10	0.42715	7.24329
WBGene00015660	catp-3	Cation transporting ATPase(catp-3)	11693.9	9584.67	5902.83	4350.13	2277.51	3070.85	3807.99	3930.57	0.00539237	-1.24016	0.000173107	0.423325	2.26822
WBGene00021008	W03F11.5	hypothetical protein(W03F11.5)	80.0024	71.853	67.3502	48.8682	23.1617	32.3085	29.0624	26.734	0.000657563	-1.24322	1.07501e-05	0.42243	3.18206
WBGene00007862	C32C4.1	hypothetical protein(C32C4.1)	70.4287	50.7181	50.5084	40.4298	17.9229	18.4334	26.3751	24.8458	0.00555924	-1.24345	0.000181769	0.42236	2.25498
WBGene00018789	F54C1.1	hypothetical protein(F54C1.1)	347.291	446.52	242.274	249.041	120.478	163.088	121.365	128.347	6.16772e-05	-1.24361	6.23326e-07	0.422315	4.20988
WBGene00001674	gpa-12	Guanine nucleotide-binding protein alpha-12 subunit(gpa-12)	264.564	227.945	282.26	267.099	61.9471	80.6998	143.489	143.761	0.00289974	-1.24718	7.21863e-05	0.421271	2.53764
WBGene00001796	gtl-2	Gon-Two Like (TRP subfamily)(gtl-2)	140.565	138.287	103.207	127.058	47.2349	59.1382	49.122	53.5746	9.27126e-08	-1.25842	3.51367e-10	0.418002	7.03286
WBGene00010516	K02E11.7	hypothetical protein(K02E11.7)	256.086	195.467	152.41	159.829	58.7768	80.6151	82.0817	89.0669	4.74883e-05	-1.2711	4.65814e-07	0.414344	4.32341
WBGene00021894	Y54G2A.32	hypothetical protein(Y54G2A.32)	318.496	245.7	227.194	299.114	91.202	80.708	161.566	107.251	0.000186025	-1.27894	2.3295e-06	0.412098	3.73043
WBGene00010514	K02E11.5	hypothetical protein(K02E11.5)	228.093	167.392	211.265	194.704	74.4433	76.3577	93.091	80.4087	1.03751e-09	-1.27931	2.39005e-12	0.411993	8.98401
WBGene00194692	T02C12.5	hypothetical protein(T02C12.5)	54.0514	44.6111	35.0718	33.8775	17.8842	18.3723	12.5541	19.0968	0.00598321	-1.27976	0.000202205	0.411863	2.22307
WBGene00011019	R05A10.2	hypothetical protein(R05A10.2)	256.019	225.073	184.639	179.573	97.4166	87.0551	93.0686	64.0694	4.71135e-07	-1.28202	2.19584e-09	0.411219	6.32685
WBGene00000233	avr-15	hypothetical protein(avr-15)	263.53	228.227	337.179	380.067	94.3672	109.606	159.939	122.598	5.5681e-05	-1.28689	5.5859e-07	0.409834	4.25429
WBGene00009968	fig-1	hypothetical protein(fig-1)	548.359	508.908	359.675	319.486	133.062	156.77	166.202	231.975	8.16512e-05	-1.30643	8.43392e-07	0.40432	4.08804
WBGene00016450	clec-5	C-type LECtin(clec-5)	206.556	426.288	574.814	583.946	212.377	155.479	152.404	191.643	0.00466524	-1.31051	0.000137284	0.403178	2.33113
WBGene00012545	Y37D8A.3	hypothetical protein(Y37D8A.3)	220.854	221.593	417.301	388.912	117.692	77.0792	147.475	152.089	0.00422223	-1.31159	0.000121738	0.402878	2.37446
WBGene00020672	T22B7.3	hypothetical protein(T22B7.3)	810.742	669.018	715.577	797.092	278.441	265.028	290.64	338.374	1.04248e-19	-1.32502	3.87337e-23	0.399144	18.9819
WBGene00000963	dhp-1	Dihydropyrimidinase 1(dhp-1)	3314.64	3111.49	1527.24	1432.79	846.463	958.413	934.804	911.786	0.000503662	-1.33461	7.7475e-06	0.3965	3.29786
WBGene00022415	Y102A11A.5	hypothetical protein(Y102A11A.5)	135.353	124.196	135.37	102.334	60.7791	49.5309	38.091	45.1346	9.03128e-07	-1.33542	4.63074e-09	0.396278	6.04425
WBGene00015366	C03A7.2	hypothetical protein(C03A7.2)	43.7195	74.9751	81.3827	57.4372	24.1924	24.8524	22.4275	27.7082	0.0011514	-1.35007	2.27593e-05	0.392273	2.93877
WBGene00009485	F36G9.3	hypothetical protein(F36G9.3)	241.549	187.507	225.46	214.462	112.031	91.3326	64.5914	66.949	5.10911e-07	-1.3557	2.4678e-09	0.390745	6.29165
WBGene00018692	F52E1.2	hypothetical protein(F52E1.2)	90.5881	59.3369	82.5507	76.3027	23.1792	23.8328	41.9581	28.6415	0.00073869	-1.36199	1.25721e-05	0.389046	3.13154
WBGene00016174	C27H5.4	hypothetical protein(C27H5.4)	303.66	384.225	466.889	437.263	136.182	139.509	145.148	180.156	1.51651e-09	-1.37958	3.94425e-12	0.384331	8.81916
WBGene00002163	ist-1	Insulin receptor SubsTrate homolog(ist-1)	800.378	689.455	422.075	349.464	224.029	225.333	185.37	216.562	0.000125353	-1.38321	1.4811e-06	0.383365	3.90187
WBGene00011185	R10D12.1	hypothetical protein(R10D12.1)	431.058	327.56	291.564	334.731	130.932	137.442	138.78	104.339	8.38091e-12	-1.41298	1.4947e-14	0.375535	11.0767
WBGene00001623	glt-5	Amino acid transporter(glt-5)	363.69	388.633	267.905	257.544	123.604	155.588	102.113	89.9489	5.10911e-07	-1.41746	2.43396e-09	0.374371	6.29165
WBGene00007820	clec-199	C-type LECtin(clec-199)	199.26	175.248	145.825	182.567	51.4534	37.8566	70.1758	94.8625	0.000448671	-1.431	6.73489e-06	0.370873	3.34807
WBGene00000749	col-176	COLlagen(col-176)	214.503	253.733	263.368	287.047	91.2219	92.4817	75.5899	109.191	1.69342e-12	-1.44215	2.39095e-15	0.36802	11.7712
WBGene00021875	Y54G2A.10	hypothetical protein(Y54G2A.10)	214.765	144.555	143.988	131.654	38.9137	36.772	76.0096	75.6565	0.00171074	-1.45115	3.76294e-05	0.365729	2.76682
WBGene00007331	pho-11	Putative acid phosphatase 11(pho-11)	4107.59	2619.99	4838.64	5376.85	1513.85	1610.05	1288.94	1681.17	1.15498e-07	-1.45261	4.46302e-10	0.365361	6.93743
WBGene00010686	K08F9.3	hypothetical protein(K08F9.3)	55.79	66.2069	85.4455	91.5172	23.1723	24.8862	32.7333	26.7229	0.00012311	-1.45528	1.42715e-06	0.364685	3.90971
WBGene00018052	F35F10.1	hypothetical protein(F35F10.1)	325.592	185.132	233.276	200.587	105.6	78.9462	86.4313	68.4246	3.22863e-06	-1.46079	1.96736e-08	0.363293	5.49098
WBGene00020566	ttr-7	TransThyretin-Related family domain(ttr-7)	87.567	60.8688	130.025	137.675	33.6411	24.9532	53.8312	33.413	0.00548054	-1.48287	0.000178788	0.357777	2.26118
WBGene00194769	Y32B12C.5	pseudo	241.348	308.53	392.159	387.551	80.7744	83.9456	125.041	164.842	8.38757e-05	-1.51595	8.72602e-07	0.349665	4.07636
WBGene00002200	kin-16	Receptor-like tyrosine-protein kinase kin-16(kin-16)	295.307	262.465	361.831	370.625	68.2311	89.2887	151.669	125.476	1.46198e-05	-1.54094	1.14073e-07	0.343661	4.83506
WBGene00011699	cyp-34A2	CYtochrome P450 family(cyp-34A2)	545.748	373.353	208.146	197.25	158.073	105.338	113.117	69.7904	0.00506737	-1.54322	0.000158908	0.343118	2.29522
WBGene00017756	F23F12.12	hypothetical protein(F23F12.12)	446.086	476.962	940.153	1093.53	172.842	184.707	303.487	330.71	0.00235454	-1.54841	5.61647e-05	0.341886	2.62809
WBGene00008341	ttr-44	TransThyretin-Related family domain(ttr-44)	2069.51	2200.4	1457.48	1560.52	609.774	664.057	553.293	618.39	1.96638e-18	-1.54967	1.31511e-21	0.341588	17.7063
WBGene00013046	Y50E8A.1	hypothetical protein(Y50E8A.1)	155.895	122.357	197.206	190.189	47.2681	57.0707	62.8468	55.4618	2.04638e-08	-1.55564	6.53892e-11	0.340178	7.68901
WBGene00006366	sym-1	hypothetical protein(sym-1)	889.897	746.235	363.329	339.114	203.126	211.42	192.701	169.54	0.000356718	-1.56394	5.11605e-06	0.338226	3.44767
WBGene00011397	T03E6.8	hypothetical protein(T03E6.8)	201.947	229.092	348.579	314.132	80.7492	71.0724	90.1666	115.776	7.44062e-07	-1.58878	3.68719e-09	0.332452	6.12839
WBGene00020593	ugt-11	UDP-GlucuronosylTransferase(ugt-11)	78.1062	34.7587	67.3976	82.1462	21.067	17.4019	24.4684	21.9292	0.00127018	-1.5997	2.56735e-05	0.329946	2.89614
WBGene00000906	daf-10	Intraflagellar transport protein 122 homolog(daf-10)	72.4032	54.0401	45.5265	39.5112	15.832	17.3543	13.4381	20.9991	0.000356312	-1.61894	5.08374e-06	0.325574	3.44817
WBGene00021197	Y17G9A.4	hypothetical protein(Y17G9A.4)	635.651	358.751	333.064	438.492	240.102	180.655	78.4566	63.9306	0.00839274	-1.63222	0.000311212	0.322591	2.0761
WBGene00008152	C47E12.9	hypothetical protein(C47E12.9)	144.585	123.65	71.9304	80.8834	26.3397	34.5464	28.0255	43.0394	0.000136458	-1.64664	1.64273e-06	0.319382	3.865
WBGene00019968	R08F11.4	hypothetical protein(R08F11.4)	41.5309	43.0422	23.6682	29.2236	16.7988	8.77229	8.91276	8.51423	0.00581335	-1.65253	0.000193102	0.318082	2.23557
WBGene00006886	vap-1	Venom-Allergen-like Protein(vap-1)	222.405	157.684	161.974	198.612	33.7026	22.8794	106.97	59.2938	0.00965558	-1.69884	0.000381166	0.308033	2.01522
WBGene00016052	dod-3	Downstream Of DAF-16 (regulated by DAF-16)(dod-3)	962.678	1005.95	941.851	787.558	298.329	319.676	199.015	278.863	1.27207e-20	-1.7319	3.78113e-24	0.301056	19.8955
WBGene00020386	cyp-34A4	CYtochrome P450 family(cyp-34A4)	323.225	110.191	362.756	574.162	100.625	64.6822	140.643	90.9073	0.00811411	-1.76004	0.000296659	0.295241	2.09076
WBGene00011340	ugt-30	UDP-glucuronosyltransferase(ugt-30)	48.0853	69.476	83.6098	83.0587	8.56237	16.3457	30.0011	25.7763	0.00253781	-1.78373	6.12906e-05	0.290432	2.59554
WBGene00012404	Y6G8.2	hypothetical protein(Y6G8.2)	307.784	305.781	418.888	339.327	56.6176	80.6088	93.9583	153.783	4.22665e-06	-1.81041	2.85137e-08	0.28511	5.374
WBGene00013905	ugt-4	UDP-glucuronosyltransferase(ugt-4)	1451.28	1253.19	882.033	966.092	342.273	386.126	272.233	243.35	4.44403e-14	-1.84913	4.95359e-17	0.277559	13.3522
WBGene00010422	H32K16.2	hypothetical protein(H32K16.2)	575.162	617.21	605.937	587.575	155.041	232.816	130.403	126.364	4.10408e-17	-1.86977	3.04978e-20	0.273618	16.3868
WBGene00021135	W10G11.2	hypothetical protein(W10G11.2)	184.78	134.255	233.24	228.813	57.7195	60.2991	36.1802	43.9201	1.03993e-09	-1.96119	2.47291e-12	0.256817	8.98299
WBGene00077764	F59C6.16	hypothetical protein(F59C6.16)	907.597	700.976	2454.55	2306.62	244	220.13	527.602	587.676	0.00320628	-1.98366	8.36296e-05	0.252848	2.494
WBGene00007509	C10C5.5	Aminoacylase-1(C10C5.5)	325.2	168.078	608.475	654.437	74.643	88.2576	141.312	124.881	0.000602937	-2.01007	9.72262e-06	0.248261	3.21973
WBGene00020587	ugt-9	UDP-GlucuronosylTransferase(ugt-9)	29.7913	24.0579	58.8769	88.3681	15.6654	7.75989	13.4634	11.5495	0.00718336	-2.0435	0.000253556	0.242575	2.14367
WBGene00015889	C17C3.3	hypothetical protein(C17C3.3)	50.1751	30.8756	59.0328	47.2183	9.56597	7.74919	14.4096	12.3435	5.3134e-05	-2.05189	5.25141e-07	0.241168	4.27463
WBGene00007867	C32H11.4	hypothetical protein(C32H11.4)	326.161	351.9	340.056	308.477	54.6404	77.5119	61.7782	119.723	5.86532e-12	-2.0524	1.00247e-14	0.241083	11.2317
WBGene00012070	T26H5.8	hypothetical protein(T26H5.8)	99.3324	83.4991	76.8664	72.5526	8.56828	11.0232	25.3491	21.9109	3.18808e-06	-2.26975	1.91896e-08	0.207366	5.49647
WBGene00008634	F10A3.4	hypothetical protein(F10A3.4)	119.585	105.71	80.6163	66.7976	19.0153	23.8421	9.67857	21.8976	8.18514e-08	-2.30518	3.00911e-10	0.202335	7.08697
WBGene00008905	F17B5.1	hypothetical protein(F17B5.1)	62.7918	57.1262	36.034	38.6434	5.39527	5.61432	7.93732	19.0988	0.000817236	-2.31752	1.42107e-05	0.200613	3.08765
WBGene00012886	Y45F10D.6	hypothetical protein(Y45F10D.6)	129.791	106.171	340.559	318.426	15.9347	19.6714	60.9536	60.2421	0.00175954	-2.47937	3.90159e-05	0.179323	2.7546
WBGene00008647	F10C2.7	hypothetical protein(F10C2.7)	42.2293	51.3143	157.882	144.529	7.53072	4.60344	22.5429	29.5923	0.00921825	-2.58194	0.000356208	0.167016	2.03535
WBGene00021136	W10G11.3	hypothetical protein(W10G11.3)	104.767	68.4032	316.022	307.286	11.7446	16.4492	54.5588	44.8864	0.0040938	-2.60804	0.00011621	0.164022	2.38787
WBGene00017490	pud-2.1	Protein Up-regulated in Daf-2(gf)(pud-2.1)	3735.85	4294.47	1651.22	1961.01	725.148	782.71	233.726	64.9748	0.00176325	-2.67034	3.95706e-05	0.15709	2.75369
WBGene00021222	irld-53	Insulin/EGF-Receptor L Domain protein(irld-53)	38.3651	72.2306	139.132	154.053	14.9051	17.9193	16.0991	13.0208	1.34401e-05	-2.70792	1.0387e-07	0.153051	4.8716
WBGene00021236	pud-1.2	Protein Up-regulated in Daf-2(gf)(pud-1.2)	2517.1	2820.37	844.598	1131.93	471.645	427.629	126.37	49.6302	0.0014211	-2.7484	2.90409e-05	0.148816	2.84738
WBGene00020611	T20D4.5	hypothetical protein(T20D4.5)	24.0159	15.8578	70.3075	73.7191	2.24783	3.46101	5.71099	12.7672	0.00563869	-2.92518	0.000184786	0.131653	2.24882
WBGene00017501	pud-3	Protein Up-regulated in Daf-2(gf)(pud-3)	139.271	93.9291	77.3747	85.2819	22.7528	15.3076	4.19516	0	0.00301346	-3.23392	7.70327e-05	0.10629	2.52094
WBGene00219308	W06G6.20	hypothetical protein(W06G6.20)	36.6558	32.9154	51.4807	51.1628	3.2898	6.65456	3.3709	3.69783	7.07007e-09	-3.32158	1.99645e-11	0.100024	8.15058
WBGene00017499	pud-1.1	Protein Up-regulated in Daf-2(gf)(pud-1.1)	1241.5	1312.67	628.727	754.109	89.5352	147.588	75.7476	26.6189	1.47621e-11	-3.52313	2.74246e-14	0.0869823	10.8309
WBGene00206464	F59C6.18	hypothetical protein(F59C6.18)	25.8141	10.3646	216.042	192.846	9.62562	5.68231	10.5854	11.3183	0.00350756	-3.54347	9.53978e-05	0.085765	2.45499
WBGene00020472	lips-11	LIPaSe related(lips-11)	166.607	108.734	18.3627	11.9794	4.08644	3.11588	9.3787	7.28303	0.00196876	-3.80942	4.5353e-05	0.0713265	2.70581
WBGene00014009	lips-6	LIPaSe related(lips-6)	153.731	97.9577	32.0936	26.1679	4.37137	9.93072	2.39965	3.6671	2.35692e-05	-3.92061	1.99664e-07	0.0660355	4.62766
