# Supplementary material for: NHR-49/PPAR-α and HLH-30/TFEB cooperate for C. elegans host defense via a flavin-containing monooxygenase
Source: eLife. 2021 May 12;10:e62775. doi: 10.7554/eLife.62775 (PMC8139828; doi:10.7554/eLife.62775)
Supplement: Supplementary file 2. [file elife-62775-supp2.xlsx]

## Sheet: Sheet1
Gene Ontology analsysis of differentially expressed genes between wild type C. elegans subjected to fasting (reference condition) or S. aureus infection (experimental condition).
Induced by Infection
source	term_name	term_id	adjusted_p_value	negative_log10_of_adjusted_p_value	term_size	query_size	intersection_size	effective_domain_size	intersections
GO:BP	defense response to other organism	GO:0098542	7.9109e-23	22.1018	440	73	21	46778	WBGENE00021581,WBGENE00013840,WBGENE00014046,WBGENE00012947,WBGENE00021519,WBGENE00008486,WBGENE00016425,WBGENE00009431,WBGENE00008234,WBGENE00022644,WBGENE00021518,WBGENE00015052,WBGENE00010851,WBGENE00016769,WBGENE00007807,WBGENE00014137,WBGENE00009429,WBGENE00022645,WBGENE00019411,WBGENE00003093,WBGENE00017964
GO:BP	response to other organism	GO:0051707	8.70213e-23	22.0604	442	73	21	46778	WBGENE00021581,WBGENE00013840,WBGENE00014046,WBGENE00012947,WBGENE00021519,WBGENE00008486,WBGENE00016425,WBGENE00009431,WBGENE00008234,WBGENE00022644,WBGENE00021518,WBGENE00015052,WBGENE00010851,WBGENE00016769,WBGENE00007807,WBGENE00014137,WBGENE00009429,WBGENE00022645,WBGENE00019411,WBGENE00003093,WBGENE00017964
GO:BP	response to external biotic stimulus	GO:0043207	8.70213e-23	22.0604	442	73	21	46778	WBGENE00021581,WBGENE00013840,WBGENE00014046,WBGENE00012947,WBGENE00021519,WBGENE00008486,WBGENE00016425,WBGENE00009431,WBGENE00008234,WBGENE00022644,WBGENE00021518,WBGENE00015052,WBGENE00010851,WBGENE00016769,WBGENE00007807,WBGENE00014137,WBGENE00009429,WBGENE00022645,WBGENE00019411,WBGENE00003093,WBGENE00017964
GO:BP	response to biotic stimulus	GO:0009607	8.70213e-23	22.0604	442	73	21	46778	WBGENE00021581,WBGENE00013840,WBGENE00014046,WBGENE00012947,WBGENE00021519,WBGENE00008486,WBGENE00016425,WBGENE00009431,WBGENE00008234,WBGENE00022644,WBGENE00021518,WBGENE00015052,WBGENE00010851,WBGENE00016769,WBGENE00007807,WBGENE00014137,WBGENE00009429,WBGENE00022645,WBGENE00019411,WBGENE00003093,WBGENE00017964
GO:BP	defense response	GO:0006952	1.10223e-22	21.9577	447	73	21	46778	WBGENE00021581,WBGENE00013840,WBGENE00014046,WBGENE00012947,WBGENE00021519,WBGENE00008486,WBGENE00016425,WBGENE00009431,WBGENE00008234,WBGENE00022644,WBGENE00021518,WBGENE00015052,WBGENE00010851,WBGENE00016769,WBGENE00007807,WBGENE00014137,WBGENE00009429,WBGENE00022645,WBGENE00019411,WBGENE00003093,WBGENE00017964
GO:BP	innate immune response	GO:0045087	1.66736e-20	19.778	324	87	19	46778	WBGENE00021581,WBGENE00013840,WBGENE00012947,WBGENE00021519,WBGENE00008486,WBGENE00016425,WBGENE00009431,WBGENE00008234,WBGENE00022644,WBGENE00021518,WBGENE00010851,WBGENE00016769,WBGENE00007807,WBGENE00014137,WBGENE00009429,WBGENE00022645,WBGENE00019411,WBGENE00017964,WBGENE00019779
GO:BP	immune response	GO:0006955	2.81268e-20	19.5509	333	87	19	46778	WBGENE00021581,WBGENE00013840,WBGENE00012947,WBGENE00021519,WBGENE00008486,WBGENE00016425,WBGENE00009431,WBGENE00008234,WBGENE00022644,WBGENE00021518,WBGENE00010851,WBGENE00016769,WBGENE00007807,WBGENE00014137,WBGENE00009429,WBGENE00022645,WBGENE00019411,WBGENE00017964,WBGENE00019779
GO:BP	immune system process	GO:0002376	3.15287e-20	19.5013	335	87	19	46778	WBGENE00021581,WBGENE00013840,WBGENE00012947,WBGENE00021519,WBGENE00008486,WBGENE00016425,WBGENE00009431,WBGENE00008234,WBGENE00022644,WBGENE00021518,WBGENE00010851,WBGENE00016769,WBGENE00007807,WBGENE00014137,WBGENE00009429,WBGENE00022645,WBGENE00019411,WBGENE00017964,WBGENE00019779
GO:BP	multi-organism process	GO:0051704	3.34081e-19	18.4761	770	73	22	46778	WBGENE00021581,WBGENE00013840,WBGENE00014046,WBGENE00012947,WBGENE00021519,WBGENE00008486,WBGENE00016425,WBGENE00009431,WBGENE00008234,WBGENE00022644,WBGENE00021518,WBGENE00015052,WBGENE00010851,WBGENE00016769,WBGENE00007807,WBGENE00014137,WBGENE00009429,WBGENE00022645,WBGENE00019411,WBGENE00003093,WBGENE00004859,WBGENE00017964
GO:BP	defense response to bacterium	GO:0042742	2.67689e-06	5.57237	164	105	8	46778	WBGENE00021581,WBGENE00014046,WBGENE00009431,WBGENE00015052,WBGENE00009429,WBGENE00003093,WBGENE00019779,WBGENE00008132
GO:BP	response to bacterium	GO:0009617	2.80811e-06	5.55159	165	105	8	46778	WBGENE00021581,WBGENE00014046,WBGENE00009431,WBGENE00015052,WBGENE00009429,WBGENE00003093,WBGENE00019779,WBGENE00008132
GO:BP	defense response to Gram-positive bacterium	GO:0050830	6.00973e-06	5.22115	66	105	6	46778	WBGENE00021581,WBGENE00014046,WBGENE00015052,WBGENE00009429,WBGENE00003093,WBGENE00008132
Induced by Starvation
source	term_name	term_id	adjusted_p_value	negative_log10_of_adjusted_p_value	term_size	query_size	intersection_size	effective_domain_size	intersections
GO:BP	primary metabolic process	GO:0044238	9.40719e-12	11.0265	4752	181	56	46778	WBGENE00015350,WBGENE00000901,WBGENE00013899,WBGENE00015802,WBGENE00001502,WBGENE00006603,WBGENE00007480,WBGENE00001403,WBGENE00010703,WBGENE00020930,WBGENE00015551,WBGENE00020436,WBGENE00004024,WBGENE00011392,WBGENE00011283,WBGENE00020114,WBGENE00000437,WBGENE00016266,WBGENE00011755,WBGENE00004182,WBGENE00000908,WBGENE00012364,WBGENE00016269,WBGENE00011235,WBGENE00011095,WBGENE00010681,WBGENE000…
GO:BP	neuropeptide signaling pathway	GO:0007218	7.83623e-08	7.10589	133	175	10	46778	WBGENE00016028,WBGENE00003765,WBGENE00011392,WBGENE00001452,WBGENE00001464,WBGENE00001461,WBGENE00001448,WBGENE00001459,WBGENE00008820,WBGENE00003749
GO:BP	alpha-amino acid catabolic process	GO:1901606	2.716e-07	6.56607	38	206	7	46778	WBGENE00015802,WBGENE00007480,WBGENE00020436,WBGENE00016201,WBGENE00015783,WBGENE00010456,WBGENE00008435
GO:BP	cellular amino acid catabolic process	GO:0009063	3.98249e-07	6.39984	40	206	7	46778	WBGENE00015802,WBGENE00007480,WBGENE00020436,WBGENE00016201,WBGENE00015783,WBGENE00010456,WBGENE00008435
GO:BP	organonitrogen compound catabolic process	GO:1901565	7.97252e-07	6.0984	492	240	17	46778	WBGENE00015802,WBGENE00007480,WBGENE00015551,WBGENE00020436,WBGENE00020114,WBGENE00011095,WBGENE00016201,WBGENE00016133,WBGENE00015434,WBGENE00015783,WBGENE00010456,WBGENE00021095,WBGENE00019105,WBGENE00008435,WBGENE00000963,WBGENE00010686,WBGENE00018052
GO:BP	carboxylic acid catabolic process	GO:0046395	9.23089e-07	6.03476	82	266	9	46778	WBGENE00015802,WBGENE00007480,WBGENE00020436,WBGENE00016201,WBGENE00008567,WBGENE00015783,WBGENE00010456,WBGENE00008435,WBGENE00015889
GO:BP	organic acid catabolic process	GO:0016054	9.23089e-07	6.03476	82	266	9	46778	WBGENE00015802,WBGENE00007480,WBGENE00020436,WBGENE00016201,WBGENE00008567,WBGENE00015783,WBGENE00010456,WBGENE00008435,WBGENE00015889
GO:BP	small molecule catabolic process	GO:0044282	9.23418e-07	6.0346	113	266	10	46778	WBGENE00015802,WBGENE00007480,WBGENE00015551,WBGENE00020436,WBGENE00016201,WBGENE00008567,WBGENE00015783,WBGENE00010456,WBGENE00008435,WBGENE00015889
GO:BP	catabolic process	GO:0009056	1.70768e-06	5.76759	850	277	23	46778	WBGENE00015802,WBGENE00007480,WBGENE00020930,WBGENE00015551,WBGENE00020436,WBGENE00020114,WBGENE00011095,WBGENE00016201,WBGENE00016133,WBGENE00004036,WBGENE00015434,WBGENE00008567,WBGENE00015783,WBGENE00010456,WBGENE00021095,WBGENE00008607,WBGENE00019105,WBGENE00008435,WBGENE00000963,WBGENE00010686,WBGENE00018052,WBGENE00015889,WBGENE00020611
GO:BP	dauer larval development	GO:0040024	9.07867e-06	5.04198	114	11	4	46778	WBGENE00015350,WBGENE00000901,WBGENE00002100,WBGENE00001502
GO:BP	carbohydrate derivative catabolic process	GO:1901136	9.27843e-06	5.03253	102	277	9	46778	WBGENE00015551,WBGENE00020114,WBGENE00011095,WBGENE00016133,WBGENE00015434,WBGENE00021095,WBGENE00010686,WBGENE00018052,WBGENE00020611
GO:BP	organic substance biosynthetic process	GO:1901576	0.000124645	3.90432	2214	98	19	46778	WBGENE00000929,WBGENE00000901,WBGENE00013899,WBGENE00015802,WBGENE00001502,WBGENE00006603,WBGENE00007480,WBGENE00020930,WBGENE00015551,WBGENE00004024,WBGENE00020114,WBGENE00000437,WBGENE00000908,WBGENE00016269,WBGENE00003728,WBGENE00012717,WBGENE00001631,WBGENE00021403,WBGENE00011097
GO:BP	oxidation-reduction process	GO:0055114	0.000836301	3.07764	662	257	16	46778	WBGENE00000929,WBGENE00010703,WBGENE00011003,WBGENE00016266,WBGENE00001476,WBGENE00013650,WBGENE00016201,WBGENE00008567,WBGENE00015043,WBGENE00015783,WBGENE00017536,WBGENE00000118,WBGENE00018262,WBGENE00000111,WBGENE00011699,WBGENE00020386
GO:BP	aromatic amino acid family catabolic process	GO:0009074	0.00179333	2.74634	14	86	3	46778	WBGENE00015802,WBGENE00020436,WBGENE00016201
GO:BP	cellular lipid catabolic process	GO:0044242	0.00216915	2.66371	68	266	6	46778	WBGENE00011095,WBGENE00016133,WBGENE00004036,WBGENE00008567,WBGENE00021095,WBGENE00015889
GO:BP	lipid catabolic process	GO:0016042	0.00221916	2.65381	106	170	6	46778	WBGENE00011095,WBGENE00016133,WBGENE00004036,WBGENE00008567,WBGENE00021095,WBGENE00008607
GO:BP	nematode larval development	GO:0002119	0.00234178	2.63045	457	11	4	46778	WBGENE00015350,WBGENE00000901,WBGENE00002100,WBGENE00001502
