# Supplementary material for: NHR-49/PPAR-α and HLH-30/TFEB cooperate for C. elegans host defense via a flavin-containing monooxygenase
Source: eLife. 2021 May 12;10:e62775. doi: 10.7554/eLife.62775 (PMC8139828; doi:10.7554/eLife.62775)
Supplement: Supplementary file 3. [file elife-62775-supp3.xlsx]

## Sheet: up+down_hlh-30(-)_Starv_v_Saur
ID	Gene	Annotation	counts.hSn1	counts.hSn2	counts.hSn3	counts.hSn4	counts.hSh1	counts.hSh2	counts.hSh3	counts.hSh4	padj	log2FoldChange	pvalue	foldChange	log10padj
WBGene00001477	fmo-2	Dimethylaniline monooxygenase [N-oxide-forming](fmo-2)	44.8563	64.1791	18.5485	21.4167	8013.29	7640.88	3482.77	3739.19	3.05324e-53	7.27823	1.96907e-57	155.226	52.5152
WBGene00017695	fip-1	Fungus-induced protein 1(fip-1)	1.75253	4.96329	0.607778	0.49967	25.0981	9.00828	65.9169	83.0891	0.0012554	4.6427	2.91464e-06	24.9799	2.90122
WBGene00045096	K01A6.7	hypothetical protein(K01A6.7)	34.9624	34.4209	14.0708	16.208	103.254	87.1437	141.122	84.139	3.06454e-05	2.08455	4.32462e-08	4.24142	4.51364
WBGene00018601	F48C1.9	hypothetical protein(F48C1.9)	13.78	23.0948	17.7742	25.1983	72.792	36.2102	98.3768	95.3565	0.00358198	1.92578	1.13193e-05	3.79941	2.44588
WBGene00012947	Y47H9C.1	hypothetical protein(Y47H9C.1)	186.635	117.319	87.4363	95.4764	517.611	410.269	346.595	441.154	2.99387e-08	1.82635	2.51002e-11	3.54639	7.52377
WBGene00015046	nlp-34	Neuropeptide-Like Protein(nlp-34)	140.667	194.138	101.954	92.8145	420.886	229.562	548.425	579.364	0.00125848	1.76139	3.00296e-06	3.39024	2.90015
WBGene00010647	K08C7.4	hypothetical protein(K08C7.4)	11.1759	15.0197	11.5258	10.2255	39.0272	32.6422	52.1106	33.7543	0.000549264	1.72641	1.20437e-06	3.30903	3.26022
WBGene00016929	C54F6.12	hypothetical protein(C54F6.12)	33.6923	22.0328	30.5351	27.8119	112.769	61.1194	78.3018	79.8352	0.000185629	1.54344	3.19505e-07	2.91489	3.73136
WBGene00007890	C33A12.19	hypothetical protein(C33A12.19)	298.301	279.308	276.054	323.929	980.494	670.513	841.629	888.613	4.0078e-18	1.52305	7.75402e-22	2.87398	17.3971
WBGene00015052	clec-52	C-type LECtin(clec-52)	315.783	389.18	344.022	483.954	762.868	656.567	1454.53	1482.27	0.00264102	1.51363	7.32386e-06	2.85527	2.57823
WBGene00020149	T01D1.4	1,2-dihydroxy-3-keto-5-methylthiopentene dioxygenase homolog 1(T01D1.4)	432.252	405.075	675.147	576.154	1021.33	1147.62	1073.81	1229.23	5.62863e-05	1.09292	8.71193e-08	2.13306	4.2496
WBGene00019388	K04F1.9	hypothetical protein(K04F1.9)	938.039	876.174	627.77	742.66	1818.89	1724.31	1561.8	1432.72	2.61989e-09	1.03975	1.52064e-12	2.05587	8.58172
WBGene00022181	pho-9	intestinal acid PHOsphatase(pho-9)	505.614	530.682	631.596	531.148	1055.12	1184.71	1114.63	975.538	2.54684e-14	0.97275	6.56994e-18	1.96258	13.594
WBGene00001478	fmo-3	Dimethylaniline monooxygenase [N-oxide-forming](fmo-3)	252.737	232.531	141.911	197.104	420.909	337.402	386.515	383.415	0.00236557	0.898336	6.40746e-06	1.86392	2.62606
WBGene00001784	gst-36	Probable glutathione S-transferase gst-36(gst-36)	832.503	810.466	738.039	813.024	1284.03	1145.48	1289.4	1130.91	2.56883e-09	0.603746	1.32534e-12	1.51966	8.59026
WBGene00004358	rhr-1	RH (Rhesus) antigen Related(rhr-1)	3078.66	2998.16	2377.32	2833.7	4998.18	4302.27	3909.53	3923.41	0.000275074	0.602519	5.14455e-07	1.51837	3.56055
WBGene00012961	Y47H10A.5	hypothetical protein(Y47H10A.5)	900.077	955.346	977.931	788.577	1256.11	1411.01	1315.42	1496.44	2.02358e-05	0.597632	2.47956e-08	1.51323	4.69388
WBGene00008435	glna-2	GLutamiNAse(glna-2)	379.026	391.765	373.604	403.122	265.369	231.805	257.524	274.336	8.68779e-06	-0.586654	1.00851e-08	0.665886	5.06109
WBGene00015270	C01B4.6	Aldose 1-epimerase(C01B4.6)	510.178	415.654	416.192	412.68	295.937	337.592	272.529	253.878	0.000881728	-0.599812	1.99023e-06	0.65984	3.05467
WBGene00000118	alh-12	ALdehyde deHydrogenase(alh-12)	984.764	985.522	1009.06	1135.75	700.835	611.921	686.199	659.077	1.17843e-07	-0.631272	1.06398e-10	0.645607	6.9287
WBGene00021893	ndnf-1	NDNF (Neuron Derived Neurotrophic Factor) homolog(ndnf-1)	370.781	387.256	415.42	397.809	268.637	245.973	267.295	230.948	9.5899e-07	-0.636759	9.89542e-10	0.643156	6.01819
WBGene00007521	C11E4.7	hypothetical protein(C11E4.7)	363.718	365.822	438.143	424.345	244.686	220.911	255.741	281.413	0.00147551	-0.666787	3.61598e-06	0.629908	2.83106
WBGene00012085	T27D12.1	hypothetical protein(T27D12.1)	2119.95	2001.65	2066.12	1583.14	1141.83	1004.1	1333.69	1149.78	0.000185629	-0.744145	3.23228e-07	0.597022	3.73136
WBGene00012445	Y16B4A.2	Carboxypeptidase(Y16B4A.2)	4689.3	3824.61	2781.85	3255.42	2116.44	2043.9	2381.41	2029.71	0.00346046	-0.759281	1.04812e-05	0.590791	2.46087
WBGene00010422	H32K16.2	hypothetical protein(H32K16.2)	544.158	523.877	351.737	340.25	269.756	254.719	221.069	209.673	0.00585029	-0.879687	1.92419e-05	0.543485	2.23282
WBGene00000515	ckc-1	Choline Kinase C(ckc-1)	75.4451	86.7349	73.6268	64.4519	35.1758	42.7781	44.9881	37.668	0.00667269	-0.896673	2.28075e-05	0.537124	2.1757
WBGene00194769	Y32B12C.5	pseudo	191.656	201.334	213.348	219.058	82.2035	94.2404	129.143	108.265	6.7404e-05	-0.989427	1.08674e-07	0.503678	4.17131
WBGene00016595	C42D4.2	hypothetical protein(C42D4.2)	136.205	174.045	188.068	174.064	68.0001	83.2747	100.777	79.9742	0.000213538	-1.01724	3.85596e-07	0.49406	3.67053
WBGene00021135	W10G11.2	hypothetical protein(W10G11.2)	145.207	131.167	149.923	137.831	66.8441	66.9008	63.4149	80.0911	2.56821e-07	-1.02271	2.4844e-10	0.492191	6.59037
WBGene00007331	pho-11	Putative acid phosphatase 11(pho-11)	916.878	753.349	980.426	1103.66	495.738	451.407	412.363	391.55	3.17811e-09	-1.10526	2.0496e-12	0.46482	8.49783
WBGene00016174	C27H5.4	hypothetical protein(C27H5.4)	518.02	502.184	430.735	372.121	207.468	184.951	227.302	204.296	1.03026e-10	-1.14032	4.65097e-14	0.45366	9.98705
WBGene00013996	ZK550.2	hypothetical protein(ZK550.2)	1052.81	1161.54	776.944	818.222	336.558	335.742	582.61	460.374	0.00169277	-1.14293	4.25757e-06	0.45284	2.7714
WBGene00010123	F55G11.2	hypothetical protein(F55G11.2)	69.9967	91.5042	102.765	131.301	49.3343	45.0428	38.5917	46.4724	0.00557081	-1.1464	1.79634e-05	0.45175	2.25408
WBGene00016052	dod-3	Downstream Of DAF-16 (regulated by DAF-16)(dod-3)	521.533	512.429	421.82	280.187	160.816	167.49	248.66	199.097	0.00346046	-1.15444	1.0489e-05	0.44924	2.46087
WBGene00011397	T03E6.8	hypothetical protein(T03E6.8)	147.621	133.5	168.962	181.368	70.0466	44.1006	83.902	68.4827	0.000509402	-1.24003	1.05126e-06	0.423363	3.29294
WBGene00018885	drd-5	dietary restriction down regulated(drd-5)	279.711	239.651	199.605	221.633	109.405	93.1766	78.3518	96.6911	6.17041e-11	-1.31585	2.38762e-14	0.401689	10.2097
WBGene00009773	lipl-2	Lipase(lipl-2)	429.69	467.544	192.066	223.032	129.107	120.502	104.913	86.824	0.00181104	-1.56958	4.67186e-06	0.336907	2.74207
WBGene00043980	F11D5.7	hypothetical protein(F11D5.7)	29.5962	23.645	28.9903	36.4366	8.94137	11.0989	3.66572	8.98709	0.0034808	-1.89336	1.07751e-05	0.26918	2.45832
WBGene00012308	oac-53	O-ACyltransferase homolog(oac-53)	61.8254	45.0627	61.2512	49.7241	18.7944	17.733	6.63915	12.8415	2.08062e-05	-1.97641	2.68363e-08	0.254122	4.68181
WBGene00021236	pud-1.2	Protein Up-regulated in Daf-2(gf)(pud-1.2)	3142.13	4053.59	2003.36	2292.16	823.341	899.714	713.278	465.934	5.19912e-09	-1.98615	3.68827e-12	0.252412	8.28407
WBGene00017490	pud-2.1	Protein Up-regulated in Daf-2(gf)(pud-2.1)	5857.97	4923.96	3394.02	3342.86	1103.85	1091.64	815.96	604.786	2.92698e-14	-2.27718	9.43823e-18	0.2063	13.5336
WBGene00017498	pud-4	Protein Up-regulated in Daf-2(gf)(pud-4)	350.697	248.928	182.329	197.82	86.3567	53.6383	45.0099	17.016	0.000373344	-2.29352	7.46399e-07	0.203977	3.42789
WBGene00008634	F10A3.4	hypothetical protein(F10A3.4)	122.048	113.701	105.592	109.031	39.5647	27.6715	15.4093	8.26381	3.06454e-05	-2.32481	4.34798e-08	0.199601	4.51364
WBGene00017499	pud-1.1	Protein Up-regulated in Daf-2(gf)(pud-1.1)	2599.81	1377.62	1171.52	668.808	373.691	200.057	148.114	167.299	4.19767e-06	-2.71081	4.60212e-09	0.152744	5.37699
WBGene00017501	pud-3	Protein Up-regulated in Daf-2(gf)(pud-3)	453.441	351.215	428.728	456.899	41.0699	30.3306	56.5304	39.0551	3.54462e-44	-3.33429	4.57193e-48	0.0991467	43.4504
WBGene00018459	F45D11.14	hypothetical protein(F45D11.14)	1103.65	1198.77	3716.29	4464.84	257.966	205.903	254.389	320.542	2.19061e-08	-3.34345	1.6953e-11	0.0985191	7.65944

## Sheet: Overlap_UP_WT_v_hlh-30(-)
Wild type ONLY	hlh-30(-) ONLY	Wild type & hlh-30(-)
aagr-2	F48C1.9	C33A12.19
acl-1	fip-1	C54F6.12
act-5	fmo-3	clec-52
aex-4	gst-36	fmo-2
aman-3	K01A6.7	K08C7.4
bcat-1	K04F1.9	Y47H9C.1
C17C3.1	nlp-34
C18D11.6	pho-9
C29F3.7	rhr-1
C34H4.2	T01D1.4
C46H11.2	Y47H10A.5
C49C8.5
C50F4.9
C50F7.5
clec-187
clec-204
clec-60
clec-70
cyp-29A2
D1053.3
dct-17
del-5
dhs-20
dod-19
drd-1
ech-9
endu-2
F07C6.2
F11C7.6
F13C5.1
F14E5.1
F17C11.12
F22E5.1
F28H7.3
F31F7.1
F42A10.7
F42H10.6
F52H2.3
F54D7.2
F55G1.15
fbxa-151
fbxa-87
flr-4
gale-1
gba-1
gbh-1
glct-6
H02F09.3
H11E01.2
H43E16.1
hmit-1.1
hpo-6
hsp-17
ifc-2
ifd-2
ifo-1
irg-5
K01F9.2
K05F1.10
K10C2.1
kreg-1
lact-3
lys-4
M04C3.2
M28.8
mpk-2
ncx-6
nhx-2
oac-31
pals-39
pho-1
pmp-1
R09E10.13
rege-1
sma-5
smd-1
spp-23
sptl-2
srg-31
srr-6
T05F1.9
T07G12.5
T16G1.4
T23F4.2
ugt-16
ugt-18
ugt-44
W04C9.6
Y102A11A.3
Y37E3.11
Y37H2A.14
Y39B6A.1
Y41D4B.17
Y45G12B.3
Y54G2A.45
Y65B4BR.1
ZK1290.14
ZK1290.5
ZK6.11
