# Supplementary material for: NHR-49/PPAR-α and HLH-30/TFEB cooperate for C. elegans host defense via a flavin-containing monooxygenase
Source: eLife. 2021 May 12;10:e62775. doi: 10.7554/eLife.62775 (PMC8139828; doi:10.7554/eLife.62775)
Supplement: Supplementary file 4. [file elife-62775-supp4.xlsx]

## Sheet: up+down_nhr-49(-)_Starv_v_Saur
ID	Gene	Annotation	counts.NHRstarv1	counts.NHRstarv2	counts.NHRstarv3	counts.NHRstarv4	counts.NHRsaureus1	counts.NHRsaureus2	counts.NHRsaureus3	counts.NHRsaureus4	padj	log2FoldChange	pvalue	foldChange	log10padj
WBGene00019146	H02F09.3	hypothetical protein(H02F09.3)	8.48727	6.84892	8.06276	12.4516	1408.44	1152.21	1478.56	1263.3	1.11246e-165	7.21397	1.22067e-168	148.464	164.954
WBGene00019145	H02F09.2	hypothetical protein(H02F09.2)	0	0	0	0	15.2367	10.4833	19.1648	19.467	1.51583e-07	6.41968	1.64273e-08	85.6083	6.81935
WBGene00021335	spp-23	SaPosin-like Protein family(spp-23)	6.36545	6.84892	6.04707	6.2258	257.119	222.055	199.314	413.929	1.3258e-49	5.41972	1.47188e-51	42.8055	48.8775
WBGene00014193	nhr-247	Nuclear Hormone Receptor family(nhr-247)	0	0	0	0	3.80918	9.53027	13.4153	4.09831	0.000167428	5.36248	3.20635e-05	41.1403	3.77617
WBGene00017277	F09C12.2	Mitogen-activated protein kinase(F09C12.2)	1.06091	0.978417	1.00784	2.07527	53.3285	42.8862	43.1208	55.3272	1.1127e-12	5.25271	6.79414e-14	38.1263	11.9536
WBGene00235311	Y57E12B.11	hypothetical protein(Y57E12B.11)	0	0	0	0	9.52294	3.81211	5.74943	4.09831	0.000799378	4.94979	0.000183888	30.9056	3.09725
WBGene00011929	T22G5.1	hypothetical protein(T22G5.1)	0	0	0	0	0.952294	6.67119	15.3318	0	0.00761367	4.93622	0.00240553	30.6162	2.11841
WBGene00012081	T27C5.8	hypothetical protein(T27C5.8)	5.30454	5.8705	6.04707	8.30106	161.89	182.028	195.481	133.195	5.10439e-43	4.72162	6.58928e-45	26.3845	42.2921
WBGene00022886	ZK1290.1	hypothetical protein(ZK1290.1)	0	0.978417	0	0	1.90459	11.4363	12.4571	1.02458	0.00499046	4.44025	0.00147688	21.7094	2.30186
WBGene00045012	K08F4.13	pseudo	1.06091	0	0	0	6.66606	3.81211	5.74943	10.2458	0.00190298	4.41482	0.000492052	21.3301	2.72056
WBGene00009431	dct-17	DAF-16/FOXO Controlled, germline Tumor affecting(dct-17)	70.02	56.7482	54.4236	53.9569	1223.7	1124.57	1257.21	1129.08	1.49089e-283	4.33414	7.69838e-287	20.17	282.827
WBGene00012500	hpo-2	hypothetical protein(hpo-2)	1.06091	0.978417	0	1.03763	0	20.9666	23.956	7.17204	0.00213102	4.08779	0.000557754	17.0039	2.67141
WBGene00021109	W09C3.1	hypothetical protein(W09C3.1)	0	0	0	2.07527	19.0459	8.57724	3.83296	3.07373	0.00542703	4.07846	0.00162639	16.8942	2.26544
WBGene00045096	K01A6.7	hypothetical protein(K01A6.7)	3.18273	1.95683	4.03138	4.15053	51.4239	54.3225	57.4943	53.278	2.07796e-16	4.02816	9.28128e-18	16.3153	15.6824
WBGene00021519	Y41D4B.17	hypothetical protein(Y41D4B.17)	22.2791	14.6763	13.102	21.7903	269.499	265.894	314.302	297.127	3.48833e-77	4.00337	1.91382e-79	16.0374	76.4574
WBGene00016845	C50F7.5	hypothetical protein(C50F7.5)	1466.18	1340.43	1396.87	1893.68	25024.4	23444.5	23912.9	23950.5	0	3.9821	0	15.8027	Inf
WBGene00011187	R10D12.6	hypothetical protein(R10D12.6)	1.06091	0	1.00784	1.03763	11.4275	19.0605	9.58239	6.14746	0.000519569	3.91557	0.000113653	15.0905	3.28436
WBGene00001158	ech-9	Enoyl-CoA Hydratase(ech-9)	25.4618	45.0072	60.4707	60.1827	543.76	518.446	672.684	910.849	2.39748e-32	3.78981	4.45669e-34	13.8308	31.6202
WBGene00007864	irg-6	hypothetical protein(C32H11.1)	89.1163	79.2518	90.706	133.855	1187.51	1071.2	1209.3	1391.38	2.74573e-166	3.6302	2.83559e-169	12.3823	165.561
WBGene00012947	Y47H9C.1	hypothetical protein(Y47H9C.1)	55.1672	65.5539	57.4472	50.844	661.844	614.702	805.879	738.72	2.06311e-144	3.62034	2.79644e-147	12.2979	143.685
WBGene00000551	clx-1	CoLlagen sequence X-hybridizing(clx-1)	2.12182	1.95683	0	5.18816	22.8551	20.9666	23.956	37.9094	1.64197e-07	3.51926	1.79108e-08	11.4658	6.78464
WBGene00202498	Y60C6A.2	hypothetical protein(Y60C6A.2)	1.06091	1.95683	0	1.03763	11.4275	13.3424	13.4153	7.17204	0.000541908	3.47862	0.000119029	11.1473	3.26607
WBGene00005188	srg-31	Serpentine receptor class gamma-31(srg-31)	8.48727	6.84892	3.02353	2.07527	69.5175	55.2755	53.6614	47.1305	2.55263e-15	3.46727	1.23076e-16	11.06	14.593
WBGene00018725	kreg-1	Protein kreg-1(kreg-1)	51.9845	111.54	58.455	81.973	780.881	1024.5	1019.57	533.805	1.79042e-25	3.46486	4.62253e-27	11.0415	24.747
WBGene00018343	F42A10.7	hypothetical protein(F42A10.7)	169.745	92.9496	101.792	120.365	1305.59	1064.53	1093.35	1425.19	1.75305e-54	3.33552	1.67464e-56	10.0947	53.7562
WBGene00008621	F09C8.1	hypothetical protein(F09C8.1)	53.0454	27.3957	33.2589	34.2419	325.685	241.116	269.265	612.697	3.73926e-16	3.29313	1.71118e-17	9.80237	15.4272
WBGene00003605	nhr-6	Nuclear Hormone Receptor family(nhr-6)	117.761	120.345	104.816	134.892	1068.47	1460.04	1468.98	669.049	6.50784e-31	3.28807	1.30636e-32	9.76807	30.1866
WBGene00012467	arrd-8	ARRestin Domain protein(arrd-8)	3.18273	4.89208	8.06276	5.18816	55.233	65.7588	57.4943	28.6882	1.87375e-12	3.27757	1.17072e-13	9.69721	11.7273
WBGene00020859	bath-25	BTB and MATH domain containing(bath-25)	12.7309	26.4173	20.1569	17.6398	182.84	207.76	229.019	126.023	7.15259e-35	3.27098	1.1634e-36	9.653	34.1455
WBGene00009914	F49H6.13	hypothetical protein(F49H6.13)	5.30454	12.7194	9.0706	9.3387	77.1358	99.1148	107.323	58.4009	1.87635e-19	3.22401	6.92748e-21	9.34382	18.7267
WBGene00022644	dod-19	Downstream Of DAF-16 (regulated by DAF-16)(dod-19)	558.038	523.453	501.907	553.058	4442.45	4303.87	5106.46	5096.25	0	3.14917	0	8.87147	Inf
WBGene00002094	ins-11	B-chain-like peptide(ins-11)	23.34	14.6763	14.1098	10.3763	135.226	140.095	144.694	121.925	3.02784e-34	3.12133	5.00308e-36	8.70189	33.5189
WBGene00005657	srr-6	Serpentine Receptor, class R(srr-6)	21.2182	52.8345	55.4315	46.6935	312.352	521.306	499.242	161.883	5.61844e-10	3.08385	4.50767e-11	8.47876	9.25038
WBGene00019273	H43E16.1	hypothetical protein(H43E16.1)	146.405	111.54	90.706	141.118	1010.38	929.201	1154.68	1012.28	3.65016e-134	3.07058	6.59682e-137	8.40113	133.438
WBGene00023483	Y75B8A.39	hypothetical protein(Y75B8A.39)	0	3.91367	5.03922	1.03763	27.6165	19.0605	28.7472	9.22119	3.5742e-05	3.06544	5.86203e-06	8.37126	4.44682
WBGene00000782	cpr-2	Cysteine PRotease related(cpr-2)	7.42636	4.89208	11.0863	4.15053	51.4239	53.3695	72.8262	52.2534	1.44638e-14	3.06115	7.37523e-16	8.3464	13.8397
WBGene00044376	Y49F6B.12	hypothetical protein(Y49F6B.12)	5.30454	5.8705	6.04707	9.3387	60.9468	54.3225	53.6614	46.106	1.39825e-14	3.01962	7.11176e-16	8.10956	13.8544
WBGene00012621	Y38H6C.8	hypothetical protein(Y38H6C.8)	3.18273	2.93525	4.03138	1.03763	15.2367	33.3559	23.956	17.4178	4.06878e-06	3.00559	5.56493e-07	8.03108	5.39054
WBGene00077704	F12A10.9	hypothetical protein(F12A10.9)	2.12182	3.91367	0	1.03763	18.0936	16.2015	14.3736	7.17204	0.00043935	2.97409	9.43753e-05	7.85761	3.35719
WBGene00017678	asp-12	ASpartyl Protease(asp-12)	445.582	509.755	345.691	822.843	4106.29	4003.66	3824.33	4273.51	8.21371e-27	2.93201	2.00399e-28	7.63171	26.0855
WBGene00011494	T05F1.9	hypothetical protein(T05F1.9)	4.24363	7.82734	8.06276	7.26343	48.567	60.0407	54.6196	42.0077	2.48699e-13	2.90058	1.42866e-14	7.46726	12.6043
WBGene00012501	Y26D4A.3	hypothetical protein(Y26D4A.3)	1.06091	2.93525	1.00784	1.03763	13.3321	11.4363	12.4571	8.19662	0.000960243	2.89814	0.000226286	7.45466	3.01762
WBGene00010658	K08D8.4	hypothetical protein(K08D8.4)	178.233	216.23	191.491	236.58	1389.4	1735.46	2028.59	974.373	3.66927e-30	2.89721	7.48396e-32	7.44985	29.4354
WBGene00005586	sri-74	Serpentine Receptor, class I(sri-74)	0	0.978417	3.02353	1.03763	8.57065	12.3893	8.62415	7.17204	0.00401828	2.85511	0.00114612	7.23561	2.39596
WBGene00018209	F39G3.4	hypothetical protein(F39G3.4)	2.12182	11.741	7.05491	7.26343	49.5193	55.2755	71.8679	26.639	1.47598e-09	2.8413	1.248e-10	7.16666	8.83092
WBGene00016164	C27D9.2	hypothetical protein(C27D9.2)	5.30454	0	7.05491	1.03763	30.4734	26.6847	18.2065	19.467	1.47361e-05	2.83366	2.24851e-06	7.12881	4.83162
WBGene00194803	C25F9.16	hypothetical protein(C25F9.16)	0	3.91367	7.05491	4.15053	31.4257	25.7317	29.7054	17.4178	2.61113e-06	2.77605	3.45162e-07	6.84976	5.58317
WBGene00008234	C50F4.9	hypothetical protein(C50F4.9)	136.857	133.065	115.902	132.817	835.162	828.18	933.325	920.07	4.01327e-167	2.76179	3.88557e-170	6.78239	166.397
WBGene00019388	K04F1.9	hypothetical protein(K04F1.9)	137.918	78.2734	99.7766	99.6127	658.035	613.749	700.473	797.121	6.5951e-83	2.73951	3.23519e-85	6.67841	82.1808
WBGene00010899	M28.8	hypothetical protein(M28.8)	157.014	177.093	150.169	191.962	1079.9	1137.91	1295.54	884.21	7.91214e-106	2.70132	2.29811e-108	6.50396	105.102
WBGene00018412	nhr-37	Nuclear Hormone Receptor family(nhr-37)	1.06091	0.978417	2.01569	4.15053	17.1413	17.1545	16.2901	2.04915	0.00313579	2.68968	0.000864048	6.45172	2.50365
WBGene00018707	oac-31	O-ACyltransferase homolog(oac-31)	134.735	89.0359	82.6433	146.306	674.224	846.288	815.461	554.296	1.80333e-52	2.67731	1.81578e-54	6.39663	51.7439
WBGene00002021	hsp-17	Heat Shock Protein(hsp-17)	108.213	118.388	89.6982	97.5375	638.989	579.44	761.8	640.361	1.00202e-98	2.66213	3.4278e-101	6.32966	97.9991
WBGene00044569	C25F6.8	hypothetical protein(C25F6.8)	13.7918	25.4388	14.1098	6.2258	83.8019	87.6784	89.1162	111.679	3.92693e-17	2.63398	1.69315e-18	6.20737	16.4059
WBGene00009756	F46B3.1	hypothetical protein(F46B3.1)	2.12182	2.93525	0	1.03763	9.52294	11.4363	7.66591	9.22119	0.00463462	2.63042	0.00135691	6.19204	2.33399
WBGene00021581	clec-70	C-type LECtin(clec-70)	12.7309	7.82734	8.06276	18.6774	48.567	66.7119	78.5756	95.2857	4.15309e-13	2.61684	2.43132e-14	6.13405	12.3816
WBGene00016425	C34H4.2	hypothetical protein(C34H4.2)	473.165	447.137	377.942	391.188	2584.53	2368.27	2738.65	2541.98	7.82278e-239	2.59898	4.54431e-242	6.05856	238.107
WBGene00003522	nas-3	Zinc metalloproteinase nas-3(nas-3)	6.36545	13.6978	9.0706	6.2258	39.9963	48.6044	61.3273	62.4992	1.98983e-11	2.57636	1.36012e-12	5.96433	10.7012
WBGene00007682	C18D11.6	hypothetical protein(C18D11.6)	27.5836	23.482	29.2275	26.9785	182.84	139.142	151.402	145.49	1.66399e-32	2.53007	3.06516e-34	5.77601	31.7788
WBGene00045416	Y37H2A.14	hypothetical protein(Y37H2A.14)	237.643	242.647	181.412	190.924	1230.36	1250.37	1338.66	1063.51	1.8407e-122	2.51788	3.68306e-125	5.72741	121.735
WBGene00010127	F55G11.7	hypothetical protein(F55G11.7)	16.9745	22.5036	15.1177	19.715	123.798	99.1148	81.4503	121.925	7.50194e-21	2.51744	2.53729e-22	5.72565	20.1248
WBGene00008539	F02H6.6	hypothetical protein(F02H6.6)	7.42636	4.89208	2.01569	5.18816	28.5688	26.6847	32.5801	22.5407	9.64528e-07	2.50756	1.18659e-07	5.68658	6.01569
WBGene00017764	F25A2.1	hypothetical protein(F25A2.1)	2.12182	11.741	7.05491	5.18816	44.7578	30.4968	39.2878	34.8356	5.02875e-08	2.50207	5.13813e-09	5.66499	7.29854
WBGene00021032	clec-118	C-type LECtin(clec-118)	6.36545	0.978417	4.03138	3.1129	23.8073	15.2484	20.123	21.5161	4.7681e-05	2.49109	8.06943e-06	5.62202	4.32165
WBGene00012664	Y39B6A.1	hypothetical protein(Y39B6A.1)	3235.77	2176.98	2224.31	2798.5	13777.8	12202.6	13120.2	19452.6	7.98799e-30	2.48829	1.66535e-31	5.61112	29.0976
WBGene00017948	mth-1	MeTHuselah (Drosophila aging-associated GPCR) homolog(mth-1)	59.4109	43.0503	47.3687	44.6182	219.98	327.841	350.715	174.178	3.01436e-26	2.46622	7.51011e-28	5.52595	25.5208
WBGene00017378	F11C7.6	hypothetical protein(F11C7.6)	62.5936	47.9424	48.3766	53.9569	313.305	287.814	274.056	295.078	8.32639e-60	2.46171	6.93283e-62	5.50869	59.0795
WBGene00017726	F22H10.2	hypothetical protein(F22H10.2)	70.02	99.7985	103.808	104.801	468.529	644.246	594.108	358.602	3.70245e-40	2.44764	5.18577e-42	5.45525	39.4315
WBGene00022638	scl-27	SCP-Like extracellular protein(scl-27)	1.06091	0.978417	3.02353	2.07527	5.71376	10.4833	10.5406	11.2703	0.0065622	2.41056	0.00203054	5.3168	2.18295
WBGene00007807	C29F3.7	hypothetical protein(C29F3.7)	1140.48	921.669	936.288	1108.19	4766.23	4461.12	5546.29	6493.77	3.34961e-57	2.37275	2.94034e-59	5.17929	56.475
WBGene00021118	clec-125	C-type LECtin(clec-125)	6.36545	6.84892	4.03138	2.07527	24.7596	20.0136	37.3713	16.3932	3.29748e-05	2.34946	5.35284e-06	5.09634	4.48182
WBGene00017308	F09F9.3	hypothetical protein(F09F9.3)	2.12182	9.78417	3.02353	2.07527	12.3798	32.4029	30.6636	11.2703	0.000716105	2.33779	0.000162467	5.05529	3.14502
WBGene00013073	hmit-1.1	H(+) MyoInositol coTransporter(hmit-1.1)	276.897	59.6834	86.6747	146.306	696.127	567.051	679.391	913.923	1.18631e-05	2.32702	1.76649e-06	5.01769	4.9258
WBGene00044900	cnc-11	CaeNaCin (Caenorhabditis bacteriocin)(cnc-11)	5.30454	3.91367	2.01569	3.1129	19.0459	19.0605	16.2901	16.3932	0.000158796	2.30796	3.02053e-05	4.95182	3.79916
WBGene00002058	ifd-2	Intermediate filament protein ifd-2(ifd-2)	401.023	498.014	452.522	428.542	2144.57	2544.58	2589.16	1394.45	2.53786e-25	2.28445	6.63417e-27	4.87177	24.5955
WBGene00016785	C49G7.7	hypothetical protein(C49G7.7)	16.9745	27.3957	31.2432	19.715	92.3725	146.766	159.068	64.5484	2.86738e-12	2.27707	1.82855e-13	4.84694	11.5425
WBGene00016788	C49G7.10	hypothetical protein(C49G7.10)	77.4463	125.237	133.036	125.554	471.385	664.26	831.751	265.365	3.22052e-08	2.27493	3.19911e-09	4.83974	7.49207
WBGene00016783	irg-2	Infection Response Gene(irg-2)	23.34	47.9424	34.2667	19.715	125.703	181.075	194.523	99.384	1.57389e-14	2.25727	8.05586e-16	4.78087	13.803
WBGene00009339	F32G8.3	hypothetical protein(F32G8.3)	2.12182	11.741	2.01569	8.30106	26.6642	30.4968	36.4131	22.5407	2.80817e-05	2.25463	4.48966e-06	4.77213	4.55158
WBGene00019564	K09D9.1	hypothetical protein(K09D9.1)	48.8018	103.712	88.6904	79.8977	329.494	486.044	515.533	201.842	1.49199e-08	2.25445	1.41466e-09	4.77151	7.82623
WBGene00206418	M04C3.5	hypothetical protein(M04C3.5)	7.42636	15.6547	28.2197	10.3763	71.422	73.383	80.4921	68.6467	2.05854e-11	2.24598	1.41107e-12	4.74359	10.6864
WBGene00003092	lys-3	Lysozyme-like protein 3(lys-3)	128.37	211.338	200.561	201.301	842.78	1188.42	1043.52	441.593	4.44542e-10	2.24523	3.52351e-11	4.74114	9.35209
WBGene00020792	T25B6.6	hypothetical protein(T25B6.6)	0	5.8705	4.03138	3.1129	15.2367	13.3424	17.2483	16.3932	0.00101516	2.23916	0.000240931	4.72124	2.99346
WBGene00020760	T24C4.4	hypothetical protein(T24C4.4)	126.248	201.554	199.553	130.742	721.839	957.792	910.327	515.362	2.31107e-15	2.23777	1.10982e-16	4.71667	14.6362
WBGene00045411	C25F9.11	hypothetical protein(C25F9.11)	148.527	141.87	141.098	112.064	650.417	608.984	702.389	589.132	1.62364e-88	2.23052	6.91667e-91	4.69304	87.7895
WBGene00005548	sri-36	Serpentine Receptor, class I(sri-36)	9.54818	24.4604	18.1412	12.4516	70.4698	81.9603	102.532	47.1305	2.89685e-10	2.2194	2.2587e-11	4.657	9.53807
WBGene00009907	F49H6.3	hypothetical protein(F49H6.3)	4.24363	2.93525	4.03138	10.3763	19.0459	31.4499	24.9142	23.5653	4.00893e-05	2.20388	6.64231e-06	4.60715	4.39697
WBGene00008167	acox-1.5	Probable peroxisomal acyl-coenzyme A oxidase 5(acox-5)	417.998	269.065	229.789	419.204	1245.6	1242.75	1559.05	2096.28	1.65026e-13	2.20141	9.34152e-15	4.59929	12.7824
WBGene00008988	F20G2.5	hypothetical protein(F20G2.5)	58.35	38.1583	41.3216	50.844	170.461	304.968	296.096	90.1628	1.61358e-06	2.19255	2.06424e-07	4.57113	5.79221
WBGene00005551	sri-38	Serpentine Receptor, class I(sri-39)	3.18273	10.7626	9.0706	7.26343	35.2349	35.262	42.1625	25.6144	8.96193e-07	2.18306	1.09732e-07	4.54115	6.0476
WBGene00045457	F33H12.7	hypothetical protein(F33H12.7)	141.101	224.057	234.828	200.263	902.775	961.604	1095.27	667	1.47865e-42	2.17909	1.95652e-44	4.52868	41.8301
WBGene00009964	fip-6	Fungus-Induced Protein(fip-6)	48.8018	77.2949	60.4707	78.8601	262.833	378.352	346.882	206.965	1.23521e-24	2.16985	3.3326e-26	4.49976	23.9083
WBGene00012594	nspe-5	Nematode Specific Peptide family, group E(nspe-5)	38.1927	9.78417	5.03922	32.1666	115.228	61.9467	85.2833	118.851	0.00192899	2.16533	0.000499898	4.48568	2.71467
WBGene00007672	fbxa-136	F-box A protein(fbxa-136)	3.18273	11.741	7.05491	6.2258	34.2826	42.8862	38.3296	11.2703	9.12436e-05	2.16207	1.64784e-05	4.47556	4.0398
WBGene00077593	C49G7.12	hypothetical protein(C49G7.12)	15.9136	21.5252	13.102	22.8279	60.9468	90.5375	111.156	64.5484	6.77321e-12	2.15688	4.45048e-13	4.4595	11.1692
WBGene00022013	Y60C6A.1	hypothetical protein(Y60C6A.1)	7.42636	24.4604	13.102	23.8656	79.9927	74.3361	74.7426	78.8924	3.06685e-12	2.15491	1.96367e-13	4.45342	11.5133
WBGene00022645	ZK6.11	hypothetical protein(ZK6.11)	701.261	613.467	492.836	608.053	2197.89	2676.1	2878.55	2874.96	1.75192e-91	2.1377	7.01086e-94	4.40059	90.7565
WBGene00007097	B0024.4	hypothetical protein(B0024.4)	137.918	155.568	119.934	167.059	584.708	698.568	674.6	592.206	5.10646e-74	2.13545	2.96638e-76	4.39373	73.2919
WBGene00017095	E02C12.10	hypothetical protein(E02C12.10)	13.7918	27.3957	9.0706	14.5269	79.9927	63.8528	45.9955	90.1628	5.51482e-09	2.10537	4.94778e-10	4.30309	8.25847
WBGene00194928	ZC513.14	hypothetical protein(ZC513.14)	13.7918	15.6547	18.1412	17.6398	79.9927	69.5709	71.8679	58.4009	3.0965e-13	2.10126	1.80278e-14	4.29084	12.5091
WBGene00003571	ncx-6	Putative sodium/calcium exchanger 6(ncx-6)	61.5327	43.0503	45.353	37.3548	201.886	209.666	223.27	157.785	5.94459e-27	2.08465	1.43502e-28	4.24173	26.2259
WBGene00044034	Y38E10A.28	hypothetical protein(Y38E10A.28)	65.7763	25.4388	48.3766	43.5806	202.839	176.31	188.773	203.891	1.44648e-22	2.08043	4.39741e-24	4.22932	21.8397
WBGene00008602	oac-14	O-ACyltransferase homolog(oac-14)	151.71	205.468	184.436	210.639	748.503	911.093	986.986	524.583	2.02985e-18	2.0756	7.96586e-20	4.21518	17.6925
WBGene00007890	C33A12.19	hypothetical protein(C33A12.19)	285.384	163.396	198.545	255.258	999.909	811.026	929.492	1003.06	3.585e-49	2.05426	4.07255e-51	4.15329	48.4455
WBGene00009432	cld-9	Cub (CUB) Like Domain containing protein(cld-9)	354.343	385.496	331.581	355.908	1296.07	1606.8	1786.16	1160.85	2.76218e-62	2.03516	2.15726e-64	4.09868	61.5587
WBGene00023252	C39H7.2	pseudo	11.67	15.6547	9.0706	10.3763	42.8532	50.5104	57.4943	38.9339	1.49403e-08	2.01889	1.41755e-09	4.05271	7.82564
WBGene00003957	pcp-2	Prolyl Carboxy Peptidase like(pcp-2)	127.309	70.446	79.6198	88.1988	303.782	283.049	362.214	514.338	4.1744e-21	2.00263	1.37952e-22	4.0073	20.3794
WBGene00021518	hpo-6	hypothetical protein(hpo-6)	711.87	729.899	600.676	664.085	2499.77	2724.7	3031.87	2555.3	2.78949e-136	1.99813	4.68125e-139	3.99483	135.554
WBGene00005142	srd-65	Serpentine Receptor, class D (delta)(srd-65)	6.36545	3.91367	3.02353	7.26343	19.0459	20.9666	24.9142	16.3932	0.000285077	1.99197	5.80717e-05	3.97779	3.54504
WBGene00008105	C45B11.2	hypothetical protein(C45B11.2)	2.12182	5.8705	9.0706	4.15053	22.8551	20.0136	31.6219	9.22119	0.00141307	1.97576	0.000350257	3.93336	2.84984
WBGene00010851	M04C3.2	hypothetical protein(M04C3.2)	62.5936	52.8345	51.4001	43.5806	173.317	235.398	229.019	187.498	2.49108e-27	1.97292	5.86874e-29	3.92561	26.6036
WBGene00020149	T01D1.4	1,2-dihydroxy-3-keto-5-methylthiopentene dioxygenase homolog 1(T01D1.4)	321.455	272.978	302.353	377.698	1231.32	1085.5	1259.13	1405.72	2.34638e-77	1.96742	1.25702e-79	3.91068	76.6296
WBGene00011190	swt-6	Sugar transporter SWEET(swt-6)	14.8527	6.84892	7.05491	7.26343	28.5688	42.8862	45.9955	22.5407	1.5686e-05	1.96722	2.4056e-06	3.91013	4.80449
WBGene00005422	srh-212	Serpentine Receptor, class H(srh-212)	2.12182	4.89208	1.00784	4.15053	13.3321	13.3424	8.62415	12.2949	0.00764201	1.96183	0.00241597	3.89557	2.11679
WBGene00022891	ZK1290.10	hypothetical protein(ZK1290.10)	14.8527	20.5468	32.251	20.7527	66.6606	105.786	116.905	48.1551	3.37403e-08	1.93187	3.36249e-09	3.81549	7.47185
WBGene00014173	ZK970.7	hypothetical protein(ZK970.7)	355.404	581.18	488.805	463.822	1768.41	2161.46	2044.88	1118.84	5.80205e-13	1.90857	3.43787e-14	3.75436	12.2364
WBGene00000302	cav-2	Caveolin-2(cav-2)	20.1573	33.2662	16.1255	29.0537	90.4679	85.7724	97.7404	95.2857	9.33471e-14	1.90172	5.14545e-15	3.73658	13.0299
WBGene00011725	lips-5	LIPaSe related(lips-5)	31.8273	33.2662	27.2118	33.2042	105.705	116.269	117.863	123.974	3.21218e-19	1.88531	1.20459e-20	3.69432	18.4932
WBGene00043981	T14E8.4	hypothetical protein(T14E8.4)	43.4972	33.2662	45.353	28.0161	139.987	143.907	136.07	129.097	1.50046e-20	1.87204	5.2201e-22	3.66049	19.8238
WBGene00006627	tsp-1	Tetraspanin-1(tsp-1)	201.573	250.475	261.032	251.107	859.921	1091.22	1079.94	488.723	9.77273e-11	1.86811	7.28555e-12	3.65054	10.01
WBGene00045305	ZC250.4	hypothetical protein(ZC250.4)	216.425	210.36	270.102	205.451	816.116	888.221	863.373	722.327	1.73007e-68	1.86642	1.15018e-70	3.64626	67.7619
WBGene00008462	E02H4.4	hypothetical protein(E02H4.4)	24.4009	41.0935	21.1647	43.5806	127.607	97.2087	117.863	131.146	7.03098e-14	1.86079	3.84383e-15	3.63206	13.153
WBGene00008850	F15B9.6	hypothetical protein(F15B9.6)	99.7254	81.2086	76.5962	134.892	313.305	342.137	377.546	384.216	4.9901e-30	1.85451	1.02746e-31	3.6163	29.3019
WBGene00021582	clec-71	C-type LECtin(clec-71)	386.171	382.561	318.479	357.983	1183.7	1160.79	1242.84	1618.83	6.44872e-61	1.84863	5.28618e-63	3.60159	60.1905
WBGene00000191	arl-7	pseudo	8.48727	4.89208	6.04707	10.3763	19.0459	29.5438	32.5801	25.6144	9.86133e-05	1.84759	1.79621e-05	3.59899	4.00606
WBGene00000067	act-5	ACTin(act-5)	2298.99	1949.99	1992.51	2131.3	7287.91	7257.3	7726.28	7528.59	1.38911e-227	1.83193	8.96608e-231	3.56014	226.857
WBGene00016769	C49C8.5	hypothetical protein(C49C8.5)	1471.48	1392.29	1326.32	1386.28	4953.83	4746.07	4984.76	5101.37	1.81744e-295	1.82728	8.21149e-299	3.54868	294.741
WBGene00018210	F39G3.5	hypothetical protein(F39G3.5)	123.065	112.518	107.839	127.629	408.534	451.735	480.078	314.545	1.23579e-34	1.81445	2.02601e-36	3.51725	33.9081
WBGene00012593	nspe-7	Nematode Specific Peptide family, group E(nspe-7)	60.4718	49.8993	25.1961	60.1827	201.886	142.001	140.861	201.842	2.02915e-13	1.81218	1.15779e-14	3.51173	12.6927
WBGene00044479	F15E6.10	hypothetical protein(F15E6.10)	5.30454	6.84892	9.0706	8.30106	27.6165	21.9196	22.9977	30.7373	9.84242e-05	1.80297	1.79213e-05	3.48938	4.0069
WBGene00009428	F35E12.4	pseudo	92.299	111.54	103.808	139.043	356.158	435.533	455.163	287.906	1.31314e-25	1.78116	3.3818e-27	3.43703	24.8817
WBGene00020579	T19D12.4	hypothetical protein(T19D12.4)	955.879	1115.4	982.649	1056.31	3192.09	3816.87	3970.94	3000.99	1.18339e-83	1.76606	5.6523e-86	3.40124	82.9269
WBGene00021580	clec-174	C-type LECtin(clec-174)	124.126	177.093	137.067	180.548	493.288	524.165	581.651	499.994	2.65133e-44	1.76096	3.30964e-46	3.38924	43.5765
WBGene00016669	ilys-2	Invertebrate LYSozyme(ilys-2)	552.733	331.683	336.62	514.666	1596.04	1545.81	1295.54	1431.33	1.02879e-16	1.7581	4.52874e-18	3.38252	15.9877
WBGene00015739	ugt-7	UDP-GlucuronosylTransferase(ugt-7)	112.456	103.712	100.784	98.5751	359.015	328.794	336.342	364.749	3.61646e-47	1.74115	4.29502e-49	3.34302	46.4417
WBGene00010296	dgat-2	acyl-CoA:DiacylGlycerol AcylTransferase(dgat-2)	36.0709	33.2662	30.2353	25.9408	99.0386	138.189	134.153	47.1305	1.05708e-07	1.7392	1.12511e-08	3.33851	6.97589
WBGene00017947	mth-2	MeTHuselah (Drosophila aging-associated GPCR) homolog(mth-2)	197.329	147.741	138.075	153.57	507.573	514.634	577.818	518.436	8.98556e-50	1.73644	9.91758e-52	3.33213	49.0465
WBGene00011830	cyp-29A2	CYtochrome P450 family(cyp-29A2)	40.3145	30.3309	47.3687	26.9785	99.0386	106.739	125.529	150.613	5.27414e-13	1.73198	3.11485e-14	3.32184	12.2778
WBGene00008577	F08G2.5	hypothetical protein(F08G2.5)	50.9236	72.4029	76.5962	93.387	242.835	288.767	293.221	144.465	2.37424e-13	1.72475	1.36236e-14	3.30524	12.6245
WBGene00013955	kri-1	human KRIT 1 (Krev interaction trapped/cerebral cavernous malformation 1) homolog(kri-1)	78.5072	56.7482	50.3922	69.5214	215.218	200.136	216.562	209.014	3.45826e-26	1.72402	8.66072e-28	3.30356	25.4611
WBGene00020648	T21D12.7	hypothetical protein(T21D12.7)	3.18273	4.89208	8.06276	3.1129	10.4752	22.8726	21.0813	9.22119	0.00877708	1.72243	0.00283203	3.29992	2.05665
WBGene00004236	ptr-22	PaTched Related family(ptr-22)	213.243	225.036	208.624	237.618	755.169	793.871	832.71	527.657	2.79003e-37	1.71837	4.17793e-39	3.29064	36.5544
WBGene00015373	C03B1.2	hypothetical protein(C03B1.2)	3.18273	9.78417	4.03138	4.15053	17.1413	21.9196	13.4153	16.3932	0.00432378	1.693	0.00124721	3.23328	2.36414
WBGene00008976	plp-2	Pur alpha Like Protein(plp-2)	8.48727	12.7194	9.0706	6.2258	27.6165	20.0136	34.4966	33.811	0.000197811	1.66086	3.87647e-05	3.16205	3.70375
WBGene00016929	C54F6.12	hypothetical protein(C54F6.12)	28.6445	30.3309	28.2197	29.0537	97.134	79.1012	89.1162	101.433	7.43284e-13	1.65643	4.45212e-14	3.15235	12.1288
WBGene00016662	C45B2.8	hypothetical protein(C45B2.8)	12.7309	13.6978	7.05491	19.715	41.9009	53.3695	46.9537	24.5899	5.74105e-05	1.65295	9.91438e-06	3.14476	4.24101
WBGene00018005	F33D11.8	hypothetical protein(F33D11.8)	20.1573	37.1798	29.2275	29.0537	93.3248	100.068	107.323	59.4255	3.97478e-09	1.63704	3.52504e-10	3.11026	8.40069
WBGene00018643	drd-50	dietary restriction down regulated(drd-50)	72.1418	76.3165	51.4001	81.973	194.268	223.961	225.186	222.333	3.27407e-23	1.61956	9.61533e-25	3.07281	22.4849
WBGene00012101	zip-10	bZIP transcription factor family(zip-10)	431.79	448.115	473.687	485.612	1402.73	1626.82	1656.8	960.029	1.0347e-31	1.61855	1.99019e-33	3.07065	30.9852
WBGene00021520	Y41D4B.18	pseudo	24.4009	16.6331	17.1334	25.9408	67.6129	68.6179	72.8262	48.1551	4.18649e-08	1.61851	4.22351e-09	3.07058	7.37815
WBGene00013923	ghi-1	Glycoprotein Hormone (FLR-2) Interacting protein(ghi-1)	99.7254	125.237	144.122	150.457	376.156	494.621	458.038	260.243	7.06897e-17	1.61307	3.0935e-18	3.05902	16.1506
WBGene00007989	fipr-22	FIP (Fungus-Induced Protein) Related(fipr-22)	73.2027	53.8129	41.3216	72.6343	186.65	159.155	183.024	206.965	5.43751e-17	1.613	2.36902e-18	3.05887	16.2646
WBGene00018706	F52F10.2	hypothetical protein(F52F10.2)	14.8527	9.78417	12.0941	12.4516	28.5688	53.3695	42.1625	25.6144	8.3988e-05	1.61116	1.50379e-05	3.05497	4.07578
WBGene00008301	pals-39	DAF-16/FOXO Controlled, germline Tumor affecting(dct-3)	120.944	117.41	136.059	116.215	358.063	455.547	407.252	272.538	1.48438e-23	1.60667	4.26352e-25	3.04549	22.8285
WBGene00018594	aman-3	Alpha-mannosidase(aman-3)	137.918	108.604	103.808	142.156	311.4	416.473	467.621	301.226	7.72012e-21	1.60562	2.61606e-22	3.04326	20.1124
WBGene00044396	ZK1290.14	hypothetical protein(ZK1290.14)	182.476	136.978	165.287	120.365	436.151	461.265	574.943	353.479	2.40392e-22	1.59452	7.40122e-24	3.01994	21.6191
WBGene00014902	Y49E10.5	pseudo	7.42636	11.741	12.0941	14.5269	37.1395	23.8257	39.2878	37.9094	7.53906e-05	1.59029	1.3384e-05	3.0111	4.12268
WBGene00014755	F40F12.8	pseudo	11.67	6.84892	9.0706	10.3763	35.2349	31.4499	36.4131	10.2458	0.00192633	1.58512	0.000498958	3.00032	2.71527
WBGene00008229	C50F4.1	hypothetical protein(C50F4.1)	786.133	756.316	775.033	803.128	2238.84	2109.05	2370.68	2627.02	8.46042e-102	1.58234	2.67579e-104	2.99456	101.073
WBGene00002095	ins-12	INSulin related(ins-12)	22.2791	13.6978	8.06276	6.2258	41.9009	39.0741	43.1208	25.6144	0.0002932	1.57997	5.9935e-05	2.98964	3.53284
WBGene00015048	faah-2	Fatty Acid Amide Hydrolase homolog(faah-2)	733.088	985.266	988.696	853.972	2321.69	3388.01	3365.34	1527.64	1.81625e-07	1.57405	1.99878e-08	2.97738	6.74082
WBGene00000755	col-182	COLlagen(col-182)	13.7918	6.84892	10.0784	24.9032	40.9486	58.1346	40.246	24.5899	0.000506189	1.56661	0.000110307	2.96208	3.29569
WBGene00021339	Y34F4.4	hypothetical protein(Y34F4.4)	13.7918	43.0503	35.2746	20.7527	76.1835	96.2557	110.197	52.2534	1.05742e-05	1.56461	1.56296e-06	2.95798	4.97575
WBGene00007833	oac-6	O-ACyltransferase homolog(oac-6)	154.893	201.554	147.145	173.285	386.631	650.917	640.104	292.004	1.88477e-06	1.54099	2.44522e-07	2.90994	5.72474
WBGene00008799	F14E5.1	hypothetical protein(F14E5.1)	11.67	10.7626	5.03922	13.4892	22.8551	27.6378	39.2878	28.6882	0.000521181	1.53511	0.000114039	2.8981	3.28301
WBGene00018997	F57B9.3	hypothetical protein(F57B9.3)	7.42636	7.82734	3.02353	7.26343	19.0459	20.9666	23.956	9.22119	0.00864937	1.52329	0.00278747	2.87446	2.06302
WBGene00009429	irg-5	hypothetical protein(F35E12.5)	598.352	424.633	370.887	517.779	1561.76	1146.49	1135.51	1616.78	1.63015e-12	1.5145	1.0143e-13	2.857	11.7878
WBGene00013900	ugt-18	UDP-glucuronosyltransferase(ugt-18)	186.72	310.158	315.455	272.897	711.364	683.32	815.461	885.235	5.02436e-26	1.51044	1.27125e-27	2.84898	25.2989
WBGene00007772	egrh-1	EGR (Early Growth factor Response factor) Homolog(egrh-1)	480.592	427.568	466.632	465.897	1212.27	1429.54	1590.68	1004.09	2.46411e-35	1.50898	3.94436e-37	2.84608	34.6083
WBGene00018268	F41C3.2	hypothetical protein(F41C3.2)	148.527	301.352	220.718	318.553	578.042	930.154	928.534	355.528	0.000670559	1.4971	0.000150706	2.82275	3.17356
WBGene00008486	ugt-44	UDP-GlucuronosylTransferase(ugt-44)	171.867	195.683	183.428	190.924	485.67	600.407	605.607	398.56	1.1734e-26	1.4946	2.87803e-28	2.81787	25.9306
WBGene00015216	valv-1	hypothetical protein(valv-1)	149.588	161.439	175.365	164.984	462.815	521.306	487.744	341.184	3.35828e-26	1.47733	8.38866e-28	2.78433	25.4739
WBGene00018813	F54D11.3	hypothetical protein(F54D11.3)	89.1163	61.6403	60.4707	100.65	209.505	201.089	201.23	248.972	8.56501e-16	1.46707	4.03567e-17	2.7646	15.0673
WBGene00015522	C06E1.7	Putative glycosyltransferase C06E1.7(C06E1.7)	2.12182	8.80575	5.03922	10.3763	14.2844	19.0605	20.123	19.467	0.00984545	1.4632	0.00323458	2.75718	2.00676
WBGene00044035	F27E5.7	hypothetical protein(F27E5.7)	14.8527	28.3741	12.0941	14.5269	48.567	57.1816	59.4108	27.6636	0.000188761	1.46247	3.67476e-05	2.7558	3.72409
WBGene00018730	F53A9.7	hypothetical protein(F53A9.7)	931.478	818.935	751.852	782.375	2133.14	2327.29	2356.31	2179.28	4.13519e-89	1.45409	1.7349e-91	2.73984	88.3835
WBGene00044997	nspd-11	pseudo	8.48727	6.84892	11.0863	14.5269	19.9982	39.0741	38.3296	14.3441	0.0042062	1.453	0.0012084	2.73777	2.37611
WBGene00016526	fbxa-8	pseudo	10.6091	8.80575	6.04707	14.5269	20.9505	38.1211	33.5384	16.3932	0.00297442	1.45254	0.000814207	2.73689	2.5266
WBGene00017703	F22E5.1	hypothetical protein(F22E5.1)	23.34	23.482	23.1804	29.0537	74.2789	62.8998	90.0745	43.0322	2.15418e-06	1.45079	2.81421e-07	2.73358	5.66672
WBGene00015178	B0416.2	hypothetical protein(B0416.2)	9.54818	10.7626	7.05491	11.414	35.2349	18.1075	26.8307	25.6144	0.00137392	1.44829	0.000339112	2.72884	2.86204
WBGene00020052	R13A5.10	hypothetical protein(R13A5.10)	14.8527	17.6115	16.1255	16.6021	47.6147	41.9332	32.5801	55.3272	2.32921e-05	1.44163	3.66077e-06	2.71627	4.63279
WBGene00022494	fbxa-91	F-box A protein(fbxa-91)	19.0964	24.4604	25.1961	16.6021	63.8037	60.0407	56.5361	51.2289	5.76307e-07	1.4378	6.83698e-08	2.70908	6.23935
WBGene00012603	nspe-6	Nematode Specific Peptide family, group E(nspe-6)	41.3754	26.4173	27.2118	34.2419	82.8496	74.3361	86.2415	105.531	7.09519e-09	1.43542	6.47557e-10	2.70461	8.14904
WBGene00008216	mec-19	hypothetical protein(mec-19)	8.48727	22.5036	16.1255	15.5645	46.6624	38.1211	45.9955	38.9339	6.14162e-05	1.4306	1.06952e-05	2.69558	4.21172
WBGene00007506	C10C5.2	hypothetical protein(C10C5.2)	83.8118	117.41	148.153	124.516	306.639	387.882	378.504	201.842	2.53915e-11	1.42751	1.7651e-12	2.68982	10.5953
WBGene00014836	T09F5.12	pseudo	122.004	119.367	130.012	126.591	338.064	391.694	353.59	252.046	1.37936e-21	1.42428	4.41594e-23	2.68381	20.8603
WBGene00021529	Y41G9A.5	hypothetical protein(Y41G9A.5)	135.796	119.367	135.051	120.365	336.16	453.641	411.085	162.908	4.98188e-05	1.41792	8.48078e-06	2.672	4.30261
WBGene00015791	C15C7.5	hypothetical protein(C15C7.5)	610.022	694.676	599.668	589.375	1587.47	1758.33	1877.19	1425.19	8.25021e-53	1.4145	8.14744e-55	2.66568	52.0835
WBGene00017510	nhr-178	Nuclear Hormone Receptor family(nhr-178)	33.9491	54.7914	44.3452	43.5806	106.657	136.283	140.861	86.0645	2.87033e-09	1.40966	2.51406e-10	2.65674	8.54207
WBGene00016765	C49C8.1	hypothetical protein(C49C8.1)	14.8527	16.6331	24.1883	14.5269	48.567	53.3695	53.6614	30.7373	5.59763e-05	1.40858	9.62866e-06	2.65476	4.252
WBGene00003768	nlp-30	QWGYGGY-amide(nlp-30)	96.5427	72.4029	78.6119	89.2364	222.837	265.894	244.351	158.809	4.00131e-14	1.40795	2.13327e-15	2.65359	13.3978
WBGene00016525	fbxa-12	F-box A protein(fbxa-12)	22.2791	35.223	24.1883	17.6398	56.1853	72.43	85.2833	48.1551	9.24864e-06	1.39684	1.35688e-06	2.63324	5.03392
WBGene00007071	AC3.5	Aminopeptidase-like protein AC3.5(AC3.5)	1117.14	906.014	1029.01	988.864	2650.23	2377.8	2669.65	2900.58	2.30847e-71	1.39134	1.41551e-73	2.62322	70.6367
WBGene00015225	B0507.8	hypothetical protein(B0507.8)	23.34	14.6763	15.1177	18.6774	51.4239	38.1211	47.9119	50.2043	1.78914e-05	1.38968	2.76692e-06	2.6202	4.74735
WBGene00006191	str-144	Seven TM Receptor(str-144)	8.48727	21.5252	17.1334	9.3387	36.1872	30.4968	43.1208	38.9339	0.000445526	1.38824	9.57594e-05	2.61759	3.35113
WBGene00007694	C23H4.6	hypothetical protein(C23H4.6)	173.989	191.77	207.616	173.285	464.719	604.219	576.86	305.324	2.94453e-14	1.38607	1.55275e-15	2.61365	13.531
WBGene00013949	ZK262.2	hypothetical protein(ZK262.2)	11.67	9.78417	11.0863	9.3387	35.2349	37.168	17.2483	19.467	0.00299935	1.38464	0.00082213	2.61108	2.52297
WBGene00007180	B0457.6	hypothetical protein(B0457.6)	90.1772	96.8633	109.855	89.2364	253.31	286.861	311.428	149.588	6.99911e-11	1.37516	5.15457e-12	2.59396	10.155
WBGene00016265	trhr-1	NMUR (NeuroMedin U Receptor) homolog(nmur-4)	46.68	73.3813	42.3295	60.1827	133.321	162.968	176.316	104.507	4.33979e-09	1.37376	3.86556e-10	2.59146	8.36253
WBGene00022258	Y73C8B.1	hypothetical protein(Y73C8B.1)	59.4109	71.4244	77.6041	84.0483	183.793	193.464	214.646	164.957	2.12426e-16	1.37164	9.51552e-18	2.58765	15.6728
WBGene00019717	trx-3	ThioRedoXin [see also xtr](trx-3)	194.146	236.777	213.663	211.677	574.233	686.179	592.192	349.381	1.87166e-15	1.36285	8.95176e-17	2.57193	14.7278
WBGene00008019	C38H2.2	Glycoprotein-N-acetylgalactosamine 3-beta-galactosyltransferase 1(C38H2.2)	563.342	570.417	551.291	505.327	1365.59	1310.41	1566.72	1388.3	9.51714e-70	1.36202	6.20429e-72	2.57045	69.0215
WBGene00007724	C25F9.4	hypothetical protein(C25F9.4)	73.2027	84.1439	77.6041	81.973	217.123	198.23	217.52	176.227	8.02211e-19	1.35223	3.07567e-20	2.55307	18.0957
WBGene00013304	Y57G11C.6	hypothetical protein(Y57G11C.6)	15.9136	28.3741	25.1961	15.5645	61.8991	63.8528	50.7867	40.9831	3.17001e-05	1.35121	5.11522e-06	2.55126	4.49894
WBGene00022649	ZK84.1	hypothetical protein(ZK84.1)	658.824	419.741	344.683	578.999	1217.98	1136.01	1484.31	1242.81	1.7335e-08	1.34392	1.65931e-09	2.5384	7.76108
WBGene00007439	C08E8.3	hypothetical protein(C08E8.3)	92.299	85.1223	59.4629	87.1612	212.362	190.605	179.191	239.751	9.58789e-15	1.34309	4.82705e-16	2.53694	14.0183
WBGene00008644	F10C2.3	hypothetical protein(F10C2.3)	146.405	162.417	151.177	199.225	393.297	466.983	506.908	302.25	5.08742e-16	1.34131	2.35112e-17	2.53381	15.2935
WBGene00004144	pqn-60	Prion-like-(Q/N-rich)-domain-bearing protein(pqn-60)	38.1927	61.6403	52.4079	37.3548	144.749	124.846	122.655	86.0645	2.87971e-08	1.33296	2.83826e-09	2.51918	7.54065
WBGene00007947	C35A5.3	hypothetical protein(C35A5.3)	39.2536	41.0935	39.306	41.5053	108.562	85.7724	75.7009	136.269	6.72227e-08	1.33203	6.99866e-09	2.51756	7.17248
WBGene00016670	ilys-3	Invertebrate LYSozyme(ilys-3)	483.774	327.77	361.816	459.671	1197.99	933.966	928.534	1009.21	1.16023e-25	1.31854	2.98052e-27	2.49413	24.9355
WBGene00021517	Y41D4B.15	hypothetical protein(Y41D4B.15)	35.01	25.4388	24.1883	21.7903	61.8991	81.0073	81.4503	39.9585	3.51669e-05	1.31633	5.75635e-06	2.49033	4.45387
WBGene00016229	C29G2.2	pseudo	56.2281	36.2014	43.3373	51.8816	117.132	121.034	112.114	114.753	5.50735e-11	1.31326	3.99196e-12	2.48503	10.2591
WBGene00018350	ifo-1	Intermediate Filament Organize(ifo-1)	1119.26	935.367	1047.15	1038.67	2292.17	2696.11	2782.73	2491.77	1.17447e-65	1.31005	8.41453e-68	2.47949	64.9302
WBGene00044488	Y54G2A.45	hypothetical protein(Y54G2A.45)	145.344	149.698	156.216	175.36	371.395	338.324	418.75	424.175	6.51296e-27	1.30866	1.57643e-28	2.47711	26.1862
WBGene00044534	H23N18.6	hypothetical protein(H23N18.6)	6.36545	13.6978	7.05491	8.30106	25.7119	22.8726	24.9142	14.3441	0.00861753	1.30691	0.0027758	2.47411	2.06462
WBGene00009488	oac-20	O-ACyltransferase homolog(oac-20)	46.68	38.1583	41.3216	46.6935	114.275	113.41	103.49	92.2119	3.07289e-10	1.29548	2.39992e-11	2.45458	9.51245
WBGene00020455	fbxa-59	F-box A protein(fbxa-59)	67.8981	100.777	93.7296	58.1074	204.743	194.417	205.063	183.399	4.34759e-13	1.29409	2.548e-14	2.45222	12.3618
WBGene00013493	clec-9	C-type LECtin(clec-9)	16.9745	25.4388	29.2275	20.7527	59.9945	69.5709	65.1602	31.7619	0.000157383	1.29308	2.99264e-05	2.45051	3.80304
WBGene00003460	msp-71	pseudo	9.54818	23.482	7.05491	10.3763	39.9963	28.5908	26.8307	28.6882	0.00456406	1.29195	0.00133185	2.44859	2.34065
WBGene00015362	fbxa-105	F-box A protein(fbxa-105)	85.9336	140.892	106.832	121.403	240.93	317.358	355.507	191.596	8.89914e-10	1.27976	7.31782e-11	2.42799	9.05065
WBGene00045048	D1007.19	hypothetical protein(D1007.19)	36.0709	25.4388	19.1491	20.7527	66.6606	58.1346	68.035	52.2534	1.18815e-05	1.27702	1.77048e-06	2.42338	4.92513
WBGene00017933	F29G9.7	hypothetical protein(F29G9.7)	47.7409	46.964	49.3844	68.4838	116.18	113.41	138.945	145.49	3.00147e-10	1.27405	2.3422e-11	2.4184	9.52267
WBGene00015716	sox-4	SOX (mammalian SRY box) family(sox-4)	90.1772	99.7985	92.7217	77.8225	209.505	231.585	240.518	189.547	4.28169e-17	1.27247	1.8544e-18	2.41575	16.3684
WBGene00014137	clec-187	C-type LECtin(clec-187)	175.05	143.827	142.106	164.984	367.585	388.835	344.966	398.56	1.53325e-27	1.26205	3.57259e-29	2.39836	26.8144
WBGene00013659	Y105C5B.20	hypothetical protein(Y105C5B.20)	46.68	40.1151	32.251	66.4085	102.848	115.316	113.072	112.703	3.37763e-08	1.26186	3.36857e-09	2.39805	7.47139
WBGene00021352	Y37E3.11	hypothetical protein(Y37E3.11)	1479.97	1271.94	1389.82	1423.63	3120.67	3078.28	3405.58	3713.07	8.98888e-67	1.25893	6.26605e-69	2.39317	66.0463
WBGene00004124	pqn-37	Prion-like-(Q/N-rich)-domain-bearing protein(pqn-37)	71.0809	84.1439	86.6747	77.8225	190.459	196.323	229.019	148.564	7.19857e-13	1.25745	4.30715e-14	2.39074	12.1428
WBGene00020580	T19D12.5	hypothetical protein(T19D12.5)	27.5836	58.705	53.4158	46.6935	117.132	123.893	125.529	78.8924	1.06188e-06	1.25453	1.31801e-07	2.3859	5.97392
WBGene00015227	B0507.10	hypothetical protein(B0507.10)	101.847	62.6187	61.4785	91.3117	176.174	188.699	183.982	205.94	6.64173e-12	1.25355	4.35552e-13	2.38427	11.1777
WBGene00017905	F28F5.6	hypothetical protein(F28F5.6)	96.5427	79.2518	90.706	94.4246	184.745	270.66	261.599	141.392	3.90967e-09	1.25189	3.46477e-10	2.38153	8.40786
WBGene00003769	nlp-31	QWGYGGY-amide(nlp-31)	427.546	340.489	337.628	352.795	877.063	1026.41	897.87	665.975	1.16057e-22	1.25052	3.51324e-24	2.37927	21.9353
WBGene00000176	aqp-8	AQuaPorin or aquaglyceroporin related(aqp-8)	1155.33	671.194	802.245	898.59	2196.94	1844.11	2030.51	2315.54	6.79189e-11	1.24985	4.99758e-12	2.37817	10.168
WBGene00018647	F49F1.7	hypothetical protein(F49F1.7)	153.832	95.8849	102.8	157.72	288.545	286.861	309.511	324.791	2.36721e-14	1.2479	1.23762e-15	2.37495	13.6258
WBGene00002199	kin-15	Receptor-like tyrosine-protein kinase kin-15(kin-15)	42.4363	18.5899	19.1491	23.8656	53.3285	49.5574	60.3691	81.9662	0.000238166	1.24053	4.77009e-05	2.36285	3.62312
WBGene00175027	W02F12.8	hypothetical protein(W02F12.8)	19.0964	14.6763	11.0863	18.6774	43.8055	40.0271	32.5801	32.7865	0.000602752	1.23614	0.000133755	2.35568	3.21986
WBGene00195179	F48C1.11	hypothetical protein(F48C1.11)	6.36545	10.7626	9.0706	12.4516	24.7596	24.7787	22.9977	18.4424	0.00728315	1.23422	0.00228982	2.35254	2.13768
WBGene00020248	T05C1.1	hypothetical protein(T05C1.1)	21.2182	33.2662	24.1883	35.2795	53.3285	100.068	87.1997	26.639	0.00249494	1.23055	0.000664921	2.34657	2.60294
WBGene00009798	F46G10.4	hypothetical protein(F46G10.4)	177.172	175.137	157.224	158.758	335.207	404.083	447.498	376.02	1.94184e-23	1.22577	5.62761e-25	2.3388	22.7118
WBGene00016912	clec-86	C-type LECtin(clec-86)	40.3145	32.2878	40.3138	31.129	94.2771	99.1148	67.0767	74.7941	7.84213e-07	1.22059	9.48567e-08	2.33042	6.10557
WBGene00016542	C39H7.4	hypothetical protein(C39H7.4)	376.623	312.115	347.707	345.532	815.164	734.783	878.705	787.9	3.96334e-42	1.21982	5.29537e-44	2.32917	41.4019
WBGene00206524	C54E10.11	hypothetical protein(C54E10.11)	7.42636	12.7194	8.06276	12.4516	22.8551	27.6378	28.7472	15.3687	0.00969176	1.21829	0.00317595	2.3267	2.0136
WBGene00009842	igeg-2	IG (immunoglobulin), EGF and transmmembrane domain(igeg-2)	59.4109	60.6619	53.4158	53.9569	126.655	147.719	145.652	106.556	2.56875e-10	1.21229	1.98961e-11	2.31705	9.59028
WBGene00007440	C08E8.4	hypothetical protein(C08E8.4)	49.8627	93.928	72.5648	78.8601	141.892	192.511	225.186	124.998	3.8672e-07	1.21211	4.4755e-08	2.31676	6.4126
WBGene00000022	abt-4	ABC Transporter family(abt-4)	1674.11	1535.14	1573.25	1606.26	3140.67	3718.71	4359.99	3482.54	2.42696e-43	1.20256	3.10165e-45	2.30147	42.6149
WBGene00010887	M7.12	hypothetical protein(M7.12)	146.405	142.849	122.957	141.118	284.736	334.512	325.801	325.816	3.95809e-23	1.19985	1.16497e-24	2.29715	22.4025
WBGene00021128	W10C8.5	hypothetical protein(W10C8.5)	474.226	510.734	481.75	540.607	1212.27	1060.72	1084.73	1248.96	4.1876e-49	1.19801	4.81116e-51	2.29424	48.378
WBGene00001784	gst-36	Probable glutathione S-transferase gst-36(gst-36)	251.435	233.842	244.906	224.129	547.569	484.137	551.946	599.378	1.11538e-32	1.19345	2.03018e-34	2.28698	31.9526
WBGene00003610	nhr-11	Nuclear Hormone Receptor family(nhr-11)	41.3754	34.2446	25.1961	53.9569	76.1835	92.4436	102.532	81.9662	4.26707e-06	1.1932	5.86093e-07	2.28659	5.36987
WBGene00021298	Y27F2A.6	hypothetical protein(Y27F2A.6)	14.8527	14.6763	15.1177	15.5645	44.7578	36.215	28.7472	27.6636	0.00143708	1.19209	0.000357114	2.28484	2.84252
WBGene00015217	tes-1	TEStin (human testis-derived transcript) homolog(tes-1)	372.379	350.273	382.981	375.623	814.211	945.402	1008.07	607.574	1.15538e-18	1.18884	4.47446e-20	2.27969	17.9373
WBGene00018696	pho-6	intestinal acid PHOsphatase(pho-6)	71.0809	92.9496	131.02	84.0483	212.362	246.834	245.309	158.809	1.16419e-08	1.18669	1.09333e-09	2.27629	7.93398
WBGene00016997	cebp-1	C/EBP (CCAAT/enhancer-binding protein) homolog(cebp-1)	564.403	582.158	599.668	616.354	1282.74	1557.25	1587.8	936.463	1.81407e-18	1.18334	7.10736e-20	2.27102	17.7413
WBGene00008916	clec-221	C-type LECtin(clec-221)	8.48727	18.5899	10.0784	15.5645	26.6642	39.0741	35.4548	18.4424	0.00825892	1.18062	0.00264138	2.26674	2.08308
WBGene00016230	C29G2.2	pseudo	21.2182	18.5899	18.1412	16.6021	42.8532	44.7922	33.5384	47.1305	0.000331138	1.17471	6.88652e-05	2.25747	3.47999
WBGene00015859	C16D9.4	hypothetical protein(C16D9.4)	366.013	320.921	309.408	393.263	675.176	966.369	1021.48	472.33	5.14261e-05	1.17428	8.77627e-06	2.2568	4.28882
WBGene00014138	clec-186	C-type LECtin(clec-186)	750.062	651.626	683.319	654.746	1418.92	1568.68	1554.26	1560.43	4.3898e-63	1.15576	3.37176e-65	2.22802	62.3576
WBGene00009318	F32B4.8	hypothetical protein(F32B4.8)	15.9136	9.78417	12.0941	16.6021	37.1395	20.9666	29.7054	32.7865	0.00497212	1.15233	0.00146984	2.22272	2.30346
WBGene00004859	sma-5	Mitogen-activated protein kinase sma-5(sma-5)	556.977	569.439	474.695	495.988	1108.47	1198.91	1279.25	1063.51	5.74483e-40	1.14907	8.15764e-42	2.2177	39.2407
WBGene00008226	C50B8.4	hypothetical protein(C50B8.4)	82.7509	95.8849	99.7766	75.7472	191.411	223.008	240.518	129.097	2.9221e-08	1.14676	2.8857e-09	2.21416	7.53431
WBGene00016659	C45B2.2	hypothetical protein(C45B2.2)	106.091	128.173	80.6276	109.989	237.121	269.707	263.516	165.981	2.47641e-09	1.14052	2.15305e-10	2.20461	8.60618
WBGene00008091	C44F1.1	hypothetical protein(C44F1.1)	73.2027	79.2518	84.659	67.4461	159.033	197.276	189.731	123.974	2.83869e-09	1.13796	2.48268e-10	2.2007	8.54688
WBGene00022760	ZK546.3	pseudo	15.9136	28.3741	23.1804	14.5269	51.4239	48.6044	47.9119	32.7865	0.00100882	1.13689	0.000239297	2.19907	2.99618
WBGene00235271	C49C8.8	hypothetical protein(C49C8.8)	37.1318	42.0719	49.3844	28.0161	77.1358	80.0542	105.406	81.9662	4.2034e-06	1.1357	5.76533e-07	2.19724	5.3764
WBGene00003879	ora-1	Onchocerca Related Antigen family(ora-1)	32.8882	45.9856	36.2824	46.6935	68.5652	113.41	129.362	44.0568	0.000902899	1.13554	0.000210674	2.197	3.04436
WBGene00206354	F27E5.9	hypothetical protein(F27E5.9)	99.7254	109.583	96.7531	93.387	215.218	276.378	246.267	137.293	3.80461e-08	1.13238	3.82352e-09	2.1922	7.41969
WBGene00002274	lec-11	Galectin(lec-11)	238.704	271.022	257	223.091	474.242	673.79	648.728	367.823	4.68002e-11	1.12903	3.35603e-12	2.18712	10.3298
WBGene00004020	pho-1	Intestinal acid phosphatase(pho-1)	158.075	116.432	89.6982	138.005	219.98	237.304	275.973	363.725	1.9721e-08	1.12769	1.89917e-09	2.18509	7.70507
WBGene00012295	nmat-1	Nicotinamide-nucleotide adenylyltransferase(nmat-1)	33.9491	34.2446	31.2432	38.3924	59.9945	84.8194	98.6986	55.3272	5.64184e-05	1.11842	9.71927e-06	2.17108	4.24858
WBGene00020725	cnp-3	CalciNeurin binding Protein(cnp-3)	500.749	605.64	684.327	614.279	1158.94	1567.73	1602.18	890.358	2.19947e-06	1.11782	2.87905e-07	2.17018	5.65768
WBGene00018345	F42C5.3	hypothetical protein(F42C5.3)	15.9136	13.6978	12.0941	13.4892	32.378	28.5908	23.956	34.8356	0.00406922	1.11766	0.0011638	2.16995	2.39049
WBGene00021451	mltn-8	MLt-TeN (mlt-10) related(mltn-8)	23.34	18.5899	26.204	20.7527	50.4716	48.6044	45.9955	47.1305	0.000181739	1.11391	3.51209e-05	2.16431	3.74055
WBGene00003653	nhr-63	Nuclear Hormone Receptor family(nhr-63)	38.1927	38.1583	42.3295	32.1666	74.2789	112.457	92.9492	46.106	0.000225258	1.11245	4.47812e-05	2.16212	3.64732
WBGene00009846	F48F5.2	pseudo	16.9745	25.4388	18.1412	19.715	47.6147	42.8862	60.3691	22.5407	0.00391255	1.11162	0.00111041	2.16089	2.40754
WBGene00007414	C07E3.3	hypothetical protein(C07E3.3)	1035.45	1014.62	1063.28	1083.29	2102.66	2574.12	2801.89	1585.02	8.81924e-09	1.11099	8.15152e-10	2.15993	8.05457
WBGene00007726	C25F9.6	hypothetical protein(C25F9.6)	40.3145	42.0719	25.1961	30.0914	78.0881	56.2286	80.4921	81.9662	3.55904e-05	1.1071	5.83258e-06	2.15413	4.44867
WBGene00016218	pals-23	hypothetical protein(C29F9.3)	148.527	178.072	147.145	162.908	320.923	331.653	362.214	356.553	1.34122e-21	1.10563	4.28519e-23	2.15193	20.8725
WBGene00001577	gem-4	Gon-2 Extragenic Modifier(gem-4)	319.333	415.827	423.295	336.193	779.929	987.336	955.364	481.551	6.57654e-05	1.10014	1.1529e-05	2.14375	4.182
WBGene00019546	glct-6	GLuCuronosylTransferase-like(glct-6)	523.028	384.518	474.695	424.392	1049.43	800.542	931.408	1075.81	2.9975e-21	1.09468	9.78981e-23	2.13565	20.5232
WBGene00018823	F54E2.1	hypothetical protein(F54E2.1)	796.742	950.043	892.951	893.402	1796.98	1985.15	2123.46	1621.91	1.65382e-34	1.09109	2.72203e-36	2.13035	33.7815
WBGene00015259	dod-20	Downstream Of DAF-16 (regulated by DAF-16)(dod-20)	13.7918	14.6763	14.1098	10.3763	26.6642	28.5908	29.7054	27.6636	0.00560786	1.08732	0.00168979	2.12479	2.2512
WBGene00002067	ifp-1	Intermediate filament protein ifp-1(ifp-1)	206.877	151.655	150.169	195.075	365.681	385.976	356.465	384.216	3.90618e-18	1.08644	1.58335e-19	2.1235	17.4082
WBGene00000558	cnc-4	CaeNaCin (Caenorhabditis bacteriocin)(cnc-4)	331.003	484.316	445.467	351.758	870.397	987.336	946.74	617.82	1.23682e-12	1.08522	7.57598e-14	2.1217	11.9077
WBGene00006467	magu-2	MAGUK family(magu-2)	224.913	231.885	215.679	230.354	433.294	589.923	532.781	355.528	2.77217e-13	1.08291	1.60501e-14	2.1183	12.5572
WBGene00007913	cyp-36A1	Probable cytochrome P450 CYP36A1(cyp-36A1)	97.6036	119.367	103.808	122.441	219.98	223.008	215.604	279.71	5.74365e-13	1.08002	3.39955e-14	2.11407	12.2408
WBGene00016340	gba-2	Putative glucosylceramidase 2(gba-2)	22.2791	20.5468	24.1883	17.6398	38.0918	46.6983	51.7449	42.0077	0.000619944	1.07678	0.00013797	2.10933	3.20765
WBGene00010977	R02D5.3	hypothetical protein(R02D5.3)	204.755	208.403	211.647	202.338	443.769	547.037	432.166	319.668	4.49822e-13	1.07583	2.63918e-14	2.10793	12.347
WBGene00004013	pha-4	Defective pharyngeal development protein 4(pha-4)	270.532	239.712	234.828	250.07	509.477	623.279	665.976	298.152	0.000137695	1.07574	2.57828e-05	2.1078	3.86108
WBGene00011957	T23F11.6	hypothetical protein(T23F11.6)	54.1063	68.4892	32.251	39.43	82.8496	143.907	115.947	66.5975	0.000554191	1.07518	0.00012212	2.10699	3.25634
WBGene00007553	C13G3.1	hypothetical protein(C13G3.1)	208.999	207.424	200.561	228.279	426.628	487.95	532.781	323.766	4.65665e-13	1.06823	2.73815e-14	2.09685	12.3319
WBGene00002106	ins-23	Probable insulin-like peptide alpha-type 3(ins-23)	13.7918	31.3093	42.3295	24.9032	64.756	58.1346	53.6614	58.4009	0.00111052	1.05995	0.000266717	2.08486	2.95447
WBGene00015167	B0403.3	hypothetical protein(B0403.3)	80.629	69.4676	84.659	83.0106	156.176	171.545	178.232	154.711	2.91502e-11	1.0575	2.04708e-12	2.08132	10.5354
WBGene00017413	F13A2.4	hypothetical protein(F13A2.4)	26.5227	23.482	34.2667	38.3924	63.8037	66.7119	51.7449	72.745	0.000130095	1.0561	2.42002e-05	2.0793	3.88574
WBGene00009649	F43C1.5	hypothetical protein(F43C1.5)	35.01	51.8561	34.2667	29.0537	65.7083	105.786	90.0745	50.2043	0.000677569	1.05287	0.000152413	2.07466	3.16905
WBGene00021494	Y40B10B.1	hypothetical protein(Y40B10B.1)	27.5836	28.3741	19.1491	31.129	46.6624	65.7588	57.4943	50.2043	0.000326639	1.05259	6.78452e-05	2.07425	3.48593
WBGene00019101	F59B1.10	hypothetical protein(F59B1.10)	22.2791	17.6115	17.1334	20.7527	30.4734	47.6513	52.7031	29.7127	0.00380928	1.04933	0.00107814	2.06957	2.41916
WBGene00006372	syx-2	Putative syntaxin-2(syx-2)	284.323	307.223	339.644	320.629	600.897	791.965	805.879	381.143	0.000145494	1.04348	2.74498e-05	2.06119	3.83715
WBGene00007404	best-5	Bestrophin homolog 5(best-5)	91.2381	84.1439	110.863	89.2364	176.174	186.793	191.648	219.26	2.14425e-11	1.0424	1.47259e-12	2.05966	10.6687
WBGene00015046	nlp-34	Neuropeptide-Like Protein(nlp-34)	720.357	800.345	727.664	730.493	1516.05	1789.78	1556.18	1247.93	9.73415e-26	1.03652	2.48804e-27	2.05128	25.0117
WBGene00000281	cah-3	Putative carbonic anhydrase 3(cah-3)	1285.82	1083.11	1097.54	1105.08	2361.69	1984.2	2248.99	2744.84	2.26511e-27	1.03072	5.32177e-29	2.04305	26.6449
WBGene00019782	M60.7	hypothetical protein(M60.7)	344.795	240.691	281.189	319.591	490.431	716.676	656.394	554.296	2.65157e-13	1.02857	1.53176e-14	2.04	12.5765
WBGene00019373	K04A8.1	hypothetical protein(K04A8.1)	257.801	278.849	266.071	262.521	514.239	557.521	620.939	479.502	7.60015e-23	1.02811	2.26145e-24	2.03934	22.1192
WBGene00022419	Y102A11A.9	hypothetical protein(Y102A11A.9)	49.8627	48.9208	63.4942	44.6182	83.8019	134.377	108.281	94.2611	8.78629e-06	1.02397	1.28338e-06	2.03351	5.05619
WBGene00020898	T28D9.9	hypothetical protein(T28D9.9)	29.7054	38.1583	44.3452	34.2419	70.4698	84.8194	67.0767	74.7941	3.0589e-05	1.01849	4.92804e-06	2.0258	4.51444
WBGene00013119	Y51H4A.25	hypothetical protein(Y51H4A.25)	398.902	433.439	408.177	400.526	763.74	872.972	963.03	716.179	2.07583e-23	1.0149	6.04272e-25	2.02076	22.6828
WBGene00017449	otpl-3	OToPetrin-Like(otpl-3)	239.765	223.079	197.538	227.242	419.009	460.312	474.328	437.494	3.10656e-23	1.01372	9.10332e-25	2.01911	22.5077
WBGene00020247	T05B11.4	hypothetical protein(T05B11.4)	59.4109	58.705	43.3373	52.9193	97.134	125.8	116.905	92.2119	1.65473e-06	1.01252	2.12328e-07	2.01743	5.78127
WBGene00018865	F55A12.6	hypothetical protein(F55A12.6)	54.1063	58.705	82.6433	74.7096	147.606	158.202	158.109	79.917	6.10527e-05	1.01062	1.06238e-05	2.01478	4.2143
WBGene00004231	ptr-17	PaTched Related family(ptr-17)	19.0964	15.6547	28.2197	25.9408	40.9486	59.0876	49.8284	28.6882	0.00540514	1.00916	0.00161774	2.01274	2.26719
WBGene00007517	gpx-3	Glutathione peroxidase 3(gpx-3)	50.9236	36.2014	71.557	58.1074	125.703	124.846	94.8657	90.1628	3.50608e-05	1.00878	5.73673e-06	2.01221	4.45518
WBGene00045253	F46C3.6	hypothetical protein(F46C3.6)	144.284	120.345	110.863	156.683	259.976	291.626	295.138	221.309	5.62148e-11	1.0074	4.08921e-12	2.01028	10.2501
WBGene00012824	Y43F8B.14	hypothetical protein(Y43F8B.14)	28.6445	36.2014	31.2432	18.6774	47.6147	61.9467	68.9932	52.2534	0.000752604	1.00563	0.000171914	2.00782	3.12343
WBGene00013559	Y75B8A.28	hypothetical protein(Y75B8A.28)	251.435	256.345	238.859	352.795	499.954	638.528	665.018	399.585	3.81974e-09	1.00358	3.38014e-10	2.00497	8.41797
WBGene00016728	C46H11.2	Flavin-containing monooxygenase(C46H11.2)	180.354	144.806	131.02	168.097	331.398	281.143	280.764	357.577	1.39908e-12	1.00351	8.63307e-14	2.00488	11.8542
WBGene00014159	arrd-4	ARRestin Domain protein(arrd-4)	42.4363	45.0072	60.4707	36.3171	25.7119	25.7317	20.123	20.4915	0.00182269	-1.00052	0.00046964	0.499821	2.73929
WBGene00015569	C07D10.5	hypothetical protein(C07D10.5)	434.972	528.345	525.087	450.333	212.362	233.492	291.305	231.554	1.40743e-16	-1.0014	6.2409e-18	0.499514	15.8516
WBGene00009805	F47B8.4	hypothetical protein(F47B8.4)	109.274	124.259	138.075	114.14	57.1376	62.8998	65.1602	57.3763	6.07188e-08	-1.00209	6.29801e-09	0.499275	7.21668
WBGene00012135	T28F3.9	hypothetical protein(T28F3.9)	29.7054	26.4173	33.2589	29.0537	15.2367	19.0605	14.3736	10.2458	0.00995507	-1.00287	0.00327252	0.499007	2.00196
WBGene00009500	F36H2.3	hypothetical protein(F36H2.3)	199.451	187.856	177.381	224.129	105.705	88.6315	97.7404	101.433	1.88004e-11	-1.00299	1.28143e-12	0.498966	10.7258
WBGene00000455	ceh-34	Homeobox protein ceh-34(ceh-34)	59.4109	53.8129	64.5021	44.6182	35.2349	21.9196	21.0813	32.7865	0.000826406	-1.00397	0.000190853	0.498626	3.08281
WBGene00007695	C23H4.7	Carboxylic ester hydrolase(C23H4.7)	165.502	181.007	217.695	171.209	84.7542	96.2557	100.615	85.0399	3.43285e-10	-1.00406	2.68769e-11	0.498596	9.46435
WBGene00022047	Y66H1A.5	hypothetical protein(Y66H1A.5)	1258.24	1318.91	1335.39	1309.49	657.083	626.138	621.897	699.786	2.26342e-54	-1.00421	2.17679e-56	0.498544	53.6452
WBGene00016756	C49A9.2	hypothetical protein(C49A9.2)	480.592	445.18	415.232	489.763	219.98	227.773	206.98	258.193	5.55167e-21	-1.00464	1.86334e-22	0.498393	20.2556
WBGene00019593	K09F6.10	hypothetical protein(K09F6.10)	292.811	264.173	332.589	285.349	122.846	162.015	159.068	141.392	8.13167e-14	-1.00484	4.45607e-15	0.498326	13.0898
WBGene00011383	T02E9.5	hypothetical protein(T02E9.5)	324.638	342.446	410.193	299.876	164.747	170.592	182.065	169.055	2.74211e-15	-1.00489	1.32743e-16	0.498307	14.5619
WBGene00018153	F37C12.10	hypothetical protein(F37C12.10)	79.5681	88.0575	58.455	86.1235	42.8532	32.4029	37.3713	43.0322	4.92042e-05	-1.00528	8.36213e-06	0.498174	4.308
WBGene00008356	nspc-20	Nematode Specific Peptide family, group C(nspc-20)	280.08	329.727	317.471	213.752	118.084	195.37	128.404	126.023	1.1655e-07	-1.00658	1.24577e-08	0.497723	6.93349
WBGene00007810	C29F7.1	hypothetical protein(C29F7.1)	141.101	144.806	126.988	142.156	61.8991	71.477	61.3273	81.9662	9.06477e-09	-1.00666	8.40772e-10	0.497698	8.04264
WBGene00015544	C06E8.5	hypothetical protein(C06E8.5)	82.7509	82.187	52.4079	45.6558	36.1872	37.168	31.6219	25.6144	0.000858183	-1.00807	0.000199022	0.497211	3.06642
WBGene00004145	pqn-62	Prion-like-(Q/N-rich)-domain-bearing protein(pqn-62)	321.455	378.647	425.311	364.209	180.936	211.572	184.94	162.908	1.34248e-15	-1.00821	6.38614e-17	0.497162	14.8721
WBGene00006870	vab-3	hypothetical protein(vab-3)	46.68	49.8993	74.5805	54.9945	37.1395	30.4968	20.123	24.5899	0.00114273	-1.00831	0.000275904	0.49713	2.94206
WBGene00045473	F30A10.14	hypothetical protein(F30A10.14)	126.248	123.281	138.075	158.758	83.8019	74.3361	52.7031	60.45	3.15064e-07	-1.00832	3.59539e-08	0.497124	6.5016
WBGene00044500	T19E7.6	hypothetical protein(T19E7.6)	481.652	568.46	535.166	470.048	247.596	291.626	243.393	237.702	3.69913e-21	-1.01039	1.21291e-22	0.496412	20.4319
WBGene00020881	T28A11.19	hypothetical protein(T28A11.19)	32.8882	44.0288	38.2981	29.0537	19.0459	24.7787	15.3318	12.2949	0.00645376	-1.01167	0.00198824	0.495972	2.19019
WBGene00014053	ZK669.3	GILT-like protein ZK669.3(ZK669.3)	332.064	307.223	316.463	288.462	135.226	157.249	153.318	171.104	2.76021e-17	-1.01323	1.16888e-18	0.495436	16.5591
WBGene00021412	cyp-29A3	CYtochrome P450 family(cyp-29A3)	148.527	152.633	121.949	115.177	67.6129	61.9467	80.4921	56.3517	1.54138e-07	-1.01351	1.6754e-08	0.49534	6.81209
WBGene00044191	F43D2.6	hypothetical protein(F43D2.6)	291.75	344.403	295.299	283.274	151.415	163.921	127.446	158.809	2.99729e-15	-1.01498	1.4587e-16	0.494834	14.5233
WBGene00000753	col-180	COLlagen(col-180)	102.908	92.9496	61.4785	87.1612	47.6147	33.3559	61.3273	27.6636	0.00049011	-1.01606	0.000106513	0.494466	3.30971
WBGene00007565	clec-48	C-type LECtin(clec-48)	6080.07	4714.01	4986.82	5254.57	2475.01	2550.3	2565.21	2801.19	4.24305e-40	-1.01739	5.97035e-42	0.494011	39.3723
WBGene00020516	T15B7.1	hypothetical protein(T15B7.1)	1329.32	1177.04	1146.93	1374.86	590.422	571.816	642.978	678.27	6.43891e-33	-1.01787	1.15121e-34	0.493845	32.1912
WBGene00006886	vap-1	Venom-Allergen-like Protein(vap-1)	88.0554	97.8417	131.02	93.387	60.9468	43.8392	52.7031	45.0814	6.09909e-06	-1.01792	8.63707e-07	0.493829	5.21473
WBGene00004359	rhr-2	RH (Rhesus) antigen Related(rhr-2)	71.0809	98.8201	78.6119	92.3493	51.4239	53.3695	34.4966	28.6882	9.60568e-05	-1.0185	1.74344e-05	0.493628	4.01747
WBGene00017962	fbxa-72	F-box A protein(fbxa-72)	161.258	167.309	190.483	155.645	83.8019	89.5845	77.6174	81.9662	8.18333e-11	-1.01909	6.06897e-12	0.493426	10.0871
WBGene00016535	C39D10.8	hypothetical protein(C39D10.8)	148.527	153.611	158.232	171.209	86.6587	61.9467	79.5338	82.9907	9.17142e-10	-1.02225	7.5654e-11	0.492348	9.03756
WBGene00013439	Y66D12A.13	hypothetical protein(Y66D12A.13)	314.029	369.842	403.138	363.171	170.461	197.276	183.024	162.908	1.76805e-17	-1.02271	7.41773e-19	0.492191	16.7525
WBGene00017153	E_BE45912.2	hypothetical protein(E_BE45912.2)	285.384	491.165	434.381	322.704	159.033	231.585	197.397	167.006	2.60044e-08	-1.02278	2.54287e-09	0.492167	7.58495
WBGene00019148	H03E18.1	hypothetical protein(H03E18.1)	113.517	140.892	75.5884	120.365	39.9963	91.4905	47.9119	42.0077	0.000729567	-1.0231	0.000165663	0.492057	3.13693
WBGene00021157	Y4C6B.3	hypothetical protein(Y4C6B.3)	241.887	180.029	179.396	219.978	101.895	123.893	105.406	71.7204	3.04057e-08	-1.02408	3.01251e-09	0.491725	7.51704
WBGene00000754	col-181	COLlagen(col-181)	19870.8	19127.1	19583.4	18813.3	9948.61	9830.47	9053.44	9172.01	2.39214e-115	-1.026	5.09524e-118	0.49107	114.621
WBGene00012750	faah-6	Fatty Acid Amide Hydrolase homolog(faah-6)	48.8018	45.0072	62.4864	51.8816	24.7596	25.7317	20.123	31.7619	0.000509588	-1.02676	0.00011114	0.490813	3.29278
WBGene00015728	C13A10.1	hypothetical protein(C13A10.1)	271.593	222.101	273.126	266.672	125.703	125.8	128.404	127.048	2.71336e-15	-1.02679	1.31176e-16	0.4908	14.5665
WBGene00010342	F59F5.3	hypothetical protein(F59F5.3)	113.517	105.669	107.839	112.064	43.8055	53.3695	45.0372	73.7696	1.38841e-06	-1.0273	1.75287e-07	0.490627	5.85748
WBGene00001105	dsl-3	Delta-like protein(dsl-3)	47.7409	53.8129	74.5805	41.5053	31.4257	23.8257	25.8725	25.6144	0.000812915	-1.02871	0.000187422	0.490148	3.08996
WBGene00012445	Y16B4A.2	Carboxypeptidase(Y16B4A.2)	2624.69	1875.63	1963.28	2186.29	945.628	845.335	891.162	1557.36	7.35726e-05	-1.02895	1.30211e-05	0.490066	4.13328
WBGene00022515	ttr-48	TransThyretin-Related family domain(ttr-48)	876.31	937.323	861.707	948.396	409.486	515.587	429.291	420.077	7.89545e-32	-1.02978	1.49827e-33	0.489785	31.1026
WBGene00018340	anmt-2	Amine N-MethylTransferase(anmt-2)	279.019	301.352	294.291	288.462	143.796	151.531	162.901	110.654	8.38297e-15	-1.0299	4.19338e-16	0.489743	14.0766
WBGene00017338	F10D7.1	hypothetical protein(F10D7.1)	129.431	131.108	91.7139	109.989	54.2808	60.9937	51.7449	59.4255	3.63986e-07	-1.02991	4.19125e-08	0.48974	6.43892
WBGene00022614	ZC449.4	hypothetical protein(ZC449.4)	56.2281	71.4244	53.4158	50.844	20.9505	33.3559	29.7054	29.7127	0.000290166	-1.03006	5.9258e-05	0.489691	3.53735
WBGene00006310	sul-3	SULfatase domain protein(sul-3)	58.35	48.9208	51.4001	61.2203	24.7596	34.309	27.7889	20.4915	0.000327616	-1.0303	6.81115e-05	0.489607	3.48463
WBGene00004114	pqn-25	Prion-like-(Q/N-rich) domain-bearing protein 25(pqn-25)	42.4363	51.8561	74.5805	52.9193	22.8551	24.7787	37.3713	23.5653	0.00106889	-1.03059	0.000255478	0.48951	2.97107
WBGene00017772	clec-1	C-type LECtin(clec-1)	4083.44	4709.12	4602.83	4016.68	2249.32	2116.67	2065.96	2091.16	6.48769e-58	-1.03075	5.61125e-60	0.489457	57.1879
WBGene00010472	cdr-7	CaDmium Responsive(cdr-7)	237.643	222.101	216.687	231.392	112.371	118.175	92.9492	120.9	6.20257e-14	-1.03109	3.37492e-15	0.48934	13.2074
WBGene00015802	kynu-1	Kynureninase(kynu-1)	589.865	581.18	631.919	535.419	270.451	277.331	252.017	344.258	1.7194e-21	-1.03301	5.53787e-23	0.48869	20.7646
WBGene00001243	elo-5	Elongation of very long chain fatty acids protein(elo-5)	786.133	748.489	660.138	666.16	341.874	279.237	305.678	472.33	3.91679e-13	-1.03328	2.29046e-14	0.488598	12.4071
WBGene00016594	C42D4.1	hypothetical protein(C42D4.1)	14501.6	16158.6	14948.4	15042.6	7524.07	7680.44	7196.37	7226.34	2.94272e-109	-1.03362	7.21767e-112	0.488484	108.531
WBGene00044338	nspc-3	Nematode Specific Peptide family, group C(nspc-3)	68.9591	122.302	93.7296	106.876	72.3743	44.7922	21.0813	53.278	0.001751	-1.03418	0.000447781	0.488295	2.75671
WBGene00017133	EEED8.2	hypothetical protein(EEED8.2)	55.1672	73.3813	94.7374	70.559	27.6165	37.168	46.9537	31.7619	0.000194431	-1.03436	3.79877e-05	0.488233	3.71123
WBGene00008563	F07H5.13	hypothetical protein(F07H5.13)	98.6645	134.043	117.918	92.3493	51.4239	51.4634	61.3273	52.2534	7.01348e-07	-1.03455	8.41433e-08	0.488169	6.15407
WBGene00000715	col-142	COLlagen(col-142)	1303.86	1304.23	1358.57	1321.94	711.364	661.4	615.189	592.206	3.03943e-49	-1.03475	3.43317e-51	0.4881	48.5172
WBGene00044221	F41G3.18	hypothetical protein(F41G3.18)	106.091	122.302	124.973	111.027	56.1853	53.3695	54.6196	62.4992	2.60173e-08	-1.037	2.54581e-09	0.487339	7.58474
WBGene00003886	osm-6	hypothetical protein(osm-6)	35.01	37.1798	41.3216	32.1666	21.9028	13.3424	14.3736	21.5161	0.00345264	-1.03745	0.000965393	0.487189	2.46185
WBGene00018856	F55A4.4	pseudo	48.8018	37.1798	41.3216	30.0914	19.9982	20.0136	22.0395	14.3441	0.00265264	-1.03892	0.000713626	0.486693	2.57632
WBGene00018206	ugt-61	UDP-glucuronosyltransferase(ugt-61)	135.796	135.022	137.067	149.419	77.1358	60.0407	65.1602	68.6467	1.10153e-09	-1.04016	9.19306e-11	0.486272	8.958
WBGene00017787	nhr-141	Nuclear Hormone Receptor family(nhr-141)	47.7409	59.6834	41.3216	42.5429	21.9028	31.4499	20.123	19.467	0.00108314	-1.04042	0.000259303	0.486186	2.96531
WBGene00021389	Y38A10A.2	hypothetical protein(Y38A10A.2)	30.7663	31.3093	30.2353	31.129	14.2844	15.2484	22.0395	8.19662	0.00901145	-1.04112	0.0029187	0.485948	2.04521
WBGene00020326	math-38	MATH (meprin-associated Traf homology) domain containing(math-38)	626.997	613.467	624.864	566.548	334.255	271.613	283.639	292.004	3.00416e-29	-1.04133	6.41824e-31	0.485878	28.5223
WBGene00018413	cyp-33C4	CYtochrome P450 family(cyp-33C4)	282.202	262.216	250.953	288.462	119.037	122.94	139.903	144.465	3.03808e-16	-1.04276	1.38246e-17	0.485398	15.5174
WBGene00000757	col-184	COLlagen(col-184)	14252.2	12129.4	13102	12585.4	6705.1	6300.46	5922.87	6339.06	2.29098e-69	-1.04309	1.50829e-71	0.485287	68.64
WBGene00020182	ugt-53	UDP-GlucuronosylTransferase(ugt-53)	175.05	211.338	192.498	189.887	99.0386	97.2087	79.5338	97.3348	3.45787e-12	-1.04422	2.2252e-13	0.484908	11.4612
WBGene00001076	dpy-17	DumPY: shorter than wild-type(dpy-17)	563.342	602.705	601.683	538.531	341.874	221.102	276.931	277.66	2.5956e-18	-1.04537	1.03368e-19	0.48452	17.5858
WBGene00007309	C04G2.10	hypothetical protein(C04G2.10)	119.883	156.547	126.988	106.876	65.7083	63.8528	60.3691	57.3763	6.26132e-08	-1.04568	6.50259e-09	0.484415	7.20333
WBGene00017364	clec-7	C-type LECtin(clec-7)	792.499	744.575	804.26	795.864	389.488	326.888	375.63	428.273	1.16356e-31	-1.04604	2.25306e-33	0.484296	30.9342
WBGene00000716	col-143	COLlagen(col-143)	2038.01	1910.85	1848.39	1982.92	985.624	944.449	812.587	1021.5	5.87961e-45	-1.04771	7.24847e-47	0.483735	44.2307
WBGene00008654	F10F2.2	Probable phosphoribosylformylglycinamidine synthase(F10F2.2)	1791.87	1727.88	1811.1	1749.45	838.971	794.824	818.336	974.373	9.41638e-51	-1.04786	1.00284e-52	0.483684	50.0261
WBGene00011212	R10E8.6	hypothetical protein(R10E8.6)	466.8	447.137	428.334	456.558	232.36	187.746	215.604	234.628	2.33633e-24	-1.04801	6.42404e-26	0.483636	23.6315
WBGene00017842	nep-12	NEPrilysin metallopeptidase family(nep-12)	49.8627	32.2878	41.3216	33.2042	21.9028	19.0605	18.2065	16.3932	0.00229631	-1.04844	0.000606203	0.483489	2.63897
WBGene00013459	Y67A10A.10	hypothetical protein(Y67A10A.10)	108.213	136	118.926	108.951	49.5193	57.1816	66.1185	55.3272	5.73475e-08	-1.05016	5.91871e-09	0.482916	7.24149
WBGene00016874	C52B11.5	hypothetical protein(C52B11.5)	851.91	697.611	778.056	782.375	366.633	398.365	376.588	355.528	1.05078e-33	-1.05365	1.79053e-35	0.481749	32.9785
WBGene00003001	lin-12	Protein lin-12(lin-12)	182.476	162.417	172.341	175.36	89.5156	68.6179	84.325	91.1874	1.82968e-11	-1.0543	1.24593e-12	0.481532	10.7376
WBGene00006929	vit-5	Vitellogenin-5(vit-5)	463467	373717	393416	424410	169390	198915	197189	230996	1.46598e-33	-1.05511	2.53588e-35	0.481259	32.8339
WBGene00009859	clec-33	C-type LECtin(clec-33)	37.1318	35.223	38.2981	29.0537	13.3321	11.4363	20.123	22.5407	0.00458346	-1.05564	0.00133897	0.481085	2.33881
WBGene00008571	prmn-1	PRoMiNin (5-transmembrane domain glycoprotein) homolog(prmn-1)	323.577	323.856	339.644	342.419	165.699	162.968	161.942	148.564	3.6346e-22	-1.05566	1.12841e-23	0.481077	21.4395
WBGene00017690	ceh-60	C. Elegans Homeobox(ceh-60)	482.713	557.698	534.158	509.478	245.692	262.082	215.604	279.71	1.95626e-24	-1.05648	5.32849e-26	0.480805	23.7086
WBGene00000696	col-122	COLlagen(col-122)	26791.1	22990.8	23640	24514.1	12014.1	11770.8	10775.4	12525.5	2.00985e-67	-1.05655	1.3751e-69	0.480779	66.6968
WBGene00014052	ZK669.2	hypothetical protein(ZK669.2)	170.806	200.575	188.467	177.435	99.9909	105.786	81.4503	66.5975	5.47593e-10	-1.0572	4.38626e-11	0.480563	9.26154
WBGene00016368	nhr-163	Nuclear Hormone Receptor family(nhr-163)	71.0809	73.3813	80.6276	69.5214	34.2826	35.262	45.0372	26.639	1.83278e-05	-1.05838	2.83677e-06	0.480172	4.73689
WBGene00017443	F13H8.11	hypothetical protein(F13H8.11)	142.162	174.158	167.302	163.946	87.611	85.7724	77.6174	59.4255	8.97994e-10	-1.05891	7.39586e-11	0.479994	9.04673
WBGene00000213	asm-3	Putative sphingomyelin phosphodiesterase asm-3(asm-3)	995.132	845.352	963.5	876.8	487.574	404.083	375.63	498.969	5.67197e-25	-1.05977	1.50101e-26	0.47971	24.2463
WBGene00004335	ref-2	REgulator of Fusion(ref-2)	25.4618	28.3741	42.3295	31.129	14.2844	16.2015	18.2065	12.2949	0.00607026	-1.0602	0.00185011	0.479566	2.21679
WBGene00000680	col-106	COLlagen(col-106)	10579.4	9919.19	9792.22	9547.26	5156.67	4913.8	4214.33	4806.29	6.10945e-63	-1.06122	4.73203e-65	0.479226	62.214
WBGene00013329	Y57G11C.40	hypothetical protein(Y57G11C.40)	47.7409	61.6403	60.4707	46.6935	26.6642	24.7787	27.7889	24.5899	0.00017206	-1.06171	3.30727e-05	0.479063	3.76432
WBGene00015605	C08E3.13	hypothetical protein(C08E3.13)	145.344	146.763	143.114	167.059	88.5633	50.5104	76.6591	72.745	1.94506e-08	-1.06189	1.87186e-09	0.479003	7.71107
WBGene00008793	F14D7.6	hypothetical protein(F14D7.6)	172.928	144.806	163.271	140.08	84.7542	63.8528	69.9514	78.8924	5.52917e-10	-1.06226	4.43247e-11	0.478881	9.25734
WBGene00017201	grsp-4	Glycine Rich Secreted Protein(grsp-4)	244.009	213.295	205.6	191.962	101.895	94.3496	108.281	104.507	1.53314e-13	-1.06332	8.64883e-15	0.47853	12.8144
WBGene00003245	mig-13	hypothetical protein(mig-13)	138.979	134.043	141.098	125.554	71.422	69.5709	56.5361	60.45	1.06848e-09	-1.0639	8.89651e-11	0.478338	8.97123
WBGene00000239	bas-1	Biogenic Amine Synthesis related(bas-1)	215.364	206.446	206.608	222.053	93.3248	108.645	88.158	116.802	1.07386e-13	-1.06488	5.94006e-15	0.478011	12.9691
WBGene00235352	ZK250.13	hypothetical protein(ZK250.13)	336.308	387.453	302.353	341.381	161.89	142.954	160.026	189.547	8.85446e-17	-1.06519	3.88058e-18	0.477911	16.0528
WBGene00000700	col-126	COLlagen(col-126)	49.8627	57.7266	25.1961	40.4677	21.9028	17.1545	17.2483	26.639	0.00410402	-1.06591	0.00117534	0.477671	2.38679
WBGene00015057	gad-3	Probable aldehyde oxidase gad-3(gad-3)	1038.63	1179.97	1250.74	1081.21	529.475	533.695	534.697	576.837	1.89449e-41	-1.06611	2.56788e-43	0.477606	40.7225
WBGene00012398	Y6E2A.4	hypothetical protein(Y6E2A.4)	187.781	272.978	217.695	205.451	112.371	117.222	108.281	84.0153	2.16887e-10	-1.06645	1.67009e-11	0.477492	9.66377
WBGene00022285	Y75B7AL.2	hypothetical protein(Y75B7AL.2)	42.4363	41.0935	51.4001	21.7903	21.9028	20.0136	12.4571	20.4915	0.00600174	-1.06751	0.00182613	0.477141	2.22172
WBGene00011454	lron-14	eLRR (extracellular Leucine-Rich Repeat) ONly(lron-14)	33.9491	47.9424	33.2589	36.3171	22.8551	14.2954	13.4153	21.5161	0.00283708	-1.07511	0.000769104	0.474633	2.54713
WBGene00020568	T19D2.3	hypothetical protein(T19D2.3)	59.4109	59.6834	55.4315	44.6182	29.5211	25.7317	21.0813	27.6636	0.000148593	-1.07643	2.81208e-05	0.4742	3.828
WBGene00010111	F55D12.2	hypothetical protein(F55D12.2)	244.009	268.086	258.008	272.897	129.512	121.034	119.78	123.974	2.31432e-18	-1.07763	9.17185e-20	0.473807	17.6356
WBGene00019742	nhr-202	Nuclear Hormone Receptor family(nhr-202)	421.181	366.906	387.012	424.392	144.749	198.23	206.021	209.014	2.80758e-17	-1.07779	1.1924e-18	0.473753	16.5517
WBGene00021875	Y54G2A.10	hypothetical protein(Y54G2A.10)	86.9945	124.259	102.8	99.6127	41.9009	55.2755	51.7449	47.1305	4.10372e-07	-1.07849	4.77041e-08	0.473524	6.38682
WBGene00012533	fbxa-209	F-box A protein(fbxa-209)	83.8118	94.9064	76.5962	70.559	42.8532	42.8862	32.5801	35.8602	4.12865e-06	-1.07949	5.65482e-07	0.473196	5.38419
WBGene00016568	C41G11.1	hypothetical protein(C41G11.1)	1627.43	1713.21	1701.24	1589.65	722.791	816.744	747.426	851.424	4.09029e-57	-1.08008	3.64332e-59	0.473001	56.3882
WBGene00020569	lgc-32	Ligand-Gated ion Channel(lgc-32)	169.745	197.64	195.522	159.795	87.611	79.1012	85.2833	90.1628	3.57208e-12	-1.08045	2.30791e-13	0.47288	11.4471
WBGene00018694	F52E1.5	hypothetical protein(F52E1.5)	84.8727	83.1654	96.7531	67.4461	51.4239	35.262	35.4548	34.8356	9.4799e-06	-1.08067	1.39387e-06	0.472809	5.0232
WBGene00019589	K09F6.6	hypothetical protein(K09F6.6)	494.383	538.129	524.079	464.859	198.077	233.492	237.643	286.882	8.54019e-21	-1.08219	2.90498e-22	0.472312	20.0685
WBGene00015683	C10G8.4	hypothetical protein(C10G8.4)	875.249	931.453	876.825	934.907	405.677	433.627	390.961	478.478	8.1374e-41	-1.08358	1.12399e-42	0.471855	40.0895
WBGene00015610	C08F1.6	hypothetical protein(C08F1.6)	43.4972	51.8561	65.5099	34.2419	23.8073	27.6378	20.123	20.4915	0.000991281	-1.08388	0.00023456	0.471759	3.0038
WBGene00044404	F36H2.3	hypothetical protein(F36H2.5)	50.9236	39.1367	32.251	40.4677	19.9982	19.0605	19.1648	18.4424	0.00109476	-1.08399	0.000262578	0.471723	2.96068
WBGene00020155	T02B11.3	hypothetical protein(T02B11.3)	1053.48	1110.5	1059.25	862.273	504.716	476.513	517.449	425.2	1.9082e-29	-1.08608	4.02751e-31	0.471038	28.7194
WBGene00017051	afmd-1	ArylForMamiDase(afmd-1)	42.4363	64.5755	52.4079	60.1827	21.9028	29.5438	17.2483	34.8356	0.000529573	-1.08992	0.000116046	0.469788	3.27607
WBGene00009296	F31E9.3	hypothetical protein(F31E9.3)	88.0554	90.9928	76.5962	65.3709	28.5688	42.8862	33.5384	46.106	1.33313e-05	-1.09013	2.01265e-06	0.469719	4.87513
WBGene00009156	clec-196	C-type LECtin(clec-196)	94.4209	140.892	140.09	77.8225	59.0422	56.2286	59.4108	37.9094	2.38615e-05	-1.0915	3.75643e-06	0.469274	4.6223
WBGene00003553	nas-37	Zinc metalloproteinase nas-37(nas-37)	3127.56	3145.61	3160.6	2973.86	1396.06	1343.77	1443.11	1638.3	5.81586e-64	-1.09241	4.39202e-66	0.468976	63.2354
WBGene00022821	ZK813.2	hypothetical protein(ZK813.2)	2213.06	2383.42	2094.3	2069.04	952.294	1148.4	1019.57	987.692	3.66863e-50	-1.09243	4.0018e-52	0.468971	49.4355
WBGene00000295	cat-1	hypothetical protein(cat-1)	21.2182	29.3525	34.2667	37.3548	12.3798	20.9666	8.62415	15.3687	0.00971204	-1.09293	0.00318323	0.468809	2.01269
WBGene00000608	col-19	Cuticle collagen 19(col-19)	15415	13929.7	14421.3	14255	6763.19	7285.89	6521.77	6609.55	2.22434e-103	-1.09392	6.74781e-106	0.468487	102.653
WBGene00000705	col-131	COLlagen(col-131)	38.1927	37.1798	35.2746	36.3171	18.0936	18.1075	19.1648	13.3195	0.0012921	-1.09413	0.000316916	0.46842	2.8887
WBGene00021403	Y38C1AB.1	hypothetical protein(Y38C1AB.1)	36.0709	45.9856	36.2824	37.3548	12.3798	20.9666	19.1648	20.4915	0.00139086	-1.0957	0.000344011	0.467908	2.85672
WBGene00009887	glb-17	GLoBin related(glb-17)	105.03	114.475	99.7766	109.989	40.9486	49.5574	65.1602	45.0814	1.51626e-07	-1.09581	1.64417e-08	0.467874	6.81923
WBGene00001500	ftn-1	Ferritin(ftn-1)	180.354	223.079	214.671	203.376	120.941	92.4436	79.5338	89.1382	1.24767e-11	-1.10438	8.41553e-13	0.465101	10.9039
WBGene00017374	ttr-41	TransThyretin-Related family domain(ttr-41)	1564.84	1699.51	1550.07	1643.61	752.312	825.321	707.18	718.229	5.43882e-59	-1.10447	4.63386e-61	0.465074	58.2645
WBGene00021543	Y43B11AR.1	hypothetical protein(Y43B11AR.1)	928.295	1023.42	1008.85	994.052	414.248	468.889	458.038	497.944	2.19535e-46	-1.1056	2.63561e-48	0.464711	45.6585
WBGene00019268	H41C03.1	hypothetical protein(H41C03.1)	199.451	177.093	193.506	202.338	90.4679	100.068	96.7821	70.6958	8.87313e-13	-1.10628	5.38356e-14	0.464492	12.0519
WBGene00016920	C54E4.5	hypothetical protein(C54E4.5)	394.658	440.288	459.577	375.623	194.268	195.37	212.729	173.154	1.6968e-22	-1.10635	5.19127e-24	0.464468	21.7704
WBGene00008451	E01G6.3	Carboxylic ester hydrolase(E01G6.3)	329.943	284.719	287.236	260.446	154.272	124.846	132.237	128.072	3.5607e-17	-1.10652	1.52605e-18	0.464414	16.4485
WBGene00022314	Y77E11A.14	hypothetical protein(Y77E11A.14)	168.684	327.77	306.385	191.962	119.989	137.236	141.819	62.4992	0.00454101	-1.10752	0.00132335	0.46409	2.34285
WBGene00020446	T12B3.3	hypothetical protein(T12B3.3)	5453.07	5600.46	5719.52	5079.21	2489.3	2557.92	2514.42	2576.81	3.79555e-111	-1.1081	9.06444e-114	0.463904	110.421
WBGene00045252	Y62H9A.15	hypothetical protein(Y62H9A.15)	77.4463	93.928	87.6825	94.4246	42.8532	49.5574	32.5801	38.9339	8.82965e-07	-1.10848	1.07884e-07	0.463784	6.05406
WBGene00010644	K07G5.5	hypothetical protein(K07G5.5)	206.877	297.439	274.134	238.656	106.657	120.081	133.195	111.679	4.75077e-13	-1.10968	2.79655e-14	0.463395	12.3232
WBGene00020617	T20D4.11	hypothetical protein(T20D4.11)	58.35	72.4029	44.3452	62.258	20.9505	31.4499	22.9977	34.8356	0.000200668	-1.11005	3.94264e-05	0.463277	3.69752
WBGene00005016	sqt-1	Cuticle collagen sqt-1(sqt-1)	326.76	269.065	222.734	346.569	162.842	158.202	132.237	85.0399	4.07926e-08	-1.11145	4.11007e-09	0.462829	7.38942
WBGene00011456	T05A1.5	hypothetical protein(T05A1.5)	26.5227	21.5252	35.2746	32.1666	14.2844	11.4363	14.3736	13.3195	0.00561323	-1.11168	0.00169198	0.462756	2.25079
WBGene00023504	F26F2.8	hypothetical protein(F26F2.8)	35.01	36.2014	31.2432	32.1666	8.57065	14.2954	20.123	19.467	0.00368831	-1.11168	0.00103938	0.462754	2.43317
WBGene00021164	Y5H2B.1	hypothetical protein(Y5H2B.1)	64.7154	81.2086	65.5099	75.7472	39.9963	40.0271	21.0813	31.7619	3.46581e-05	-1.11187	5.65965e-06	0.462694	4.4602
WBGene00022246	acp-7	ACid Phosphatase family(acp-7)	251.435	298.417	277.157	231.392	119.037	143.907	115.947	110.654	4.58906e-15	-1.11221	2.26298e-16	0.462584	14.3383
WBGene00045458	F17B5.8	hypothetical protein(F17B5.8)	124.126	148.719	110.863	113.102	54.2808	62.8998	61.3273	51.2289	8.92338e-09	-1.11237	8.25353e-10	0.462533	8.04947
WBGene00006926	vit-2	VITellogenin structural genes (yolk protein genes)(vit-2)	1.54195e+06	1.25577e+06	1.40638e+06	1.37928e+06	557500	639909	662937	720770	4.77094e-46	-1.11314	5.7893e-48	0.462285	45.3214
WBGene00006055	ssr-2	Sperm-Specific family, class R(ssr-2)	21.2182	24.4604	27.2118	30.0914	15.2367	10.4833	9.58239	12.2949	0.00829695	-1.114	0.00265622	0.462012	2.08108
WBGene00001768	gst-20	Glutathione S-Transferase(gst-20)	585.621	757.295	759.915	681.725	305.686	341.184	352.632	286.882	1.01863e-24	-1.11404	2.74168e-26	0.461999	23.992
WBGene00020765	T24C12.3	hypothetical protein(T24C12.3)	347.978	372.777	384.997	361.096	196.173	162.968	147.569	171.104	5.20684e-22	-1.11408	1.63333e-23	0.461985	21.2834
WBGene00002248	lam-3	LAMinin related. See also lmb-(lam-3)	420.12	318.964	407.169	371.473	175.222	174.404	165.775	185.448	2.74854e-20	-1.11448	9.6331e-22	0.461858	19.5609
WBGene00004234	ptr-20	PaTched Related family(ptr-20)	192.024	171.223	176.373	180.548	83.8019	89.5845	73.7844	85.0399	1.16696e-13	-1.11584	6.48519e-15	0.461424	12.9329
WBGene00001958	hlh-14	Helix Loop Helix(hlh-14)	29.7054	33.2662	47.3687	29.0537	16.189	7.62421	18.2065	22.5407	0.00655635	-1.11607	0.00202704	0.46135	2.18334
WBGene00002103	ins-20	INSulin related(ins-20)	84.8727	64.5755	65.5099	58.1074	37.1395	38.1211	29.7054	20.4915	6.36576e-05	-1.11701	1.11184e-05	0.461048	4.19615
WBGene00004816	skr-10	SKp1 Related (ubiquitin ligase complex component)(skr-10)	43.4972	40.1151	75.5884	25.9408	19.0459	20.9666	25.8725	19.467	0.00423514	-1.1174	0.00121808	0.460925	2.37313
WBGene00015172	B0410.3	hypothetical protein(B0410.3)	664.129	619.338	590.597	573.811	315.209	266.847	262.557	281.759	2.93355e-32	-1.1196	5.50999e-34	0.460221	31.5326
WBGene00018489	F46E10.2	hypothetical protein(F46E10.2)	61.5327	53.8129	61.4785	54.9945	30.4734	32.4029	23.956	19.467	6.10183e-05	-1.12074	1.06102e-05	0.459857	4.21454
WBGene00011675	cyp-13A3	Putative cytochrome P450 CYP13A3(cyp-13A3)	65.7763	56.7482	53.4158	67.4461	22.8551	33.3559	23.956	31.7619	4.12135e-05	-1.12122	6.85784e-06	0.459704	4.38496
WBGene00000478	cfz-2	Caenorhabditis FriZzled homolog(cfz-2)	53.0454	43.0503	43.3373	48.7687	24.7596	20.9666	19.1648	21.5161	0.000197811	-1.12153	3.87757e-05	0.459605	3.70375
WBGene00009638	nspc-14	Nematode Specific Peptide family, group C(nspc-14)	294.933	312.115	278.165	216.865	118.084	166.78	113.072	107.581	5.32559e-11	-1.12361	3.85335e-12	0.458945	10.2736
WBGene00007295	C04C11.1	hypothetical protein(C04C11.1)	147.466	160.46	157.224	129.704	65.7083	68.6179	63.2438	75.8187	3.68265e-11	-1.1237	2.61467e-12	0.458915	10.4338
WBGene00006822	unc-93	Putative potassium channel regulatory protein unc-93(unc-93)	79.5681	106.647	96.7531	75.7472	32.378	54.3225	45.9955	31.7619	8.5392e-06	-1.12424	1.24453e-06	0.458743	5.06858
WBGene00010659	K08D8.5	hypothetical protein(K08D8.5)	254.618	307.223	234.828	273.935	103.8	123.893	145.652	117.826	1.65814e-14	-1.12438	8.49778e-16	0.458699	13.7804
WBGene00019058	F58F9.4	hypothetical protein(F58F9.4)	46.68	63.5971	64.5021	47.7311	23.8073	22.8726	23.956	31.7619	0.000111127	-1.12467	2.04352e-05	0.458606	3.95418
WBGene00016093	srsx-34	Serpentine Receptor, class SX(srsx-34)	256.74	269.065	297.314	265.634	139.987	114.363	112.114	133.195	6.05106e-18	-1.12469	2.4801e-19	0.458602	17.2182
WBGene00021527	aakg-3	AMP-Activated protein Kinase Gamma subunit(aakg-3)	35.01	27.3957	28.2197	34.2419	14.2844	19.0605	12.4571	11.2703	0.00343684	-1.12492	0.000960088	0.458527	2.46384
WBGene00001059	dpf-6	Dipeptidyl peptidase family member 6(dpf-6)	241.887	198.619	232.812	206.489	106.657	100.068	90.0745	106.556	4.3174e-15	-1.12506	2.12345e-16	0.458484	14.3648
WBGene00016571	C41H7.1	hypothetical protein(C41H7.1)	67.8981	49.8993	66.5178	64.3332	31.4257	28.5908	17.2483	36.8848	0.000120266	-1.12507	2.22166e-05	0.458479	3.91986
WBGene00021505	Y41D4A.3	hypothetical protein(Y41D4A.3)	33.9491	41.0935	45.353	23.8656	14.2844	20.0136	11.4989	20.4915	0.00365723	-1.1262	0.0010293	0.458122	2.43685
WBGene00000002	aat-1	Amino Acid Transporter(aat-1)	145.344	156.547	142.106	175.36	75.2312	62.8998	70.9097	74.7941	1.69748e-11	-1.12637	1.15043e-12	0.458068	10.7702
WBGene00020532	math-42	MATH (meprin-associated Traf homology) domain containing(math-42)	33.9491	22.5036	30.2353	38.3924	10.4752	21.9196	13.4153	11.2703	0.0065318	-1.12714	0.00201608	0.457821	2.18497
WBGene00016187	C28G1.2	hypothetical protein(C28G1.2)	124.126	128.173	109.855	102.726	49.5193	56.2286	49.8284	57.3763	4.11538e-09	-1.12765	3.65239e-10	0.45766	8.38559
WBGene00020836	lgc-34	Ligand-Gated ion Channel(lgc-34)	106.091	87.0791	73.5727	95.4622	30.4734	39.0741	42.1625	54.3026	3.64173e-06	-1.12793	4.92913e-07	0.457572	5.43869
WBGene00009640	nspc-10	Nematode Specific Peptide family, group C(nspc-10)	198.39	255.367	232.812	147.344	86.6587	116.269	78.5756	100.409	1.54118e-08	-1.12796	1.46428e-09	0.457563	7.81215
WBGene00016022	C23H3.9	hypothetical protein(C23H3.9)	745.819	719.136	703.476	707.666	319.971	343.09	331.551	320.693	1.04536e-47	-1.12827	1.22801e-49	0.457464	46.9807
WBGene00004801	sir-2.2	NAD-dependent protein deacylase sir-2.2(sir-2.2)	465.739	570.417	502.915	478.349	228.551	243.022	229.977	221.309	1.5686e-28	-1.12872	3.49298e-30	0.457323	27.8045
WBGene00045516	F43D2.7	pseudo	100.786	120.345	88.6904	89.2364	46.6624	40.9801	50.7867	44.0568	1.41064e-07	-1.12945	1.52236e-08	0.457089	6.85058
WBGene00011284	ttr-27	TransThyretin-Related family domain(ttr-27)	74.2636	99.7985	132.028	80.9354	38.0918	60.9937	47.9119	29.7127	5.99708e-05	-1.12954	1.04087e-05	0.457062	4.22206
WBGene00022867	ZK1240.2	hypothetical protein(ZK1240.2)	311.907	362.014	333.597	335.155	156.176	147.719	153.318	156.76	5.6802e-24	-1.12981	1.59118e-25	0.456975	23.2456
WBGene00009634	nspc-9	Nematode Specific Peptide family, group C(nspc-9)	157.014	196.662	180.404	142.156	72.3743	97.2087	75.7009	63.5238	9.75604e-10	-1.13011	8.09173e-11	0.456881	9.01073
WBGene00021726	bath-10	BTB and MATH domain containing(bath-10)	37.1318	42.0719	55.4315	24.9032	9.52294	19.0605	23.956	20.4915	0.00498716	-1.13026	0.00147493	0.456833	2.30215
WBGene00022487	fbxa-21	F-box A protein(fbxa-21)	151.71	172.201	173.349	153.57	60.9468	95.3027	62.2855	78.8924	4.32599e-10	-1.13093	3.41768e-11	0.456623	9.36391
WBGene00014941	Y67H2A.9	pseudo	513.48	430.503	414.224	522.967	206.648	244.928	207.938	194.67	1.42733e-21	-1.13753	4.58795e-23	0.454537	20.8455
WBGene00000515	ckc-1	Choline Kinase C(ckc-1)	335.247	314.072	322.51	321.666	142.844	132.471	136.07	177.252	1.47074e-20	-1.13786	5.09772e-22	0.454434	19.8325
WBGene00016809	C50D2.6	hypothetical protein(C50D2.6)	328.882	258.302	308.401	339.306	144.749	142.954	123.613	149.588	8.0647e-18	-1.1382	3.32104e-19	0.454326	17.0934
WBGene00008432	D2085.7	hypothetical protein(D2085.7)	62.5936	94.9064	86.6747	65.3709	26.6642	40.9801	39.2878	33.811	1.49654e-05	-1.13882	2.28549e-06	0.45413	4.82491
WBGene00001702	grd-13	GRounDhog (hedgehog-like family)(grd-13)	65.7763	50.8777	45.353	43.5806	21.9028	22.8726	25.8725	22.5407	0.000144117	-1.13999	2.71527e-05	0.453764	3.84129
WBGene00022179	Y71H2AM.14	hypothetical protein(Y71H2AM.14)	92.299	94.9064	95.7453	89.2364	48.567	44.7922	39.2878	35.8602	6.5483e-08	-1.14134	6.81331e-09	0.453338	7.18387
WBGene00044361	K09F6.11	hypothetical protein(K09F6.11)	85.9336	93.928	107.839	103.763	34.2826	52.4165	52.7031	37.9094	3.64721e-07	-1.1414	4.20207e-08	0.45332	6.43804
WBGene00000039	acn-1	Inactive angiotensin-converting enzyme-related protein(acn-1)	182.476	182.964	174.357	159.795	96.1817	81.9603	70.9097	67.6221	3.30828e-12	-1.1418	2.1268e-13	0.453193	11.4804
WBGene00008360	nspc-19	Nematode Specific Peptide family, group C(nspc-19)	462.556	545.957	502.915	396.376	207.6	253.505	206.98	195.694	1.72924e-19	-1.14307	6.35087e-21	0.452795	18.7621
WBGene00017529	F16G10.15	hypothetical protein(F16G10.15)	36.0709	38.1583	32.251	35.2795	19.0459	14.2954	11.4989	19.467	0.00138658	-1.14318	0.000342594	0.452759	2.85806
WBGene00044080	D1086.10	hypothetical protein(D1086.10)	6431.23	6554.42	6293.99	6475.87	2787.36	3152.61	2774.1	2942.59	4.00191e-113	-1.14376	9.04066e-116	0.452579	112.398
WBGene00004998	spp-13	SaPosin-like Protein family(spp-13)	29.7054	42.0719	40.3138	33.2042	10.4752	20.9666	23.956	10.2458	0.00395925	-1.14401	0.00112621	0.452502	2.40239
WBGene00012531	Y32F6B.1	Solute carrier organic anion transporter family member(Y32F6B.1)	3650.59	3648.52	3663.52	3953.38	1628.42	1878.42	1583.01	1653.67	2.30393e-75	-1.14516	1.29376e-77	0.45214	74.6375
WBGene00014003	ZK593.3	hypothetical protein(ZK593.3)	113.517	158.504	199.553	196.113	87.611	81.9603	64.202	67.6221	6.85506e-08	-1.14721	7.15018e-09	0.451499	7.16399
WBGene00006895	ver-2	pseudo	189.903	210.36	185.443	201.301	85.7065	81.0073	80.4921	108.605	6.59179e-14	-1.14823	3.59947e-15	0.45118	13.181
WBGene00007820	clec-199	C-type LECtin(clec-199)	120.944	101.755	85.6668	103.763	44.7578	43.8392	47.9119	49.1797	3.48926e-08	-1.14992	3.49309e-09	0.450651	7.45727
WBGene00015400	cyp-35A2	CYtochrome P450 family(cyp-35A2)	1633.8	1190.73	1232.59	1706.91	660.892	588.017	605.607	741.794	4.44903e-21	-1.15067	1.47602e-22	0.450416	20.3517
WBGene00007550	C13C4.6	hypothetical protein(C13C4.6)	138.979	148.719	141.098	171.209	73.3266	60.9937	62.2855	73.7696	2.19639e-11	-1.15103	1.51123e-12	0.450302	10.6583
WBGene00006609	tre-3	TREhalase(tre-3)	610.022	576.288	605.715	626.73	262.833	256.364	282.68	285.857	1.0608e-40	-1.15329	1.4721e-42	0.449598	39.9744
WBGene00014210	ZK1067.4	Transmembrane protein 151 homolog(ZK1067.4)	44.5582	43.0503	37.2903	45.6558	16.189	20.9666	23.956	15.3687	0.000379134	-1.15414	8.00702e-05	0.449335	3.42121
WBGene00005018	sqt-3	Cuticle collagen 1(sqt-3)	1143.66	985.266	854.653	1191.2	603.754	440.298	441.748	387.29	2.08123e-17	-1.15546	8.78543e-19	0.448924	16.6817
WBGene00194746	pals-20	hypothetical protein(Y82E9BR.25)	47.7409	60.6619	54.4236	52.9193	37.1395	18.1075	22.0395	19.467	0.000236041	-1.15551	4.72142e-05	0.448907	3.62701
WBGene00013100	zip-7	bZIP transcription factor family(zip-7)	54.1063	55.7698	79.6198	59.1451	28.5688	25.7317	30.6636	26.639	2.47108e-05	-1.15578	3.90287e-06	0.448825	4.60711
WBGene00009577	F40F8.4	hypothetical protein(F40F8.4)	167.624	178.072	134.043	162.908	65.7083	86.7254	63.2438	72.745	6.17352e-11	-1.1559	4.50671e-12	0.448786	10.2095
WBGene00012683	asp-17	ASpartyl Protease(asp-17)	441.338	313.093	329.565	478.349	145.701	204.901	187.815	161.883	1.75054e-12	-1.15644	1.0926e-13	0.448617	11.7568
WBGene00000373	cyp-14A5	CYtochrome P450 family(cyp-14A5)	369.196	423.655	526.095	391.188	204.743	175.357	190.69	196.719	6.18865e-19	-1.15663	2.35275e-20	0.448558	18.2084
WBGene00018191	frpr-7	FMRFamide Peptide Receptor family(frpr-7)	27.5836	44.0288	52.4079	44.6182	18.0936	23.8257	17.2483	16.3932	0.000943082	-1.15839	0.000221694	0.448013	3.02545
WBGene00013885	ZC412.3	pseudo	22.2791	24.4604	24.1883	29.0537	8.57065	8.57724	13.4153	14.3441	0.00742392	-1.15886	0.00233791	0.447867	2.12937
WBGene00001796	gtl-2	Gon-Two Like (TRP subfamily)(gtl-2)	58.35	65.5539	68.5335	59.1451	20.9505	40.0271	21.0813	30.7373	5.66885e-05	-1.15889	9.77678e-06	0.447858	4.2465
WBGene00019653	K11G9.2	Carboxylic ester hydrolase(K11G9.2)	119.883	144.806	146.138	116.215	52.3762	62.8998	55.5779	65.5729	5.34383e-10	-1.15907	4.277e-11	0.4478	9.27215
WBGene00001692	grd-3	GRounDhog (hedgehog-like family)(grd-3)	595.17	523.453	545.244	540.607	218.075	260.176	249.142	257.169	6.7426e-34	-1.16293	1.13588e-35	0.446603	33.1712
WBGene00011928	cutl-12	CUTiclin-Like(cutl-12)	99.7254	135.022	122.957	131.779	60.9468	42.8862	56.5361	58.4009	6.44468e-09	-1.16374	5.83118e-10	0.446354	8.1908
WBGene00022112	Y71F9AL.7	hypothetical protein(Y71F9AL.7)	51.9845	53.8129	59.4629	25.9408	18.0936	17.1545	31.6219	18.4424	0.00190409	-1.1643	0.000492462	0.446181	2.72031
WBGene00017716	F22F4.1	hypothetical protein(F22F4.1)	56.2281	58.705	36.2824	43.5806	21.9028	34.309	20.123	10.2458	0.00195952	-1.16473	0.000508566	0.446046	2.70785
WBGene00007808	best-7	BESTrophin (chloride channel) homolog(best-7)	1355.84	1356.09	1355.55	1395.62	555.187	644.246	577.818	659.828	2.96558e-62	-1.16521	2.33526e-64	0.445899	61.5279
WBGene00013520	best-21	BESTrophin (chloride channel) homolog(best-21)	207.938	234.82	224.749	199.225	104.752	114.363	93.9074	72.745	1.88008e-13	-1.1658	1.07031e-14	0.445718	12.7258
WBGene00018656	F49H12.5	hypothetical protein(F49H12.5)	258.862	287.655	279.173	259.408	104.752	143.907	115.947	118.851	2.51796e-18	-1.16669	1.00114e-19	0.445443	17.599
WBGene00018262	cyp-33C3	CYtochrome P450 family(cyp-33C3)	280.08	285.698	275.142	286.387	128.56	142.001	107.323	123.974	1.28808e-20	-1.16727	4.44795e-22	0.445264	19.8901
WBGene00021532	Y42G9A.2	hypothetical protein(Y42G9A.2)	57.2891	55.7698	58.455	46.6935	20.9505	27.6378	23.956	24.5899	3.24226e-05	-1.16813	5.25064e-06	0.444999	4.48915
WBGene00012729	Y39G8B.10	hypothetical protein(Y39G8B.10)	75.3245	63.5971	80.6276	83.0106	46.6624	35.262	29.7054	22.5407	1.32746e-05	-1.16854	2.00066e-06	0.444872	4.87698
WBGene00020674	T22B7.7	hypothetical protein(T22B7.7)	47.7409	69.4676	57.4472	30.0914	18.0936	38.1211	15.3318	19.467	0.00297337	-1.17	0.000813728	0.444422	2.52675
WBGene00007340	C05D12.2	hypothetical protein(C05D12.2)	186.72	162.417	202.577	210.639	79.9927	79.1012	77.6174	102.458	7.18587e-13	-1.17017	4.29492e-14	0.444368	12.1435
WBGene00016366	nhr-140	Nuclear Hormone Receptor family(nhr-140)	86.9945	112.518	109.855	105.839	50.4716	42.8862	51.7449	38.9339	2.01495e-08	-1.17311	1.94411e-09	0.443464	7.69574
WBGene00011682	snt-7	SyNapTotagmin(snt-7)	53.0454	42.0719	57.4472	51.8816	16.189	27.6378	18.2065	28.6882	0.000174816	-1.17458	3.36927e-05	0.443013	3.75742
WBGene00043302	F32D8.11	hypothetical protein(F32D8.11)	48.8018	74.3597	54.4236	39.43	20.9505	26.6847	21.0813	27.6636	0.000201684	-1.17504	3.9652e-05	0.442871	3.69533
WBGene00001762	gst-14	Glutathione S-Transferase(gst-14)	26.5227	49.8993	38.2981	22.8279	22.8551	14.2954	11.4989	12.2949	0.00595795	-1.17513	0.00181127	0.442843	2.2249
WBGene00009686	ent-7	Equilibrative Nucleoside Transporter(ent-7)	62.5936	79.2518	69.5413	60.1827	28.5688	39.0741	24.9142	27.6636	8.42242e-06	-1.17583	1.22534e-06	0.442629	5.07456
WBGene00001071	dpy-9	DumPY: shorter than wild-type(dpy-9)	44.5582	52.8345	55.4315	58.1074	19.9982	36.215	10.5406	26.639	0.000931146	-1.17682	0.000218588	0.442324	3.03098
WBGene00003633	nhr-43	Nuclear Hormone Receptor family(nhr-43)	71.0809	81.2086	73.5727	100.65	30.4734	41.9332	44.079	27.6636	3.52207e-06	-1.17703	4.7558e-07	0.442262	5.4532
WBGene00003876	pept-2	Peptide transporter family 2(pept-2)	787.194	800.345	767.978	800.015	332.351	356.432	331.551	376.02	5.68995e-52	-1.17708	5.8027e-54	0.442244	51.2449
WBGene00000402	cdh-10	CaDHerin family(cdh-10)	63.6545	62.6187	65.5099	48.7687	21.9028	26.6847	22.0395	35.8602	3.35492e-05	-1.18039	5.46341e-06	0.441232	4.47432
WBGene00010538	ttr-3	Transthyretin-like protein 3(ttr-3)	50.9236	49.8993	39.306	62.258	24.7596	33.3559	11.4989	19.467	0.000855389	-1.18157	0.000198319	0.440873	3.06784
WBGene00007368	C06B8.2	hypothetical protein(C06B8.2)	323.577	309.18	269.095	287.424	113.323	118.175	143.736	149.588	1.20425e-18	-1.18158	4.67926e-20	0.440869	17.9193
WBGene00019346	K02G10.5	Solute carrier organic anion transporter family member(K02G10.5)	35.01	32.2878	28.2197	32.1666	15.2367	16.2015	12.4571	12.2949	0.00145748	-1.1816	0.000362748	0.440864	2.8364
WBGene00008220	C50B6.7	Alpha-amylase(C50B6.7)	2693.65	2371.68	2388.59	2363.73	1092.28	1029.27	1072.27	1134.21	9.06458e-79	-1.18174	4.79762e-81	0.44082	78.0427
WBGene00001072	dpy-10	Cuticle collagen dpy-10(dpy-10)	182.476	202.532	221.726	178.473	86.6587	81.0073	81.4503	97.3348	1.1284e-14	-1.18268	5.7174e-16	0.440532	13.9475
WBGene00044281	R04A9.7	hypothetical protein(R04A9.7)	20.1573	30.3309	39.306	29.0537	8.57065	18.1075	14.3736	11.2703	0.00560786	-1.18394	0.00168999	0.440148	2.2512
WBGene00009158	F26E4.3	Uncharacterized peptidase C1-like protein F26E4.3(F26E4.3)	266.288	259.281	260.024	269.785	117.132	124.846	105.406	116.802	1.40077e-21	-1.18478	4.49354e-23	0.439893	20.8536
WBGene00000638	col-62	COLlagen(col-62)	337.369	395.28	358.793	282.236	179.031	163.921	121.696	139.342	2.57438e-15	-1.18533	1.24291e-16	0.439723	14.5893
WBGene00011209	R10E8.3	hypothetical protein(R10E8.3)	192.024	190.791	193.506	141.118	75.2312	78.1482	85.2833	76.8433	1.31438e-12	-1.1854	8.09346e-14	0.439702	11.8813
WBGene00044665	F59A6.12	hypothetical protein(F59A6.12)	457.252	518.561	504.93	515.703	218.075	234.445	202.188	223.358	5.09954e-34	-1.18561	8.52501e-36	0.439637	33.2925
WBGene00001675	gpa-13	G Protein, Alpha subunit(gpa-13)	25.4618	33.2662	27.2118	19.715	14.2844	16.2015	8.62415	7.17204	0.00815844	-1.18758	0.00260346	0.439037	2.08839
WBGene00013931	clec-97	C-type LECtin(clec-97)	1899.03	1802.24	1884.67	1725.58	701.841	869.16	757.967	880.112	8.4518e-52	-1.18848	8.72838e-54	0.438764	51.0731
WBGene00018261	cyp-33C5	CYtochrome P450 family(cyp-33C5)	62.5936	51.8561	61.4785	66.4085	29.5211	21.9196	20.123	34.8356	2.59314e-05	-1.19029	4.11407e-06	0.438213	4.58617
WBGene00019837	R02F2.8	hypothetical protein(R02F2.8)	157.014	136.978	160.247	151.494	69.5175	62.8998	35.4548	97.3348	8.9478e-07	-1.1945	1.09444e-07	0.436939	6.04828
WBGene00019592	K09F6.9	hypothetical protein(K09F6.9)	478.47	533.237	555.323	508.44	210.457	228.726	233.81	233.604	1.61444e-35	-1.19583	2.56343e-37	0.436536	34.792
WBGene00003096	lys-7	LYSozyme(lys-7)	2233.21	2616.29	2746.38	2680.21	1189.42	1101.7	1097.18	1092.2	7.01976e-62	-1.19763	5.61835e-64	0.435992	61.1537
WBGene00006538	tbb-4	Tubulin beta-4 chain(tbb-4)	36.0709	53.8129	43.3373	33.2042	20.9505	17.1545	21.0813	13.3195	0.000571217	-1.19781	0.000126167	0.435938	3.2432
WBGene00015613	C08F1.10	hypothetical protein(C08F1.10)	81.69	90.0144	97.761	60.1827	39.0441	35.262	35.4548	33.811	1.08316e-06	-1.19957	1.34722e-07	0.435405	5.96531
WBGene00020343	acs-3	fatty Acid CoA Synthetase family(acs-3)	67.8981	73.3813	77.6041	60.1827	24.7596	37.168	23.956	35.8602	5.16516e-06	-1.19963	7.19867e-07	0.435386	5.28692
WBGene00017154	ugt-57	UDP-GlucuronosylTransferase(ugt-57)	40.3145	30.3309	40.3138	22.8279	21.9028	8.57724	14.3736	13.3195	0.00403379	-1.20006	0.00115132	0.435257	2.39429
WBGene00006678	twk-25	TWiK family of potassium channels(twk-25)	113.517	112.518	114.894	139.043	61.8991	45.7453	49.8284	51.2289	7.2802e-10	-1.20079	5.94426e-11	0.435037	9.13786
WBGene00044398	nspc-11	pseudo	59.4109	84.1439	81.6354	50.844	38.0918	32.4029	24.9142	24.5899	3.27474e-05	-1.20159	5.30959e-06	0.434797	4.48482
WBGene00012407	Y7A5A.1	hypothetical protein(Y7A5A.1)	1878.87	1784.63	1804.04	2017.16	731.362	816.744	805.879	894.456	4.48538e-62	-1.20465	3.56098e-64	0.433875	61.3482
WBGene00018910	F56A4.2	hypothetical protein(F56A4.2)	2273.53	2224.92	2203.15	2514.18	929.439	1090.26	977.404	999.987	5.1219e-70	-1.20504	3.30594e-72	0.433758	69.2906
WBGene00010772	K11D9.3	hypothetical protein(K11D9.3)	396.78	458.878	408.177	428.542	199.982	193.464	176.316	163.932	1.07458e-28	-1.20504	2.36515e-30	0.433757	27.9688
WBGene00011094	R07B7.10	hypothetical protein(R07B7.10)	116.7	100.777	131.02	104.801	49.5193	53.3695	41.2043	52.2534	1.88923e-09	-1.20745	1.62181e-10	0.433034	8.72372
WBGene00001210	egl-46	hypothetical protein(egl-46)	33.9491	36.2014	42.3295	19.715	16.189	7.62421	20.123	13.3195	0.0050712	-1.20793	0.00150273	0.432889	2.29489
WBGene00021772	math-45	MATH (meprin-associated Traf homology) domain containing(math-45)	138.979	200.575	138.075	219.978	75.2312	66.7119	73.7844	86.0645	2.16536e-09	-1.21058	1.87143e-10	0.432094	8.66447
WBGene00020357	T08E11.1	hypothetical protein(T08E11.1)	37.1318	27.3957	26.204	25.9408	19.9982	11.4363	10.5406	8.19662	0.0046299	-1.21151	0.00135523	0.431818	2.33443
WBGene00011838	T19C4.1	hypothetical protein(T19C4.1)	61.5327	63.5971	76.5962	43.5806	19.9982	30.4968	25.8725	29.7127	4.01727e-05	-1.21183	6.66175e-06	0.43172	4.39607
WBGene00009835	F47H4.2	hypothetical protein(F47H4.2)	130.492	170.245	142.106	124.516	65.7083	51.4634	59.4108	68.6467	1.14878e-10	-1.21288	8.63086e-12	0.431407	9.93976
WBGene00010516	K02E11.7	hypothetical protein(K02E11.7)	48.8018	63.5971	48.3766	43.5806	23.8073	21.9196	23.956	18.4424	5.52225e-05	-1.21296	9.47406e-06	0.431382	4.25788
WBGene00012491	Y20C6A.1	hypothetical protein(Y20C6A.1)	198.39	220.144	226.765	245.919	94.2771	100.068	83.3668	106.556	5.5776e-17	-1.21514	2.43365e-18	0.430733	16.2536
WBGene00018692	F52E1.2	hypothetical protein(F52E1.2)	42.4363	38.1583	43.3373	38.3924	16.189	20.0136	18.2065	15.3687	0.000194579	-1.21602	3.80448e-05	0.430468	3.7109
WBGene00022441	Y110A2AL.4	hypothetical protein(Y110A2AL.4)	63.6545	88.0575	88.6904	61.2203	39.0441	29.5438	37.3713	23.5653	6.81575e-06	-1.21823	9.74433e-07	0.429808	5.16649
WBGene00017957	F31F4.1	hypothetical protein(F31F4.1)	520.906	497.036	497.875	517.779	222.837	197.276	216.562	236.677	4.91761e-38	-1.22017	7.23691e-40	0.429232	37.3082
WBGene00010426	H37A05.2	hypothetical protein(H37A05.2)	85.9336	56.7482	81.6354	76.7848	45.7101	27.6378	23.956	31.7619	1.15332e-05	-1.22035	1.7129e-06	0.42918	4.93805
WBGene00020323	arrd-23	ARRestin Domain protein(arrd-23)	25.4618	25.4388	26.204	24.9032	12.3798	11.4363	7.66591	12.2949	0.0037029	-1.22198	0.00104445	0.428693	2.43146
WBGene00016896	nep-4	NEPrilysin metallopeptidase family(nep-4)	188.842	248.518	195.522	227.242	75.2312	112.457	95.8239	85.0399	2.56155e-13	-1.22268	1.4748e-14	0.428487	12.5915
WBGene00044379	F40H7.12	hypothetical protein(F40H7.12)	68.9591	63.5971	80.6276	61.2203	36.1872	29.5438	24.9142	26.639	2.39221e-06	-1.22496	3.14442e-07	0.427809	5.6212
WBGene00044382	Y14H12A.2	hypothetical protein(Y14H12A.2)	25.4618	22.5036	23.1804	23.8656	11.4275	13.3424	11.4989	4.09831	0.00814973	-1.22645	0.00260015	0.427368	2.08886
WBGene00015593	C08E3.1	hypothetical protein(C08E3.1)	316.151	256.345	239.867	256.295	149.51	92.4436	124.571	89.1382	2.82062e-12	-1.22758	1.79145e-13	0.427034	11.5497
WBGene00007397	C07A4.2	hypothetical protein(C07A4.2)	79.5681	50.8777	46.3609	81.973	34.2826	25.7317	31.6219	18.4424	0.000115051	-1.2278	2.1216e-05	0.426969	3.93911
WBGene00019215	H20E11.3	hypothetical protein(H20E11.3)	337.369	366.906	370.887	346.569	139.035	191.558	137.028	137.293	2.22644e-21	-1.2322	7.21407e-23	0.425669	20.6524
WBGene00010740	K10D3.6	hypothetical protein(K10D3.6)	479.531	408	488.805	452.408	233.312	189.652	195.481	158.809	1.20561e-23	-1.23242	3.43948e-25	0.425602	22.9188
WBGene00012608	hphd-1	Probable hydroxyacid-oxoacid transhydrogenase, mitochondrial(Y38F1A.6)	4774.09	5351.94	4934.41	5500.49	1875.07	1922.25	2066.92	2883.16	5.19875e-13	-1.23313	3.06697e-14	0.425393	12.2841
WBGene00011006	ugt-47	Putative UDP-glucuronosyltransferase ugt-47(ugt-47)	586.682	590.964	584.55	609.09	252.358	201.089	216.562	339.135	1.95022e-19	-1.23444	7.22537e-21	0.425008	18.7099
WBGene00077755	Y40H7A.147	pseudo	198.39	153.611	170.326	146.306	66.6606	71.477	74.7426	70.6958	3.02072e-13	-1.23663	1.75671e-14	0.424362	12.5199
WBGene00019540	K08D12.6	hypothetical protein(K08D12.6)	16080.2	15073.5	14920.1	15570.7	6069.92	6907.54	6913.69	6237.63	3.97548e-115	-1.23825	8.72434e-118	0.423887	114.401
WBGene00013905	ugt-4	UDP-glucuronosyltransferase(ugt-4)	1242.32	1487.19	1420.05	1249.31	563.758	682.367	582.609	456.961	3.84158e-30	-1.23948	7.8602e-32	0.423527	29.4155
WBGene00009518	clec-166	C-type LECtin(clec-166)	200.512	182.964	225.757	207.527	90.4679	91.4905	72.8262	91.1874	2.61436e-16	-1.23951	1.18459e-17	0.423517	15.5826
WBGene00016976	C56E10.3	hypothetical protein(C56E10.3)	40.3145	26.4173	30.2353	24.9032	12.3798	8.57724	17.2483	13.3195	0.00253247	-1.24108	0.000676231	0.423057	2.59646
WBGene00019029	F58B6.1	hypothetical protein(F58B6.1)	240.826	245.583	260.024	222.053	88.5633	108.645	104.448	106.556	4.76566e-20	-1.24737	1.69796e-21	0.421216	19.3219
WBGene00011926	sptf-2	SP (Specificity Protein) Transcription Factor(sptf-2)	100.786	70.446	63.4942	80.9354	39.0441	40.0271	25.8725	27.6636	3.10705e-06	-1.24741	4.1573e-07	0.421203	5.50765
WBGene00007885	ugt-21	UDP-glucuronosyltransferase(ugt-21)	22.2791	30.3309	26.204	34.2419	14.2844	9.53027	10.5406	13.3195	0.00239698	-1.24809	0.000635719	0.421005	2.62034
WBGene00013313	Y57G11C.18	hypothetical protein(Y57G11C.18)	128.37	143.827	178.389	160.833	62.8514	60.9937	74.7426	58.4009	6.24733e-12	-1.25001	4.09284e-13	0.420446	11.2043
WBGene00019426	cutl-16	CUTiclin-Like(cutl-16)	86.9945	79.2518	95.7453	81.973	49.5193	29.5438	32.5801	32.7865	1.96729e-07	-1.25042	2.17896e-08	0.420325	6.70613
WBGene00015392	nspc-7	Nematode Specific Peptide family, group C(nspc-7)	227.034	165.352	187.459	139.043	117.132	90.5375	50.7867	43.0322	1.10998e-05	-1.2511	1.64495e-06	0.420128	4.95468
WBGene00002118	ins-35	INSulin related(ins-35)	14.8527	35.223	25.1961	23.8656	10.4752	11.4363	10.5406	9.22119	0.0068296	-1.25258	0.00212122	0.419696	2.1656
WBGene00011181	R09H10.3	Probable 5-hydroxyisourate hydrolase R09H10.3(R09H10.3)	498.627	485.295	493.844	520.892	232.36	193.464	174.399	237.702	5.17827e-30	-1.25518	1.06954e-31	0.41894	29.2858
WBGene00006775	unc-39	hypothetical protein(unc-39)	15.9136	33.2662	31.2432	16.6021	10.4752	11.4363	9.58239	9.22119	0.00890062	-1.25552	0.00287821	0.418842	2.05058
WBGene00016683	C45G9.12	hypothetical protein(C45G9.12)	43.4972	39.1367	51.4001	40.4677	6.66606	17.1545	25.8725	23.5653	0.00120114	-1.25558	0.000291816	0.418824	2.92041
WBGene00018811	pmt-2	Phosphoethanolamine MethylTransferase(pmt-2)	9317.96	8637.47	8658.4	8701.59	3431.11	3790.19	3729.47	3828.84	7.97799e-141	-1.25674	1.23586e-143	0.418488	140.098
WBGene00044484	hot-9	Homolog of Odr-2 (Two)(hot-9)	25.4618	20.5468	24.1883	30.0914	6.66606	13.3424	6.70767	15.3687	0.00648595	-1.2572	0.00199899	0.418356	2.18803
WBGene00016174	C27H5.4	hypothetical protein(C27H5.4)	620.631	563.568	535.166	680.687	249.501	301.156	219.437	230.53	2.31625e-26	-1.26112	5.72597e-28	0.417219	25.6352
WBGene00044696	F52E1.14	hypothetical protein(F52E1.14)	5343.8	5038.85	4923.32	4974.41	1999.82	2158.61	2154.12	2141.37	7.7528e-148	-1.26239	1.00081e-150	0.416853	147.111
WBGene00018333	cyp-33E3	CYtochrome P450 family(cyp-33E3)	33.9491	41.0935	52.4079	44.6182	19.9982	19.0605	17.2483	15.3687	0.00013325	-1.26241	2.48818e-05	0.416846	3.87533
WBGene00050904	Y70C5A.3	hypothetical protein(Y70C5A.3)	29.7054	45.9856	34.2667	41.5053	17.1413	19.0605	9.58239	17.4178	0.000619307	-1.26347	0.000137748	0.416542	3.20809
WBGene00045062	Y38H8A.8	pseudo	29.7054	42.0719	49.3844	37.3548	13.3321	18.1075	16.2901	18.4424	0.000314314	-1.26382	6.48996e-05	0.416439	3.50264
WBGene00012428	Y11D7A.3	hypothetical protein(Y11D7A.3)	97.6036	88.0575	101.792	80.9354	44.7578	32.4029	41.2043	34.8356	1.37178e-08	-1.26454	1.29626e-09	0.416232	7.86271
WBGene00016883	C52E2.4	hypothetical protein(C52E2.4)	510.297	653.583	627.887	509.478	239.026	277.331	209.854	231.554	2.29324e-25	-1.26505	5.97991e-27	0.416085	24.6396
WBGene00022562	ZC204.12	hypothetical protein(ZC204.12)	986.645	923.626	851.629	949.434	409.486	404.083	344.008	386.266	1.37927e-51	-1.26506	1.44222e-53	0.416083	50.8603
WBGene00002282	let-4	Leucine-rich repeat-containing protein let-4(let-4)	99.7254	115.453	129.004	103.763	60.9468	36.215	46.9537	42.0077	5.80486e-09	-1.26672	5.23048e-10	0.415604	8.23621
WBGene00015878	C17B7.4	hypothetical protein(C17B7.4)	42.4363	44.0288	33.2589	46.6935	16.189	13.3424	19.1648	20.4915	0.000159462	-1.26858	3.03629e-05	0.415067	3.79734
WBGene00007508	C10C5.4	Aminoacylase-1(C10C5.4)	1903.27	1941.18	2045.93	2058.66	806.593	936.825	762.758	791.998	7.00462e-71	-1.26886	4.3403e-73	0.414988	70.1546
WBGene00015599	fbxa-164	F-box A protein(fbxa-164)	337.369	425.611	409.185	417.128	159.033	169.639	173.441	156.76	7.36805e-28	-1.27056	1.68353e-29	0.414498	27.1326
WBGene00007341	C05D12.4	hypothetical protein(C05D12.4)	16.9745	40.1151	31.2432	21.7903	11.4275	7.62421	12.4571	14.3441	0.00604188	-1.27099	0.0018399	0.414375	2.21883
WBGene00018174	F38B6.4	hypothetical protein(F38B6.4)	750.062	690.762	805.268	769.924	319.971	333.559	298.012	297.127	2.0595e-49	-1.27148	2.313e-51	0.414236	48.6862
WBGene00022490	Y119D3B.13	hypothetical protein(Y119D3B.13)	1877.81	1867.8	1852.42	1768.13	783.738	736.69	709.097	821.711	1.63652e-91	-1.27215	6.44342e-94	0.414044	90.7861
WBGene00009943	F52G2.3	hypothetical protein(F52G2.3)	386.171	430.503	353.754	377.698	175.222	147.719	153.318	164.957	1.46923e-28	-1.27231	3.26222e-30	0.413996	27.8329
WBGene00019565	cyp-35A3	CYtochrome P450 family(cyp-35A3)	68.9591	53.8129	40.3138	84.0483	23.8073	24.7787	23.956	29.7127	4.57587e-05	-1.2731	7.71457e-06	0.413769	4.33953
WBGene00008436	DH11.2	hypothetical protein(DH11.2)	281.141	434.417	334.605	308.177	122.846	118.175	152.36	169.055	1.81378e-14	-1.27451	9.35396e-16	0.413367	13.7414
WBGene00003539	nas-20	Zinc metalloproteinase nas-20(nas-20)	239.765	277.87	297.314	271.86	92.3725	117.222	112.114	128.072	7.4549e-20	-1.27502	2.67535e-21	0.41322	19.1276
WBGene00012420	Y7A9D.1	hypothetical protein(Y7A9D.1)	94.4209	94.9064	115.902	70.559	47.6147	30.4968	43.1208	33.811	2.6372e-07	-1.27653	2.97373e-08	0.412788	6.57886
WBGene00016266	idhg-2	Isocitrate dehydrogenase [NAD] subunit, mitochondrial(idhg-2)	274.775	315.05	285.22	314.403	108.562	117.222	132.237	133.195	6.62313e-24	-1.27741	1.85959e-25	0.412536	23.1789
WBGene00009261	F30A10.2	hypothetical protein(F30A10.2)	18.0354	18.5899	21.1647	26.9785	8.57065	10.4833	9.58239	6.14746	0.00747695	-1.28053	0.00235606	0.411644	2.12628
WBGene00010321	F59B10.5	hypothetical protein(F59B10.5)	110.334	115.453	113.886	105.839	44.7578	48.6044	47.9119	42.0077	2.60528e-11	-1.28063	1.81443e-12	0.411617	10.5841
WBGene00006956	wrt-10	WaRThog (hedgehog-like family)(wrt-10)	153.832	213.295	176.373	129.704	73.3266	58.1346	69.9514	75.8187	5.80313e-11	-1.28232	4.22883e-12	0.411134	10.2363
WBGene00021525	Y41D4B.26	hypothetical protein(Y41D4B.26)	23.34	17.6115	29.2275	19.715	11.4275	5.71816	9.58239	10.2458	0.00698589	-1.28266	0.00218058	0.411037	2.15578
WBGene00009295	fbxa-180	pseudo	181.415	135.022	163.271	171.209	73.3266	74.3361	51.7449	67.6221	1.31035e-12	-1.28426	8.06021e-14	0.410583	11.8826
WBGene00017747	F23F1.6	hypothetical protein(F23F1.6)	198.39	258.302	217.695	191.962	70.4698	100.068	110.197	74.7941	6.27191e-13	-1.28461	3.73444e-14	0.410482	12.2026
WBGene00022349	Y82E9BR.17	hypothetical protein(Y82E9BR.17)	117.761	143.827	162.263	86.1235	61.8991	45.7453	55.5779	46.106	5.53966e-08	-1.28476	5.71021e-09	0.410438	7.25652
WBGene00011579	T07D4.2	UPF0046 protein T07D4.2(T07D4.2)	245.07	287.655	249.946	228.279	117.132	90.5375	98.6986	108.605	1.64385e-19	-1.28591	6.02663e-21	0.410111	18.7841
WBGene00004401	rom-2	Rhomboid-related protein 2(rom-2)	26.5227	25.4388	29.2275	28.0161	9.52294	9.53027	11.4989	14.3441	0.00166904	-1.28638	0.00042339	0.409978	2.77753
WBGene00021168	cyp-33C12	CYtochrome P450 family(cyp-33C12)	28.6445	34.2446	30.2353	32.1666	12.3798	18.1075	11.4989	9.22119	0.000978271	-1.28757	0.000231103	0.40964	3.00954
WBGene00018614	pals-31	hypothetical protein(F48G7.2)	85.9336	98.8201	109.855	108.951	36.1872	41.9332	45.0372	42.0077	9.27745e-10	-1.28978	7.66484e-11	0.409014	9.03257
WBGene00001760	gst-12	Glutathione S-Transferase(gst-12)	18.0354	17.6115	23.1804	19.715	6.66606	8.57724	6.70767	10.2458	0.00860194	-1.29057	0.00276997	0.408789	2.0654
WBGene00001244	elo-6	Elongation of very long chain fatty acids protein 6(elo-6)	1315.53	1150.62	1008.85	1209.88	478.052	420.285	421.625	595.279	6.24573e-29	-1.29126	1.36259e-30	0.408594	28.2044
WBGene00001392	far-8	Fatty Acid/Retinol binding protein(far-8)	420.12	434.417	463.609	370.435	180.936	171.545	171.525	164.957	1.38612e-31	-1.29324	2.69297e-33	0.408033	30.8582
WBGene00007507	C10C5.3	Aminoacylase-1(C10C5.3)	881.615	1174.1	1088.47	1024.14	395.202	502.245	411.085	390.364	1.39117e-33	-1.29486	2.39749e-35	0.407575	32.8566
WBGene00011167	chil-23	CHItinase-Like(chil-23)	85.9336	68.4892	63.4942	67.4461	27.6165	22.8726	22.9977	43.0322	3.70292e-06	-1.29678	5.03346e-07	0.407035	5.43146
WBGene00022440	Y110A2AL.3	hypothetical protein(Y110A2AL.3)	20.1573	28.3741	28.2197	22.8279	10.4752	17.1545	8.62415	4.09831	0.00761367	-1.29738	0.00240519	0.406865	2.11841
WBGene00017307	F09F9.2	hypothetical protein(F09F9.2)	25.4618	36.2014	16.1255	26.9785	9.52294	14.2954	10.5406	8.19662	0.00471099	-1.29806	0.00138321	0.406672	2.32689
WBGene00018195	btb-16	BTB (Broad/complex/Tramtrack/Bric a brac) domain protein(btb-16)	448.764	457.899	395.075	459.671	183.793	191.558	148.527	192.62	4.28994e-30	-1.29827	8.80527e-32	0.406614	29.3675
WBGene00016595	C42D4.2	hypothetical protein(C42D4.2)	128.37	173.18	178.389	127.629	63.8037	73.383	61.3273	48.1551	1.03408e-10	-1.2995	7.71569e-12	0.406267	9.98545
WBGene00011462	vap-2	Venom-Allergen-like Protein(vap-2)	44.5582	59.6834	67.5256	62.258	20.9505	24.7787	26.8307	22.5407	5.16516e-06	-1.29985	7.20115e-07	0.406169	5.28692
WBGene00021576	fbxc-51	F-box C protein(fbxc-51)	106.091	109.583	102.8	89.2364	58.0899	39.0741	38.3296	29.7127	2.53958e-08	-1.30022	2.48008e-09	0.406063	7.59524
WBGene00022130	Y71F9B.9	hypothetical protein(Y71F9B.9)	178.233	183.942	203.585	159.795	85.7065	60.9937	65.1602	82.9907	2.28715e-14	-1.30091	1.19429e-15	0.405869	13.6407
WBGene00017131	E04F6.15	hypothetical protein(E04F6.15)	77.4463	86.1007	57.4472	80.9354	24.7596	38.1211	23.956	35.8602	1.28343e-06	-1.30105	1.61288e-07	0.405829	5.89163
WBGene00019495	sdz-24	SKN-1 Dependent Zygotic transcript(sdz-24)	101.847	64.5755	63.4942	58.1074	22.8551	15.2484	26.8307	52.2534	0.000390699	-1.30232	8.27647e-05	0.405472	3.40816
WBGene00006632	tsp-6	Tetraspanin(tsp-6)	50.9236	49.8993	54.4236	58.1074	22.8551	24.7787	17.2483	21.5161	6.07484e-06	-1.30361	8.59488e-07	0.40511	5.21647
WBGene00017991	clec-180	C-type lectin domain-containing protein 180(clec-180)	75.3245	101.755	76.5962	107.914	31.4257	54.3225	25.8725	34.8356	1.7607e-06	-1.30369	2.27176e-07	0.405089	5.75431
WBGene00006980	zig-3	2 (Zwei) IG domain protein(zig-3)	73.2027	75.3381	93.7296	54.9945	36.1872	26.6847	29.7054	27.6636	1.07844e-06	-1.30567	1.33995e-07	0.404533	5.96721
WBGene00043980	F11D5.7	hypothetical protein(F11D5.7)	115.639	146.763	112.879	83.0106	40.9486	55.2755	43.1208	46.106	1.54791e-08	-1.30643	1.47322e-09	0.404321	7.81026
WBGene00011052	arrd-11	ARRestin Domain protein(arrd-11)	24.4009	57.7266	45.353	38.3924	11.4275	22.8726	11.4989	21.5161	0.00138012	-1.30656	0.000340739	0.404283	2.86008
WBGene00017487	F15E6.6	hypothetical protein(F15E6.6)	641.85	683.913	675.256	649.558	282.831	266.847	259.683	261.267	7.41094e-56	-1.30783	6.88812e-58	0.403927	55.1301
WBGene00001758	gst-10	Glutathione S-Transferase(gst-10)	74.2636	60.6619	83.6511	78.8601	39.0441	29.5438	30.6636	20.4915	8.42983e-07	-1.30795	1.02618e-07	0.403895	6.07418
WBGene00045455	F26G1.11	hypothetical protein(F26G1.11)	29.7054	37.1798	36.2824	39.43	14.2844	13.3424	7.66591	22.5407	0.000845188	-1.30938	0.00019579	0.403495	3.07305
WBGene00017247	F08D12.3	hypothetical protein(F08D12.3)	86.9945	85.1223	112.879	101.688	53.3285	41.9332	36.4131	23.5653	2.59636e-07	-1.31237	2.92599e-08	0.402658	6.58564
WBGene00010034	F54B11.11	hypothetical protein(F54B11.11)	460.434	501.928	526.095	406.752	186.65	188.699	159.068	229.505	9.68388e-25	-1.31286	2.6002e-26	0.402523	24.014
WBGene00010142	F56A8.8	hypothetical protein(F56A8.8)	31.8273	39.1367	42.3295	21.7903	15.2367	10.4833	15.3318	13.3195	0.000920399	-1.31472	0.000215589	0.402003	3.03602
WBGene00014300	D2023.1	hypothetical protein(D2023.1)	101.847	80.2302	66.5178	73.6719	31.4257	31.4499	32.5801	33.811	8.95115e-08	-1.3173	9.45784e-09	0.401285	7.04812
WBGene00019986	R09F10.1	hypothetical protein(R09F10.1)	1136.23	1158.45	1115.68	1137.25	459.958	461.265	446.539	456.961	2.62363e-92	-1.31749	1.01606e-94	0.401233	91.5811
WBGene00008358	nspc-18	Nematode Specific Peptide family, group C(nspc-18)	169.745	213.295	203.585	140.08	73.3266	81.9603	77.6174	58.4009	2.33846e-12	-1.31803	1.4671e-13	0.401083	11.6311
WBGene00013875	ZC376.3	hypothetical protein(ZC376.3)	187.781	218.187	236.844	229.317	76.1835	99.1148	86.2415	88.1136	2.21354e-18	-1.31928	8.72956e-20	0.400734	17.6549
WBGene00015055	pitr-3	Phosphate transporter(pitr-3)	198.39	212.316	174.357	187.812	79.9927	87.6784	68.9932	72.745	2.02231e-17	-1.32008	8.52365e-19	0.400514	16.6942
WBGene00008390	D1086.3	hypothetical protein(D1086.3)	14.8527	45.9856	22.1726	25.9408	10.4752	8.57724	13.4153	11.2703	0.00705952	-1.32122	0.00220812	0.400196	2.15122
WBGene00020672	T22B7.3	hypothetical protein(T22B7.3)	61.5327	93.928	101.792	69.5214	27.6165	44.7922	30.6636	27.6636	1.82792e-06	-1.32172	2.36557e-07	0.400059	5.73804
WBGene00015665	C10A4.4	hypothetical protein(C10A4.4)	57.2891	69.4676	70.5491	62.258	28.5688	27.6378	21.0813	26.639	4.8715e-07	-1.3218	5.70694e-08	0.400034	6.31234
WBGene00001391	far-7	Fatty Acid/Retinol binding protein(far-7)	478.47	508.777	508.962	514.666	221.884	189.652	189.731	202.866	1.78936e-42	-1.32258	2.3792e-44	0.399819	41.7473
WBGene00044990	T25B9.11	hypothetical protein(T25B9.11)	39.2536	44.0288	35.2746	36.3171	17.1413	17.1545	20.123	7.17204	0.000351981	-1.32417	7.36313e-05	0.399378	3.45348
WBGene00018393	msra-1	Methionine Sulfoxide Reductase A(msra-1)	611.083	816	621.84	594.564	246.644	260.176	293.221	255.12	4.6819e-29	-1.32546	1.01537e-30	0.399021	28.3296
WBGene00016204	gsto-1	Glutathione transferase omega-1(gsto-1)	146.405	111.54	125.981	142.156	48.567	54.3225	58.4526	48.1551	2.79162e-12	-1.32604	1.76942e-13	0.398862	11.5541
WBGene00011571	ttr-46	Transthyretin-like protein 46(ttr-46)	3559.35	3763.97	3437.76	3324.58	1299.88	1485.77	1409.57	1411.87	6.56407e-109	-1.32905	1.65235e-111	0.398031	108.183
WBGene00010473	hrg-2	Heme Responsive Gene(hrg-2)	32.8882	33.2662	18.1412	20.7527	9.52294	11.4363	9.58239	11.2703	0.00297091	-1.33016	0.000812862	0.397725	2.52711
WBGene00000449	ceh-27	C. Elegans Homeobox(ceh-27)	39.2536	35.223	50.3922	31.129	22.8551	13.3424	14.3736	11.2703	0.000371279	-1.33155	7.81626e-05	0.39734	3.4303
WBGene00022642	lipl-5	LIPase Like(lipl-5)	7832.69	7046.56	7376.42	7624.53	3029.25	2868.61	2889.09	3073.73	1.0106e-162	-1.33302	1.17413e-165	0.396936	161.995
WBGene00009830	cutl-18	CUTiclin-Like(cutl-18)	18.0354	21.5252	23.1804	30.0914	10.4752	8.57724	13.4153	4.09831	0.00627234	-1.33739	0.00192385	0.395736	2.20257
WBGene00016422	noah-1	NOmpA Homolog (Drosophila nompA: no mechanoreceptor potential A)(noah-1)	581.378	540.086	559.354	436.843	264.738	183.934	182.065	206.965	8.90829e-23	-1.33783	2.66795e-24	0.395616	22.0502
WBGene00011244	R11D1.3	hypothetical protein(R11D1.3)	15.9136	26.4173	18.1412	20.7527	7.61835	5.71816	6.70767	12.2949	0.00835124	-1.33799	0.0026767	0.395572	2.07825
WBGene00013693	Y105E8B.9	hypothetical protein(Y105E8B.9)	474.226	580.201	576.487	439.956	187.602	224.914	211.771	194.67	2.47253e-28	-1.33872	5.52182e-30	0.395371	27.6069
WBGene00007755	C27A7.3	Ectonucleotide pyrophosphatase/phosphodiesterase C27A7.3(C27A7.3)	64.7154	67.5108	59.4629	54.9945	31.4257	20.0136	19.1648	26.639	1.54514e-06	-1.34443	1.97169e-07	0.393808	5.81103
WBGene00001828	hch-1	Zinc metalloproteinase nas-34(hch-1)	68.9591	85.1223	100.784	94.4246	52.3762	23.8257	35.4548	25.6144	1.73844e-06	-1.34538	2.24192e-07	0.39355	5.75984
WBGene00003643	nhr-53	Nuclear hormone receptor family member nhr-53(nhr-53)	80.629	131.108	116.91	108.951	43.8055	46.6983	50.7867	30.7373	1.14606e-08	-1.34559	1.07556e-09	0.393492	7.94079
WBGene00020449	fbxa-54	F-box A protein(fbxa-54)	88.0554	116.432	107.839	80.9354	32.378	32.4029	42.1625	48.1551	1.18229e-08	-1.34684	1.11109e-09	0.393153	7.92728
WBGene00018435	btb-9	BTB (Broad/complex/Tramtrack/Bric a brac) domain protein(btb-9)	279.019	279.827	253.977	285.349	116.18	103.88	94.8657	116.802	2.26382e-25	-1.34772	5.87398e-27	0.392914	24.6452
WBGene00012899	Y46G5A.7	hypothetical protein(Y46G5A.7)	32.8882	47.9424	33.2589	23.8656	14.2844	11.4363	18.2065	10.2458	0.000836502	-1.34809	0.000193508	0.392811	3.07753
WBGene00004007	pgp-13	P-GlycoProtein related(pgp-13)	107.152	81.2086	89.6982	95.4622	31.4257	31.4499	31.6219	52.2534	2.44515e-08	-1.35173	2.38471e-09	0.391821	7.61169
WBGene00009560	psa-3	Phasmid Socket Absent(psa-3)	82.7509	84.1439	67.5256	60.1827	30.4734	30.4968	29.7054	24.5899	1.15748e-07	-1.35218	1.23645e-08	0.3917	6.93649
WBGene00009677	F44A6.5	hypothetical protein(F44A6.5)	221.73	317.986	227.773	224.129	90.4679	83.8663	92.9492	121.925	9.31101e-15	-1.3525	4.67564e-16	0.391614	14.031
WBGene00008905	F17B5.1	hypothetical protein(F17B5.1)	137.918	118.388	99.7766	107.914	39.9963	45.7453	50.7867	45.0814	3.81189e-11	-1.35255	2.71135e-12	0.391598	10.4189
WBGene00001604	gln-3	GLutamiNe synthetase (glutamate-ammonia ligase)(gln-3)	8051.23	7064.17	7059.95	7663.96	2720.7	2924.84	2996.41	3036.85	2.13286e-118	-1.35333	4.40532e-121	0.391387	117.671
WBGene00011699	cyp-34A2	CYtochrome P450 family(cyp-34A2)	312.968	358.101	396.083	373.548	153.319	124.846	137.986	147.539	5.75722e-28	-1.35478	1.30804e-29	0.390995	27.2398
WBGene00004000	pgp-6	P-GlycoProtein related(pgp-6)	232.339	287.655	263.048	261.483	112.371	95.3027	108.281	92.2119	5.67179e-23	-1.35531	1.684e-24	0.390851	22.2463
WBGene00018225	nep-14	pseudo	206.877	226.014	180.404	245.919	82.8496	104.833	71.8679	75.8187	8.53095e-16	-1.35607	4.01411e-17	0.390645	15.069
WBGene00020788	nep-22	NEPrilysin metallopeptidase family(nep-22)	892.224	1010.7	952.413	883.026	367.585	374.539	344.966	373.971	7.8172e-66	-1.35609	5.5502e-68	0.390639	65.1069
WBGene00011229	R11.4	hypothetical protein(R11.4)	27.5836	25.4388	32.251	29.0537	10.4752	10.4833	13.4153	10.2458	0.000737939	-1.35618	0.00016785	0.390615	3.13198
WBGene00010790	sodh-1	Alcohol dehydrogenase 1(sodh-1)	4706.19	4260.03	4536.31	4513.7	1982.68	1780.25	1620.38	1647.52	9.25207e-91	-1.35722	3.76222e-93	0.390334	90.0338
WBGene00010322	F59B10.6	hypothetical protein(F59B10.6)	18.0354	22.5036	25.1961	31.129	8.57065	14.2954	7.66591	7.17204	0.00375376	-1.3581	0.00106049	0.390095	2.42553
WBGene00011003	R04B5.5	hypothetical protein(R04B5.5)	626.997	750.446	764.954	665.123	281.879	318.311	253.933	238.726	5.86323e-36	-1.36065	9.15833e-38	0.389407	35.2319
WBGene00008375	D1054.8	hypothetical protein(D1054.8)	90.1772	104.691	115.902	80.9354	34.2826	40.9801	34.4966	43.0322	1.57115e-09	-1.36096	1.3376e-10	0.389323	8.80378
WBGene00001108	dsl-6	Delta-like protein(dsl-6)	36.0709	32.2878	35.2746	31.129	13.3321	10.4833	15.3318	13.3195	0.000216074	-1.36102	4.27741e-05	0.389307	3.6654
WBGene00003731	nhx-3	Probable Na(+)/H(+) antiporter nhx-3(nhx-3)	131.553	167.309	145.13	128.666	53.3285	51.4634	50.7867	67.6221	3.45089e-13	-1.36318	2.01356e-14	0.388724	12.4621
WBGene00015369	ugt-51	UDP-GlucuronosylTransferase(ugt-51)	256.74	244.604	222.734	290.537	85.7065	119.128	99.6568	89.1382	2.2762e-19	-1.36452	8.46248e-21	0.388365	18.6428
WBGene00011674	cyp-13A8	Putative cytochrome P450 CYP13A8(cyp-13A8)	32.8882	52.8345	53.4158	30.0914	19.9982	16.2015	19.1648	10.2458	0.000301944	-1.36514	6.20142e-05	0.388197	3.52007
WBGene00194985	Y25C1A.14	hypothetical protein(Y25C1A.14)	502.871	536.173	548.268	469.01	192.363	208.713	211.771	184.424	9.76056e-42	-1.36655	1.3167e-43	0.387818	41.0105
WBGene00008597	clec-55	C-type LECtin(clec-55)	336.308	258.302	299.33	391.188	122.846	117.222	115.947	142.416	1.83245e-19	-1.36677	6.75358e-21	0.387758	18.737
WBGene00007658	pals-4	hypothetical protein(C17H1.5)	26.5227	26.4173	28.2197	34.2419	8.57065	13.3424	9.58239	13.3195	0.000803289	-1.36679	0.000184892	0.387752	3.09513
WBGene00015040	cyp-34A5	CYtochrome P450 family(cyp-34A5)	36.0709	34.2446	35.2746	37.3548	17.1413	11.4363	12.4571	14.3441	0.000129344	-1.36805	2.40271e-05	0.387414	3.88825
WBGene00006952	wrt-6	Warthog protein 6 N-product(wrt-6)	154.893	108.604	139.083	182.623	50.4716	73.383	62.2855	39.9585	2.71264e-09	-1.36829	2.36894e-10	0.387349	8.56661
WBGene00011676	cyp-13A2	Putative cytochrome P450 CYP13A2(cyp-13A2)	343.734	340.489	369.879	364.209	128.56	142.954	127.446	150.613	2.5978e-33	-1.36897	4.59431e-35	0.387168	32.5854
WBGene00019183	npr-30	NeuroPeptide Receptor family(npr-30)	50.9236	47.9424	54.4236	42.5429	17.1413	20.0136	19.1648	19.467	5.81177e-06	-1.37019	8.17391e-07	0.38684	5.23569
WBGene00022261	clec-210	C-type LECtin(clec-210)	129.431	155.568	147.145	130.742	50.4716	46.6983	60.3691	60.45	6.12107e-14	-1.37121	3.31477e-15	0.386567	13.2132
WBGene00015781	C14F11.6	hypothetical protein(C14F11.6)	56.2281	57.7266	64.5021	57.0698	19.9982	32.4029	22.9977	15.3687	3.30898e-06	-1.37166	4.4574e-07	0.386445	5.48031
WBGene00010835	M03B6.3	hypothetical protein(M03B6.3)	99.7254	91.9712	80.6276	113.102	39.9963	30.4968	34.4966	44.0568	1.76959e-09	-1.37214	1.51339e-10	0.386317	8.75213
WBGene00021513	Y41D4B.6	hypothetical protein(Y41D4B.6)	32.8882	18.5899	32.251	26.9785	15.2367	5.71816	12.4571	9.22119	0.00258362	-1.37317	0.000692056	0.386041	2.58777
WBGene00001777	gst-29	Glutathione S-Transferase(gst-29)	64.7154	57.7266	58.455	68.4838	13.3321	30.4968	29.7054	22.5407	3.69647e-06	-1.37493	5.01754e-07	0.38557	5.43221
WBGene00007154	dhc-3	Dynein Heavy Chain(dhc-3)	40.3145	30.3309	31.2432	34.2419	9.52294	12.3893	18.2065	12.2949	0.000311827	-1.37503	6.4346e-05	0.385544	3.50609
WBGene00013852	hhat-1	Homolog of Hedgehog AcylTransferase(hhat-1)	54.1063	52.8345	52.4079	62.258	19.9982	25.7317	20.123	19.467	1.40002e-06	-1.37523	1.76843e-07	0.385491	5.85387
WBGene00003704	nhr-114	Nuclear Hormone Receptor family(nhr-114)	1003.62	1088.98	1111.65	905.853	365.681	411.707	358.381	449.789	1.80382e-46	-1.37538	2.15392e-48	0.385452	45.7438
WBGene00001623	glt-5	Amino acid transporter(glt-5)	223.852	215.252	187.459	234.505	80.945	82.9133	68.035	100.409	3.50427e-18	-1.37554	1.41818e-19	0.385409	17.4554
WBGene00012648	Y39A1A.9	hypothetical protein(Y39A1A.9)	66.8372	62.6187	92.7217	52.9193	23.8073	24.7787	26.8307	30.7373	1.13322e-06	-1.37633	1.41439e-07	0.385198	5.94569
WBGene00012634	Y38H6C.23	hypothetical protein(Y38H6C.23)	168.684	279.827	221.726	196.113	71.422	102.927	101.573	57.3763	1.66205e-10	-1.37712	1.26909e-11	0.384988	9.77936
WBGene00015592	C08D8.1	hypothetical protein(C08D8.1)	54.1063	37.1798	42.3295	48.7687	14.2844	17.1545	15.3318	23.5653	3.29748e-05	-1.37732	5.35239e-06	0.384933	4.48182
WBGene00016434	C35B1.4	hypothetical protein(C35B1.4)	1122.44	1160.4	1146.93	1046.97	392.345	450.782	435.999	444.666	6.53075e-77	-1.37741	3.62515e-79	0.384908	76.185
WBGene00010274	F58G6.3	hypothetical protein(F58G6.3)	24.4009	40.1151	35.2746	34.2419	14.2844	12.3893	6.70767	18.4424	0.000774812	-1.37784	0.000177687	0.384794	3.1108
WBGene00015434	C04E12.4	hypothetical protein(C04E12.4)	198.39	241.669	188.467	172.247	68.5652	88.6315	65.1602	86.0645	1.94076e-15	-1.37851	9.29481e-17	0.384617	14.712
WBGene00011166	chil-22	CHItinase-Like(chil-22)	227.034	203.511	188.467	218.941	67.6129	92.4436	70.9097	91.1874	3.06022e-18	-1.38004	1.22541e-19	0.384209	17.5142
WBGene00021852	Y54F10AM.8	Putative phospholipase B-like 3(Y54F10AM.8)	3614.52	3490.01	3428.69	3510.31	1282.74	1453.37	1320.45	1327.85	9.29109e-151	-1.38288	1.13942e-153	0.383454	150.032
WBGene00020594	ugt-10	UDP-GlucuronosylTransferase(ugt-10)	155.954	237.755	165.287	167.059	70.4698	64.8058	58.4526	85.0399	1.23988e-12	-1.38438	7.60271e-14	0.383055	11.9066
WBGene00010514	K02E11.5	hypothetical protein(K02E11.5)	118.822	125.237	124.973	102.726	44.7578	44.7922	47.9119	43.0322	7.44442e-13	-1.38612	4.47347e-14	0.382594	12.1282
WBGene00004023	pho-4	intestinal acid PHOsphatase(pho-4)	668.372	761.208	816.354	694.176	318.066	288.767	264.474	252.046	1.07676e-42	-1.38756	1.41779e-44	0.382211	41.9679
WBGene00010789	sulp-5	SULfate Permease family(sulp-5)	81.69	75.3381	81.6354	63.2956	34.2826	28.5908	28.7472	23.5653	2.72398e-08	-1.38785	2.67598e-09	0.382133	7.5648
WBGene00022333	fbxa-27	F-box A protein(fbxa-27)	20.1573	40.1151	37.2903	34.2419	11.4275	15.2484	12.4571	11.2703	0.000578543	-1.38811	0.000127897	0.382064	3.23766
WBGene00013450	oac-56	O-ACyltransferase homolog(oac-56)	33.9491	46.964	38.2981	56.0322	9.52294	23.8257	18.2065	15.3687	0.000163746	-1.38844	3.12631e-05	0.381979	3.78583
WBGene00017537	F17A9.5	hypothetical protein(F17A9.5)	230.217	210.36	228.781	238.656	88.5633	81.9603	90.0745	86.0645	7.04752e-24	-1.3886	1.9833e-25	0.381935	23.152
WBGene00015783	C15B12.1	Putative sarcosine oxidase(C15B12.1)	358.587	416.806	379.958	361.096	126.655	137.236	160.026	155.736	1.12329e-31	-1.38907	2.16783e-33	0.381812	30.9495
WBGene00018280	F41C6.7	hypothetical protein(F41C6.7)	102.908	127.194	115.902	144.231	39.0441	56.2286	50.7867	40.9831	2.81674e-11	-1.38908	1.97261e-12	0.381807	10.5503
WBGene00044331	clec-25	C-type LECtin(clec-25)	47.7409	71.4244	50.3922	36.3171	24.7596	17.1545	17.2483	19.467	3.33902e-05	-1.39061	5.43321e-06	0.381404	4.47638
WBGene00003845	odd-1	Protein odd-skipped-related 1(odd-1)	14.8527	28.3741	14.1098	23.8656	9.52294	8.57724	8.62415	4.09831	0.00886527	-1.39357	0.00286436	0.380622	2.05231
WBGene00001699	grd-10	GRounDhog (hedgehog-like family)(grd-10)	79.5681	90.9928	104.816	84.0483	32.378	37.168	38.3296	28.6882	1.18739e-09	-1.39495	9.93258e-11	0.380257	8.92541
WBGene00012747	Y40H7A.10	hypothetical protein(Y40H7A.10)	1928.73	1891.28	1861.49	1995.37	688.509	790.059	672.684	766.384	6.6165e-98	-1.39598	2.30615e-100	0.379988	97.1794
WBGene00202501	Y57E12B.10	hypothetical protein(Y57E12B.10)	22.2791	22.5036	19.1491	22.8279	7.61835	14.2954	4.79119	6.14746	0.00531131	-1.39694	0.00158375	0.379734	2.2748
WBGene00012588	lips-16	pseudo	50.9236	47.9424	41.3216	57.0698	14.2844	21.9196	18.2065	20.4915	7.36386e-06	-1.39752	1.0585e-06	0.37958	5.13289
WBGene00001591	glc-1	Glutamate-gated chloride channel alpha(glc-1)	1541.5	1707.34	1676.05	1646.72	658.035	574.675	560.57	701.835	3.56633e-70	-1.39809	2.25586e-72	0.379432	69.4478
WBGene00010706	cyp-14A2	CYtochrome P450 family(cyp-14A2)	70.02	68.4892	46.3609	62.258	19.0459	20.9666	22.0395	31.7619	1.87085e-06	-1.40157	2.42355e-07	0.378517	5.72796
WBGene00020699	T22F3.10	hypothetical protein(T22F3.10)	62.5936	45.0072	72.5648	58.1074	27.6165	25.7317	19.1648	17.4178	3.06462e-06	-1.4017	4.09459e-07	0.378483	5.51362
WBGene00010513	K02E11.4	hypothetical protein(K02E11.4)	56.2281	69.4676	54.4236	45.6558	25.7119	16.2015	22.0395	21.5161	2.77197e-06	-1.40289	3.67496e-07	0.378172	5.55721
WBGene00009778	F46C5.1	hypothetical protein(F46C5.1)	206.877	257.324	230.796	195.075	89.5156	71.477	62.2855	113.728	6.16337e-14	-1.40481	3.34676e-15	0.377668	13.2102
WBGene00044212	Y68A4A.13	hypothetical protein(Y68A4A.13)	670.494	635.971	624.864	587.3	226.646	228.726	259.683	234.628	1.57325e-53	-1.40697	1.5435e-55	0.377103	52.8032
WBGene00011495	T05F1.11	hypothetical protein(T05F1.11)	102.908	143.827	173.349	135.93	50.4716	52.4165	56.5361	50.2043	8.94608e-12	-1.40816	5.93018e-13	0.376792	11.0484
WBGene00013762	Y113G7B.12	hypothetical protein(Y113G7B.12)	147.466	170.245	190.483	196.113	57.1376	82.9133	53.6614	71.7204	2.68149e-14	-1.40895	1.41058e-15	0.376585	13.5716
WBGene00004052	parg-2	Poly(ADP-ribose) glycohydrolase 2(parg-2)	29.7054	34.2446	27.2118	24.9032	10.4752	6.67119	15.3318	11.2703	0.000794851	-1.40944	0.000182636	0.376457	3.09971
WBGene00008352	fbxa-6	F-box A protein(fbxa-6)	102.908	121.324	110.863	96.4998	36.1872	49.5574	31.6219	45.0814	6.76349e-11	-1.41189	4.96359e-12	0.375819	10.1698
WBGene00019751	M03D4.4	hypothetical protein(M03D4.4)	40.3145	53.8129	54.4236	34.2419	22.8551	18.1075	15.3318	12.2949	4.68124e-05	-1.41221	7.91033e-06	0.375735	4.32964
WBGene00006927	vit-3	Vitellogenin-3(vit-3)	36854.9	24585.7	25069.1	38389.3	9031.56	11206.6	11507.5	15013.1	7.14736e-09	-1.41746	6.53241e-10	0.374371	8.14585
WBGene00015050	clec-51	C-type LECtin(clec-51)	451.947	524.432	485.781	478.349	166.651	192.511	155.235	210.038	3.1483e-36	-1.42356	4.89731e-38	0.372791	35.5019
WBGene00021463	zeel-1	hypothetical protein(zeel-1)	20.1573	16.6331	28.2197	21.7903	7.61835	5.71816	4.79119	14.3441	0.00592786	-1.42795	0.00180059	0.371659	2.2271
WBGene00050914	T12B5.15	hypothetical protein(T12B5.15)	43.4972	67.5108	60.4707	48.7687	16.189	22.8726	22.9977	19.467	2.78326e-06	-1.43557	3.69173e-07	0.3697	5.55545
WBGene00008829	cyp-35D1	CYtochrome P450 family(cyp-35D1)	108.213	66.5324	69.5413	117.253	37.1395	29.5438	22.9977	44.0568	8.63499e-07	-1.43581	1.05339e-07	0.36964	6.06374
WBGene00012748	Y40H7A.11	hypothetical protein(Y40H7A.11)	44.5582	51.8561	65.5099	45.6558	20.9505	15.2484	21.0813	19.467	3.62739e-06	-1.43699	4.90504e-07	0.369337	5.44041
WBGene00011180	R09H10.2	hypothetical protein(R09H10.2)	18.0354	18.5899	21.1647	23.8656	8.57065	8.57724	4.79119	8.19662	0.00353028	-1.43877	0.000989608	0.368881	2.45219
WBGene00018992	trpl-1	pseudo	47.7409	62.6187	38.2981	56.0322	20.9505	23.8257	19.1648	11.2703	1.57729e-05	-1.44003	2.42199e-06	0.368561	4.80209
WBGene00010422	H32K16.2	hypothetical protein(H32K16.2)	267.349	318.964	295.299	243.844	136.178	108.645	102.532	66.5975	3.08106e-15	-1.44072	1.50145e-16	0.368382	14.5113
WBGene00019272	H42K12.3	hypothetical protein(H42K12.3)	170.806	196.662	119.934	158.758	57.1376	91.4905	46.9537	42.0077	6.87653e-09	-1.44129	6.25825e-10	0.368237	8.16263
WBGene00009094	F23H12.5	hypothetical protein(F23H12.5)	81.69	95.8849	72.5648	79.8977	30.4734	33.3559	22.9977	34.8356	3.17541e-09	-1.44219	2.78742e-10	0.368008	8.4982
WBGene00008709	F11E6.6	hypothetical protein(F11E6.6)	49.8627	77.2949	63.4942	46.6935	20.9505	20.0136	23.956	22.5407	1.44581e-06	-1.4432	1.8356e-07	0.367751	5.83989
WBGene00016027	C23H5.8	hypothetical protein(C23H5.8)	907.077	969.611	870.778	1116.49	286.64	328.794	346.882	457.986	1.84021e-29	-1.44518	3.87212e-31	0.367246	28.7351
WBGene00011800	T16G1.6	hypothetical protein(T16G1.6)	1246.57	1297.38	1215.46	1259.69	424.723	431.721	477.203	509.215	2.56876e-85	-1.44661	1.19377e-87	0.366884	84.5903
WBGene00019619	asp-14	ASpartyl Protease(asp-14)	1616.82	1512.63	1626.66	1586.54	534.237	555.614	643.937	588.107	1.05933e-94	-1.44984	3.89736e-97	0.366062	93.975
WBGene00009663	hda-5	Histone DeAcetylase(hda-5)	547.429	545.957	504.93	558.246	202.839	183.934	183.024	220.284	4.36567e-49	-1.44987	5.04392e-51	0.366053	48.3599
WBGene00017536	F17A9.4	hypothetical protein(F17A9.4)	461.495	615.424	569.432	444.107	190.459	205.854	211.771	154.711	2.33764e-26	-1.45386	5.79392e-28	0.365043	25.6312
WBGene00020626	T20F5.4	hypothetical protein(T20F5.4)	80.629	80.2302	76.5962	53.9569	27.6165	18.1075	27.7889	32.7865	1.37379e-07	-1.45843	1.47993e-08	0.363888	6.86208
WBGene00001772	gst-24	Glutathione S-Transferase(gst-24)	60.4718	61.6403	45.353	45.6558	21.9028	22.8726	20.123	12.2949	3.66143e-06	-1.46043	4.96289e-07	0.363385	5.43635
WBGene00011891	del-6	DEgenerin Like(del-6)	1861.89	2031.19	2039.88	1886.42	743.742	730.971	642.978	721.302	6.44491e-107	-1.46198	1.78875e-109	0.362995	106.191
WBGene00000695	col-121	COLlagen(col-121)	37.1318	57.7266	51.4001	48.7687	17.1413	14.2954	22.9977	16.3932	6.79305e-06	-1.46252	9.70311e-07	0.36286	5.16793
WBGene00000596	col-7	Cuticle collagen 7(col-7)	263.105	322.878	229.789	296.763	106.657	72.43	136.07	88.1136	3.42617e-15	-1.46353	1.67184e-16	0.362604	14.4652
WBGene00008152	C47E12.9	hypothetical protein(C47E12.9)	77.4463	77.2949	48.3766	53.9569	23.8073	25.7317	24.9142	18.4424	7.06345e-07	-1.46593	8.47997e-08	0.362002	6.15098
WBGene00002051	ifa-3	Intermediate filament protein ifa-3(ifa-3)	36.0709	35.223	49.3844	47.7311	25.7119	11.4363	14.3736	9.22119	0.000150705	-1.46619	2.85399e-05	0.361938	3.82187
WBGene00017968	skpo-3	ShK domain and PerOxidase domain containing protein(skpo-3)	1162.76	1258.24	1168.09	1272.14	468.529	424.097	461.871	403.683	1.08597e-85	-1.4666	4.97667e-88	0.361835	84.9642
WBGene00008043	C40H1.8	hypothetical protein(C40H1.8)	202.634	182.964	179.396	189.887	46.6624	63.8528	70.9097	92.2119	3.84964e-15	-1.4674	1.88593e-16	0.361633	14.4146
WBGene00018844	F54H12.4	hypothetical protein(F54H12.4)	46.68	48.9208	44.3452	43.5806	19.9982	8.57724	17.2483	20.4915	1.33819e-05	-1.47213	2.02115e-06	0.360449	4.87348
WBGene00016628	slc-36.5	SLC (SoLute Carrier) homolog(slc-36.5)	99.7254	186.878	140.09	135.93	47.6147	51.4634	53.6614	50.2043	2.40308e-11	-1.4729	1.66276e-12	0.360258	10.6192
WBGene00016064	acd-1	hypothetical protein(acd-1)	42.4363	48.9208	51.4001	61.2203	23.8073	17.1545	22.9977	9.22119	1.36102e-05	-1.47296	2.05875e-06	0.360243	4.86613
WBGene00018568	F47E1.4	Solute carrier organic anion transporter family member(F47E1.4)	549.551	552.806	514.001	560.322	199.029	199.183	183.982	201.842	2.38288e-56	-1.47338	2.18401e-58	0.360138	55.6229
WBGene00001070	dpy-8	DumPY: shorter than wild-type(dpy-8)	109.274	99.7985	83.6511	106.876	33.3303	47.6513	26.8307	35.8602	2.63517e-10	-1.47485	2.04615e-11	0.359772	9.57919
WBGene00003691	nhr-101	Nuclear Hormone Receptor family(nhr-101)	534.698	651.626	580.519	490.8	203.791	206.807	183.024	219.26	1.15478e-38	-1.47508	1.67705e-40	0.359714	37.9375
WBGene00011364	T02B5.3	Carboxylic ester hydrolase(T02B5.3)	1057.73	1055.71	1059.25	1170.45	363.776	422.191	370.838	404.708	7.04504e-80	-1.47601	3.68326e-82	0.359481	79.1521
WBGene00006928	vit-4	Vitellogenin-4(vit-4)	6487.46	4216	4061.62	7732.44	1325.59	1956.56	1948.1	2842.18	2.39888e-05	-1.47872	3.78111e-06	0.358806	4.61999
WBGene00013334	nlp-56	hypothetical protein(Y57G11C.45)	182.476	201.554	210.64	210.639	90.4679	72.43	74.7426	50.2043	1.26921e-17	-1.48108	5.26755e-19	0.35822	16.8965
WBGene00019520	K08B12.1	hypothetical protein(K08B12.1)	48.8018	63.5971	50.3922	60.1827	11.4275	27.6378	16.2901	24.5899	4.92595e-06	-1.48335	6.8295e-07	0.357658	5.30751
WBGene00006930	vit-6	Vitellogenin-6(vit-6)	865909	700131	758473	760307	227793	275962	273315	325204	1.86225e-59	-1.48471	1.56259e-61	0.357321	58.73
WBGene00020004	R11E3.2	hypothetical protein(R11E3.2)	38.1927	29.3525	41.3216	38.3924	7.61835	13.3424	17.2483	14.3441	8.51266e-05	-1.48719	1.52583e-05	0.356706	4.06993
WBGene00015598	fbxa-163	F-box A protein(fbxa-163)	649.276	742.619	696.421	742.945	265.69	266.847	221.353	256.144	3.51723e-57	-1.48741	3.11018e-59	0.356652	56.4538
WBGene00003729	nhx-1	Sodium/hydrogen exchanger(nhx-1)	58.35	70.446	85.6668	67.4461	31.4257	23.8257	31.6219	13.3195	5.57854e-07	-1.48797	6.60726e-08	0.356515	6.25348
WBGene00020194	T03G6.1	hypothetical protein(T03G6.1)	49.8627	65.5539	59.4629	51.8816	17.1413	17.1545	20.123	26.639	4.94553e-07	-1.49017	5.79687e-08	0.35597	6.30579
WBGene00018621	F48G7.10	hypothetical protein(F48G7.10)	125.187	111.54	136.059	103.763	53.3285	31.4499	51.7449	32.7865	5.00824e-11	-1.49043	3.60433e-12	0.355906	10.3003
WBGene00001069	dpy-7	Cuticle collagen dpy-7(dpy-7)	91.2381	85.1223	96.7531	73.6719	31.4257	39.0741	23.956	28.6882	7.18712e-10	-1.49265	5.85435e-11	0.355359	9.14344
WBGene00044150	VB0395L.1	hypothetical protein(VB0395L.1)	26.5227	41.0935	53.4158	50.844	16.189	20.0136	13.4153	11.2703	6.63951e-05	-1.49496	1.16559e-05	0.35479	4.17786
WBGene00016943	acdh-1	Acyl CoA DeHydrogenase(acdh-1)	12112.4	15018.7	12511.4	13596.1	3864.41	4543.08	4650.33	5809.35	2.01805e-24	-1.49667	5.52283e-26	0.35437	23.6951
WBGene00000684	col-110	COLlagen(col-110)	41.3754	25.4388	32.251	35.2795	10.4752	13.3424	14.3736	9.22119	0.00013487	-1.49728	2.52103e-05	0.35422	3.87009
WBGene00011829	T19A6.4	hypothetical protein(T19A6.4)	26.5227	44.0288	36.2824	30.0914	9.52294	10.4833	17.2483	11.2703	0.000173452	-1.4986	3.33962e-05	0.353897	3.76082
WBGene00020688	T22D1.11	hypothetical protein(T22D1.11)	51.9845	35.223	37.2903	40.4677	12.3798	10.4833	21.0813	14.3441	3.68107e-05	-1.49934	6.04681e-06	0.353716	4.43403
WBGene00019214	H20E11.2	hypothetical protein(H20E11.2)	33.9491	40.1151	32.251	52.9193	16.189	14.2954	12.4571	13.3195	3.38755e-05	-1.49985	5.51873e-06	0.353591	4.47011
WBGene00008554	F07C6.3	hypothetical protein(F07C6.3)	42.4363	52.8345	48.3766	37.3548	16.189	18.1075	14.3736	15.3687	4.37795e-06	-1.49986	6.02452e-07	0.353588	5.35873
WBGene00020157	T02B11.6	hypothetical protein(T02B11.6)	20.1573	31.3093	23.1804	23.8656	9.52294	9.53027	10.5406	5.12289	0.0011158	-1.50103	0.00026824	0.353302	2.95242
WBGene00044211	Y60A3A.25	hypothetical protein(Y60A3A.25)	37.1318	32.2878	35.2746	33.2042	6.66606	10.4833	16.2901	15.3687	0.000121918	-1.50202	2.25375e-05	0.353058	3.91393
WBGene00008680	F11A5.15	hypothetical protein(F11A5.15)	89.1163	83.1654	77.6041	69.5214	26.6642	27.6378	26.8307	31.7619	4.37657e-10	-1.50212	3.46329e-11	0.353033	9.35887
WBGene00000928	dao-2	Dauer or Aging adult Overexpression(dao-2)	273.714	408	352.746	246.957	107.609	121.987	90.0745	133.195	1.10605e-16	-1.50271	4.87596e-18	0.35289	15.9562
WBGene00000722	col-149	COLlagen(col-149)	95.4818	77.2949	85.6668	94.4246	32.378	22.8726	36.4131	32.7865	2.11564e-10	-1.50341	1.62636e-11	0.35272	9.67456
WBGene00023039	F41B5.11	pseudo	48.8018	61.6403	49.3844	52.9193	13.3321	21.9196	12.4571	27.6636	4.57849e-06	-1.50371	6.3123e-07	0.352645	5.33928
WBGene00021171	Y8A9A.2	hypothetical protein(Y8A9A.2)	63.6545	75.3381	117.918	72.6343	30.4734	32.4029	30.6636	22.5407	8.78356e-08	-1.50386	9.26376e-09	0.352609	7.05633
WBGene00001064	dpy-2	Cuticle collagen dpy-2(dpy-2)	76.3854	128.173	126.988	89.2364	49.5193	36.215	25.8725	36.8848	1.65804e-08	-1.50406	1.58601e-09	0.35256	7.78041
WBGene00004155	pqn-73	Prion-like-(Q/N-rich)-domain-bearing protein(pqn-73)	19.0964	42.0719	19.1491	30.0914	14.2844	3.81211	7.66591	13.3195	0.00368831	-1.50434	0.00103915	0.352492	2.43317
WBGene00013046	Y50E8A.1	hypothetical protein(Y50E8A.1)	274.775	438.331	347.707	300.914	107.609	158.202	107.323	106.556	3.72643e-17	-1.50536	1.59948e-18	0.352243	16.4287
WBGene00000372	cyp-13A7	Putative cytochrome P450 CYP13A7(cyp-13A7)	25.4618	45.0072	36.2824	24.9032	12.3798	20.0136	6.70767	7.17204	0.00105927	-1.50616	0.000252973	0.352047	2.97499
WBGene00019368	K03H6.2	hypothetical protein(K03H6.2)	624.875	602.705	602.691	673.424	232.36	186.793	192.606	270.488	5.78058e-39	-1.50648	8.28302e-41	0.35197	38.238
WBGene00077701	poml-3	PON (paraoxonase) and MEC-6 Like(poml-3)	122.004	130.129	133.036	133.855	47.6147	47.6513	39.2878	48.1551	3.88369e-16	-1.50717	1.77979e-17	0.351799	15.4108
WBGene00009926	noah-2	NOmpA Homolog (Drosophila nompA: no mechanoreceptor potential A)(noah-2)	302.359	317.007	327.55	312.327	120.941	109.598	75.7009	137.293	8.09252e-23	-1.50766	2.41318e-24	0.351681	22.0919
WBGene00006366	sym-1	hypothetical protein(sym-1)	308.724	335.597	369.879	299.876	139.987	87.6784	99.6568	135.244	3.47669e-22	-1.50811	1.07714e-23	0.351572	21.4588
WBGene00008359	nspc-17	Nematode Specific Peptide family, group C(nspc-17)	93.3599	161.439	131.02	111.027	39.9963	50.5104	38.3296	46.106	4.4059e-11	-1.50835	3.15662e-12	0.351513	10.356
WBGene00020329	bath-26	BTB and MATH domain containing(bath-26)	20.1573	32.2878	21.1647	17.6398	6.66606	4.76513	10.5406	10.2458	0.00251323	-1.50874	0.000670443	0.351417	2.59977
WBGene00009236	F28H7.2	hypothetical protein(F28H7.2)	14.8527	28.3741	22.1726	22.8279	8.57065	11.4363	4.79119	6.14746	0.00285401	-1.51081	0.000774983	0.350914	2.54454
WBGene00009334	F32D8.12	hypothetical protein(F32D8.12)	1467.24	1857.04	1731.48	1536.73	590.422	602.313	550.029	568.64	8.5955e-73	-1.51235	5.10415e-75	0.35054	72.0657
WBGene00008511	F01G10.9	hypothetical protein(F01G10.9)	88.0554	104.691	78.6119	100.65	25.7119	36.215	33.5384	34.8356	6.38901e-11	-1.51496	4.68052e-12	0.349907	10.1946
WBGene00001068	dpy-6	DumPY: shorter than wild-type(dpy-6)	48.8018	62.6187	83.6511	41.5053	18.0936	15.2484	23.956	25.6144	5.91336e-06	-1.51712	8.32444e-07	0.349382	5.22817
WBGene00011175	R09E10.5	hypothetical protein(R09E10.5)	37.1318	52.8345	61.4785	37.3548	19.0459	16.2015	13.4153	17.4178	9.20859e-06	-1.51719	1.34922e-06	0.349367	5.03581
WBGene00015139	B0310.3	hypothetical protein(B0310.3)	136.857	183.942	173.349	149.419	61.8991	72.43	45.9955	44.0568	3.48814e-14	-1.51866	1.85223e-15	0.349009	13.4574
WBGene00007677	C18D4.8	pseudo	316.151	304.288	321.503	319.591	123.798	93.3966	89.1162	134.22	3.52382e-27	-1.52001	8.39277e-29	0.348683	26.453
WBGene00044332	clec-36	C-type LECtin(clec-36)	159.136	149.698	139.083	177.435	57.1376	57.1816	52.7031	50.2043	3.20978e-18	-1.52369	1.29278e-19	0.347796	17.4935
WBGene00009400	F35C5.12	hypothetical protein(F35C5.12)	111.395	111.54	96.7531	102.726	36.1872	53.3695	26.8307	29.7127	1.19007e-10	-1.52914	8.94873e-12	0.346483	9.92443
WBGene00006670	twk-16	TWiK family of potassium channels(twk-16)	13.7918	17.6115	19.1491	11.414	3.80918	3.81211	6.70767	7.17204	0.00944232	-1.53446	0.00308263	0.345208	2.02492
WBGene00012540	Y37A1B.7	hypothetical protein(Y37A1B.7)	23.34	24.4604	13.102	17.6398	8.57065	8.57724	5.74943	4.09831	0.0040829	-1.53497	0.00116797	0.345088	2.38903
WBGene00008042	C40H1.7	hypothetical protein(C40H1.7)	93.3599	167.309	120.941	89.2364	32.378	35.262	28.7472	66.5975	3.83389e-07	-1.53654	4.43209e-08	0.34471	6.41636
WBGene00003658	nhr-68	Nuclear Hormone Receptor family(nhr-68)	2008.3	2558.56	2275.71	2262.04	711.364	855.818	716.763	848.35	2.03492e-68	-1.53995	1.36599e-70	0.343898	67.6915
WBGene00016517	nhr-260	Nuclear Hormone Receptor family(nhr-260)	32.8882	20.5468	15.1177	24.9032	8.57065	6.67119	9.58239	7.17204	0.00166382	-1.54223	0.000421513	0.343355	2.77889
WBGene00014821	R10E8.7	pseudo	525.15	668.259	606.723	560.322	223.789	167.733	186.857	232.579	6.08348e-37	-1.54312	9.14897e-39	0.343143	36.2158
WBGene00002013	hsp-12.6	Heat Shock Protein(hsp-12.6)	41.3754	45.0072	57.4472	45.6558	10.4752	18.1075	22.9977	13.3195	6.37329e-06	-1.54446	9.06239e-07	0.342824	5.19564
WBGene00011622	T08G5.1	hypothetical protein(T08G5.1)	28.6445	31.3093	21.1647	32.1666	10.4752	8.57724	13.4153	6.14746	0.000374879	-1.5477	7.90604e-05	0.342055	3.42611
WBGene00010893	cutl-9	CUTiclin-Like(cutl-9)	20.1573	15.6547	22.1726	21.7903	10.4752	4.76513	4.79119	7.17204	0.00286226	-1.55142	0.000777594	0.341175	2.54329
WBGene00004224	ptr-10	PaTched Related family(ptr-10)	20.1573	31.3093	28.2197	14.5269	10.4752	6.67119	9.58239	5.12289	0.00189024	-1.56272	0.000488147	0.338513	2.72348
WBGene00012085	T27D12.1	hypothetical protein(T27D12.1)	1429.04	2024.34	2100.35	1778.5	647.56	696.662	611.356	525.608	5.06259e-41	-1.56299	6.89477e-43	0.338449	40.2956
WBGene00014838	cyp-13A9	pseudo	22.2791	24.4604	21.1647	15.5645	5.71376	7.62421	5.74943	9.22119	0.00171919	-1.56552	0.000438414	0.337856	2.76468
WBGene00022245	acp-6	ACid Phosphatase family(acp-6)	2298.99	2590.85	2306.96	2515.22	760.883	786.247	832.71	897.53	7.20724e-113	-1.56799	1.6747e-115	0.337279	112.142
WBGene00022816	fbn-1	FiBrilliN homolog(fbn-1)	136.857	198.619	175.365	158.758	68.5652	51.4634	68.9932	35.8602	2.58199e-13	-1.57174	1.48823e-14	0.336403	12.588
WBGene00011486	T05E12.3	hypothetical protein(T05E12.3)	2005.12	2242.53	2178.96	2196.67	767.549	631.857	685.141	816.588	2.95151e-87	-1.57243	1.29544e-89	0.336242	86.53
WBGene00011801	T16G1.7	hypothetical protein(T16G1.7)	1064.09	1205.41	1063.28	1041.78	437.103	324.029	331.551	378.069	1.35107e-57	-1.57296	1.17727e-59	0.336119	56.8693
WBGene00001691	grd-2	GRounDhog (hedgehog-like family)(grd-2)	29.7054	16.6331	14.1098	14.5269	7.61835	4.76513	9.58239	3.07373	0.00686998	-1.57331	0.00213705	0.336037	2.16304
WBGene00009047	F22B8.4	pseudo	171.867	188.834	183.428	202.338	55.233	65.7588	58.4526	71.7204	1.55764e-22	-1.57363	4.7454e-24	0.335961	21.8075
WBGene00018286	F41E6.5	hypothetical protein(F41E6.5)	1221.11	1189.76	1089.48	1310.53	437.103	368.821	370.838	432.372	6.40293e-74	-1.58038	3.76084e-76	0.334393	73.1936
WBGene00008038	C40H1.2	hypothetical protein(C40H1.2)	197.329	199.597	181.412	206.489	71.422	61.9467	65.1602	63.5238	4.18548e-25	-1.58189	1.10492e-26	0.334044	24.3783
WBGene00012545	Y37D8A.3	hypothetical protein(Y37D8A.3)	289.628	280.806	292.275	285.349	86.6587	93.3966	86.2415	117.826	4.81142e-32	-1.58243	9.06818e-34	0.33392	31.3177
WBGene00018384	F43C11.7	hypothetical protein(F43C11.7)	5244.07	5486.96	5464.54	5420.59	1718.89	1961.33	1755.49	1773.54	3.40138e-207	-1.58415	2.63451e-210	0.333521	206.468
WBGene00000663	col-88	COLlagen(col-88)	184.598	251.453	75.5884	160.833	63.8037	71.477	53.6614	34.8356	8.38282e-07	-1.58578	1.0183e-07	0.333145	6.07661
WBGene00017190	F07B7.12	hypothetical protein(F07B7.12)	25.4618	24.4604	41.3216	90.2741	25.7119	5.71816	13.4153	15.3687	0.00324555	-1.59118	0.000899738	0.331899	2.48871
WBGene00005726	srv-15	Serpentine Receptor, class V(srv-15)	19.0964	17.6115	10.0784	14.5269	4.76147	6.67119	5.74943	3.07373	0.00820256	-1.59134	0.00261912	0.331864	2.08605
WBGene00007964	cyp-25A2	CYtochrome P450 family(cyp-25A2)	62.5936	88.0575	62.4864	73.6719	20.9505	27.6378	24.9142	21.5161	3.07701e-09	-1.59387	2.69906e-10	0.331282	8.51187
WBGene00015359	C02G6.1	hypothetical protein(C02G6.1)	22.2791	42.0719	21.1647	25.9408	3.80918	12.3893	9.58239	11.2703	0.00105127	-1.59418	0.000250518	0.33121	2.97829
WBGene00001643	gly-18	GLYcosylation related(gly-18)	15.9136	12.7194	12.0941	20.7527	7.61835	4.76513	4.79119	3.07373	0.00823118	-1.59432	0.00263039	0.331179	2.08454
WBGene00003888	osm-8	Osmotic avoidance abnormal protein 8(osm-8)	37.1318	55.7698	18.1412	35.2795	7.61835	18.1075	12.4571	10.2458	0.000526961	-1.59472	0.000115406	0.331087	3.27822
WBGene00000118	alh-12	ALdehyde deHydrogenase(alh-12)	1442.84	1501.87	1415.01	1319.87	459.006	503.198	424.5	492.822	6.58896e-100	-1.59596	2.21149e-102	0.330802	99.1812
WBGene00008205	sams-1	Probable S-adenosylmethionine synthase 1(sams-1)	3174.24	3120.17	2775.6	2939.61	1022.76	830.086	881.58	1224.37	2.09875e-56	-1.60165	1.91005e-58	0.329501	55.678
WBGene00007181	B0462.1	pseudo	16.9745	34.2446	28.2197	32.1666	14.2844	8.57724	7.66591	6.14746	0.000601027	-1.60303	0.000133294	0.329185	3.22111
WBGene00000675	col-101	COLlagen(col-101)	1173.36	1210.3	1116.69	1192.24	378.061	440.298	350.715	374.995	3.71333e-90	-1.60333	1.53394e-92	0.329116	89.4302
WBGene00007661	pals-7	hypothetical protein(C17H1.8)	13.7918	24.4604	13.102	13.4892	7.61835	2.85908	5.74943	5.12289	0.00759003	-1.60516	0.0023961	0.3287	2.11976
WBGene00019105	asp-8	ASpartyl Protease(asp-8)	586.682	566.503	505.938	543.72	153.319	180.122	183.982	206.965	2.33068e-50	-1.60602	2.5273e-52	0.328504	49.6325
WBGene00015993	C18H7.1	hypothetical protein(C18H7.1)	60.4718	45.0072	41.3216	54.9945	15.2367	19.0605	12.4571	19.467	6.92452e-07	-1.60807	8.29083e-08	0.328037	6.15961
WBGene00009883	F49C12.14	hypothetical protein(F49C12.14)	143.223	168.288	170.326	158.758	47.6147	43.8392	52.7031	66.5975	9.0338e-19	-1.60817	3.47521e-20	0.328014	18.0441
WBGene00015889	C17C3.3	hypothetical protein(C17C3.3)	45.6191	79.2518	80.6276	73.6719	25.7119	35.262	21.0813	9.22119	6.0521e-06	-1.60829	8.5549e-07	0.327987	5.21809
WBGene00008960	F19H6.5	hypothetical protein(F19H6.5)	14.8527	16.6331	16.1255	14.5269	4.76147	6.67119	5.74943	3.07373	0.00541203	-1.61189	0.0016205	0.327169	2.26664
WBGene00000743	col-170	COLlagen(col-170)	43.4972	30.3309	14.1098	45.6558	18.0936	14.2954	1.91648	9.22119	0.00479146	-1.61452	0.00140994	0.326573	2.31953
WBGene00000469	ces-2	Cell death specification protein 2(ces-2)	46.68	77.2949	97.761	57.0698	28.5688	19.0605	25.8725	17.4178	5.82372e-07	-1.61594	6.91644e-08	0.326251	6.2348
WBGene00017881	asp-13	ASpartyl Protease(asp-13)	5657.82	4805.98	4488.94	5640.57	1512.24	1608.71	1665.42	1913.91	6.22564e-75	-1.62008	3.53615e-77	0.325318	74.2058
WBGene00018278	F41C6.4	hypothetical protein(F41C6.4)	16.9745	25.4388	25.1961	25.9408	4.76147	7.62421	3.83296	14.3441	0.00178558	-1.62662	0.000458353	0.323846	2.74822
WBGene00017560	F18C5.5	hypothetical protein(F18C5.5)	24.4009	33.2662	15.1177	25.9408	3.80918	14.2954	8.62415	5.12289	0.00215465	-1.62855	0.000564634	0.323413	2.66662
WBGene00012257	lpr-4	LiPocalin-Related protein(lpr-4)	115.639	126.216	121.949	89.2364	27.6165	40.9801	29.7054	48.1551	3.46129e-12	-1.63361	2.22963e-13	0.322281	11.4608
WBGene00011708	T11B7.5	hypothetical protein(T11B7.5)	81.69	96.8633	101.792	74.7096	35.2349	33.3559	25.8725	19.467	1.25119e-10	-1.63663	9.44062e-12	0.321607	9.90268
WBGene00020938	clec-218	C-type LECtin(clec-218)	2436.91	2099.68	2089.26	2229.87	640.894	631.857	711.972	862.694	1.55949e-67	-1.63769	1.0569e-69	0.321371	66.807
WBGene00000003	aat-2	Amino Acid Transporter(aat-2)	252.496	343.424	322.51	269.785	103.8	100.068	98.6986	78.8924	2.24498e-27	-1.63838	5.25998e-29	0.321218	26.6488
WBGene00022338	Y82E9BR.5	hypothetical protein(Y82E9BR.5)	134.735	145.784	146.138	108.951	44.7578	43.8392	47.9119	34.8356	2.4729e-16	-1.64258	1.11251e-17	0.320282	15.6068
WBGene00016450	clec-5	C-type LECtin(clec-5)	500.749	432.46	439.42	509.478	146.653	154.39	144.694	156.76	4.75711e-51	-1.64309	5.0049e-53	0.320169	50.3227
WBGene00012186	mlt-11	hypothetical protein(mlt-11)	325.699	433.439	321.503	289.5	119.037	117.222	89.1162	111.679	7.03591e-26	-1.64933	1.78929e-27	0.318787	25.1527
WBGene00045316	C49F5.9	pseudo	40.3145	47.9424	31.2432	36.3171	7.61835	18.1075	8.62415	15.3687	2.68387e-05	-1.65163	4.27189e-06	0.318281	4.57124
WBGene00008897	F16H6.7	hypothetical protein(F16H6.7)	46.68	75.3381	78.6119	36.3171	23.8073	22.8726	16.2901	12.2949	5.42309e-06	-1.6527	7.58525e-07	0.318044	5.26575
WBGene00012728	Y39G8B.9	hypothetical protein(Y39G8B.9)	1488.45	1780.72	1689.15	1578.24	593.279	505.104	490.618	488.723	4.04452e-87	-1.6534	1.80128e-89	0.317891	86.3931
WBGene00016547	C40A11.4	hypothetical protein(C40A11.4)	16.9745	15.6547	19.1491	15.5645	8.57065	3.81211	3.83296	5.12289	0.0035963	-1.65697	0.0010102	0.317104	2.44414
WBGene00020609	T20D4.3	hypothetical protein(T20D4.3)	49.8627	44.0288	42.3295	50.844	12.3798	13.3424	18.2065	15.3687	3.40205e-07	-1.65745	3.89546e-08	0.317	6.46826
WBGene00009838	fbxa-187	pseudo	18.0354	18.5899	18.1412	15.5645	3.80918	6.67119	7.66591	4.09831	0.0025836	-1.65752	0.000691885	0.316983	2.58777
WBGene00016023	prmt-6	PRotein arginine MethylTransferase(prmt-6)	50.9236	73.3813	75.5884	76.7848	18.0936	15.2484	25.8725	28.6882	1.8645e-08	-1.65957	1.79073e-09	0.316534	7.72944
WBGene00015756	C14C6.2	hypothetical protein(C14C6.2)	792.499	725.007	733.711	729.456	261.881	212.525	184.94	284.832	1.00718e-45	-1.65982	1.22866e-47	0.316478	44.9969
WBGene00004139	pqn-54	Prion-like-(Q/N-rich)-domain-bearing protein(pqn-54)	24.4009	34.2446	17.1334	18.6774	9.52294	12.3893	5.74943	2.04915	0.00262883	-1.66093	0.000705694	0.316236	2.58024
WBGene00015196	B0454.5	hypothetical protein(B0454.5)	88.0554	91.9712	75.5884	73.6719	31.4257	25.7317	19.1648	27.6636	3.49554e-11	-1.66388	2.47506e-12	0.315588	10.4565
WBGene00015045	cyp-34A10	CYtochrome P450 family(cyp-34A10)	239.765	144.806	158.232	235.543	63.8037	71.477	57.4943	52.2534	3.80137e-15	-1.66462	1.85983e-16	0.315428	14.4201
WBGene00012256	lpr-5	LiPocalin-Related protein(lpr-5)	134.735	183.942	176.373	132.817	66.6606	43.8392	35.4548	51.2289	1.87845e-14	-1.6722	9.736e-16	0.313775	13.7262
WBGene00020559	best-17	Bestrophin homolog 17(best-17)	111.395	164.374	103.808	114.14	48.567	36.215	42.1625	27.6636	2.84552e-12	-1.67313	1.81277e-13	0.313573	11.5458
WBGene00017092	E02C12.6	hypothetical protein(E02C12.6)	16.9745	13.6978	17.1334	20.7527	6.66606	2.85908	3.83296	8.19662	0.00364531	-1.67557	0.00102538	0.313042	2.43827
WBGene00001075	dpy-14	DumPY: shorter than wild-type(dpy-14)	486.957	531.28	601.683	388.075	166.651	143.907	174.399	143.441	2.4184e-32	-1.67582	4.51118e-34	0.312989	31.6165
WBGene00008435	glna-2	GLutamiNAse(glna-2)	618.51	580.201	573.464	533.343	181.888	179.169	161.942	196.719	1.92296e-63	-1.68056	1.46459e-65	0.311962	62.716
WBGene00016957	atic-1	5-Aminoimidazole-4-carboxamide ribonucleotide formylTransferase/IMP Cyclohydrolase homolog(atic-1)	966.488	1052.78	1101.57	996.127	314.257	343.09	295.138	328.889	7.66601e-96	-1.68445	2.77091e-98	0.311121	95.1154
WBGene00013527	Y73F8A.22	hypothetical protein(Y73F8A.22)	13.7918	10.7626	15.1177	13.4892	3.80918	5.71816	2.87472	4.09831	0.00825136	-1.68643	0.0026379	0.310696	2.08347
WBGene00009854	clec-31	C-type LECtin(clec-31)	66.8372	62.6187	65.5099	60.1827	17.1413	23.8257	20.123	17.4178	7.03848e-10	-1.69854	5.72873e-11	0.308098	9.15252
WBGene00007452	C08F11.3	hypothetical protein(C08F11.3)	39.2536	39.1367	34.2667	30.0914	12.3798	8.57724	8.62415	14.3441	8.96536e-06	-1.70508	1.31069e-06	0.306705	5.04743
WBGene00011853	clec-40	C-type LECtin(clec-40)	41.3754	55.7698	57.4472	54.9945	12.3798	17.1545	15.3318	19.467	6.39385e-08	-1.70835	6.64848e-09	0.306009	7.19424
WBGene00009226	cyp-37B1	CYtochrome P450 family(cyp-37B1)	197.329	219.165	230.796	199.225	82.8496	41.9332	58.4526	75.8187	1.09349e-19	-1.71042	3.95247e-21	0.305572	18.9612
WBGene00013480	egas-3	EGF plus ASC domain ion channel(egas-3)	198.39	210.36	219.71	211.677	60.9468	84.8194	42.1625	68.6467	5.34972e-21	-1.71195	1.7852e-22	0.305248	20.2717
WBGene00000966	dhs-2	DeHydrogenases, Short chain(dhs-2)	111.395	139.914	119.934	157.72	44.7578	40.0271	40.246	35.8602	5.99743e-17	-1.71597	2.62071e-18	0.304399	16.222
WBGene00000451	ceh-30	Homeobox protein ceh-30(ceh-30)	27.5836	17.6115	27.2118	36.3171	7.61835	10.4833	5.74943	9.22119	0.000227554	-1.71616	4.5311e-05	0.304358	3.64292
WBGene00013145	cutl-2	CUTiclin-Like(cutl-2)	15.9136	22.5036	32.251	21.7903	8.57065	8.57724	4.79119	6.14746	0.000631298	-1.71851	0.000141067	0.303863	3.19977
WBGene00017485	F15E6.4	hypothetical protein(F15E6.4)	74.2636	87.0791	64.5021	64.3332	22.8551	24.7787	28.7472	11.2703	4.88369e-09	-1.72175	4.35948e-10	0.303181	8.31125
WBGene00019154	glf-1	GaLactoFuranose synthesis (UGM, UDP-galactopyranose mutase)(glf-1)	51.9845	85.1223	61.4785	93.387	19.9982	25.7317	19.1648	23.5653	5.68916e-09	-1.72445	5.12256e-10	0.302613	8.24495
WBGene00010189	F57B1.6	hypothetical protein(F57B1.6)	36.0709	24.4604	26.204	22.8279	10.4752	2.85908	8.62415	11.2703	0.000297151	-1.72485	6.0953e-05	0.302531	3.52702
WBGene00013101	Y51H4A.5	hypothetical protein(Y51H4A.5)	115.639	136.978	107.839	140.08	38.0918	28.5908	27.7889	57.3763	9.04735e-13	-1.72664	5.4951e-14	0.302154	12.0435
WBGene00022415	Y102A11A.5	hypothetical protein(Y102A11A.5)	47.7409	46.964	29.2275	42.5429	13.3321	18.1075	13.4153	5.12289	1.36144e-05	-1.72789	2.06065e-06	0.301894	4.866
WBGene00020593	ugt-11	UDP-GlucuronosylTransferase(ugt-11)	62.5936	53.8129	60.4707	58.1074	17.1413	20.0136	16.2901	17.4178	1.64969e-09	-1.72843	1.40766e-10	0.301781	8.7826
WBGene00004157	pqn-75	Prion-like-(Q/N-rich)-domain-bearing protein(pqn-75)	53.0454	61.6403	53.4158	47.7311	15.2367	15.2484	14.3736	20.4915	1.64404e-08	-1.72848	1.5705e-09	0.301769	7.78409
WBGene00009773	lipl-2	Lipase(lipl-2)	1791.87	1537.09	1462.38	1598.99	525.666	436.486	436.957	524.583	9.4202e-84	-1.7323	4.43862e-86	0.300971	83.0259
WBGene00011450	ttr-22	TransThyretin-Related family domain(ttr-22)	9.54818	26.4173	23.1804	17.6398	5.71376	7.62421	8.62415	1.02458	0.00540982	-1.73341	0.00161949	0.30074	2.26682
WBGene00010705	cyp-14A1	CYtochrome P450 family(cyp-14A1)	10.6091	34.2446	28.2197	17.6398	5.71376	9.53027	7.66591	4.09831	0.0020128	-1.74711	0.000523954	0.297899	2.6962
WBGene00008707	F11E6.3	hypothetical protein(F11E6.3)	8371.63	7421.29	7124.46	7691.97	2204.56	2464.53	2387.93	2049.15	1.21125e-143	-1.74875	1.71997e-146	0.297559	142.917
WBGene00012669	Y39B6A.7	hypothetical protein(Y39B6A.7)	89.1163	62.6187	85.6668	78.8601	28.5688	20.9666	26.8307	17.4178	5.97827e-11	-1.74892	4.36032e-12	0.297524	10.2234
WBGene00020394	T10B5.8	hypothetical protein(T10B5.8)	32.8882	26.4173	21.1647	11.414	5.71376	7.62421	4.79119	9.22119	0.00111263	-1.75246	0.000267367	0.296796	2.95365
WBGene00008354	gcsh-1	Glycine Cleavage System H protein(gcsh-1)	29.7054	36.2014	35.2746	26.9785	7.61835	8.57724	6.70767	15.3687	3.22643e-05	-1.75369	5.21877e-06	0.296542	4.49128
WBGene00011508	T05H10.3	hypothetical protein(T05H10.3)	21.2182	14.6763	29.2275	26.9785	7.61835	3.81211	6.70767	9.22119	0.000627435	-1.75505	0.000139921	0.296262	3.20243
WBGene00015618	C08G5.6	hypothetical protein(C08G5.6)	15.9136	15.6547	21.1647	9.3387	4.76147	7.62421	3.83296	2.04915	0.0057913	-1.75748	0.00175425	0.295764	2.23722
WBGene00019605	ctsa-1	CaThepSin A homolog(ctsa-1)	152.771	152.633	123.965	135.93	34.2826	50.5104	39.2878	43.0322	2.57374e-19	-1.75851	9.6019e-21	0.295553	18.5894
WBGene00013508	Y71A12B.11	hypothetical protein(Y71A12B.11)	43.4972	39.1367	53.4158	38.3924	7.61835	13.3424	17.2483	13.3195	1.04662e-06	-1.76032	1.29772e-07	0.295184	5.98021
WBGene00016359	fbxb-88	F-box B protein(fbxb-88)	21.2182	28.3741	28.2197	26.9785	6.66606	12.3893	8.62415	3.07373	0.000233828	-1.76124	4.66962e-05	0.294994	3.6311
WBGene00012261	lpr-3	LiPocalin-Related protein(lpr-3)	214.304	275.914	242.891	163.946	81.8973	45.7453	48.8702	88.1136	1.82624e-14	-1.76424	9.43002e-16	0.294382	13.7384
WBGene00017945	F31D5.2	hypothetical protein(F31D5.2)	107.152	94.9064	121.949	119.328	27.6165	31.4499	31.6219	39.9585	8.00558e-16	-1.76553	3.75141e-17	0.294119	15.0966
WBGene00007758	C27A7.8	hypothetical protein(C27A7.8)	272.653	319.942	313.44	280.161	84.7542	74.3361	91.0327	99.384	2.24484e-37	-1.76561	3.33256e-39	0.294103	36.6488
WBGene00020578	T19D12.3	hypothetical protein(T19D12.3)	15.9136	23.482	19.1491	17.6398	6.66606	3.81211	6.70767	5.12289	0.000957218	-1.77288	0.000225385	0.292624	3.01899
WBGene00016528	C39B5.10	hypothetical protein(C39B5.10)	47.7409	38.1583	42.3295	44.6182	9.52294	17.1545	14.3736	9.22119	5.2775e-07	-1.77669	6.22686e-08	0.291853	6.27757
WBGene00018200	btb-17	BTB (Broad/complex/Tramtrack/Bric a brac) domain protein(btb-17)	221.73	256.345	253.977	253.182	78.0881	77.1952	59.4108	72.745	1.57531e-33	-1.77773	2.73517e-35	0.291641	32.8026
WBGene00017635	F20D6.5	hypothetical protein(F20D6.5)	98.6645	151.655	100.784	118.29	47.6147	38.1211	22.0395	28.6882	6.99491e-12	-1.78128	4.60518e-13	0.290925	11.1552
WBGene00007481	C09F9.4	pseudo	9.54818	26.4173	13.102	14.5269	4.76147	4.76513	3.83296	5.12289	0.00458655	-1.78849	0.00134047	0.289475	2.33851
WBGene00000111	alh-5	Aldehyde dehydrogenase(alh-5)	1108.65	992.115	1089.48	1059.42	292.354	335.465	317.177	282.783	2.32927e-108	-1.79015	6.16407e-111	0.289141	107.633
WBGene00008567	acox-1.4	Acyl-coenzyme A oxidase(F08A8.4)	186.72	196.662	200.561	177.435	48.567	53.3695	53.6614	64.5484	4.69437e-28	-1.79319	1.06353e-29	0.288533	27.3284
WBGene00007521	C11E4.7	hypothetical protein(C11E4.7)	59.4109	61.6403	57.4472	57.0698	12.3798	25.7317	14.3736	15.3687	5.50954e-09	-1.7943	4.93949e-10	0.288311	8.25888
WBGene00020577	T19D12.2	hypothetical protein(T19D12.2)	857.214	908.949	831.472	859.16	261.881	253.505	241.476	238.726	7.95413e-109	-1.79541	2.05361e-111	0.28809	108.099
WBGene00020054	R13D7.2	hypothetical protein(R13D7.2)	37.1318	48.9208	53.4158	48.7687	10.4752	18.1075	16.2901	9.22119	2.71853e-07	-1.7957	3.0742e-08	0.288031	6.56567
WBGene00021594	tig-3	TransformIng Growth factor beta family(tig-3)	244.009	232.863	236.844	266.672	68.5652	53.3695	77.6174	82.9907	5.44018e-31	-1.79701	1.0815e-32	0.28777	30.2644
WBGene00045208	F13E9.15	hypothetical protein(F13E9.15)	216.425	282.763	257	151.494	90.4679	74.3361	47.9119	48.1551	6.05929e-14	-1.79752	3.27349e-15	0.287668	13.2176
WBGene00001065	dpy-3	DumPY: shorter than wild-type(dpy-3)	56.2281	75.3381	72.5648	66.4085	30.4734	18.1075	6.70767	22.5407	2.11743e-07	-1.79944	2.34936e-08	0.287286	6.67419
WBGene00015798	C15H9.2	hypothetical protein(C15H9.2)	13.7918	12.7194	14.1098	16.6021	4.76147	2.85908	7.66591	1.02458	0.00654823	-1.79986	0.00202368	0.287203	2.18388
WBGene00007509	C10C5.5	Aminoacylase-1(C10C5.5)	145.344	187.856	164.279	172.247	67.6129	40.9801	49.8284	32.7865	6.62595e-18	-1.80545	2.72428e-19	0.286091	17.1788
WBGene00017658	F21C10.9	hypothetical protein(F21C10.9)	213.243	223.079	232.812	256.295	56.1853	61.9467	65.1602	80.9416	8.9581e-31	-1.81145	1.80399e-32	0.284905	30.0478
WBGene00003959	pcp-4	Prolyl Carboxy Peptidase like(pcp-4)	1600.91	1143.77	1163.05	1387.32	356.158	328.794	390.003	427.249	6.15709e-55	-1.81789	5.76246e-57	0.283635	54.2106
WBGene00007479	C09F9.2	hypothetical protein(C09F9.2)	74.2636	90.9928	84.659	51.8816	20.9505	21.9196	22.0395	20.4915	1.20246e-10	-1.8222	9.04969e-12	0.282789	9.91993
WBGene00010515	K02E11.6	hypothetical protein(K02E11.6)	23.34	22.5036	17.1334	16.6021	4.76147	4.76513	6.70767	6.14746	0.000509588	-1.83192	0.00011111	0.280891	3.29278
WBGene00002091	ins-8	INSulin related(ins-8)	146.405	163.396	154.2	158.758	48.567	40.9801	36.4131	49.1797	4.40216e-24	-1.83229	1.23032e-25	0.280818	23.3563
WBGene00009895	scl-2	SCP-Like extracellular protein(scl-2)	5328.94	6650.3	6490.52	6011.01	2004.58	1538.18	1464.19	1734.61	2.0404e-86	-1.8606	9.21887e-89	0.275362	85.6903
WBGene00019846	gpx-7	Glutathione peroxidase(gpx-7)	58.35	46.964	47.3687	45.6558	17.1413	11.4363	11.4989	14.3441	1.38432e-08	-1.86543	1.30989e-09	0.274442	7.85877
WBGene00010674	K08E7.6	hypothetical protein(K08E7.6)	15.9136	13.6978	18.1412	12.4516	6.66606	3.81211	2.87472	3.07373	0.00274511	-1.86923	0.000741337	0.27372	2.56144
WBGene00016013	C23G10.6	UDP-glucuronosyltransferase(C23G10.6)	32.8882	25.4388	24.1883	29.0537	8.57065	5.71816	3.83296	12.2949	5.57677e-05	-1.88248	9.57478e-06	0.271217	4.25362
WBGene00018264	cyp-33C6	CYtochrome P450 family(cyp-33C6)	32.8882	49.8993	34.2667	40.4677	8.57065	11.4363	12.4571	10.2458	6.20866e-07	-1.88421	7.39365e-08	0.270893	6.207
WBGene00022445	Y110A2AL.9	hypothetical protein(Y110A2AL.9)	24.4009	39.1367	48.3766	31.129	12.3798	9.53027	8.62415	8.19662	5.9458e-06	-1.88471	8.3919e-07	0.270798	5.22579
WBGene00003664	nhr-74	Nuclear Hormone Receptor family(nhr-74)	9.54818	14.6763	16.1255	13.4892	0	4.76513	6.70767	3.07373	0.00933788	-1.88846	0.00304613	0.270095	2.02975
WBGene00002200	kin-16	Receptor-like tyrosine-protein kinase kin-16(kin-16)	172.928	200.575	197.538	175.36	53.3285	63.8528	40.246	43.0322	6.36108e-26	-1.89514	1.61357e-27	0.268848	25.1965
WBGene00012255	lpr-6	LiPocalin-Related protein(lpr-6)	99.7254	117.41	105.824	92.3493	23.8073	19.0605	19.1648	50.2043	8.13702e-11	-1.89637	6.02411e-12	0.268618	10.0895
WBGene00003958	pcp-3	Prolyl Carboxy Peptidase like(pcp-3)	2754.12	2107.51	1988.48	2035.84	561.853	526.071	537.572	758.187	3.89977e-28	-1.89868	8.78474e-30	0.268189	27.409
WBGene00007693	C23H4.4	Carboxylic ester hydrolase(C23H4.4)	40.3145	77.2949	69.5413	58.1074	19.9982	19.0605	17.2483	9.22119	2.23686e-08	-1.90056	2.17435e-09	0.267839	7.65036
WBGene00016017	C23G10.11	hypothetical protein(C23G10.11)	12.7309	31.3093	23.1804	15.5645	4.76147	9.53027	7.66591	0	0.00365985	-1.90607	0.00103042	0.266819	2.43654
WBGene00012633	Y38H6C.21	hypothetical protein(Y38H6C.21)	13.7918	19.5683	22.1726	28.0161	4.76147	8.57724	4.79119	4.09831	0.000471121	-1.90664	0.000101869	0.266712	3.32687
WBGene00011671	cyp-13A4	Putative cytochrome P450 CYP13A4(cyp-13A4)	149.588	269.065	188.467	191.962	41.9009	50.5104	55.5779	65.5729	5.72897e-19	-1.90734	2.17429e-20	0.266583	18.2419
WBGene00015879	C17B7.5	hypothetical protein(C17B7.5)	59.4109	50.8777	60.4707	60.1827	7.61835	19.0605	12.4571	22.5407	9.1425e-09	-1.91062	8.49161e-10	0.265977	8.03894
WBGene00015258	B0554.5	hypothetical protein(B0554.5)	31.8273	23.482	32.251	21.7903	9.52294	10.4833	5.74943	3.07373	7.09879e-05	-1.91384	1.25453e-05	0.265386	4.14882
WBGene00011753	T13F3.6	hypothetical protein(T13F3.6)	1033.32	1284.66	991.719	957.735	258.072	316.405	285.555	272.538	1.52132e-70	-1.91388	9.5248e-73	0.265377	69.8178
WBGene00020022	gldc-1	hypothetical protein(R12C12.1)	4774.09	5816.69	5702.39	5103.08	1381.78	1594.41	1364.53	1335.02	4.3357e-137	-1.9144	6.99623e-140	0.265281	136.363
WBGene00005444	srh-237	Serpentine Receptor, class H(srh-237)	35.01	49.8993	29.2275	21.7903	6.66606	13.3424	7.66591	8.19662	2.10383e-05	-1.92259	3.28209e-06	0.263781	4.67699
WBGene00012032	T26C5.2	hypothetical protein(T26C5.2)	50.9236	74.3597	37.2903	59.1451	9.52294	20.0136	11.4989	17.4178	9.41991e-08	-1.92669	9.97137e-09	0.263032	7.02595
WBGene00016274	C30G12.2	hypothetical protein(C30G12.2)	36.0709	65.5539	43.3373	61.2203	15.2367	16.2015	13.4153	9.22119	6.94628e-08	-1.92799	7.24982e-09	0.262796	7.15825
WBGene00008565	acox-1.2	Acyl-coenzyme A oxidase(acox-2)	126.248	99.7985	98.7688	108.951	37.1395	21.9196	26.8307	27.6636	9.74998e-17	-1.93201	4.27934e-18	0.262064	16.011
WBGene00021134	W10G11.1	hypothetical protein(W10G11.1)	78.5072	71.4244	72.5648	51.8816	17.1413	23.8257	20.123	10.2458	2.47753e-10	-1.93767	1.91736e-11	0.261038	9.60598
WBGene00020386	cyp-34A4	CYtochrome P450 family(cyp-34A4)	887.98	950.043	970.555	928.681	272.356	244.928	248.184	207.989	1.49231e-106	-1.93929	4.23815e-109	0.260745	105.826
WBGene00011107	R07E3.6	hypothetical protein(R07E3.6)	67.8981	88.0575	26.204	67.4461	17.1413	29.5438	8.62415	9.22119	2.03382e-05	-1.94795	3.16501e-06	0.259184	4.69169
WBGene00020981	W03D2.6	pseudo	406.328	408	412.209	433.731	109.514	101.021	101.573	117.826	2.20908e-66	-1.95057	1.55419e-68	0.258714	65.6558
WBGene00006948	wrt-2	WaRThog (hedgehog-like family)(wrt-2)	48.8018	55.7698	26.204	53.9569	13.3321	7.62421	9.58239	17.4178	1.08259e-06	-1.95126	1.34581e-07	0.258591	5.96554
WBGene00018400	F43H9.4	hypothetical protein(F43H9.4)	442.399	459.856	429.342	421.279	102.848	111.504	92.9492	145.49	9.65913e-52	-1.95625	1.00376e-53	0.257697	51.0151
WBGene00010791	sodh-2	Alcohol dehydrogenase 2(sodh-2)	41.3754	38.1583	43.3373	43.5806	13.3321	7.62421	9.58239	12.2949	6.1602e-08	-1.96016	6.3936e-09	0.257001	7.2104
WBGene00009049	F22B8.7	hypothetical protein(F22B8.7)	1356.9	1514.59	1555.1	1468.25	347.587	433.627	404.377	325.816	2.97647e-105	-1.96271	8.83738e-108	0.256546	104.526
WBGene00235268	Y54G2A.76	hypothetical protein(Y54G2A.76)	26.5227	29.3525	12.0941	26.9785	3.80918	6.67119	5.74943	8.19662	0.000224287	-1.96347	4.45447e-05	0.256411	3.6492
WBGene00044663	F26G1.10	hypothetical protein(F26G1.10)	136.857	131.108	91.7139	113.102	30.4734	28.5908	23.956	37.9094	3.9229e-17	-1.97002	1.68887e-18	0.25525	16.4064
WBGene00018146	F37C4.6	hypothetical protein(F37C4.6)	314.029	375.712	347.707	301.951	85.7065	73.383	70.9097	112.703	2.46582e-37	-1.97063	3.67653e-39	0.255141	36.608
WBGene00022156	Y71G12B.18	hypothetical protein(Y71G12B.18)	12.7309	14.6763	17.1334	19.715	1.90459	9.53027	4.79119	0	0.00593775	-1.97278	0.00180398	0.254761	2.22638
WBGene00010684	K08F9.1	hypothetical protein(K08F9.1)	199.451	262.216	241.883	212.715	59.9945	49.5574	59.4108	64.5484	5.14578e-33	-1.97489	9.16696e-35	0.254389	32.2885
WBGene00018052	F35F10.1	hypothetical protein(F35F10.1)	196.268	370.82	343.675	237.618	70.4698	87.6784	83.3668	50.2043	1.0768e-18	-1.97578	4.1632e-20	0.254232	17.9679
WBGene00009991	F53F4.8	pseudo	103.969	108.604	129.004	133.855	30.4734	25.7317	24.9142	39.9585	2.27521e-18	-1.97783	8.98749e-20	0.253871	17.643
WBGene00013013	clec-145	C-type LECtin(clec-145)	63.6545	66.5324	71.557	59.1451	10.4752	15.2484	22.0395	18.4424	2.6746e-11	-1.98113	1.86443e-12	0.253291	10.5727
WBGene00006947	wrt-1	Warthog protein 1 N-product(wrt-1)	50.9236	87.0791	41.3216	54.9945	12.3798	22.8726	11.4989	12.2949	6.98712e-08	-1.98788	7.30145e-09	0.252109	7.1557
WBGene00004986	spp-1	SaPosin-like Protein family(spp-1)	2410.38	2676.95	2655.67	2196.67	646.608	721.441	529.906	604.5	1.03605e-101	-1.98978	3.3436e-104	0.251777	100.985
WBGene00019927	fbxc-24	F-box C protein(fbxc-24)	26.5227	29.3525	34.2667	21.7903	11.4275	2.85908	8.62415	5.12289	4.32845e-05	-1.99454	7.24434e-06	0.250948	4.36367
WBGene00010413	H25K10.4	hypothetical protein(H25K10.4)	33.9491	17.6115	33.2589	39.43	7.61835	5.71816	10.5406	7.17204	1.63639e-05	-1.99752	2.52118e-06	0.25043	4.78611
WBGene00016549	C40A11.6	hypothetical protein(C40A11.6)	19.0964	25.4388	28.2197	16.6021	2.85688	6.67119	8.62415	4.09831	0.000194579	-2.0043	3.80542e-05	0.249256	3.7109
WBGene00016546	C40A11.3	hypothetical protein(C40A11.3)	9.54818	10.7626	10.0784	12.4516	2.85688	3.81211	1.91648	2.04915	0.00739469	-2.00603	0.00232769	0.248957	2.13108
WBGene00009637	nspc-13	Nematode Specific Peptide family, group C(nspc-13)	75.3245	89.0359	82.6433	46.6935	13.3321	25.7317	12.4571	21.5161	8.93273e-10	-2.01068	7.35121e-11	0.248157	9.04902
WBGene00206522	F14D2.19	hypothetical protein(F14D2.19)	18.0354	22.5036	12.0941	21.7903	4.76147	6.67119	1.91648	5.12289	0.000638066	-2.01172	0.000142756	0.247978	3.19513
WBGene00011162	chil-19	CHItinase-Like(chil-19)	22.2791	20.5468	15.1177	21.7903	4.76147	0	1.91648	13.3195	0.00492594	-2.01326	0.00145392	0.247713	2.30751
WBGene00077764	F59C6.16	hypothetical protein(F59C6.16)	1482.09	2159.37	1500.68	1527.4	413.296	471.748	372.755	389.339	1.04656e-61	-2.01765	8.44385e-64	0.24696	60.9802
WBGene00021873	clec-82	C-type LECtin(clec-82)	1304.92	977.439	1066.3	1210.92	286.64	243.975	281.722	310.447	4.28347e-80	-2.02216	2.21182e-82	0.246189	79.3682
WBGene00019928	clec-44	C-type LECtin(clec-44)	60.4718	62.6187	51.4001	48.7687	18.0936	18.1075	3.83296	14.3441	2.62087e-08	-2.03781	2.56623e-09	0.243533	7.58155
WBGene00235306	None	pseudo	250.374	330.705	339.644	293.65	75.2312	72.43	63.2438	84.0153	2.42455e-40	-2.04439	3.38026e-42	0.242424	39.6154
WBGene00018760	irg-3	Infection Response Gene(irg-3)	561.221	625.208	631.919	565.51	144.749	135.33	133.195	164.957	1.76025e-83	-2.04588	8.52119e-86	0.242175	82.7544
WBGene00020940	W02D7.4	hypothetical protein(W02D7.4)	307.663	287.655	289.251	336.193	68.5652	77.1952	78.5756	70.6958	1.14066e-50	-2.04779	1.22952e-52	0.241854	49.9428
WBGene00044723	K11H12.11	hypothetical protein(K11H12.11)	23.34	53.8129	38.2981	24.9032	10.4752	6.67119	11.4989	5.12289	1.23224e-05	-2.05355	1.84283e-06	0.24089	4.90931
WBGene00011487	T05E12.6	hypothetical protein(T05E12.6)	342.673	585.093	382.981	380.811	71.422	87.6784	99.6568	148.564	2.22388e-22	-2.05735	6.81821e-24	0.240257	21.6529
WBGene00000139	amx-3	AMine oXidase family(amx-3)	102.908	113.496	139.083	109.989	22.8551	39.0741	21.0813	28.6882	9.62689e-18	-2.05982	3.98298e-19	0.239846	17.0165
WBGene00011677	cyp-13A1	Putative cytochrome P450 CYP13A1(cyp-13A1)	203.694	234.82	216.687	206.489	47.6147	67.6649	49.8284	40.9831	3.83651e-33	-2.06148	6.80978e-35	0.23957	32.4161
WBGene00013947	ZK228.4	hypothetical protein(ZK228.4)	117.761	118.388	104.816	133.855	26.6642	23.8257	30.6636	30.7373	1.18232e-21	-2.08666	3.76224e-23	0.235424	20.9273
WBGene00011852	clec-26	C-type LECtin(clec-26)	85.9336	100.777	95.7453	77.8225	19.9982	15.2484	22.0395	27.6636	6.1021e-16	-2.09021	2.84762e-17	0.234846	15.2145
WBGene00012280	W05E10.1	hypothetical protein(W05E10.1)	158.075	131.108	132.028	104.801	26.6642	33.3559	41.2043	21.5161	6.37771e-19	-2.09549	2.42874e-20	0.233988	18.1953
WBGene00020083	R57.2	hypothetical protein(R57.2)	29.7054	33.2662	27.2118	25.9408	5.71376	8.57724	7.66591	5.12289	2.8489e-06	-2.09715	3.78799e-07	0.23372	5.54532
WBGene00021587	clec-76	C-type LECtin(clec-76)	77.4463	133.065	89.6982	66.4085	28.5688	16.2015	22.0395	18.4424	4.84958e-12	-2.10467	3.15522e-13	0.232504	11.3143
WBGene00021586	clec-75	C-type LECtin(clec-75)	213.243	333.64	323.518	289.5	79.0404	70.524	56.5361	62.4992	1.7713e-32	-2.11054	3.28125e-34	0.23156	31.7517
WBGene00018885	drd-5	dietary restriction down regulated(drd-5)	86.9945	83.1654	87.6825	80.9354	12.3798	16.2015	21.0813	28.6882	6.78284e-15	-2.11963	3.37106e-16	0.230106	14.1686
WBGene00012404	Y6G8.2	hypothetical protein(Y6G8.2)	245.07	319.942	284.212	256.295	67.6129	68.6179	59.4108	56.3517	5.15021e-43	-2.13271	6.68168e-45	0.228029	42.2882
WBGene00013230	fbxb-22	F-box B protein(fbxb-22)	14.8527	13.6978	18.1412	9.3387	2.85688	0.953027	1.91648	7.17204	0.00312653	-2.13823	0.000860891	0.227158	2.50494
WBGene00011285	ttr-28	TransThyretin-Related family domain(ttr-28)	23.34	53.8129	31.2432	32.1666	12.3798	6.67119	8.62415	4.09831	5.41334e-06	-2.14132	7.56464e-07	0.226673	5.26653
WBGene00235113	ZK105.12	hypothetical protein(ZK105.12)	39.2536	27.3957	38.2981	36.3171	11.4275	2.85908	12.4571	5.12289	2.31563e-06	-2.14246	3.03858e-07	0.226494	5.63533
WBGene00019917	clec-43	C-type LECtin(clec-43)	148.527	150.676	136.059	127.629	30.4734	30.4968	32.5801	33.811	3.0859e-27	-2.14522	7.32983e-29	0.226061	26.5106
WBGene00019968	R08F11.4	hypothetical protein(R08F11.4)	116.7	140.892	123.965	119.328	26.6642	24.7787	22.9977	38.9339	4.16586e-22	-2.14981	1.29872e-23	0.225342	21.3803
WBGene00045338	M01B2.13	hypothetical protein(M01B2.13)	31.8273	40.1151	37.2903	33.2042	5.71376	8.57724	10.5406	7.17204	1.26038e-07	-2.15396	1.35125e-08	0.224694	6.8995
WBGene00015535	C06E4.6	hypothetical protein(C06E4.6)	8.48727	17.6115	9.0706	12.4516	3.80918	2.85908	1.91648	2.04915	0.00401484	-2.16163	0.00114462	0.223504	2.39633
WBGene00000169	aqp-1	AQuaPorin or aquaglyceroporin related(aqp-1)	113.517	179.05	164.279	117.253	38.0918	27.6378	21.0813	40.9831	5.14974e-18	-2.17185	2.09739e-19	0.221926	17.2882
WBGene00044801	ZC262.9	hypothetical protein(ZC262.9)	21.2182	31.3093	26.204	26.9785	5.71376	3.81211	5.74943	8.19662	6.59856e-06	-2.17951	9.39548e-07	0.220751	5.18055
WBGene00015371	C03A7.13	hypothetical protein(C03A7.13)	110.334	105.669	104.816	116.215	32.378	18.1075	22.0395	23.5653	9.75327e-21	-2.18447	3.3302e-22	0.219993	20.0108
WBGene00012123	T28D6.3	hypothetical protein(T28D6.3)	50.9236	76.3165	75.5884	67.4461	14.2844	17.1545	11.4989	16.3932	7.08341e-13	-2.19061	4.2291e-14	0.219058	12.1498
WBGene00001783	gst-35	Glutathione S-Transferase(gst-35)	54.1063	68.4892	59.4629	35.2795	11.4275	10.4833	13.4153	12.2949	5.76286e-10	-2.19255	4.63097e-11	0.218764	9.23936
WBGene00009522	F38A1.9	hypothetical protein(F38A1.9)	54.1063	54.7914	42.3295	52.9193	17.1413	10.4833	7.66591	9.22119	4.98139e-10	-2.19389	3.97405e-11	0.218561	9.30265
WBGene00007829	oac-5	O-ACyltransferase homolog(oac-5)	13.7918	33.2662	23.1804	26.9785	1.90459	10.4833	6.70767	2.04915	0.00024019	-2.19513	4.81371e-05	0.218374	3.61945
WBGene00000726	col-153	COLlagen(col-153)	393.597	333.64	328.557	309.215	72.3743	79.1012	69.9514	74.7941	1.59647e-56	-2.20376	1.44262e-58	0.217071	55.7968
WBGene00016776	oac-11	O-ACyltransferase homolog(oac-11)	23.34	21.5252	16.1255	19.715	3.80918	6.67119	4.79119	2.04915	9.36867e-05	-2.21079	1.6968e-05	0.216016	4.02832
WBGene00009485	F36G9.3	hypothetical protein(F36G9.3)	364.953	385.496	370.887	370.435	85.7065	91.4905	59.4108	85.0399	2.76204e-61	-2.21421	2.24628e-63	0.215505	60.5588
WBGene00044617	bus-1	hypothetical protein(bus-1)	13.7918	16.6331	12.0941	7.26343	4.76147	2.85908	0	3.07373	0.00445964	-2.22136	0.00129532	0.21444	2.3507
WBGene00015370	C03A7.12	hypothetical protein(C03A7.12)	92.299	129.151	103.808	116.215	24.7596	21.9196	22.9977	24.5899	3.70257e-21	-2.22934	1.21643e-22	0.213256	20.4315
WBGene00021197	Y17G9A.4	hypothetical protein(Y17G9A.4)	777.646	945.151	987.688	970.187	202.839	182.981	183.982	215.161	8.58476e-103	-2.23062	2.65971e-105	0.213068	102.066
WBGene00019933	R07C12.3	hypothetical protein(R07C12.3)	25.4618	19.5683	14.1098	29.0537	4.76147	3.81211	5.74943	4.09831	4.75652e-05	-2.25566	8.04369e-06	0.209401	4.32271
WBGene00008472	E03H4.4	hypothetical protein(E03H4.4)	28.6445	20.5468	25.1961	33.2042	5.71376	4.76513	5.74943	6.14746	3.02764e-06	-2.26542	4.04324e-07	0.20799	5.5189
WBGene00018913	F56A4.5	hypothetical protein(F56A4.5)	68.9591	85.1223	37.2903	61.2203	12.3798	11.4363	14.3736	14.3441	1.27488e-10	-2.26739	9.63587e-12	0.207706	9.89453
WBGene00006208	str-163	Seven TM Receptor(str-163)	41.3754	51.8561	47.3687	57.0698	13.3321	6.67119	8.62415	12.2949	2.29957e-10	-2.27581	1.77221e-11	0.206497	9.63835
WBGene00189995	C06E7.88	hypothetical protein(C06E7.88)	15.9136	19.5683	21.1647	18.6774	1.90459	3.81211	5.74943	4.09831	0.000103632	-2.27757	1.89097e-05	0.206244	3.98451
WBGene00001240	elo-2	Elongation of very long chain fatty acids protein(elo-2)	3182.73	3066.36	2797.78	2873.21	644.703	570.863	537.572	704.909	1.36893e-172	-2.27861	1.14865e-175	0.206097	171.864
WBGene00022263	Y73C8C.4	hypothetical protein(Y73C8C.4)	33.9491	35.223	38.2981	29.0537	6.66606	10.4833	6.70767	4.09831	1.30216e-07	-2.28144	1.39857e-08	0.205693	6.88533
WBGene00019472	cyp-35B1	CYtochrome P450 family(cyp-35B1)	1148.96	1091.91	1067.31	1259.69	207.6	266.847	232.852	228.481	1.13304e-133	-2.2868	2.12084e-136	0.204929	132.946
WBGene00015710	C12D5.9	hypothetical protein(C12D5.9)	22.2791	16.6331	24.1883	12.4516	4.76147	4.76513	5.74943	0	0.00035627	-2.291	7.45745e-05	0.204334	3.44822
WBGene00010123	F55G11.2	hypothetical protein(F55G11.2)	12.7309	10.7626	10.0784	9.3387	0.952294	4.76513	0.958239	2.04915	0.00488134	-2.29586	0.0014386	0.203647	2.31146
WBGene00007473	chil-8	CHItinase-Like(chil-8)	10.6091	13.6978	17.1334	2.07527	2.85688	2.85908	0.958239	2.04915	0.00991839	-2.31958	0.00325982	0.200326	2.00356
WBGene00010928	clec-258	C-type LECtin(clec-258)	605.779	607.597	643.005	746.058	129.512	125.8	124.571	141.392	1.1397e-96	-2.32067	4.04593e-99	0.200174	95.9432
WBGene00000978	dhs-15	DeHydrogenases, Short chain(dhs-15)	15.9136	14.6763	12.0941	6.2258	2.85688	3.81211	0	3.07373	0.00364531	-2.33113	0.00102529	0.198728	2.43827
WBGene00011340	ugt-30	UDP-glucuronosyltransferase(ugt-30)	132.614	228.95	169.318	126.591	31.4257	37.168	33.5384	27.6636	3.0406e-22	-2.34048	9.38106e-24	0.197444	21.517
WBGene00012886	Y45F10D.6	hypothetical protein(Y45F10D.6)	49.8627	47.9424	51.4001	48.7687	11.4275	9.53027	12.4571	5.12289	4.24143e-11	-2.35308	3.03057e-12	0.195728	10.3725
WBGene00017535	atf-8	ATF (cAMP-dependent transcription factor) family(atf-8)	16.9745	24.4604	31.2432	17.6398	3.80918	2.85908	5.74943	5.12289	2.27033e-05	-2.36976	3.56383e-06	0.193477	4.64391
WBGene00012070	T26H5.8	hypothetical protein(T26H5.8)	362.831	281.784	281.189	332.042	62.8514	75.2891	63.2438	39.9585	3.65054e-43	-2.37694	4.68894e-45	0.192517	42.4376
WBGene00017334	F10D2.8	hypothetical protein(F10D2.8)	54.1063	61.6403	63.4942	43.5806	6.66606	11.4363	19.1648	5.12289	4.85797e-10	-2.38829	3.87245e-11	0.191009	9.31355
WBGene00016338	srb-14	pseudo	8.48727	9.78417	10.0784	7.26343	2.85688	1.90605	0	2.04915	0.0083154	-2.38953	0.00266374	0.190845	2.08012
WBGene00019977	fpn-1.2	FerroPortiN(fpn-1.2)	23.34	36.2014	27.2118	22.8279	5.71376	3.81211	4.79119	6.14746	1.13322e-06	-2.42655	1.41335e-07	0.18601	5.94569
WBGene00008634	F10A3.4	hypothetical protein(F10A3.4)	382.988	309.18	272.118	305.064	60.9468	49.5574	53.6614	71.7204	3.97207e-49	-2.43012	4.5379e-51	0.18555	48.401
WBGene00004003	pgp-9	P-GlycoProtein related(pgp-9)	1030.14	1056.69	1117.7	1027.26	192.363	232.538	193.564	156.76	3.12334e-135	-2.44645	5.44311e-138	0.183461	134.505
WBGene00020016	lipl-3	Lipase(lipl-3)	216.425	243.626	221.726	270.822	35.2349	57.1816	43.1208	38.9339	7.83955e-43	-2.44738	1.02719e-44	0.183344	42.1057
WBGene00011150	nhr-269	Nuclear Hormone Receptor family(nhr-269)	369.196	309.18	360.808	377.698	60.9468	64.8058	55.5779	77.8679	1.67997e-64	-2.45292	1.24699e-66	0.182641	63.7747
WBGene00011397	T03E6.8	hypothetical protein(T03E6.8)	550.612	681.957	671.225	582.112	119.989	99.1148	106.365	122.949	1.16471e-94	-2.47272	4.36025e-97	0.180151	93.9338
WBGene00008341	ttr-44	TransThyretin-Related family domain(ttr-44)	1686.84	1736.69	1568.21	2002.63	293.307	347.855	258.725	350.405	4.44427e-128	-2.48466	8.6057e-131	0.178667	127.352
WBGene00004176	pqn-97	Prion-like-(Q/N-rich)-domain-bearing protein(pqn-97)	13.7918	18.5899	13.102	9.3387	2.85688	5.71816	0.958239	0	0.00156636	-2.50846	0.000393992	0.175743	2.80511
WBGene00019978	hacd-1	Hydroxy-Acyl-CoA Dehydrogenase(hacd-1)	2214.12	2213.18	1910.87	1878.12	412.343	283.049	252.017	496.92	7.20538e-25	-2.50855	1.9254e-26	0.175732	24.1423
WBGene00194769	Y32B12C.5	pseudo	583.5	721.093	751.852	615.316	138.083	121.987	102.532	106.556	1.78418e-87	-2.50896	7.71575e-90	0.175682	86.7486
WBGene00009879	F49C12.10	hypothetical protein(F49C12.10)	149.588	177.093	149.161	145.269	24.7596	23.8257	22.9977	37.9094	8.03384e-32	-2.51089	1.52971e-33	0.175447	31.0951
WBGene00014842	clec-30	pseudo	22.2791	36.2014	28.2197	23.8656	5.71376	5.71816	5.74943	2.04915	9.01388e-07	-2.51594	1.10426e-07	0.174834	6.04509
WBGene00015366	C03A7.2	hypothetical protein(C03A7.2)	46.68	63.5971	68.5335	43.5806	6.66606	5.71816	16.2901	10.2458	5.49926e-11	-2.51763	3.98256e-12	0.174629	10.2597
WBGene00021585	clec-74	C-type LECtin(clec-74)	11.67	13.6978	21.1647	16.6021	0.952294	3.81211	2.87472	3.07373	0.000209629	-2.5628	4.14441e-05	0.169247	3.67855
WBGene00009523	clec-165	C-type LECtin(clec-165)	84.8727	90.0144	86.6747	88.1988	17.1413	19.0605	9.58239	12.2949	1.49853e-20	-2.58725	5.20372e-22	0.166403	19.8243
WBGene00011851	clec-23	pseudo	3.18273	11.741	12.0941	8.30106	0.952294	1.90605	0	3.07373	0.00995789	-2.59467	0.00327538	0.165549	2.00183
WBGene00016361	drd-10	dietary restriction down regulated(drd-10)	13.7918	24.4604	22.1726	28.0161	1.90459	5.71816	2.87472	4.09831	1.16118e-05	-2.60254	1.72532e-06	0.164649	4.9351
WBGene00016092	cyp-33B1	CYtochrome P450 family(cyp-33B1)	144.284	157.525	127.996	136.968	27.6165	23.8257	22.0395	18.4424	1.23701e-32	-2.62098	2.25957e-34	0.162557	31.9076
WBGene00044024	C35A5.11	hypothetical protein(C35A5.11)	14.8527	14.6763	9.0706	9.3387	0	0.953027	5.74943	1.02458	0.00286963	-2.6282	0.000779966	0.161746	2.54217
WBGene00015532	C06E4.3	hypothetical protein(C06E4.3)	35.01	60.6619	39.306	33.2042	7.61835	8.57724	4.79119	6.14746	1.32858e-09	-2.63225	1.11908e-10	0.161292	8.87661
WBGene00021137	W10G11.4	hypothetical protein(W10G11.4)	18.0354	21.5252	14.1098	13.4892	3.80918	2.85908	3.83296	0	0.000123332	-2.66082	2.28148e-05	0.158129	3.90892
WBGene00009855	clec-22	C-type LECtin(clec-22)	27.5836	37.1798	21.1647	25.9408	3.80918	3.81211	4.79119	5.12289	2.32207e-07	-2.67797	2.5914e-08	0.156261	6.63412
WBGene00020610	None	pseudo	16.9745	29.3525	9.0706	19.715	1.90459	3.81211	1.91648	4.09831	8.78238e-05	-2.68669	1.57814e-05	0.155319	4.05639
WBGene00007866	C32H11.3	hypothetical protein(C32H11.3)	145.344	151.655	142.106	141.118	19.0459	21.9196	24.9142	22.5407	1.62146e-36	-2.71495	2.48039e-38	0.152306	35.7901
WBGene00019471	cyp-35B2	CYtochrome P450 family(cyp-35B2)	270.532	248.518	242.891	331.005	41.9009	45.7453	38.3296	38.9339	2.62537e-54	-2.7269	2.54182e-56	0.15105	53.5808
WBGene00013946	ZK228.3	hypothetical protein(ZK228.3)	183.537	174.158	157.224	157.72	21.9028	19.0605	26.8307	33.811	2.97916e-38	-2.73259	4.365e-40	0.150455	37.5259
WBGene00012023	clec-34	C-type LECtin(clec-34)	13.7918	3.91367	18.1412	10.3763	0.952294	2.85908	1.91648	1.02458	0.00216014	-2.76638	0.00056663	0.146972	2.66552
WBGene00016644	abhd-3.2	ABHydrolase Domain containing homolog(abhd-3.2)	163.38	136	158.232	175.36	22.8551	29.5438	12.4571	26.639	2.01979e-33	-2.79185	3.55904e-35	0.144401	32.6947
WBGene00009486	F36G9.7	hypothetical protein(F36G9.7)	30.7663	44.0288	38.2981	28.0161	4.76147	5.71816	4.79119	5.12289	2.00683e-09	-2.79264	1.73184e-10	0.144322	8.69749
WBGene00012631	Y38H6C.19	hypothetical protein(Y38H6C.19)	15.9136	24.4604	18.1412	22.8279	0.952294	3.81211	3.83296	3.07373	7.9786e-06	-2.80405	1.15613e-06	0.143185	5.09807
WBGene00008357	nspc-16	Nematode Specific Peptide family, group C(nspc-16)	55.1672	76.3165	68.5335	51.8816	14.2844	6.67119	2.87472	12.2949	2.34621e-13	-2.80794	1.34324e-14	0.142799	12.6296
WBGene00008647	F10C2.7	hypothetical protein(F10C2.7)	8.48727	24.4604	15.1177	16.6021	1.90459	0.953027	3.83296	2.04915	0.000126681	-2.89073	2.34916e-05	0.134836	3.89729
WBGene00009146	F26C11.1	Putative acid phosphatase F26C11.1(F26C11.1)	253.557	259.281	258.008	176.398	29.5211	24.7787	31.6219	42.0077	4.31874e-44	-2.89349	5.46359e-46	0.134578	43.3646
WBGene00016063	delm-2	DEgenerin Linked to Mechanosensation(delm-2)	15.9136	9.78417	20.1569	19.715	2.85688	0	4.79119	1.02458	0.000145743	-2.90941	2.75081e-05	0.133101	3.83641
WBGene00021135	W10G11.2	hypothetical protein(W10G11.2)	244.009	334.619	361.816	249.032	39.9963	43.8392	38.3296	34.8356	1.99764e-52	-2.92077	2.02433e-54	0.132057	51.6995
WBGene00016664	C45E5.1	hypothetical protein(C45E5.1)	132.614	137.957	122.957	118.29	19.9982	22.8726	17.2483	6.14746	8.18772e-29	-2.93875	1.79683e-30	0.130421	28.0868
WBGene00009215	thn-2	THaumatiN family(thn-2)	5075.39	4805.98	4819.51	5017.99	679.938	634.716	560.57	638.312	0	-2.97178	0	0.127469	Inf
WBGene00021136	W10G11.3	hypothetical protein(W10G11.3)	130.492	268.086	198.545	157.72	20.9505	24.7787	25.8725	19.467	6.25246e-31	-3.05078	1.25106e-32	0.120677	30.2039
WBGene00001156	ech-7	Enoyl-CoA Hydratase(ech-7)	1700.64	2103.6	1880.64	1661.25	242.835	205.854	186.857	224.382	1.13434e-208	-3.09532	8.05377e-212	0.117008	207.945
WBGene00007331	pho-11	Putative acid phosphatase 11(pho-11)	2495.26	2264.06	2272.69	2252.7	266.642	248.74	253.933	316.594	0	-3.09782	0	0.116806	Inf
WBGene00008485	ugt-43	UDP-GlucuronosylTransferase(ugt-43)	33.9491	43.0503	39.306	25.9408	2.85688	6.67119	2.87472	4.09831	6.59273e-10	-3.10876	5.34465e-11	0.115923	9.18093
WBGene00012323	oac-54	O-ACyltransferase homolog(oac-54)	103.969	115.453	140.09	101.688	9.52294	17.1545	11.4989	14.3441	3.67142e-29	-3.13675	7.9386e-31	0.113696	28.4352
WBGene00008014	fbxa-172	F-box A protein(fbxa-172)	13.7918	10.7626	8.06276	10.3763	0.952294	0	1.91648	2.04915	0.000892465	-3.14081	0.000207865	0.113376	3.04941
WBGene00011952	T23F6.5	hypothetical protein(T23F6.5)	3.18273	9.78417	6.04707	15.5645	1.90459	1.90605	0	0	0.00614145	-3.1632	0.00187696	0.11163	2.21173
WBGene00017499	pud-1.1	Protein Up-regulated in Daf-2(gf)(pud-1.1)	409.511	439.309	378.95	444.107	55.233	40.9801	38.3296	48.1551	1.96065e-100	-3.19471	6.45408e-103	0.109219	99.7076
WBGene00007867	C32H11.4	hypothetical protein(C32H11.4)	224.913	279.827	250.953	201.301	21.9028	29.5438	31.6219	19.467	1.73703e-54	-3.2194	1.64812e-56	0.107365	53.7602
WBGene00009213	thn-1	THaumatiN family(thn-1)	393.597	418.762	395.075	344.494	53.3285	43.8392	24.9142	44.0568	3.71011e-81	-3.22433	1.89181e-83	0.106999	80.4306
WBGene00006075	str-7	Seven TM Receptor(str-7)	260.983	293.525	281.189	256.295	27.6165	34.309	29.7054	20.4915	1.06386e-71	-3.27929	6.45474e-74	0.102999	70.9731
WBGene00000710	col-137	COLlagen(col-137)	40.3145	29.3525	19.1491	17.6398	3.80918	1.90605	2.87472	2.04915	1.67281e-07	-3.31737	1.83012e-08	0.100317	6.77655
WBGene00004177	pqn-98	Prion-like-(Q/N-rich)-domain-bearing protein(pqn-98)	8.48727	24.4604	26.204	9.3387	1.90459	2.85908	0	2.04915	7.98282e-05	-3.3354	1.42364e-05	0.0990708	4.09784
WBGene00009836	fbxa-185	F-box A protein(fbxa-185)	11.67	12.7194	16.1255	10.3763	0.952294	2.85908	0.958239	0	0.000206933	-3.39594	4.08711e-05	0.0949995	3.68417
WBGene00020700	T22F3.11	hypothetical protein(T22F3.11)	63.6545	121.324	81.6354	73.6719	11.4275	4.76513	10.5406	5.12289	1.18363e-19	-3.41302	4.28592e-21	0.0938814	18.9268
WBGene00044960	fbxa-173	pseudo	2.12182	4.89208	13.102	12.4516	1.90459	0.953027	0	0	0.00667819	-3.49086	0.00207074	0.08895	2.17534
WBGene00009048	cth-1	CystaTHionine gamma lyase(cth-1)	3395.97	3314.88	3334.96	3220.81	269.499	284.002	277.889	271.513	0	-3.58816	0	0.083149	Inf
WBGene00014047	clec-61	C-type LECtin(clec-61)	38.1927	36.2014	41.3216	33.2042	3.80918	3.81211	2.87472	1.02458	1.10053e-11	-3.67866	7.3662e-13	0.0780934	10.9584
WBGene00017498	pud-4	Protein Up-regulated in Daf-2(gf)(pud-4)	10.6091	2.93525	10.0784	5.18816	0.952294	0	0.958239	0	0.00625369	-3.88827	0.00191772	0.0675326	2.20386
WBGene00009706	argk-1	ARGinine Kinase(argk-1)	2060.28	1993.04	2090.27	2326.37	133.321	122.94	149.485	127.048	0	-3.98997	0	0.0629359	Inf
WBGene00012308	oac-53	O-ACyltransferase homolog(oac-53)	28.6445	41.0935	37.2903	39.43	2.85688	1.90605	2.87472	1.02458	1.72006e-11	-4.06976	1.16795e-12	0.0595498	10.7645
WBGene00021999	thn-5	THaumatiN family(thn-5)	28.6445	44.0288	41.3216	35.2795	0	2.85908	1.91648	4.09831	2.40809e-11	-4.09227	1.66777e-12	0.058628	10.6183
WBGene00005715	srv-4	Serpentine Receptor, class V(srv-4)	8.48727	13.6978	16.1255	12.4516	0	0.953027	0.958239	1.02458	0.000143568	-4.12337	2.70122e-05	0.0573774	3.84294
WBGene00017490	pud-2.1	Protein Up-regulated in Daf-2(gf)(pud-2.1)	316.151	352.23	273.126	319.591	14.2844	19.0605	12.4571	26.639	8.08623e-82	-4.13106	4.07104e-84	0.0570727	81.0923
WBGene00017205	F07C4.12	Carboxylic ester hydrolase(F07C4.12)	99.7254	57.7266	88.6904	84.0483	3.80918	3.81211	3.83296	6.14746	5.60781e-23	-4.2363	1.66138e-24	0.0530575	22.2512
WBGene00017501	pud-3	Protein Up-regulated in Daf-2(gf)(pud-3)	15.9136	12.7194	5.03922	6.2258	0	0.953027	0.958239	0	0.00120263	-4.35969	0.000292255	0.0487082	2.91987
WBGene00219308	W06G6.20	hypothetical protein(W06G6.20)	112.456	142.849	155.208	115.177	4.76147	6.67119	3.83296	4.09831	1.46608e-35	-4.75999	2.3184e-37	0.0369062	34.8338
WBGene00000133	amt-1	Putative ammonium transporter 1(amt-1)	9.54818	11.741	18.1412	18.6774	0.952294	0	0	1.02458	8.93196e-05	-4.90226	1.60848e-05	0.0334405	4.04905
WBGene00086565	W06G6.17	hypothetical protein(W06G6.17)	84.8727	91.9712	94.7374	78.8601	2.85688	5.71816	1.91648	1.02458	2.03406e-24	-4.91249	5.57979e-26	0.0332043	23.6916
WBGene00012312	W06G6.10	hypothetical protein(W06G6.10)	30.7663	41.0935	41.3216	40.4677	0	2.85908	1.91648	0	5.53637e-11	-4.98694	4.02015e-12	0.0315341	10.2568
WBGene00012311	W06G6.9	hypothetical protein(W06G6.9)	12.7309	12.7194	9.0706	16.6021	0	0.953027	0	0	1.61693e-05	-5.43808	2.48806e-06	0.0230662	4.79131
WBGene00018459	F45D11.14	hypothetical protein(F45D11.14)	194.146	277.87	183.428	206.489	0	0	0	18.4424	0.0052026	-5.55185	0.0015457	0.021317	2.28378
WBGene00021236	pud-1.1	Protein Up-regulated in Daf-2(gf)(pud-1.2)	23.34	3.91367	4.03138	22.8279	0	0	0	0	6.66337e-06	-6.2386	9.50496e-07	0.0132432	5.17631

## Sheet: Overlap_UP_WT_v_nhr-49(-)
UP_WT&UP_NHR49 (NHR-49-independent)			WT ONLY (NHR-49-dependent)			NHR ONLY (Compensatory)
WBGene00008167	acox-1.5		WBGene00014046	B0205.13		WBGene00018647	21ur-14767
WBGene00000067	act-5		WBGene00017806	C39B5.14		WBGene00010887	21ur-4114
WBGene00015178	B0416.2		WBGene00002102	catp-3		WBGene00021298	abt-4
WBGene00015791	C15C7.5		WBGene00001477	clec-172		WBGene00013949	AC3.5
WBGene00007682	C18D11.6		WBGene00044719	clec-204		WBGene00014755	aman-3
WBGene00045411	C25F9.11		WBGene00015660	clec-265		WBGene00020248	aqp-8
WBGene00016164	C27D9.2		WBGene00000983	clec-52		WBGene00044479	arl-7
WBGene00007807	C29F3.7		WBGene00015052	clec-60		WBGene00012467	arrd-8
WBGene00007890	C33A12.19		WBGene00022256	cpr-4		WBGene00012501	asp-12
WBGene00016425	C34H4.2		WBGene00010647	cyp-14A3		WBGene00194928	B0024.4
WBGene00016769	C49C8.5		WBGene00044644	dhs-20		WBGene00007404	B0403.3
WBGene00008234	C50F4.9		WBGene00019404	dmsr-12		WBGene00008019	B0457.6
WBGene00016845	C50F7.5		WBGene00008560	drd-1		WBGene00000176	B0507.10
WBGene00016929	C54F6.12		WBGene00021741	F26A1.8		WBGene00007180	B0507.8
WBGene00000302	cav-2		WBGene00021601	fmo-2		WBGene00020859	bath-25
WBGene00021580	clec-174		WBGene00001857	fmo-5		WBGene00013119	best-5
WBGene00016912	clec-86		WBGene00018492	fut-2		WBGene00016662	C03B1.2
WBGene00000782	cpr-2		WBGene00012604	gst-4		WBGene00044997	C06E1.7
WBGene00011830	cyp-29A2		WBGene00001752	H06A10.1		WBGene00018823	C07E3.3
WBGene00009431	dct-17		WBGene00003094	hil-6		WBGene00021517	C08E8.3
WBGene00022644	dod-19		WBGene00014175	his-20		WBGene00003610	C08E8.4
WBGene00008462	E02H4.4		WBGene00189950	hpo-26		WBGene00016765	C10C5.2
WBGene00001158	ech-9		WBGene00010707	ins-19		WBGene00019101	C13G3.1
WBGene00017277	F09C12.2		WBGene00019262	K05B2.4		WBGene00016659	C16D9.4
WBGene00008621	F09C8.1		WBGene00012007	K05F1.1		WBGene00016265	C23H4.6
WBGene00017378	F11C7.6		WBGene00008208	K05F1.10		WBGene00009756	C25F6.8
WBGene00008988	F20G2.5		WBGene00021603	K08C7.4		WBGene00018412	C25F9.16
WBGene00017726	F22H10.2		WBGene00022413	lys-5		WBGene00008644	C25F9.4
WBGene00017764	F25A2.1		WBGene00013901	nhr-167		WBGene00015259	C25F9.6
WBGene00018209	F39G3.4		WBGene00000784	nspe-2		WBGene00044534	C29G2.2
WBGene00018210	F39G3.5		WBGene00014135	oac-57		WBGene00008226	C29G2.2
WBGene00018343	F42A10.7		WBGene00010368	pho-13		WBGene00018350	C35A5.3
WBGene00009649	F43C1.5		WBGene00004058	pmp-1		WBGene00007439	C38H2.2
WBGene00018997	F57B9.3		WBGene00019411	sptl-2		WBGene00008105	C39H7.2
WBGene00009964	fip-6		WBGene00009902	T25B9.1		WBGene00000022	C39H7.4
WBGene00013923	ghi-1		WBGene00018398	ugt-16		WBGene00002274	C44F1.1
WBGene00019146	H02F09.3		WBGene00019405	Y102A11A.3		WBGene00005422	C45B11.2
WBGene00019273	H43E16.1		WBGene00019738	Y46H3A.5		WBGene00206354	C45B2.2
WBGene00013073	hmit-1.1		WBGene00001506	Y50D4B.2		WBGene00018643	C45B2.8
WBGene00021518	hpo-6		WBGene00022040	Y65B4BR.1		WBGene00016728	C46H11.2
WBGene00002021	hsp-17		WBGene00019579	Y73B6BL.37		WBGene00007071	C49C8.1
WBGene00002058	ifd-2		WBGene00001894	ZK896.4		WBGene00012295	C49C8.8
WBGene00002067	ifp-1		WBGene00001480	ZK971.1		WBGene00016783	C49G7.10
WBGene00016669	ilys-2					WBGene00017095	C49G7.12
WBGene00016670	ilys-3					WBGene00016788	C49G7.7
WBGene00002094	ins-11					WBGene00003879	C50B8.4
WBGene00007864	irg-6					WBGene00000755	C50F4.1
WBGene00045096	K01A6.7					WBGene00021128	C54E10.11
WBGene00019388	K04F1.9					WBGene00020247	cah-3
WBGene00010658	K08D8.4					WBGene00009318	cebp-1
WBGene00045012	K08F4.13					WBGene00005142	cld-9
WBGene00002199	kin-15					WBGene00022638	clec-118
WBGene00018725	kreg-1					WBGene00017308	clec-125
WBGene00003092	lys-3					WBGene00008091	clec-186
WBGene00010851	M04C3.2					WBGene00004124	clec-187
WBGene00010899	M28.8					WBGene00004859	clec-221
WBGene00008216	mec-19					WBGene00010127	clec-70
WBGene00021451	mltn-8					WBGene00012593	clec-71
WBGene00017948	mth-1					WBGene00045048	clec-9
WBGene00017947	mth-2					WBGene00000551	clx-1
WBGene00003522	nas-3					WBGene00016785	cnc-11
WBGene00003571	ncx-6					WBGene00004013	cnc-4
WBGene00003605	nhr-6					WBGene00007726	cnp-3
WBGene00012594	nspe-5					WBGene00009429	col-182
WBGene00018707	oac-31					WBGene00007553	cyp-36A1
WBGene00003957	pcp-2					WBGene00014137	D1007.19
WBGene00004144	pqn-60					WBGene00013955	dgat-2
WBGene00020052	R13A5.10					WBGene00010977	dod-20
WBGene00021335	spp-23					WBGene00007989	drd-50
WBGene00005188	srg-31					WBGene00044034	E02C12.10
WBGene00006191	str-144					WBGene00015216	egrh-1
WBGene00020149	T01D1.4					WBGene00021032	F02H6.6
WBGene00011494	T05F1.9					WBGene00020648	F08G2.5
WBGene00020760	T24C4.4					WBGene00044900	F09F9.3
WBGene00020898	T28D9.9					WBGene00016229	F10C2.3
WBGene00019717	trx-3					WBGene00017678	F12A10.9
WBGene00006627	tsp-1					WBGene00015046	F13A2.4
WBGene00013900	ugt-18					WBGene00018268	F14E5.1
WBGene00015739	ugt-7					WBGene00000191	F15B9.6
WBGene00022419	Y102A11A.9					WBGene00020579	F15E6.10
WBGene00021339	Y34F4.4					WBGene00007506	F22E5.1
WBGene00045416	Y37H2A.14					WBGene00016526	F27E5.7
WBGene00012664	Y39B6A.1					WBGene00018345	F27E5.9
WBGene00021519	Y41D4B.17					WBGene00175027	F28F5.6
WBGene00021520	Y41D4B.18					WBGene00013659	F29G9.7
WBGene00021529	Y41G9A.5					WBGene00022760	F32B4.8
WBGene00012947	Y47H9C.1					WBGene00019564	F32G8.3
WBGene00044376	Y49F6B.12					WBGene00012101	F33D11.8
WBGene00022013	Y60C6A.1					WBGene00077593	F33H12.7
WBGene00022645	ZK6.11					WBGene00010296	F35E12.4
WBGene00022649	ZK84.1					WBGene00015048	F40F12.8
WBGene00014173	ZK970.7					WBGene00018813	F41C3.2
						WBGene00016218	F42C5.3
						WBGene00021581	F46B3.1
						WBGene00045253	F46C3.6
						WBGene00007440	F46G10.4
						WBGene00206524	F48C1.11
						WBGene00019546	F48F5.2
						WBGene00009798	F49F1.7
						WBGene00005657	F49H6.13
						WBGene00005551	F49H6.3
						WBGene00018594	F52F10.2
						WBGene00017703	F53A9.7
						WBGene00018730	F54D11.3
						WBGene00016340	F54E2.1
						WBGene00013559	F55A12.6
						WBGene00008539	F55G11.7
						WBGene00019782	F59B1.10
						WBGene00008799	faah-2
						WBGene00015716	fbxa-105
						WBGene00007694	fbxa-12
						WBGene00007097	fbxa-136
						WBGene00015362	fbxa-59
						WBGene00012603	fbxa-8
						WBGene00014836	fbxa-91
						WBGene00008301	fipr-22
						WBGene00002106	gba-2
						WBGene00006467	gem-4
						WBGene00007913	glct-6
						WBGene00007517	gpx-3
						WBGene00016997	gst-36
						WBGene00019145	H02F09.2
						WBGene00013493	H23N18.6
						WBGene00012500	hpo-2
						WBGene00009488	ifo-1
						WBGene00001784	igeg-2
						WBGene00007833	ins-12
						WBGene00006372	ins-23
						WBGene00009339	irg-2
						WBGene00008486	irg-5
						WBGene00004231	K04A8.1
						WBGene00206418	K09D9.1
						WBGene00004236	kri-1
						WBGene00003653	lec-11
						WBGene00045305	lips-5
						WBGene00020792	M04C3.5
						WBGene00018865	M60.7
						WBGene00015217	M7.12
						WBGene00011957	magu-2
						WBGene00017933	msp-71
						WBGene00008916	nhr-11
						WBGene00016525	nhr-178
						WBGene00014193	nhr-247
						WBGene00044569	nhr-37
						WBGene00001577	nhr-63
						WBGene00015225	nlp-30
						WBGene00195179	nlp-31
						WBGene00017449	nlp-34
						WBGene00007414	nmat-1
						WBGene00022494	nspd-11
						WBGene00017510	nspe-6
						WBGene00009428	nspe-7
						WBGene00023252	oac-14
						WBGene00003460	oac-20
						WBGene00007772	oac-6
						WBGene00020725	ora-1
						WBGene00045253	otpl-3
						WBGene00000558	pals-23
						WBGene00014902	pals-37
						WBGene00044396	pals-39
						WBGene00017413	pha-4
						WBGene00009846	pho-1
						WBGene00014138	pho-6
						WBGene00018005	plp-2
						WBGene00017905	pqn-37
						WBGene00016728	ptr-17
						WBGene00008976	ptr-22
						WBGene00015167	R02D5.3
						WBGene00011187	R10D12.6
						WBGene00021118	scl-27
						WBGene00235271	sma-5
						WBGene00021352	sox-4
						WBGene00011190	srd-65
						WBGene00011725	srh-212
						WBGene00009907	sri-36
						WBGene00045457	sri-38
						WBGene00007672	sri-39
						WBGene00194803	sri-74
						WBGene00023483	srr-6
						WBGene00022891	swt-6
						WBGene00019373	syx-2
						WBGene00012824	T05B11.4
						WBGene00009842	T05C1.1
						WBGene00003768	T09F5.12
						WBGene00008850	T14E8.4
						WBGene00008577	T19D12.4
						WBGene00003769	T19D12.5
						WBGene00015373	T21D12.7
						WBGene00011929	T22G5.1
						WBGene00021494	T23F11.6
						WBGene00005548	T25B6.6
						WBGene00009914	T27C10.9
						WBGene00012081	T27C5.8
						WBGene00015859	tes-1
						WBGene00007724	trhr-1
						WBGene00015522	ugt-44
						WBGene00044035	valv-1
						WBGene00016542	W02F12.8
						WBGene00021109	W09C3.1
						WBGene00018696	W10C8.5
						WBGene00020580	Y105C5B.20
						WBGene00005586	Y26D4A.3
						WBGene00016230	Y27F2A.6
						WBGene00015227	Y37E3.11
						WBGene00009432	Y38E10A.28
						WBGene00077704	Y38H6C.8
						WBGene00000281	Y40B10B.1
						WBGene00044488	Y41D4B.15
						WBGene00012824	Y43F8B.14
						WBGene00002095	Y49E10.5
						WBGene00007517	Y51H4A.25
						WBGene00020455	Y54G2A.45
						WBGene00235311	Y57E12B.11
						WBGene00007947	Y57G11C.6
						WBGene00202498	Y60C6A.2
						WBGene00013304	Y73C8B.1
						WBGene00013559	Y75B8A.28
						WBGene00012621	Y75B8A.39
						WBGene00021582	ZC250.4
						WBGene00008602	ZC513.14
						WBGene00018706	zip-10
						WBGene00022886	ZK1290.1
						WBGene00043981	ZK1290.10
						WBGene00008229	ZK1290.14
						WBGene00022258	ZK262.2
						WBGene00004020	ZK546.3

## Sheet: gProfiler_Independent
NHR-49-Independent
source	term_name	term_id	adjusted_p_value	negative_log10_of_adjusted_p_value	term_size	query_size	intersection_size	effective_domain_size	intersections
GO:MF	lysozyme activity	GO:0003796	0.0338088	1.47097	11	92	2	46904	WBGENE00016669,WBGENE00016670
GO:MF	peptidoglycan muralytic activity	GO:0061783	0.0338088	1.47097	11	92	2	46904	WBGENE00016669,WBGENE00016670
GO:MF	catalytic activity	GO:0003824	0.047965	1.31908	4059	92	19	46904	WBGENE00008167,WBGENE00000782,WBGENE00011830,WBGENE00001158,WBGENE00017277,WBGENE00008621,WBGENE00018209,WBGENE00018210,WBGENE00018997,WBGENE00016669,WBGENE00016670,WBGENE00002199,WBGENE00003522,WBGENE00018707,WBGENE00003957,WBGENE00020052,WBGENE00020149,WBGENE00013900,WBGENE00015739
GO:BP	innate immune response	GO:0045087	6.62286e-16	15.179	237	92	15	46904	WBGENE00007682,WBGENE00007807,WBGENE00016769,WBGENE00008234,WBGENE00016912,WBGENE00009431,WBGENE00022644,WBGENE00008988,WBGENE00017726,WBGENE00018210,WBGENE00010658,WBGENE00010851,WBGENE00020760,WBGENE00006627,WBGENE00022645
GO:BP	immune response	GO:0006955	1.16182e-15	14.9349	246	92	15	46904	WBGENE00007682,WBGENE00007807,WBGENE00016769,WBGENE00008234,WBGENE00016912,WBGENE00009431,WBGENE00022644,WBGENE00008988,WBGENE00017726,WBGENE00018210,WBGENE00010658,WBGENE00010851,WBGENE00020760,WBGENE00006627,WBGENE00022645
GO:BP	immune system process	GO:0002376	1.31251e-15	14.8819	248	92	15	46904	WBGENE00007682,WBGENE00007807,WBGENE00016769,WBGENE00008234,WBGENE00016912,WBGENE00009431,WBGENE00022644,WBGENE00008988,WBGENE00017726,WBGENE00018210,WBGENE00010658,WBGENE00010851,WBGENE00020760,WBGENE00006627,WBGENE00022645
GO:BP	defense response to other organism	GO:0098542	5.66112e-14	13.2471	319	92	15	46904	WBGENE00007682,WBGENE00007807,WBGENE00016769,WBGENE00008234,WBGENE00016912,WBGENE00009431,WBGENE00022644,WBGENE00008988,WBGENE00017726,WBGENE00018210,WBGENE00010658,WBGENE00010851,WBGENE00020760,WBGENE00006627,WBGENE00022645
GO:BP	response to other organism	GO:0051707	5.66112e-14	13.2471	319	92	15	46904	WBGENE00007682,WBGENE00007807,WBGENE00016769,WBGENE00008234,WBGENE00016912,WBGENE00009431,WBGENE00022644,WBGENE00008988,WBGENE00017726,WBGENE00018210,WBGENE00010658,WBGENE00010851,WBGENE00020760,WBGENE00006627,WBGENE00022645
GO:BP	response to biotic stimulus	GO:0009607	5.66112e-14	13.2471	319	92	15	46904	WBGENE00007682,WBGENE00007807,WBGENE00016769,WBGENE00008234,WBGENE00016912,WBGENE00009431,WBGENE00022644,WBGENE00008988,WBGENE00017726,WBGENE00018210,WBGENE00010658,WBGENE00010851,WBGENE00020760,WBGENE00006627,WBGENE00022645
GO:BP	response to external biotic stimulus	GO:0043207	5.66112e-14	13.2471	319	92	15	46904	WBGENE00007682,WBGENE00007807,WBGENE00016769,WBGENE00008234,WBGENE00016912,WBGENE00009431,WBGENE00022644,WBGENE00008988,WBGENE00017726,WBGENE00018210,WBGENE00010658,WBGENE00010851,WBGENE00020760,WBGENE00006627,WBGENE00022645
GO:BP	biological process involved in interspecies interaction between organisms	GO:0044419	6.21144e-14	13.2068	321	92	15	46904	WBGENE00007682,WBGENE00007807,WBGENE00016769,WBGENE00008234,WBGENE00016912,WBGENE00009431,WBGENE00022644,WBGENE00008988,WBGENE00017726,WBGENE00018210,WBGENE00010658,WBGENE00010851,WBGENE00020760,WBGENE00006627,WBGENE00022645
GO:BP	defense response	GO:0006952	7.1307e-14	13.1469	324	92	15	46904	WBGENE00007682,WBGENE00007807,WBGENE00016769,WBGENE00008234,WBGENE00016912,WBGENE00009431,WBGENE00022644,WBGENE00008988,WBGENE00017726,WBGENE00018210,WBGENE00010658,WBGENE00010851,WBGENE00020760,WBGENE00006627,WBGENE00022645
GO:BP	response to external stimulus	GO:0009605	7.8245e-11	10.1065	523	92	15	46904	WBGENE00007682,WBGENE00007807,WBGENE00016769,WBGENE00008234,WBGENE00016912,WBGENE00009431,WBGENE00022644,WBGENE00008988,WBGENE00017726,WBGENE00018210,WBGENE00010658,WBGENE00010851,WBGENE00020760,WBGENE00006627,WBGENE00022645
GO:BP	response to stress	GO:0006950	3.26437e-09	8.4862	812	92	16	46904	WBGENE00007682,WBGENE00007807,WBGENE00016769,WBGENE00008234,WBGENE00016912,WBGENE00009431,WBGENE00022644,WBGENE00008988,WBGENE00017726,WBGENE00018210,WBGENE00010658,WBGENE00018725,WBGENE00010851,WBGENE00020760,WBGENE00006627,WBGENE00022645
GO:BP	response to stimulus	GO:0050896	1.54571e-05	4.81087	2356	92	20	46904	WBGENE00007682,WBGENE00007807,WBGENE00016769,WBGENE00008234,WBGENE00016912,WBGENE00009431,WBGENE00022644,WBGENE00017277,WBGENE00008988,WBGENE00017726,WBGENE00018210,WBGENE00010658,WBGENE00018725,WBGENE00010851,WBGENE00017948,WBGENE00017947,WBGENE00006191,WBGENE00020760,WBGENE00006627,WBGENE00022645
GO:BP	biological_process	GO:0008150	4.65752e-05	4.33185	8962	92	40	46904	WBGENE00008167,WBGENE00000067,WBGENE00007682,WBGENE00007807,WBGENE00016769,WBGENE00008234,WBGENE00000302,WBGENE00016912,WBGENE00000782,WBGENE00011830,WBGENE00009431,WBGENE00022644,WBGENE00001158,WBGENE00017277,WBGENE00008621,WBGENE00008988,WBGENE00017726,WBGENE00017764,WBGENE00018209,WBGENE00018210,WBGENE00018997,WBGENE00013073,WBGENE00010658,WBGENE00002199,WBGENE00018725,WBGENE00010851,WBGENE000…
WP	Metapathway UDP-glucuronosyltransferases	WP:WP1431	0.0480438	1.31836	66	92	2	46904	WBGENE00013900,WBGENE00015739
TF	Transfac - AHR	TF:M00000	1.10643e-26	25.9561	18479	92	86	46904	WBGENE00015178,WBGENE00015791,WBGENE00007682,WBGENE00045411,WBGENE00016164,WBGENE00007807,WBGENE00007890,WBGENE00016425,WBGENE00016769,WBGENE00008234,WBGENE00016845,WBGENE00016929,WBGENE00000302,WBGENE00021580,WBGENE00016912,WBGENE00000782,WBGENE00011830,WBGENE00009431,WBGENE00022644,WBGENE00008462,WBGENE00001158,WBGENE00017277,WBGENE00008621,WBGENE00017378,WBGENE00008988,WBGENE00017726,WBGENE000…
TF	Factor: elt-3; motif: TCTTATCA	TF:M07154	1.19647e-10	9.9221	2235	92	24	46904	WBGENE00016845,WBGENE00021580,WBGENE00016912,WBGENE00001158,WBGENE00017277,WBGENE00008621,WBGENE00008988,WBGENE00018209,WBGENE00019273,WBGENE00013073,WBGENE00002067,WBGENE00016670,WBGENE00010851,WBGENE00017948,WBGENE00017947,WBGENE00003571,WBGENE00018707,WBGENE00019717,WBGENE00015739,WBGENE00021339,WBGENE00045416,WBGENE00021519,WBGENE00012947,WBGENE00022645
TF	Factor: che-1; motif: GAARCC	TF:M02379	2.85407e-09	8.54453	7946	92	42	46904	WBGENE00015178,WBGENE00007890,WBGENE00016425,WBGENE00016769,WBGENE00016929,WBGENE00016912,WBGENE00000782,WBGENE00008462,WBGENE00017277,WBGENE00008621,WBGENE00017378,WBGENE00018343,WBGENE00009649,WBGENE00013923,WBGENE00019146,WBGENE00019273,WBGENE00021518,WBGENE00002021,WBGENE00002067,WBGENE00016670,WBGENE00019388,WBGENE00010658,WBGENE00002199,WBGENE00018725,WBGENE00003092,WBGENE00010899,WBGENE000…
TF	Factor: ceh-48; motif: NNYCRATAN	TF:M08052	5.79428e-05	4.237	12331	92	45	46904	WBGENE00015178,WBGENE00015791,WBGENE00007682,WBGENE00045411,WBGENE00007807,WBGENE00007890,WBGENE00016769,WBGENE00008234,WBGENE00016929,WBGENE00021580,WBGENE00009431,WBGENE00022644,WBGENE00001158,WBGENE00008621,WBGENE00017378,WBGENE00008988,WBGENE00017764,WBGENE00018997,WBGENE00019273,WBGENE00002021,WBGENE00016669,WBGENE00016670,WBGENE00007864,WBGENE00010658,WBGENE00002199,WBGENE00018725,WBGENE000…
TF	Factor: lin-14; motif: GAACRC	TF:M02380	0.000182728	3.73819	7160	92	31	46904	WBGENE00015178,WBGENE00016164,WBGENE00007807,WBGENE00016425,WBGENE00008234,WBGENE00016845,WBGENE00011830,WBGENE00009431,WBGENE00001158,WBGENE00017378,WBGENE00008988,WBGENE00013923,WBGENE00019146,WBGENE00002094,WBGENE00045096,WBGENE00019388,WBGENE00002199,WBGENE00018725,WBGENE00010851,WBGENE00008216,WBGENE00021451,WBGENE00003571,WBGENE00003605,WBGENE00012594,WBGENE00018707,WBGENE00020149,WBGENE000…
TF	Factor: lim-4; motif: NNTAATTAR	TF:M08054	0.000218261	3.66102	2051	92	15	46904	WBGENE00015791,WBGENE00000302,WBGENE00017726,WBGENE00018210,WBGENE00009649,WBGENE00018997,WBGENE00002021,WBGENE00002094,WBGENE00007864,WBGENE00019388,WBGENE00003571,WBGENE00003605,WBGENE00012594,WBGENE00006627,WBGENE00022649
TF	Factor: elt-3; motif: TCTTATCA; match class: 1	TF:M07154_1	0.00120903	2.91756	208	92	5	46904	WBGENE00016845,WBGENE00001158,WBGENE00017277,WBGENE00002067,WBGENE00003571
TF	Factor: che-1; motif: GAARCC; match class: 1	TF:M02379_1	0.00126531	2.8978	1838	92	13	46904	WBGENE00016425,WBGENE00016769,WBGENE00016912,WBGENE00008462,WBGENE00017277,WBGENE00021518,WBGENE00002021,WBGENE00002067,WBGENE00019388,WBGENE00003092,WBGENE00003571,WBGENE00003957,WBGENE00022419

## Sheet: gProfiler_Dependent
NHR-49-Dependent
source	term_name	term_id	adjusted_p_value	negative_log10_of_adjusted_p_value	term_size	query_size	intersection_size	effective_domain_size	intersections
GO:MF	molecular_function	GO:0003674	1.7263e-08	7.76288	10193	43	29	46904	WBGENE00002102,WBGENE00001477,WBGENE00044719,WBGENE00015660,WBGENE00000983,WBGENE00015052,WBGENE00022256,WBGENE00019404,WBGENE00008560,WBGENE00001857,WBGENE00001752,WBGENE00003094,WBGENE00010707,WBGENE00019262,WBGENE00012007,WBGENE00008208,WBGENE00021603,WBGENE00013901,WBGENE00000784,WBGENE00004058,WBGENE00019411,WBGENE00009902,WBGENE00018398,WBGENE00019738,WBGENE00001506,WBGENE00022040,WBGENE000…
GO:MF	catalytic activity	GO:0003824	3.94535e-06	5.40391	4059	43	17	46904	WBGENE00001477,WBGENE00000983,WBGENE00022256,WBGENE00019404,WBGENE00008560,WBGENE00003094,WBGENE00010707,WBGENE00012007,WBGENE00013901,WBGENE00000784,WBGENE00004058,WBGENE00009902,WBGENE00018398,WBGENE00001506,WBGENE00022040,WBGENE00019579,WBGENE00001480
GO:MF	oxidoreductase activity, acting on paired donors, with incorporation or reduction of molecular oxygen, NAD(P)H as one donor, and incorporation of one atom of oxygen	GO:0016709	3.29963e-05	4.48153	15	43	3	46904	WBGENE00001477,WBGENE00009902,WBGENE00001480
GO:MF	monooxygenase activity	GO:0004497	0.000157209	3.80352	91	43	4	46904	WBGENE00001477,WBGENE00010707,WBGENE00009902,WBGENE00001480
GO:MF	oxidoreductase activity, acting on paired donors, with incorporation or reduction of molecular oxygen	GO:0016705	0.000557318	3.2539	125	43	4	46904	WBGENE00001477,WBGENE00010707,WBGENE00009902,WBGENE00001480
GO:MF	N,N-dimethylaniline monooxygenase activity	GO:0004499	0.00175045	2.75685	7	43	2	46904	WBGENE00001477,WBGENE00001480
GO:MF	C-acyltransferase activity	GO:0016408	0.00233257	2.63217	8	43	2	46904	WBGENE00012007,WBGENE00018398
GO:MF	oxidoreductase activity, acting on NAD(P)H, oxygen as acceptor	GO:0050664	0.00233257	2.63217	8	43	2	46904	WBGENE00001477,WBGENE00001480
GO:MF	NAD(P)H oxidase H2O2-forming activity	GO:0016174	0.00233257	2.63217	8	43	2	46904	WBGENE00001477,WBGENE00001480
GO:MF	binding	GO:0005488	0.00267247	2.57309	6458	43	17	46904	WBGENE00002102,WBGENE00001477,WBGENE00044719,WBGENE00015660,WBGENE00015052,WBGENE00001857,WBGENE00001752,WBGENE00010707,WBGENE00012007,WBGENE00008208,WBGENE00021603,WBGENE00004058,WBGENE00009902,WBGENE00018398,WBGENE00019738,WBGENE00001894,WBGENE00001480
GO:MF	oxidoreductase activity	GO:0016491	0.0150246	1.8232	552	43	5	46904	WBGENE00001477,WBGENE00000983,WBGENE00010707,WBGENE00009902,WBGENE00001480
GO:MF	carbohydrate binding	GO:0030246	0.0154739	1.8104	293	43	4	46904	WBGENE00044719,WBGENE00015052,WBGENE00021603,WBGENE00019738
GO:MF	NADP binding	GO:0050661	0.0190874	1.71925	22	43	2	46904	WBGENE00001477,WBGENE00001480
GO:MF	heterocyclic compound binding	GO:1901363	0.0303857	1.51733	2989	43	10	46904	WBGENE00001477,WBGENE00015660,WBGENE00001857,WBGENE00010707,WBGENE00012007,WBGENE00008208,WBGENE00004058,WBGENE00018398,WBGENE00001894,WBGENE00001480
GO:MF	organic cyclic compound binding	GO:0097159	0.0311275	1.50686	2998	43	10	46904	WBGENE00001477,WBGENE00015660,WBGENE00001857,WBGENE00010707,WBGENE00012007,WBGENE00008208,WBGENE00004058,WBGENE00018398,WBGENE00001894,WBGENE00001480
GO:BP	biological_process	GO:0008150	2.08519e-08	7.68085	8962	43	28	46904	WBGENE00014046,WBGENE00002102,WBGENE00001477,WBGENE00044719,WBGENE00015660,WBGENE00000983,WBGENE00015052,WBGENE00022256,WBGENE00019404,WBGENE00008560,WBGENE00021601,WBGENE00001857,WBGENE00003094,WBGENE00189950,WBGENE00010707,WBGENE00019262,WBGENE00012007,WBGENE00008208,WBGENE00000784,WBGENE00010368,WBGENE00004058,WBGENE00019411,WBGENE00009902,WBGENE00018398,WBGENE00001506,WBGENE00022040,WBGENE000…
GO:BP	lipid metabolic process	GO:0006629	4.29265e-06	5.36727	473	43	8	46904	WBGENE00022256,WBGENE00019404,WBGENE00021601,WBGENE00189950,WBGENE00004058,WBGENE00009902,WBGENE00018398,WBGENE00022040
GO:BP	metabolic process	GO:0008152	4.82935e-06	5.31611	5430	43	20	46904	WBGENE00001477,WBGENE00000983,WBGENE00022256,WBGENE00019404,WBGENE00008560,WBGENE00021601,WBGENE00003094,WBGENE00189950,WBGENE00010707,WBGENE00012007,WBGENE00008208,WBGENE00000784,WBGENE00004058,WBGENE00019411,WBGENE00009902,WBGENE00018398,WBGENE00001506,WBGENE00022040,WBGENE00019579,WBGENE00001480
GO:BP	defense response to Gram-positive bacterium	GO:0050830	0.00321417	2.49293	42	43	3	46904	WBGENE00014046,WBGENE00044719,WBGENE00015052
GO:BP	organic substance metabolic process	GO:0071704	0.00666221	2.17638	4906	43	15	46904	WBGENE00022256,WBGENE00019404,WBGENE00021601,WBGENE00003094,WBGENE00189950,WBGENE00012007,WBGENE00008208,WBGENE00000784,WBGENE00004058,WBGENE00019411,WBGENE00009902,WBGENE00018398,WBGENE00001506,WBGENE00022040,WBGENE00019579
GO:BP	cellular lipid metabolic process	GO:0044255	0.00667299	2.17568	348	43	5	46904	WBGENE00022256,WBGENE00019404,WBGENE00004058,WBGENE00018398,WBGENE00022040
GO:BP	primary metabolic process	GO:0044238	0.0169203	1.77159	4653	43	14	46904	WBGENE00022256,WBGENE00019404,WBGENE00021601,WBGENE00189950,WBGENE00012007,WBGENE00008208,WBGENE00000784,WBGENE00004058,WBGENE00019411,WBGENE00009902,WBGENE00018398,WBGENE00001506,WBGENE00022040,WBGENE00019579
GO:BP	defense response to bacterium	GO:0042742	0.0398552	1.39951	97	43	3	46904	WBGENE00014046,WBGENE00044719,WBGENE00015052
GO:BP	response to bacterium	GO:0009617	0.0398552	1.39951	97	43	3	46904	WBGENE00014046,WBGENE00044719,WBGENE00015052
KEGG	Drug metabolism - cytochrome P450	KEGG:00982	0.000263507	3.57921	51	43	3	46904	WBGENE00001477,WBGENE00001752,WBGENE00001480
TF	Transfac - AHR	TF:M00000	4.58504e-15	14.3387	18479	43	42	46904	WBGENE00014046,WBGENE00017806,WBGENE00002102,WBGENE00001477,WBGENE00044719,WBGENE00015660,WBGENE00000983,WBGENE00015052,WBGENE00022256,WBGENE00010647,WBGENE00044644,WBGENE00019404,WBGENE00008560,WBGENE00021741,WBGENE00021601,WBGENE00001857,WBGENE00018492,WBGENE00012604,WBGENE00001752,WBGENE00014175,WBGENE00189950,WBGENE00010707,WBGENE00019262,WBGENE00012007,WBGENE00008208,WBGENE00021603,WBGENE000…
TF	Factor: che-1; motif: GAARCC	TF:M02379	2.44444e-05	4.61182	7946	43	21	46904	WBGENE00014046,WBGENE00017806,WBGENE00002102,WBGENE00015660,WBGENE00015052,WBGENE00022256,WBGENE00010647,WBGENE00021741,WBGENE00021601,WBGENE00001857,WBGENE00018492,WBGENE00012604,WBGENE00001752,WBGENE00014175,WBGENE00010707,WBGENE00021603,WBGENE00000784,WBGENE00019411,WBGENE00009902,WBGENE00001506,WBGENE00019579
TF	Factor: ceh-48; motif: NNYCRATAN	TF:M08052	0.000677875	3.16885	12331	43	24	46904	WBGENE00002102,WBGENE00001477,WBGENE00044719,WBGENE00015660,WBGENE00000983,WBGENE00010647,WBGENE00044644,WBGENE00019404,WBGENE00021601,WBGENE00001857,WBGENE00012604,WBGENE00001752,WBGENE00189950,WBGENE00012007,WBGENE00008208,WBGENE00022413,WBGENE00000784,WBGENE00019411,WBGENE00018398,WBGENE00019405,WBGENE00001506,WBGENE00022040,WBGENE00019579,WBGENE00001480
TF	Factor: pal-1; motif: GTAATWAA	TF:M08055	0.00438781	2.35775	1859	43	8	46904	WBGENE00000983,WBGENE00008560,WBGENE00001857,WBGENE00010707,WBGENE00019411,WBGENE00019738,WBGENE00001506,WBGENE00001894

## Sheet: gProfiler_Compensatory
NHR-49-Compensatory
source	term_name	term_id	adjusted_p_value	negative_log10_of_adjusted_p_value	term_size	query_size	intersection_size	effective_domain_size	intersections
GO:MF	molecular_function	GO:0003674	2.46581e-05	4.60804	10193	220	82	46904	WBGENE00010887,WBGENE00008019,WBGENE00000176,WBGENE00020859,WBGENE00013119,WBGENE00003610,WBGENE00016765,WBGENE00016265,WBGENE00018412,WBGENE00008644,WBGENE00000022,WBGENE00002274,WBGENE00016728,WBGENE00007071,WBGENE00012295,WBGENE00000755,WBGENE00021128,WBGENE00020247,WBGENE00004859,WBGENE00004013,WBGENE00014137,WBGENE00013955,WBGENE00015216,WBGENE00021032,WBGENE00020648,WBGENE00017678,WBGENE000…
GO:MF	carbohydrate binding	GO:0030246	3.86602e-05	4.41274	293	220	11	46904	WBGENE00002274,WBGENE00014137,WBGENE00021032,WBGENE00021581,WBGENE00018594,WBGENE00013493,WBGENE00008916,WBGENE00014138,WBGENE00021118,WBGENE00012621,WBGENE00021582
GO:MF	binding	GO:0005488	0.00141849	2.84817	6458	220	55	46904	WBGENE00008019,WBGENE00020859,WBGENE00003610,WBGENE00016765,WBGENE00018412,WBGENE00000022,WBGENE00002274,WBGENE00016728,WBGENE00007071,WBGENE00012295,WBGENE00021128,WBGENE00004859,WBGENE00004013,WBGENE00014137,WBGENE00013955,WBGENE00015216,WBGENE00021032,WBGENE00012101,WBGENE00021581,WBGENE00019546,WBGENE00018594,WBGENE00019782,WBGENE00015716,WBGENE00007694,WBGENE00015362,WBGENE00002106,WBGENE000…
GO:BP	response to other organism	GO:0051707	8.4127e-33	32.0751	319	220	34	46904	WBGENE00002274,WBGENE00018643,WBGENE00016783,WBGENE00016788,WBGENE00010127,WBGENE00009429,WBGENE00014137,WBGENE00007989,WBGENE00015216,WBGENE00044900,WBGENE00017678,WBGENE00020579,WBGENE00007506,WBGENE00019564,WBGENE00012101,WBGENE00016218,WBGENE00021581,WBGENE00007440,WBGENE00015716,WBGENE00015362,WBGENE00016997,WBGENE00009339,WBGENE00008486,WBGENE00000558,WBGENE00014138,WBGENE00018005,WBGENE000…
GO:BP	response to external biotic stimulus	GO:0043207	8.4127e-33	32.0751	319	220	34	46904	WBGENE00002274,WBGENE00018643,WBGENE00016783,WBGENE00016788,WBGENE00010127,WBGENE00009429,WBGENE00014137,WBGENE00007989,WBGENE00015216,WBGENE00044900,WBGENE00017678,WBGENE00020579,WBGENE00007506,WBGENE00019564,WBGENE00012101,WBGENE00016218,WBGENE00021581,WBGENE00007440,WBGENE00015716,WBGENE00015362,WBGENE00016997,WBGENE00009339,WBGENE00008486,WBGENE00000558,WBGENE00014138,WBGENE00018005,WBGENE000…
GO:BP	defense response to other organism	GO:0098542	8.4127e-33	32.0751	319	220	34	46904	WBGENE00002274,WBGENE00018643,WBGENE00016783,WBGENE00016788,WBGENE00010127,WBGENE00009429,WBGENE00014137,WBGENE00007989,WBGENE00015216,WBGENE00044900,WBGENE00017678,WBGENE00020579,WBGENE00007506,WBGENE00019564,WBGENE00012101,WBGENE00016218,WBGENE00021581,WBGENE00007440,WBGENE00015716,WBGENE00015362,WBGENE00016997,WBGENE00009339,WBGENE00008486,WBGENE00000558,WBGENE00014138,WBGENE00018005,WBGENE000…
GO:BP	response to biotic stimulus	GO:0009607	8.4127e-33	32.0751	319	220	34	46904	WBGENE00002274,WBGENE00018643,WBGENE00016783,WBGENE00016788,WBGENE00010127,WBGENE00009429,WBGENE00014137,WBGENE00007989,WBGENE00015216,WBGENE00044900,WBGENE00017678,WBGENE00020579,WBGENE00007506,WBGENE00019564,WBGENE00012101,WBGENE00016218,WBGENE00021581,WBGENE00007440,WBGENE00015716,WBGENE00015362,WBGENE00016997,WBGENE00009339,WBGENE00008486,WBGENE00000558,WBGENE00014138,WBGENE00018005,WBGENE000…
GO:BP	biological process involved in interspecies interaction between organisms	GO:0044419	1.04465e-32	31.981	321	220	34	46904	WBGENE00002274,WBGENE00018643,WBGENE00016783,WBGENE00016788,WBGENE00010127,WBGENE00009429,WBGENE00014137,WBGENE00007989,WBGENE00015216,WBGENE00044900,WBGENE00017678,WBGENE00020579,WBGENE00007506,WBGENE00019564,WBGENE00012101,WBGENE00016218,WBGENE00021581,WBGENE00007440,WBGENE00015716,WBGENE00015362,WBGENE00016997,WBGENE00009339,WBGENE00008486,WBGENE00000558,WBGENE00014138,WBGENE00018005,WBGENE000…
GO:BP	defense response	GO:0006952	1.44154e-32	31.8412	324	220	34	46904	WBGENE00002274,WBGENE00018643,WBGENE00016783,WBGENE00016788,WBGENE00010127,WBGENE00009429,WBGENE00014137,WBGENE00007989,WBGENE00015216,WBGENE00044900,WBGENE00017678,WBGENE00020579,WBGENE00007506,WBGENE00019564,WBGENE00012101,WBGENE00016218,WBGENE00021581,WBGENE00007440,WBGENE00015716,WBGENE00015362,WBGENE00016997,WBGENE00009339,WBGENE00008486,WBGENE00000558,WBGENE00014138,WBGENE00018005,WBGENE000…
GO:BP	innate immune response	GO:0045087	2.14845e-26	25.6679	237	220	27	46904	WBGENE00002274,WBGENE00018643,WBGENE00016783,WBGENE00016788,WBGENE00010127,WBGENE00009429,WBGENE00014137,WBGENE00007989,WBGENE00015216,WBGENE00044900,WBGENE00017678,WBGENE00020579,WBGENE00007506,WBGENE00019564,WBGENE00012101,WBGENE00016218,WBGENE00007440,WBGENE00015716,WBGENE00015362,WBGENE00008486,WBGENE00000558,WBGENE00014138,WBGENE00019373,WBGENE00008577,WBGENE00016542,WBGENE00009432,WBGENE000…
GO:BP	immune response	GO:0006955	6.01143e-26	25.221	246	220	27	46904	WBGENE00002274,WBGENE00018643,WBGENE00016783,WBGENE00016788,WBGENE00010127,WBGENE00009429,WBGENE00014137,WBGENE00007989,WBGENE00015216,WBGENE00044900,WBGENE00017678,WBGENE00020579,WBGENE00007506,WBGENE00019564,WBGENE00012101,WBGENE00016218,WBGENE00007440,WBGENE00015716,WBGENE00015362,WBGENE00008486,WBGENE00000558,WBGENE00014138,WBGENE00019373,WBGENE00008577,WBGENE00016542,WBGENE00009432,WBGENE000…
GO:BP	immune system process	GO:0002376	7.51354e-26	25.1242	248	220	27	46904	WBGENE00002274,WBGENE00018643,WBGENE00016783,WBGENE00016788,WBGENE00010127,WBGENE00009429,WBGENE00014137,WBGENE00007989,WBGENE00015216,WBGENE00044900,WBGENE00017678,WBGENE00020579,WBGENE00007506,WBGENE00019564,WBGENE00012101,WBGENE00016218,WBGENE00007440,WBGENE00015716,WBGENE00015362,WBGENE00008486,WBGENE00000558,WBGENE00014138,WBGENE00019373,WBGENE00008577,WBGENE00016542,WBGENE00009432,WBGENE000…
GO:BP	response to external stimulus	GO:0009605	1.57199e-25	24.8035	523	220	34	46904	WBGENE00002274,WBGENE00018643,WBGENE00016783,WBGENE00016788,WBGENE00010127,WBGENE00009429,WBGENE00014137,WBGENE00007989,WBGENE00015216,WBGENE00044900,WBGENE00017678,WBGENE00020579,WBGENE00007506,WBGENE00019564,WBGENE00012101,WBGENE00016218,WBGENE00021581,WBGENE00007440,WBGENE00015716,WBGENE00015362,WBGENE00016997,WBGENE00009339,WBGENE00008486,WBGENE00000558,WBGENE00014138,WBGENE00018005,WBGENE000…
GO:BP	response to stress	GO:0006950	1.5431e-22	21.8116	812	220	37	46904	WBGENE00002274,WBGENE00018643,WBGENE00016783,WBGENE00016788,WBGENE00010127,WBGENE00009429,WBGENE00014137,WBGENE00007989,WBGENE00015216,WBGENE00044900,WBGENE00017678,WBGENE00020579,WBGENE00007506,WBGENE00019564,WBGENE00012101,WBGENE00016218,WBGENE00021581,WBGENE00007440,WBGENE00018730,WBGENE00015716,WBGENE00007694,WBGENE00015362,WBGENE00007517,WBGENE00016997,WBGENE00009339,WBGENE00008486,WBGENE000…
GO:BP	response to stimulus	GO:0050896	2.6071e-12	11.5838	2356	220	44	46904	WBGENE00016265,WBGENE00002274,WBGENE00018643,WBGENE00016783,WBGENE00016788,WBGENE00004859,WBGENE00010127,WBGENE00009429,WBGENE00014137,WBGENE00007989,WBGENE00015216,WBGENE00044900,WBGENE00017678,WBGENE00015046,WBGENE00020579,WBGENE00007506,WBGENE00019564,WBGENE00012101,WBGENE00016218,WBGENE00021581,WBGENE00007440,WBGENE00018730,WBGENE00019782,WBGENE00015716,WBGENE00007694,WBGENE00015362,WBGENE000…
GO:BP	biological_process	GO:0008150	4.28927e-10	9.36762	8962	220	88	46904	WBGENE00013949,WBGENE00012467,WBGENE00008019,WBGENE00000176,WBGENE00003610,WBGENE00016765,WBGENE00016265,WBGENE00018412,WBGENE00008644,WBGENE00000022,WBGENE00002274,WBGENE00018643,WBGENE00016728,WBGENE00007071,WBGENE00012295,WBGENE00016783,WBGENE00016788,WBGENE00021128,WBGENE00004859,WBGENE00010127,WBGENE00004013,WBGENE00009429,WBGENE00014137,WBGENE00007989,WBGENE00015216,WBGENE00020648,WBGENE000…
GO:BP	response to bacterium	GO:0009617	1.57759e-05	4.80201	97	220	8	46904	WBGENE00018643,WBGENE00009429,WBGENE00020579,WBGENE00021581,WBGENE00016997,WBGENE00009339,WBGENE00018005,WBGENE00021582
GO:BP	defense response to bacterium	GO:0042742	1.57759e-05	4.80201	97	220	8	46904	WBGENE00018643,WBGENE00009429,WBGENE00020579,WBGENE00021581,WBGENE00016997,WBGENE00009339,WBGENE00018005,WBGENE00021582
GO:BP	defense response to Gram-positive bacterium	GO:0050830	0.0347224	1.45939	42	220	4	46904	WBGENE00018643,WBGENE00009429,WBGENE00021581,WBGENE00021582
TF	Transfac - AHR	TF:M00000	3.80236e-51	50.4199	18479	220	195	46904	WBGENE00018647,WBGENE00010887,WBGENE00021298,WBGENE00020248,WBGENE00044479,WBGENE00012467,WBGENE00012501,WBGENE00194928,WBGENE00007404,WBGENE00008019,WBGENE00000176,WBGENE00007180,WBGENE00020859,WBGENE00013119,WBGENE00016662,WBGENE00018823,WBGENE00021517,WBGENE00003610,WBGENE00016765,WBGENE00019101,WBGENE00016659,WBGENE00016265,WBGENE00009756,WBGENE00018412,WBGENE00008644,WBGENE00015259,WBGENE000…
TF	Factor: elt-3; motif: TCTTATCA	TF:M07154	9.64582e-21	20.0157	2235	220	52	46904	WBGENE00012467,WBGENE00012501,WBGENE00008019,WBGENE00013119,WBGENE00016662,WBGENE00018823,WBGENE00044534,WBGENE00018350,WBGENE00008105,WBGENE00002274,WBGENE00206354,WBGENE00018643,WBGENE00007071,WBGENE00005142,WBGENE00000551,WBGENE00004013,WBGENE00014137,WBGENE00015046,WBGENE00020579,WBGENE00010296,WBGENE00015048,WBGENE00021581,WBGENE00007440,WBGENE00019546,WBGENE00005657,WBGENE00005551,WBGENE000…
TF	Factor: che-1; motif: GAARCC	TF:M02379	6.34459e-17	16.1976	7946	220	92	46904	WBGENE00018647,WBGENE00021298,WBGENE00044479,WBGENE00007404,WBGENE00000176,WBGENE00016662,WBGENE00018823,WBGENE00021517,WBGENE00003610,WBGENE00016765,WBGENE00019101,WBGENE00016659,WBGENE00008644,WBGENE00015259,WBGENE00008226,WBGENE00018350,WBGENE00000022,WBGENE00002274,WBGENE00018643,WBGENE00007071,WBGENE00012295,WBGENE00016783,WBGENE00016788,WBGENE00021128,WBGENE00005142,WBGENE00017308,WBGENE000…
TF	Factor: ceh-48; motif: NNYCRATAN	TF:M08052	2.96046e-12	11.5286	12331	220	109	46904	WBGENE00018647,WBGENE00044479,WBGENE00012467,WBGENE00194928,WBGENE00007404,WBGENE00016662,WBGENE00021517,WBGENE00003610,WBGENE00016765,WBGENE00019101,WBGENE00016659,WBGENE00009756,WBGENE00008644,WBGENE00008226,WBGENE00018350,WBGENE00008105,WBGENE00002274,WBGENE00005422,WBGENE00206354,WBGENE00018643,WBGENE00016728,WBGENE00007071,WBGENE00012295,WBGENE00003879,WBGENE00000755,WBGENE00009318,WBGENE000…
TF	Factor: lin-14; motif: GAACRC	TF:M02380	1.22054e-08	7.91345	7160	220	70	46904	WBGENE00010887,WBGENE00021298,WBGENE00194928,WBGENE00008019,WBGENE00007180,WBGENE00020859,WBGENE00013119,WBGENE00018823,WBGENE00021517,WBGENE00016265,WBGENE00015259,WBGENE00008226,WBGENE00018350,WBGENE00008105,WBGENE00002274,WBGENE00206354,WBGENE00007071,WBGENE00017308,WBGENE00004859,WBGENE00010127,WBGENE00012593,WBGENE00004013,WBGENE00007989,WBGENE00007506,WBGENE00012101,WBGENE00010296,WBGENE000…
TF	Factor: blmp-1; motif: RAAAGNGARAR	TF:M07150	9.54945e-05	4.02002	1427	220	21	46904	WBGENE00008019,WBGENE00018350,WBGENE00007439,WBGENE00077593,WBGENE00010296,WBGENE00045253,WBGENE00007440,WBGENE00019546,WBGENE00018594,WBGENE00015362,WBGENE00006372,WBGENE00004231,WBGENE00045305,WBGENE00007772,WBGENE00044396,WBGENE00011725,WBGENE00003768,WBGENE00044035,WBGENE00002095,WBGENE00202498,WBGENE00021582
TF	Factor: pal-1; motif: GTAATWAA	TF:M08055	0.000536579	3.27037	1859	220	23	46904	WBGENE00007404,WBGENE00013119,WBGENE00009756,WBGENE00008644,WBGENE00015259,WBGENE00008539,WBGENE00012603,WBGENE00007833,WBGENE00006372,WBGENE00009339,WBGENE00004231,WBGENE00008916,WBGENE00045457,WBGENE00023483,WBGENE00003768,WBGENE00008850,WBGENE00021494,WBGENE00020580,WBGENE00044488,WBGENE00002095,WBGENE00020455,WBGENE00235311,WBGENE00012621
TF	Factor: elt-3; motif: TCTTATCA; match class: 1	TF:M07154_1	0.0013422	2.87218	208	220	7	46904	WBGENE00018350,WBGENE00018643,WBGENE00010296,WBGENE00007440,WBGENE00007833,WBGENE00045457,WBGENE00007672
TF	Factor: Skn-1; motif: NWWWATCATBNN	TF:M00230	0.00731681	2.13568	195	220	6	46904	WBGENE00016659,WBGENE00020648,WBGENE00020579,WBGENE00045457,WBGENE00044488,WBGENE00004020
TF	Factor: che-1; motif: GAARCC; match class: 1	TF:M02379_1	0.0249843	1.60233	1838	220	19	46904	WBGENE00044479,WBGENE00016765,WBGENE00008644,WBGENE00010127,WBGENE00012593,WBGENE00009429,WBGENE00013955,WBGENE00017678,WBGENE00019564,WBGENE00016218,WBGENE00019782,WBGENE00016997,WBGENE00012500,WBGENE00015225,WBGENE00022891,WBGENE00011929,WBGENE00005548,WBGENE00002095,WBGENE00022258
