# Supplementary figures and images for: NHR-49/PPAR-α and HLH-30/TFEB cooperate for C. elegans host defense via a flavin-containing monooxygenase
Source: eLife journal article supplement (doi:10.7554/elife.62775), 2021-05-12

**A**

Wild type

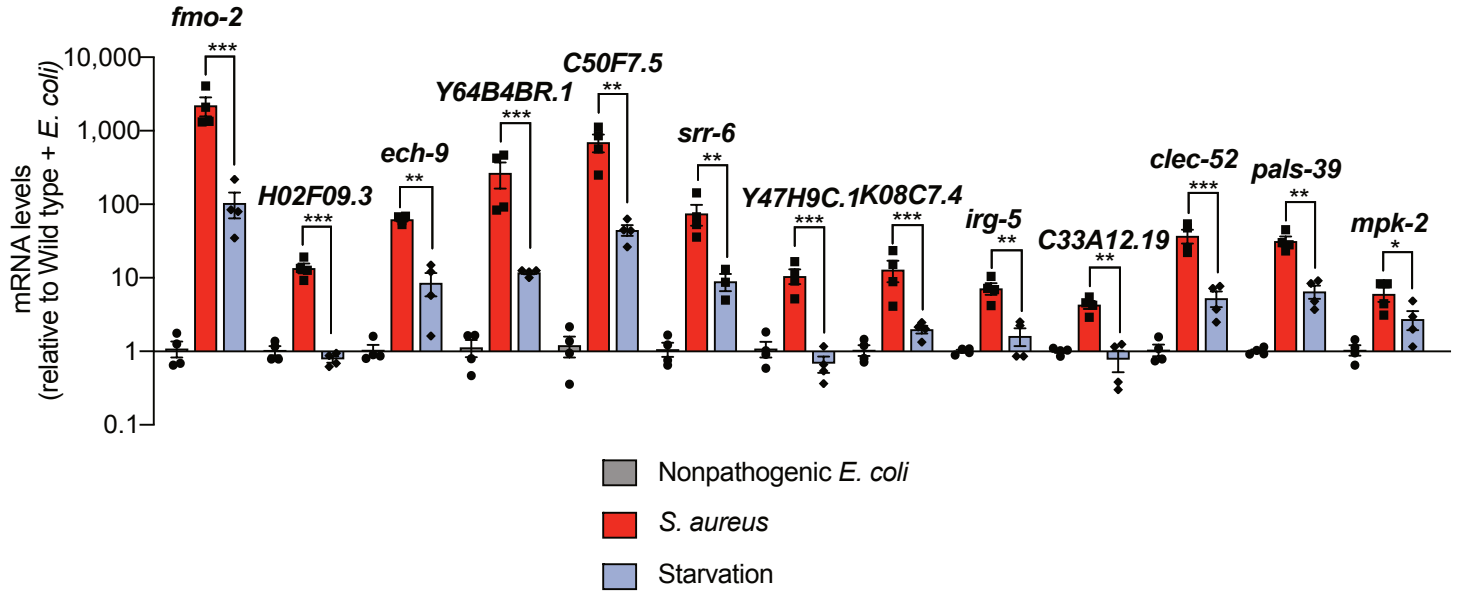

**B**

*hlh-30(-)*

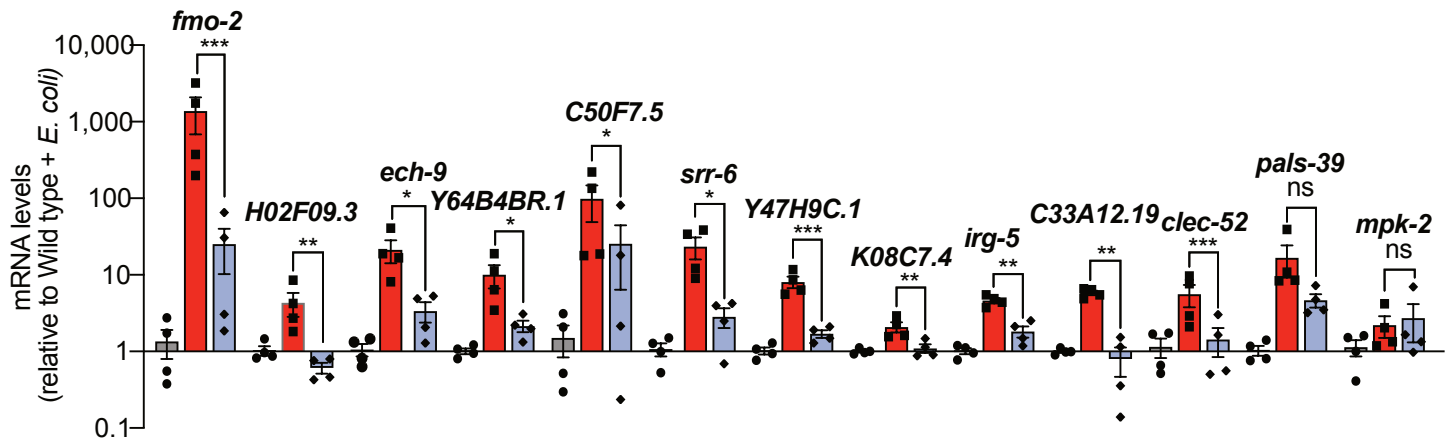

Supplement: supp [file elife-62775-supp-v1.zip]

# WANI et al - Figure 8—figure supplement 7

Nonpathogenic *E. coli* *S. aureus*

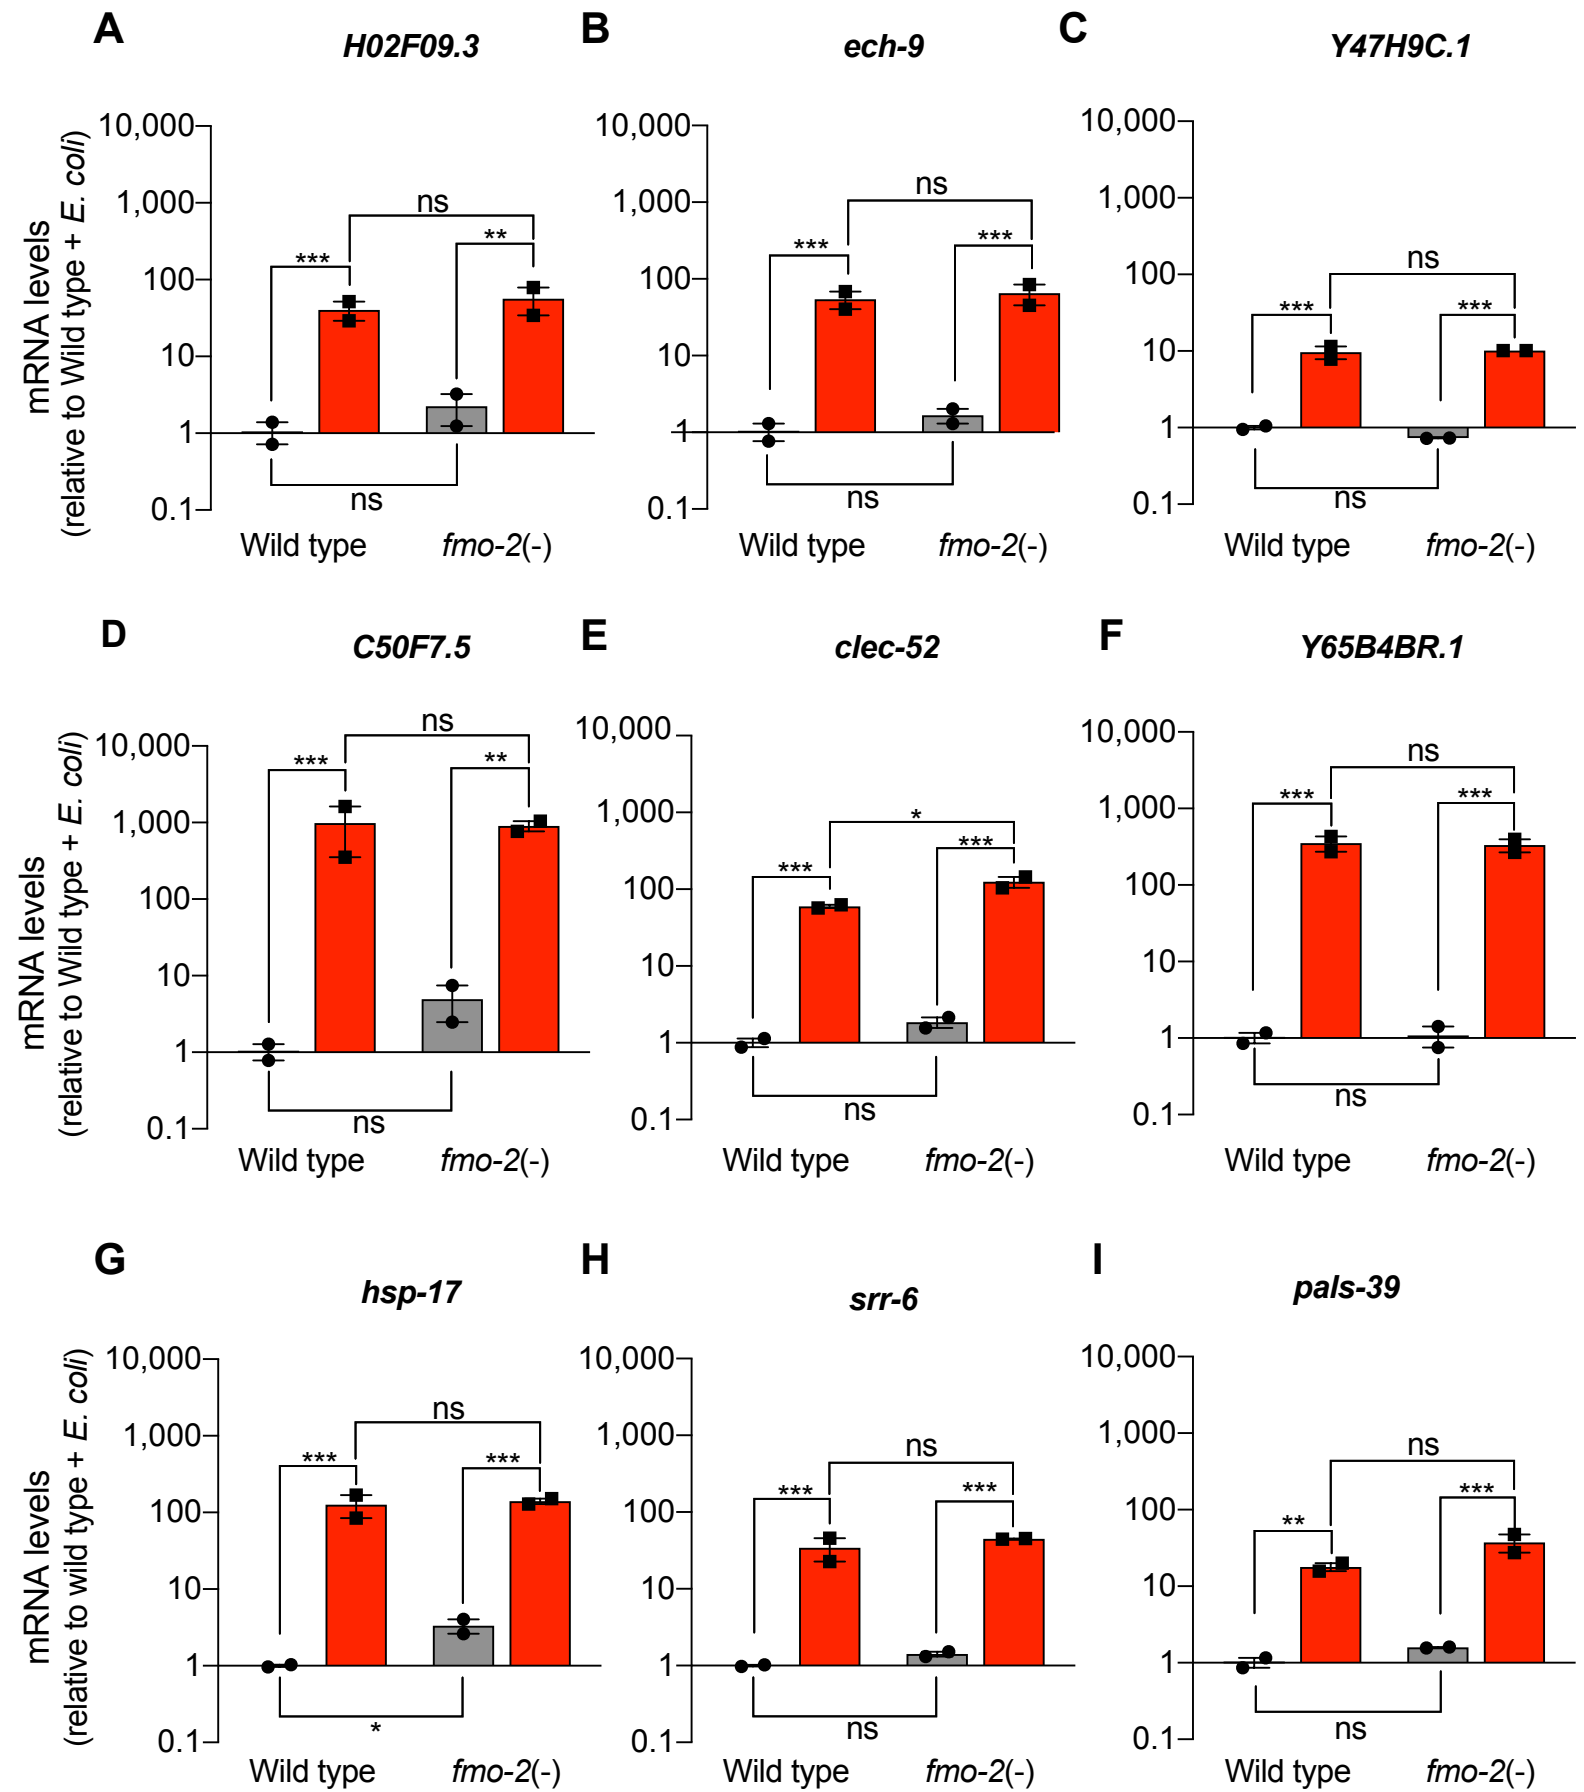

Supplement: supp [file elife-62775-supp-v1.zip]

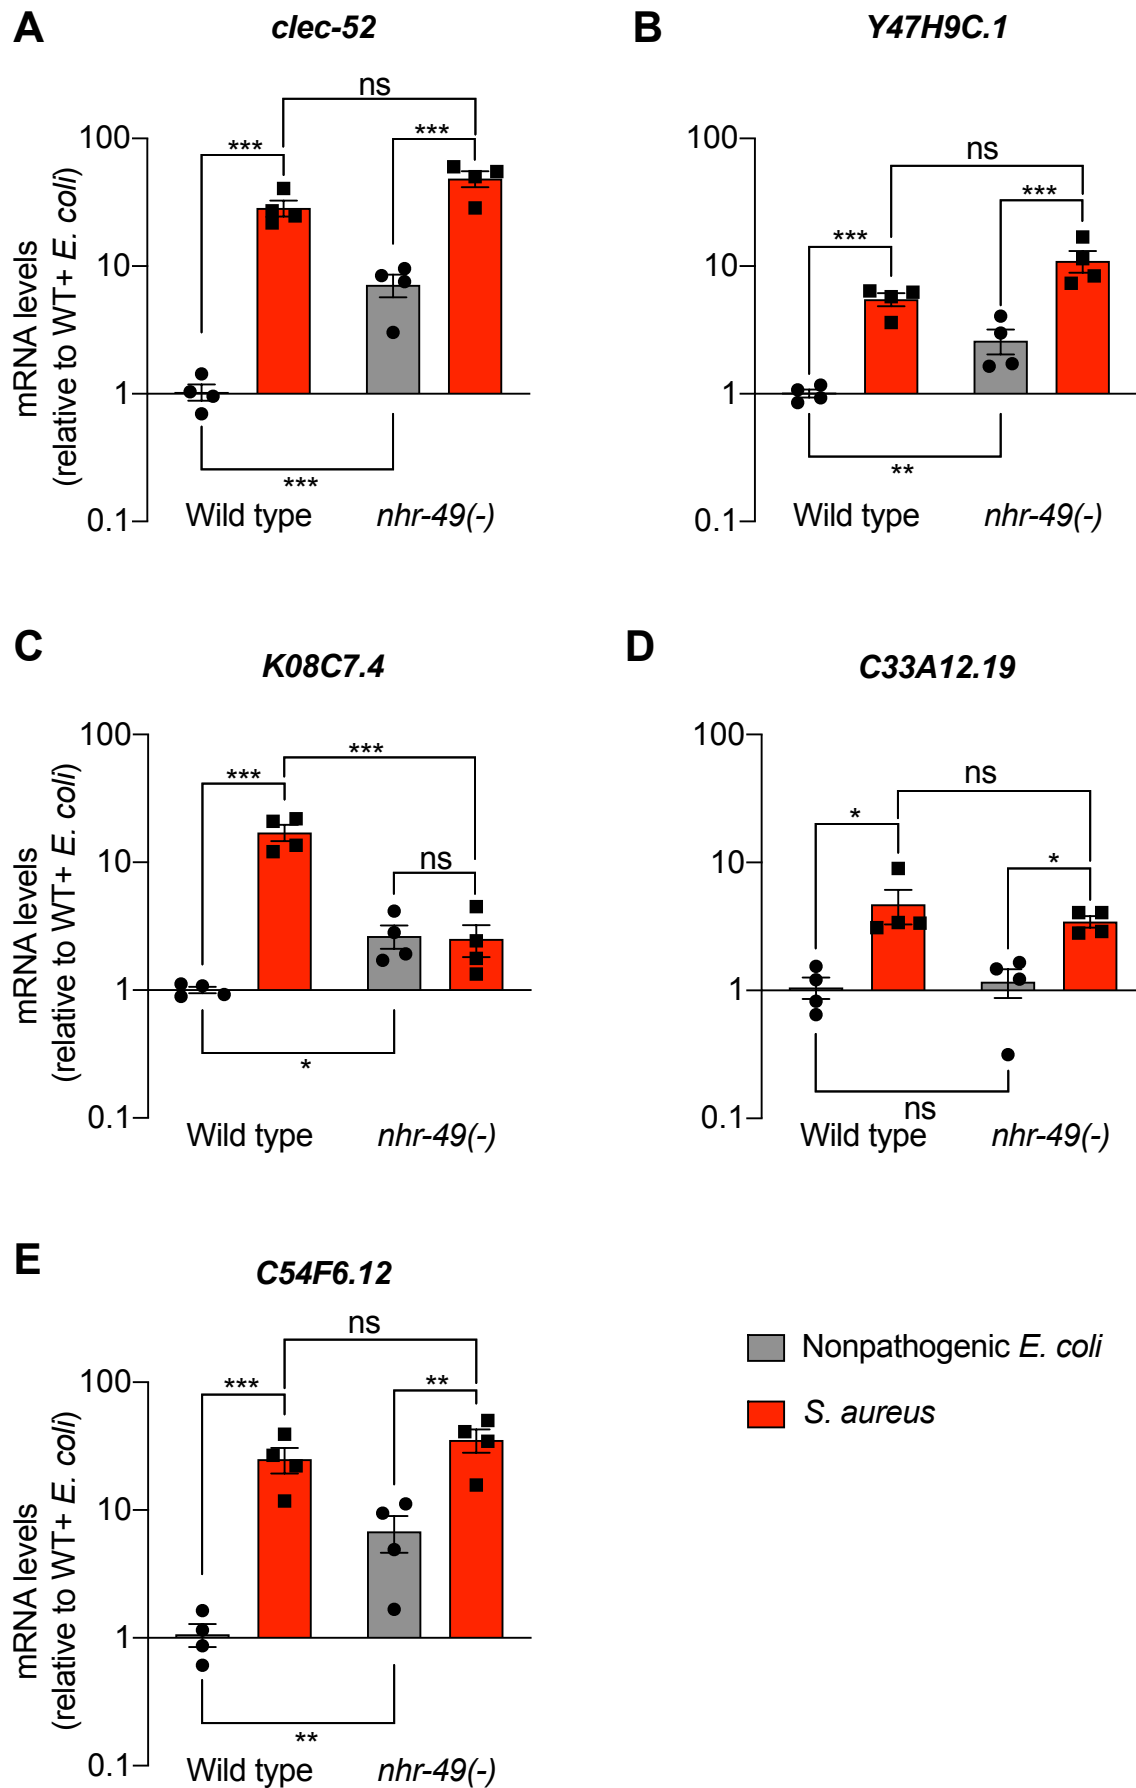

Supplement: supp [file elife-62775-supp-v1.zip]

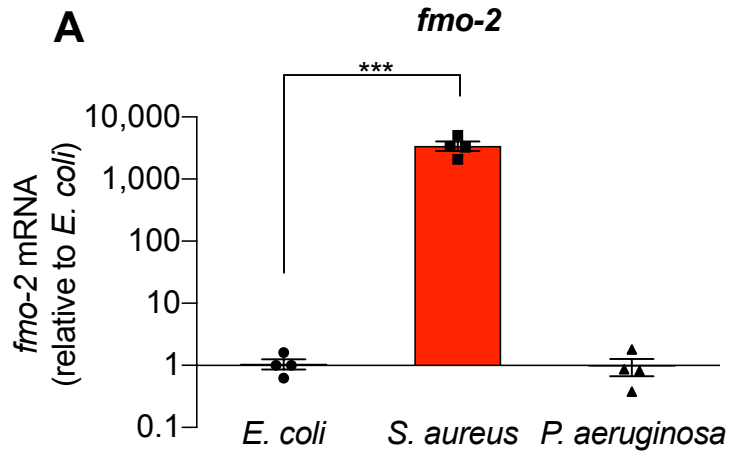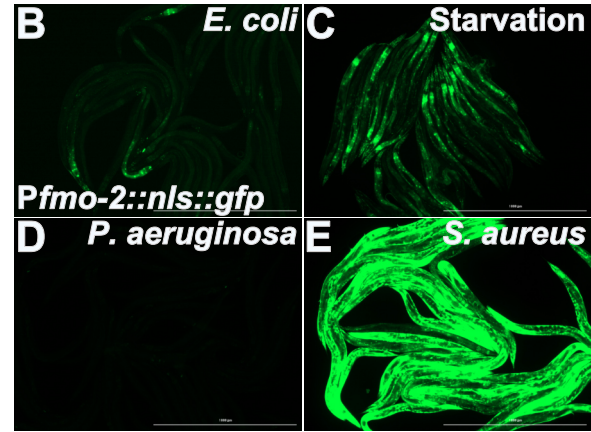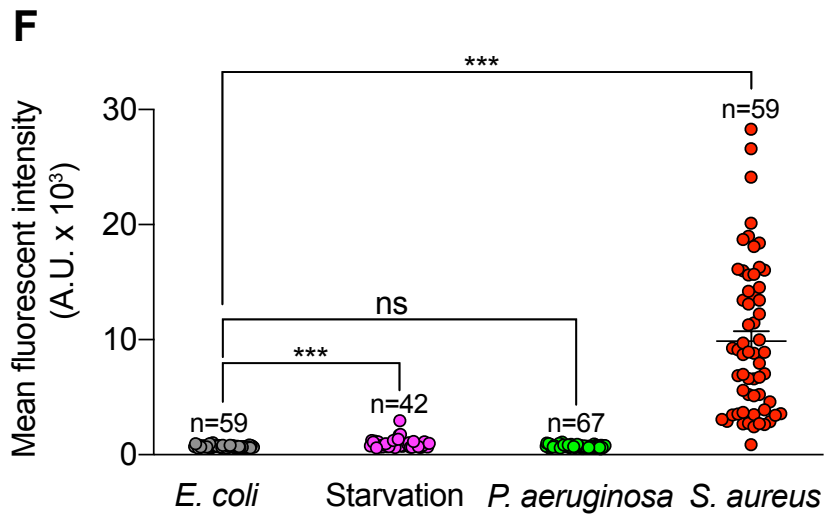

Supplement: supp [file elife-62775-supp-v1.zip]

A

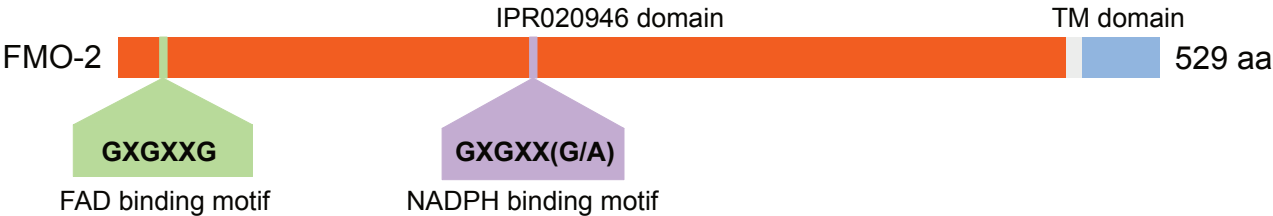

B

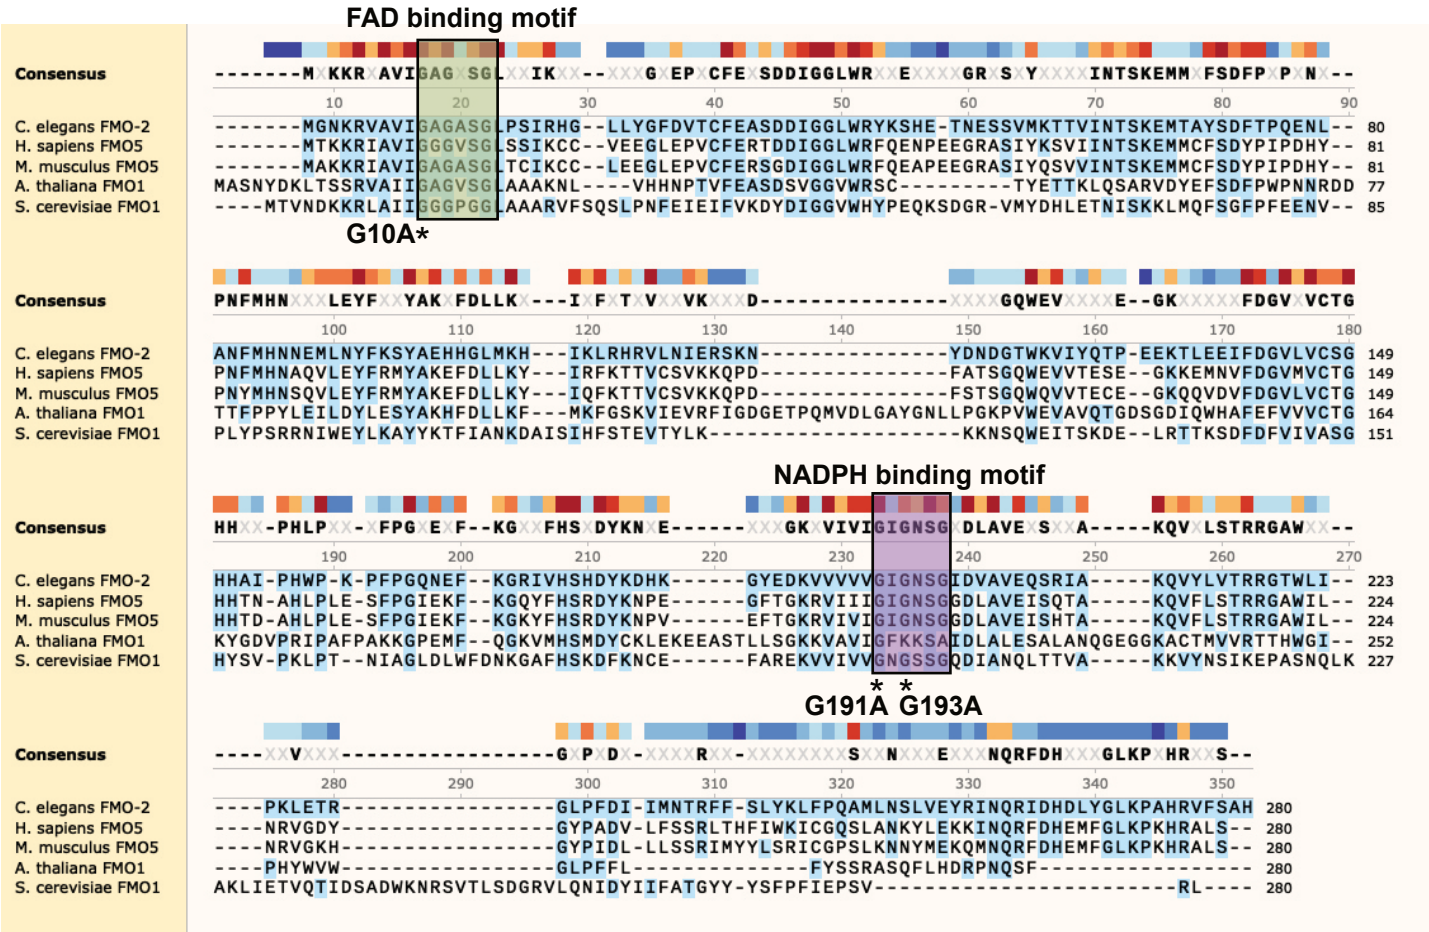

Supplement: supp [file elife-62775-supp-v1.zip]

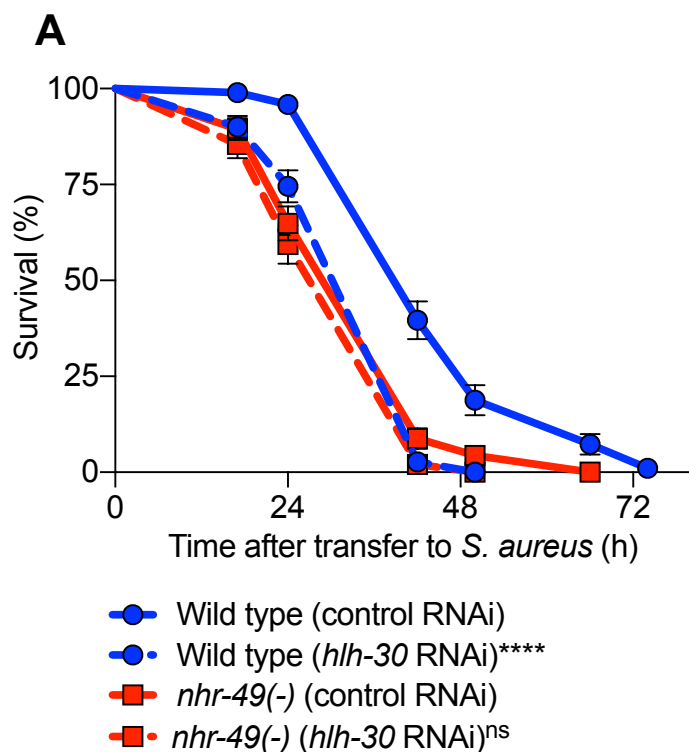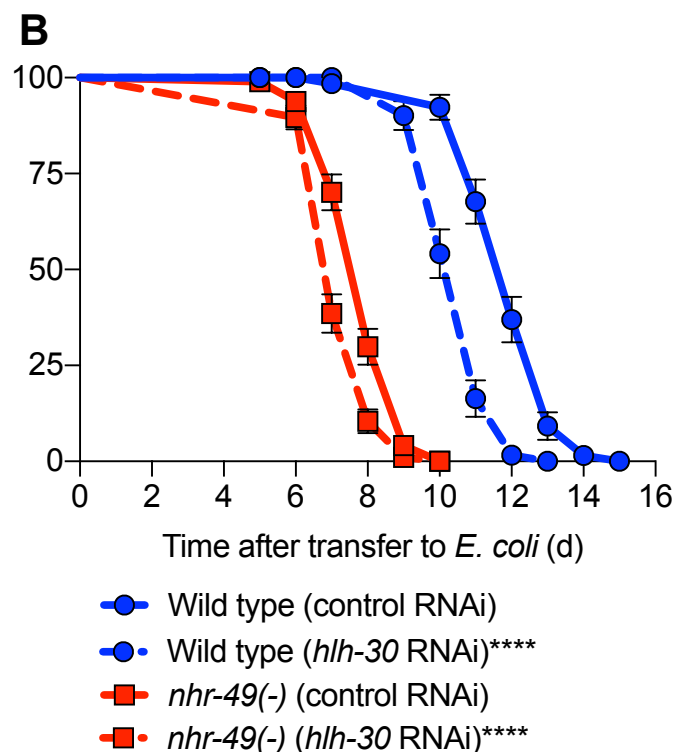

Supplement: supp [file elife-62775-supp-v1.zip]

A

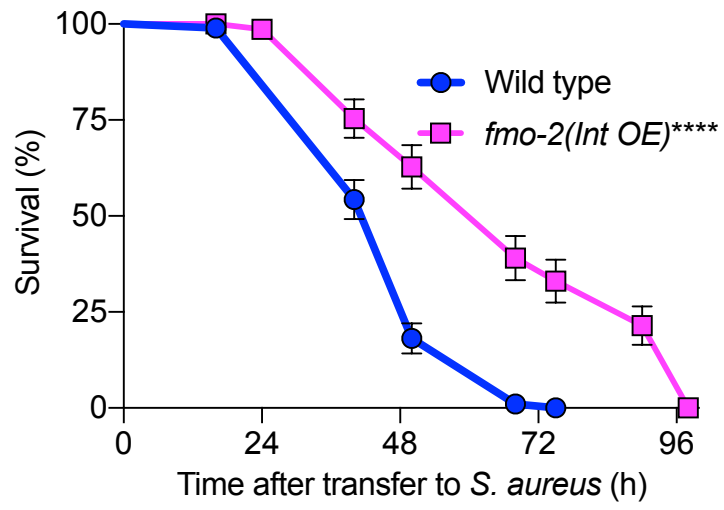

B

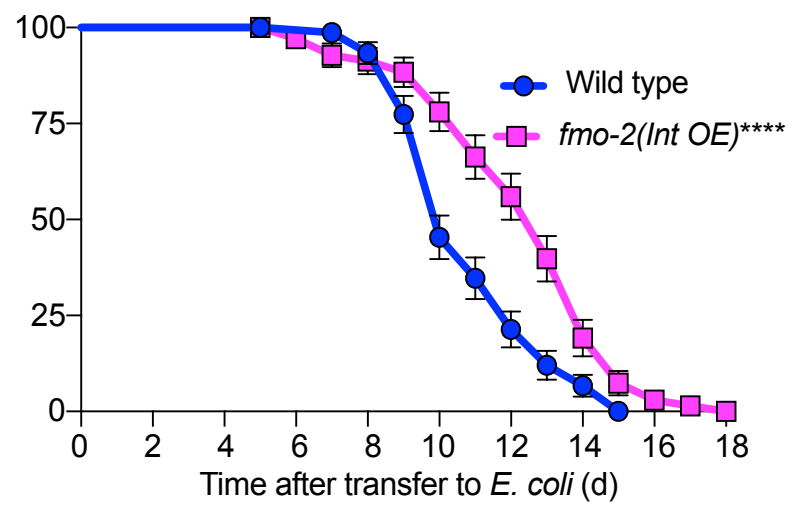

Supplement: supp [file elife-62775-supp-v1.zip]

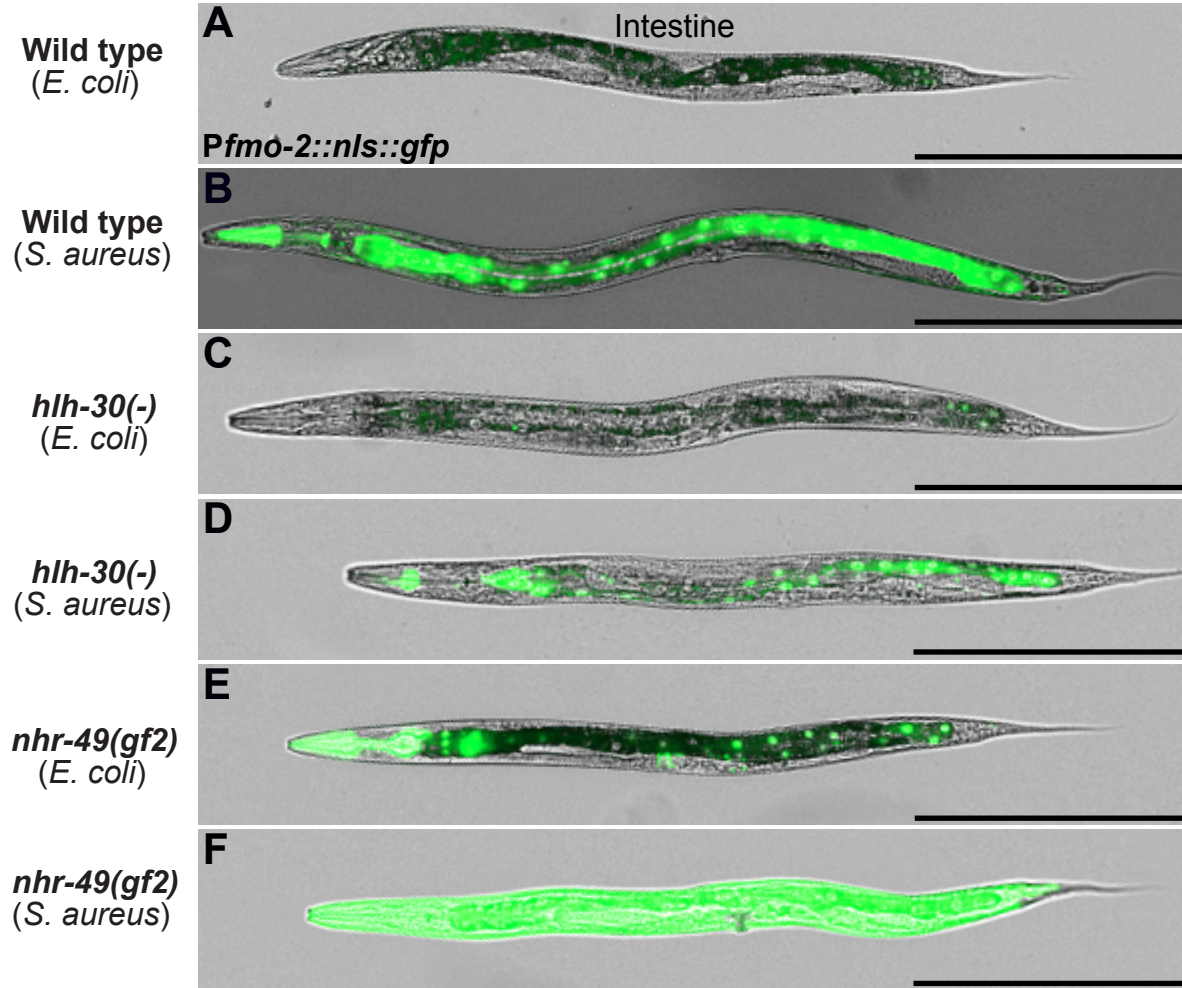

Supplement: supp [file elife-62775-supp-v1.zip]

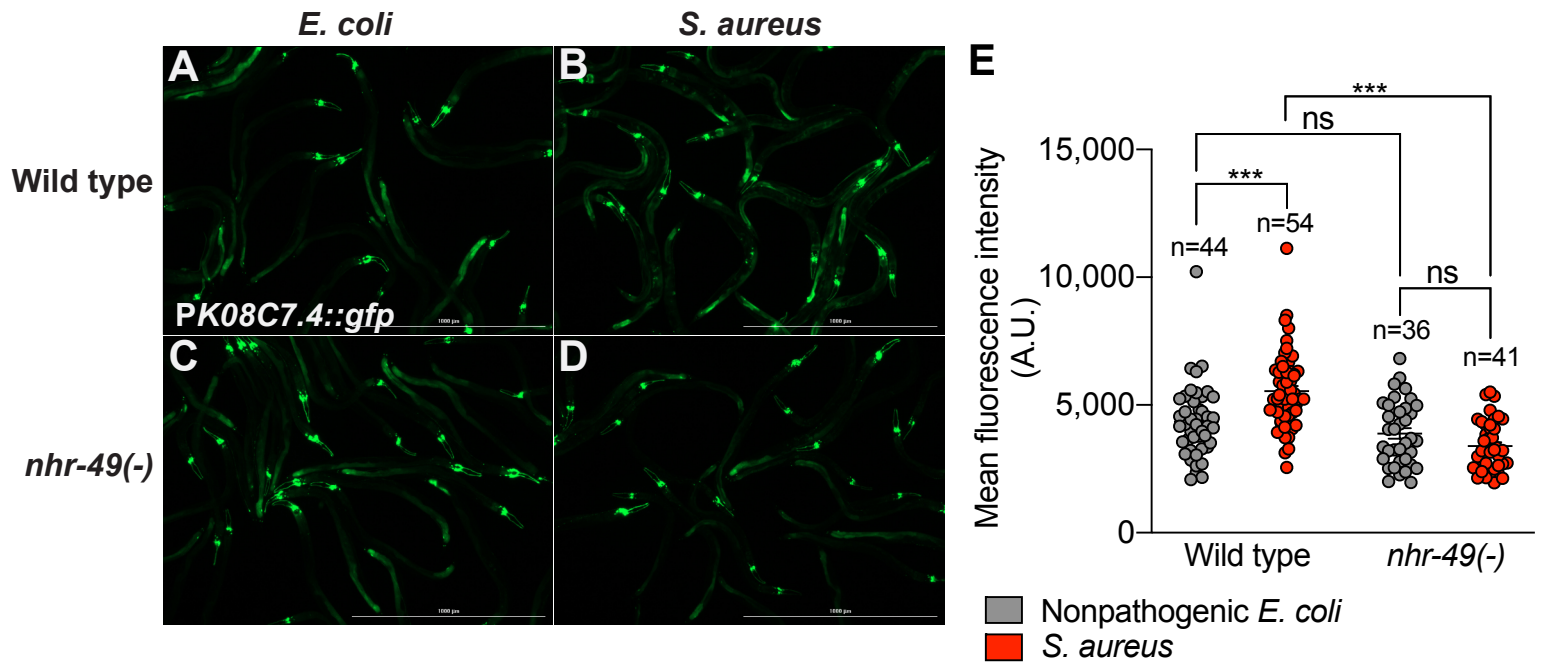

Supplement: supp [file elife-62775-supp-v1.zip]

**A**

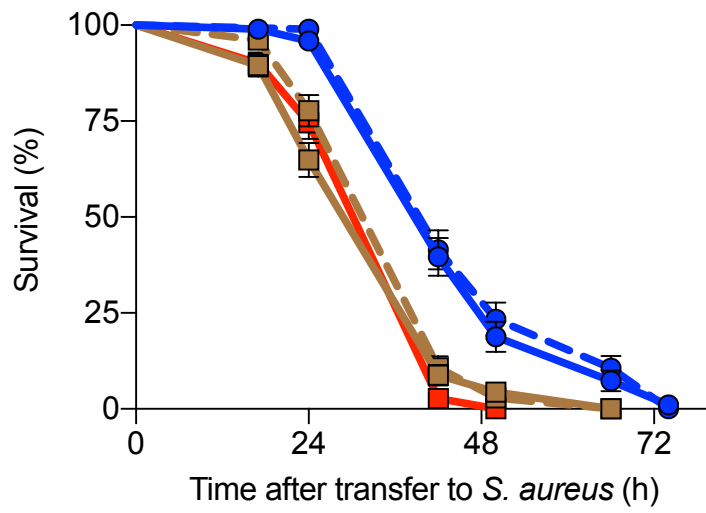

**B**

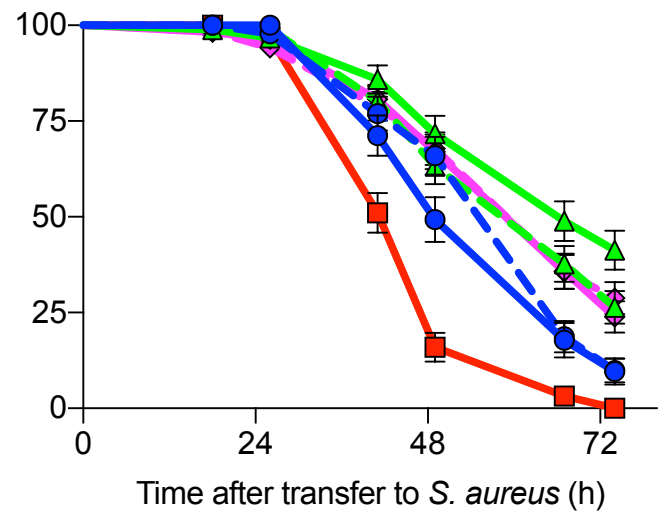

Supplement: supp [file elife-62775-supp-v1.zip]
